# Supplementary material for: Classification of Subgroups with Immune Characteristics Based on DNA Methylation in Luminal Breast Cancer
Source: Int J Mol Sci. 2022 Oct 22;23(21):12747. doi: 10.3390/ijms232112747 (PMC9658742; doi:10.3390/ijms232112747)
Supplement: Supplementary file 1 [file ijms-23-12747-s001.zip]

Archive with 4 entries (4 files):
- Supplementary.pdf
- Table S1_luminalAB_KEGG.xlsx
- Table S2_Differences of DNA methylation levels in luminal AB.xlsx
- Table S3_quantitative image features.xlsx
