# Supplementary material for: Classification of Subgroups with Immune Characteristics Based on DNA Methylation in Luminal Breast Cancer
Source: Int J Mol Sci. 2022 Oct 22;23(21):12747. doi: 10.3390/ijms232112747 (PMC9658742; doi:10.3390/ijms232112747)
Supplement: Supplementary file 1 [file ijms-23-12747-s001.zip › Table S1_luminalAB_KEGG.xlsx]

## Sheet: Luminal A_KEGG
Luminal A_KEGG pathway
Term	Database	ID	Input number	Background number	Input	P-Value
Olfactory transduction	KEGG PATHWAY	hsa04740	93	448	OR52B6|OR10C1|OR2D2|OR10K2|OR9A4|OR1A1|OR12D2|OR12D3|OR52J3|OR5AK2|OR2T1|OR7D4|OR10T2|CAMK2A|OR1A2|OR2T5|OR2T3|OR51A7|OR51I1|OR6T1|OR5AS1|OR5A1|OR52K2|OR1B1|OR56A3|OR2W1|OR4F6|OR4D11|PRKG2|OR2AG2|OR2AG1|GUCY2D|OR5L1|OR5L2|OR5T1|CNGA3|OR1J4|OR4K5|OR51F2|OR4K1|OR2M2|OR11A1|OR2H2|OR2H1|OR10Z1|OR52N2|OR2Y1|OR4D1|OR4D2|OR4D6|OR8K1|OR2T34|SLC8A2|OR2T33|OR4F15|OR6K2|OR51E2|OR1M1|SLC8A1|OR8B4|OR8B8|OR5V1…	6.22e-25
Neuroactive ligand-receptor interaction	KEGG PATHWAY	hsa04080	77	338	HTR5A|SSTR4|ADORA1|GABRG2|P2RX5|GRIA1|GHSR|GRIA4|GRIK5|PRSS1|ADCYAP1|GABRA4|PTGDR|TSHR|GABBR2|OPRM1|GABRA1|EDNRB|P2RX7|LHCGR|CNR2|PRLR|TAC1|S1PR1|GRIN2B|GRIN3A|GABRG3|GRIN2A|VIPR2|HRH3|HTR2A|EDN3|GPR83|PENK|GRM1|PRLHR|TRH|KISS1|GRID1|GRID2|OXT|MC3R|CHRM3|CHRM2|LEPR|HTR6|UCN|HTR4|MAS1|POMC|MTNR1B|GABRB2|P2RY6|GRM6|ADRA1D|BDKRB1|F2|GRM7|CRH|SST|GLRA1|DRD5|DRD2|DRD3|LEP|GALR2|GALR1|NMBR|NPY|NPBWR2|N…	5.84e-23
Pathways in cancer	KEGG PATHWAY	hsa05200	71	530	CSF2RB|RASGRP2|PDGFRA|FGF9|IL23A|BIRC8|RASSF1|CDKN1A|LAMA2|SMAD2|SMAD3|PLCG1|ADCY4|IFNGR2|MITF|EDNRB|FLT4|FLG|JAK3|ARHGEF12|HEYL|SPI1|ZBTB16|RASGRP3|GNG11|TPM3|DCC|ETS1|GNG4|IL15|TERT|PDGFRB|CUL1|GNA13|LAMA1|TGFBR1|BRCA2|LAMA4|IL5RA|PRKCB|CAMK2A|KLK3|PTGS2|VEGFC|FGF8|FGF6|FGF3|FGF2|TGFB2|IGF1|BDKRB1|F2|ALK|ESR1|NOTCH4|WNT2|CCND2|GSTM5|SLC2A1|STAT5A|RUNX1|GNA12|WNT9B|CDK6|F2RL3|VEGFA|AGTR1|LPAR5|M…	5.64e-11
Cell adhesion molecules (CAMs)	KEGG PATHWAY	hsa04514	33	146	ITGA8|CLDN10|CLDN11|CLDN16|CLDN14|CLDN15|VCAN|CD34|TIGIT|CNTNAP2|CD80|CD86|CLDN8|CLDN9|MADCAM1|CDH5|CADM3|CLDN6|JAM2|JAM3|CLDN22|CD40|CLDN25|NFASC|VCAM1|CD8A|PDCD1LG2|SELE|NRXN3|NRXN1|CDH4|MAG|HLA-DQA2	1.37e-10
cAMP signaling pathway	KEGG PATHWAY	hsa04024	39	214	FXYD1|ADORA1|GRIA1|GRIA4|RAPGEF4|ADCYAP1|TSHR|GABBR2|BDNF|MYL9|AMH|RYR2|GRIN3A|GRIN2A|VIPR2|EDN3|OXT|CREB5|CAMK2A|CHRM2|HTR6|HTR4|CNGA3|POMC|FFAR2|GHSR|ADCY4|PPP1CC|SST|DRD5|DRD2|HCN4|GRIN2B|ATP1A4|NPY|PDE4B|PDE4D|CFTR|HHIP	7.75e-10
PI3K-Akt signaling pathway	KEGG PATHWAY	hsa04151	48	354	ITGA8|JAK3|PDGFRA|PPP2CB|FGF9|PDGFRB|TNXB|CDKN1A|PPP2R3A|ITGA5|IGF1|MCL1|BDNF|FLT4|FLG|FLT1|PRLR|THBS4|THBS2|GNG11|COL29A1|PIK3R5|RELN|MAGI2|LAMA1|LAMA2|NTF3|LAMA4|ITGB6|CREB5|EFNA3|CHRM2|PPP2R2B|VEGFA|VEGFC|FGF8|FGF6|COL9A1|FGF3|FGF2|TCL1A|CCND2|G6PC|GNG4|COL1A2|CDK6|VWF|LPAR5	5.01e-08
Calcium signaling pathway	KEGG PATHWAY	hsa04020	33	193	CD38|HTR5A|PDGFRA|PDGFRB|PLCG1|EDNRB|P2RX5|P2RX7|LHCGR|RYR1|CACNA1A|RYR3|RYR2|CACNA1E|HTR2A|SLC8A1|SLC8A2|GRM1|ADCY4|PRKCB|CHRM3|CAMK2A|CHRM2|HTR6|HTR4|BDKRB1|ADRA1D|DRD5|MYLK|PDE1C|GRIN2A|AGTR1|CACNA1B	5.78e-08
Nicotine addiction	KEGG PATHWAY	hsa05033	15	40	GRIN2B|GABRG3|GABRG2|SLC32A1|GRIA1|GABRA4|GRIA4|GRIN3A|GRIN2A|CACNA1A|GABRD|GABRB2|GABRA6|GABRA1|CACNA1B	6.83e-08
Rap1 signaling pathway	KEGG PATHWAY	hsa04015	34	210	RASGRP2|RASGRP3|PDGFRA|FGF9|PDGFRB|RAPGEF4|PLCG1|RAPGEF2|LCP2|FLT4|FLG|FLT1|BCAR1|PARD6B|GRIN2A|MAGI2|SIPA1|SIPA1L1|IGF1|PRKCB|EFNA3|VEGFA|VEGFC|FGF8|FGF6|FGF3|FGF2|ADCY4|DRD2|ID1|GRIN2B|PFN3|F2RL3|LPAR5	1.17e-07
Tight junction	KEGG PATHWAY	hsa04530	30	170	CLDN10|CD1E|SYNPO|CD1C|CLDN14|CD1A|CD1D|MYH13|RAPGEF2|CLDN11|CD1B|MYL9|MYH4|CLDN15|PARD6B|CLDN8|CLDN9|CLDN16|CLDN6|JAM2|JAM3|BVES|CLDN22|CLDN25|PPP2R2B|GATA4|PPP2CB|EZR|RUNX1|CFTR	1.24e-07
Regulation of actin cytoskeleton	KEGG PATHWAY	hsa04810	34	214	ITGA8|PDGFRB|PDGFRA|CYFIP2|FGF8|ITGA5|FLG|MYL9|BCAR1|GSN|GNA13|SPATA13|ARHGEF12|ITGB6|CHRM3|CHRM2|CFL2|FGF9|SSH1|FGF6|FGF3|FGF2|BDKRB1|F2|PPP1CC|MOS|MYLK|EZR|PFN3|GNA12|GIT1|PAK7|ITGAE|LPAR5	1.73e-07
Maturity onset diabetes of the young	KEGG PATHWAY	hsa04950	12	26	NEUROD1|PAX6|ONECUT1|SLC2A2|HNF1B|PAX4|FOXA2|NR5A2|HNF1A|NEUROG3|PDX1|NKX6-1	2.38e-07
Leukocyte transendothelial migration	KEGG PATHWAY	hsa04670	23	112	CLDN10|CLDN11|CLDN16|CLDN14|CLDN15|RAPGEF4|PLCG1|MYL9|CLDN8|CLDN9|SIPA1|CDH5|CLDN6|JAM2|JAM3|CLDN22|PRKCB|CLDN25|VCAM1|BCAR1|ITK|EZR|MMP2	3.6e-07
Axon guidance	KEGG PATHWAY	hsa04360	30	181	NFATC4|EPHA5|ABLIM2|EPHA3|EPHA1|DCC|BMPR1B|SEMA4A|MYL9|PARD6B|SLIT2|RGMA|ARHGEF12|EPHB6|SRGAP1|EFNA3|CAMK2A|UNC5D|ABLIM1|FES|SSH1|SEMA7A|RHOD|NGEF|SEMA3C|SEMA3B|NCK1|PLCG1|PAK7|CFL2	4.08e-07
Morphine addiction	KEGG PATHWAY	hsa05032	20	91	ADCY4|PDE1C|GABRA1|ADORA1|GABRG2|SLC32A1|PRKCB|GABRA4|OPRM1|GNG11|PDE4B|GNG4|CACNA1B|GABRG3|CACNA1A|GABRD|GABBR2|GABRA6|PDE4D|GABRB2	8.18e-07
Long-term depression	KEGG PATHWAY	hsa04730	16	60	GRIA1|GRID2|RYR1|CACNA1A|PPP2CB|PRKCB|PLA2G4F|GRM1|IGF1|GNA12|GNA13|PRKG2|PLA2G4C|LYN|CRH|C7orf16	1.19e-06
TGF-beta signaling pathway	KEGG PATHWAY	hsa04350	20	94	GREM2|AMH|TGFBR1|GREM1|ID1|ACVR2A|NODAL|ID4|PPP2CB|LEFTY2|TGFB2|SMAD2|SMAD3|HFE2|BMPR1B|GDF5|PITX2|FBN1|CUL1|RGMA	1.27e-06
Cytokine-cytokine receptor interaction	KEGG PATHWAY	hsa04060	39	294	CSF2RB|TNFSF11|CCL1|TNFRSF10D|IL23A|NODAL|CCL8|TNFSF18|TGFBR1|IL21|IL20|BMPR1B|BMP10|CCR5|IFNGR2|TSLP|IL1B|TNFSF13B|AMH|TGFB2|PRLR|GDF5|THPO|CXCR1|CX3CL1|TNFSF4|ACVR2A|IL5RA|ACVRL1|IL17A|CD40|LEPR|IL32|CXCL17|CCL11|CCL13|IL15|LEP|EDAR	1.4e-06
Focal adhesion	KEGG PATHWAY	hsa04510	30	199	ITGA8|PDGFRB|PDGFRA|THBS2|ITGA5|FLT4|CAV2|FLT1|THBS4|TNXB|COL29A1|RELN|SCT|MYL9|LAMA1|LAMA2|IGF1|LAMA4|ITGB6|PRKCB|COL9A1|VEGFA|VEGFC|BCAR1|PPP1CC|CCND2|MYLK|COL1A2|VWF|PAK7	2.33e-06
Gastric acid secretion	KEGG PATHWAY	hsa04971	17	75	SLC9A4|KCNJ2|KCNJ1|PRKCB|EZR|KCNJ16|ATP4B|ADCY4|SST|MYLK|CHRM3|CAMK2A|KCNK2|KCNQ1|ATP1A4|KCNK10|CFTR	3.74e-06
MicroRNAs in cancer	KEGG PATHWAY	hsa05206	38	299	PTGS2|PDGFRA|FOXP1|MIR195|TRIM71|RECK|RASSF1|CDKN1A|TGFB2|MIR9-3|PLCG1|EZR|HDAC4|BMF|MIR206|TNXB|PRKCB|MIR34A|MARCKS|PDGFRB|MIR122|MIR124-3|MIR124-2|MIR129-2|EFNA3|ITGA5|VEGFA|IGF2BP1|MIR21|ZEB2|CYP24A1|NOTCH4|CCND2|HOXD10|VIM|CDK6|MIR520B|MCL1	4.7e-06
ECM-receptor interaction	KEGG PATHWAY	hsa04512	18	86	ITGA8|LAMA1|LAMA2|FRAS1|ITGB6|TNXB|THBS4|HSPG2|THBS2|ITGA5|CD36|COL9A1|COL29A1|COL1A2|RELN|SV2A|LAMA4|VWF	5.17e-06
Ras signaling pathway	KEGG PATHWAY	hsa04014	32	232	RASGRP2|RASGRP3|PDGFRA|VEGFC|PDGFRB|RASSF1|PLCG1|IGF1|BDNF|ETS1|FLG|FLT1|GNG11|FGF2|PLA2G5|KSR2|NTF3|PRKCB|EFNA3|VEGFA|FGF9|FGF8|PLA2G4C|FGF6|FGF3|PLA2G4F|RASGRF2|FLT4|GRIN2B|GNG4|GRIN2A|PAK7	5.82e-06
Metabolic pathways	KEGG PATHWAY	hsa01100	119	1433	CD38|PTGS2|AOC2|MAT1A|P4HA3|FBP1|B3GAT2|CYP4F2|PDE9A|AHCYL2|SELENBP1|NDST1|PLA2G5|NNT|LIPC|TBXAS1|LIPG|DEGS1|TPO|PCYT2|BCAT1|CDO1|ADCY4|INPP5B|HYAL2|PLCG1|DGKD|ALDH5A1|STAR|ALDH3A1|H6PD|GPLD1|PTGDS|COX6B2|ACADL|B3GAT1|CYP11A1|XDH|LTC4S|GBA3|B4GALT6|GUCY2D|UMPS|NT5C1A|UAP1|GALNT9|COX7A1|MGA|ST8SIA5|CYP19A1|G6PC|GPX3|ELOVL2|ANPEP|ECHDC1|HAAO|ME3|AKR1C4|ALDOC|GAD2|ST6GALNAC3|UGT2B15|UGT2B11|ATP6V0C|…	7.16e-06
GABAergic synapse	KEGG PATHWAY	hsa04727	18	89	ADCY4|GABRG3|GABRG2|SLC32A1|PRKCB|GABRA4|GNG11|SLC12A5|GNG4|CACNA1B|ABAT|CACNA1A|GABRD|GABRB2|GABRA6|GABRA1|GABBR2|GAD2	7.81e-06
Oxytocin signaling pathway	KEGG PATHWAY	hsa04921	24	153	CD38|PTGS2|NFATC4|CDKN1A|TRPC7|MYL9|RYR1|RYR3|RYR2|PIK3R5|RCN1|OXT|PRKCB|CAMK2A|PLA2G4C|PLA2G4F|ADCY4|KCNJ2|PPP1CC|MYLK|CACNG8|CACNG3|CACNG5|CACNG6	1.28e-05
Glutamatergic synapse	KEGG PATHWAY	hsa04724	20	114	ADCY4|GRIN2B|PRKCB|CACNA1A|GRIA1|CPD|GRIK5|GRIA4|PLA2G4F|GRIN3A|GRM1|GNG4|GRIN2A|GNG11|PLA2G4C|GRM6|GRM7|SHANK3|SHANK2|SLC1A3	1.6e-05
MAPK signaling pathway	KEGG PATHWAY	hsa04010	36	295	RASGRP2|RASGRP3|PDGFRA|FGF9|PDGFRB|TGFB2|IGF1|RAPGEF2|IL1B|BDNF|FLG|FLT1|CACNA1A|CACNA1B|CACNA1E|PLA2G4F|SCT|TGFBR1|NTF3|PRKCB|EFNA3|VEGFA|VEGFC|FGF8|PLA2G4C|FGF6|FGF3|FGF2|PTPRR|RASGRF2|FLT4|CACNG8|GNA12|CACNG3|CACNG5|CACNG6	1.82e-05
Phospholipase D signaling pathway	KEGG PATHWAY	hsa04072	23	148	PDGFRB|PDGFRA|RAPGEF4|PLCG1|DNM3|FCER1A|PIK3R5|CXCR1|DGKI|GNA12|GRM6|GRM7|GRM1|DGKD|GNA13|PLA2G4C|PLA2G4F|ADCY4|F2|AGPAT3|AGPAT2|AGTR1|LPAR5	2.19e-05
Complement and coagulation cascades	KEGG PATHWAY	hsa04610	16	79	BDKRB1|F2|CFI|F7|C4BPA|C4BPB|CD55|PLAT|C1S|SERPING1|APC|F2RL3|CLU|VWF|FGG|PROC	2.42e-05
Insulin secretion	KEGG PATHWAY	hsa04911	16	86	ADCY4|SNAP25|KCNMB2|CREB5|RYR2|CHRM3|CAMK2A|SLC2A1|SLC2A2|RAPGEF4|PRKCB|ATP1A4|KCNN3|ADCYAP1|PDX1|RIMS2	5.93e-05
Dilated cardiomyopathy (DCM)	KEGG PATHWAY	hsa05414	17	96	ITGA8|LAMA1|LAMA2|RYR2|ITGB6|ADCY4|SGCD|TPM3|TGFB2|ITGA5|CACNG8|IGF1|SLC8A1|SLC8A2|CACNG3|CACNG5|CACNG6	6.08e-05
Hematopoietic cell lineage	KEGG PATHWAY	hsa04640	17	97	CD38|IL5RA|CD1E|CD1B|CD1C|CD1D|CD55|CD1A|CD34|ITGA5|CD36|THPO|ANPEP|CD8A|IL1B|CD9|HLA-DQA2	6.81e-05
Signaling pathways regulating pluripotency of stem cells	KEGG PATHWAY	hsa04550	21	140	JAK3|OTX1|MYF5|ACVR2A|HAND1|ISL1|ONECUT1|WNT9B|LEFTY2|ID4|MEIS1|SMAD3|BMPR1B|PAX6|SMAD2|IGF1|NODAL|ID1|FGF2|FLG|WNT2	7.7e-05
Dopaminergic synapse	KEGG PATHWAY	hsa04728	20	131	PPP2CB|PPP1CC|CACNA1A|DRD4|PPP2R3A|DRD2|CAMK2A|GRIA4|PPP2R2B|GRIN2B|PRKCB|GNG4|GRIN2A|GRIA1|GNG11|CREB5|SLC18A2|DRD3|CACNA1B|DRD5	9.11e-05
Hypertrophic cardiomyopathy (HCM)	KEGG PATHWAY	hsa05410	16	90	ITGA8|LAMA1|LAMA2|RYR2|ITGB6|SGCD|TPM3|TGFB2|ITGA5|CACNG8|IGF1|SLC8A1|SLC8A2|CACNG3|CACNG5|CACNG6	9.51e-05
Proteoglycans in cancer	KEGG PATHWAY	hsa05205	26	203	TGFB2|CDKN1A|HSPG2|ITGA5|SMAD2|PLCG1|EZR|CAV2|FLG|SCT|ARHGEF12|IGF1|PRKCB|CAMK2A|VEGFA|MIR21|FGF2|PPP1CC|ESR1|WNT2|HOXD10|ANK1|IHH|ANK3|WNT9B|MMP2	0.000124874
Human papillomavirus infection	KEGG PATHWAY	hsa05165	36	330	ITGA8|PTGS2|EIF2AK2|ATP6V0C|TNXB|CDKN1A|PPP2R3A|ITGA5|HEYL|THBS4|THBS2|PARD6B|COL29A1|RELN|TERT|PDGFRB|LAMA1|LAMA2|PPP2CB|LAMA4|ITGB6|CREB5|PPP2R2B|VEGFA|COL9A1|TBPL2|LFNG|NOTCH4|WNT2|CCND2|COL1A2|WNT9B|CDK6|VWF|HES3|HES6	0.000146175
Adrenergic signaling in cardiomyocytes	KEGG PATHWAY	hsa04261	21	149	ADCY4|RYR2|CACNG3|ADRA1D|PPP2CB|RAPGEF4|CREB5|PPP2R3A|TPM3|CAMK2A|PPP2R2B|CACNG8|PIK3R5|ATP1A4|SLC8A1|SLC8A2|AGTR1|KCNQ1|CACNG5|CACNG6|PPP1CC	0.000168085
Th17 cell differentiation	KEGG PATHWAY	hsa04659	17	107	TGFBR1|RUNX1|IL17A|IL23A|IRF4|TBX21|PLCG1|SMAD2|SMAD3|IL21|STAT5A|CD247|JAK3|IFNGR2|PRKCQ|IL1B|HLA-DQA2	0.000195577
Circadian entrainment	KEGG PATHWAY	hsa04713	16	97	ADCY4|GRIA1|RYR1|RYR3|RYR2|CAMK2A|GRIA4|GNG11|GRIN2B|PRKCB|PER1|GRIN2A|GNG4|ADCYAP1|PRKG2|MTNR1B	0.000204475
Arrhythmogenic right ventricular cardiomyopathy (ARVC)	KEGG PATHWAY	hsa05412	14	77	ITGA8|LAMA1|LAMA2|RYR2|ITGB6|SGCD|ITGA5|CACNG8|ACTN2|SLC8A1|SLC8A2|CACNG3|CACNG5|CACNG6	0.000207595
Hippo signaling pathway	KEGG PATHWAY	hsa04390	21	154	AMH|TGFBR1|PPP2CB|ID1|PPP1CC|TP73|RASSF1|WNT2|CCND2|CRB1|PARD6B|SMAD2|PPP2R2B|WWTR1|BMPR1B|CSNK1D|GDF5|SMAD3|RASSF6|TGFB2|WNT9B	0.00025188
AGE-RAGE signaling pathway in diabetic complications	KEGG PATHWAY	hsa04933	16	100	PLCG1|TGFBR1|SELE|PRKCB|TGFB2|SMAD2|SMAD3|STAT5A|COL1A2|VCAM1|VEGFC|VEGFA|IL1B|MMP2|AGTR1|NOX4	0.000277615
NF-kappa B signaling pathway	KEGG PATHWAY	hsa04064	16	100	PTGS2|TNFSF11|CCL13|CARD11|PRKCB|CD40|BCL10|PLCG1|VCAM1|EDAR|PRKCQ|IL1B|TNFSF13B|LYN|MALT1|BLNK	0.000277615
Platelet activation	KEGG PATHWAY	hsa04611	18	124	RASGRP2|ADCY4|F2|TBXAS1|VWF|ARHGEF12|MYLK|F2RL3|PIK3R5|COL1A2|GNA13|PRKG2|PLA2G4C|LCP2|LYN|FGG|PLA2G4F|PPP1CC	0.000346562
Wnt signaling pathway	KEGG PATHWAY	hsa04310	21	160	SFRP2|RSPO2|SFRP1|NFATC4|WISP1|SFRP4|SFRP5|WNT2|CCND2|CAMK2A|PRKCB|SMAD3|WIF1|CTNND2|RSPO4|SOX17|NOTUM|VANGL2|DKK1|CUL1|WNT9B	0.000399086
Jak-STAT signaling pathway	KEGG PATHWAY	hsa04630	21	162	CSF2RB|AOX1|PDGFRA|IL23A|PDGFRB|PRLR|LEPR|CCND2|IL5RA|IL15|IL21|IL20|STAT5A|TSLP|JAK3|IFNGR2|LEP|THPO|GFAP|CDKN1A|MCL1	0.000462572
Transcriptional misregulation in cancer	KEGG PATHWAY	hsa05202	23	186	CDKN1A|MITF|HOXA10|FLT1|SPI1|ZBTB16|MEIS1|CD86|WT1|IGF1|TMPRSS2|FLI1|CD40|PLAT|PAX5|IGFBP3|PAX7|PROM1|LMO2|CCND2|TLX3|RUNX1|HOXA9	0.000465625
PPAR signaling pathway	KEGG PATHWAY	hsa03320	13	76	CPT1C|CPT2|CD36|SCD5|FABP7|PLTP|FABP3|ME3|SORBS1|SLC27A4|SLC27A6|ACADL|APOA1	0.00057749
Vascular smooth muscle contraction	KEGG PATHWAY	hsa04270	18	132	ADCY4|ARHGEF12|KCNMB2|ADRA1D|PPP1CC|MYLK|PRKCB|MRVI1|PRKCQ|PLA2G5|GNA12|GNA13|PLA2G4C|AGTR1|EDN3|PPP1R14A|PLA2G4F|MYL9	0.000673515
Asthma	KEGG PATHWAY	hsa05310	8	31	CCL11|RNASE3|FCER1A|CD40|EPO|PRG2|MBP|HLA-DQA2	0.000678512
Malaria	KEGG PATHWAY	hsa05144	10	49	TGFB2|SELE|THBS4|THBS2|CD40|CD36|VCAM1|DARC|IL1B|GYPC	0.00074911
Protein digestion and absorption	KEGG PATHWAY	hsa04974	14	90	COL29A1|PRSS1|COL11A1|KCNE3|SLC3A2|CPA1|COL9A1|KCNQ1|COL5A2|ATP1A4|COL1A2|SLC8A1|SLC8A2|MEP1A	0.000833959
Cholinergic synapse	KEGG PATHWAY	hsa04725	16	112	ADCY4|KCNJ2|PRKCB|CACNA1A|CHRM2|KCNQ5|CHRM3|CAMK2A|KCNQ1|PIK3R5|CREB5|GNG4|GNG11|SLC5A7|ACHE|CACNA1B	0.000840451
Steroid hormone biosynthesis	KEGG PATHWAY	hsa00140	11	60	CYP1A1|CYP1A2|CYP11A1|UGT2B15|CYP19A1|SULT1E1|UGT2B11|CYP11B2|AKR1C4|SRD5A2|CYP11B1	0.000907998
Retrograde endocannabinoid signaling	KEGG PATHWAY	hsa04723	19	148	ADCY4|PTGS2|PRKCB|GABRG3|GABRG2|SLC32A1|GRIA1|GABRA4|GNG4|GRIA4|GNG11|NDUFS2|CACNA1B|CACNA1A|GABRD|GABRB2|GABRA6|GABRA1|GRM1	0.000934135
Melanoma	KEGG PATHWAY	hsa05218	12	72	PDGFRB|PDGFRA|IGF1|CDK6|CDKN1A|FGF9|FGF8|MITF|FGF6|FGF3|FGF2|FLG	0.0011319
Taste transduction	KEGG PATHWAY	hsa04742	13	83	ADCY4|ACCN1|PDE1C|CACNA1A|CHRM3|HCN4|GRM1|SCNN1B|GABRA4|GABBR2|GABRA6|GABRA1|SCN3A	0.0011921
Arachidonic acid metabolism	KEGG PATHWAY	hsa00590	11	63	PTGS2|TBXAS1|GPX3|LTC4S|ALOX15|PLA2G5|GPX5|PLA2G4C|PTGDS|CYP4F2|PLA2G4F	0.00128914
cGMP-PKG signaling pathway	KEGG PATHWAY	hsa04022	20	167	ADCY4|MRVI1|KCNMB2|NFATC4|ADRA1D|ADORA1|CREB5|PPP1CC|MYLK|PIK3R5|ATP1A4|GNA12|GNA13|PRKG2|SLC8A1|AGTR1|GATA4|SLC8A2|EDNRB|MYL9	0.00149671
Inflammatory mediator regulation of TRP channels	KEGG PATHWAY	hsa04750	14	100	BDKRB1|ACCN1|IGF1|PPP1CC|ADCY4|PRKCB|CAMK2A|PRKCQ|PLCG1|TRPM8|PLA2G4C|HTR2A|IL1B|PLA2G4F	0.00204425
Synaptic vesicle cycle	KEGG PATHWAY	hsa04721	12	78	ATP6V0C|SLC6A5|SLC6A2|CACNA1A|SLC32A1|CPLX2|SNAP25|DNM3|UNC13A|SLC18A2|CACNA1B|SLC1A3	0.00207278
Apelin signaling pathway	KEGG PATHWAY	hsa04371	17	137	ADCY4|TGFBR1|SLC8A2|HDAC4|RYR1|RYR3|RYR2|GNG4|SMAD2|SMAD3|PIK3R5|GNA13|GNG11|SLC8A1|AGTR1|PLAT|MYLK	0.00233508
Rheumatoid arthritis	KEGG PATHWAY	hsa05323	13	91	ATP6V0C|TNFSF11|TGFB2|IL17A|IL23A|CD80|IL15|CD86|VEGFA|IL1B|TNFSF13B|HLA-DQA2|FLT1	0.00248132
Ovarian steroidogenesis	KEGG PATHWAY	hsa04913	9	49	ADCY4|CYP1A1|CYP11A1|LHCGR|CYP19A1|IGF1|PTGS2|PLA2G4C|PLA2G4F	0.00256647
Serotonergic synapse	KEGG PATHWAY	hsa04726	15	115	HTR5A|PTGS2|CACNA1A|CACNA1B|PRKCB|HTR4|GNG11|HTR6|ALOX15|HTR2A|GNG4|PLA2G4C|SLC18A2|GABRB2|PLA2G4F	0.00267832
Viral myocarditis	KEGG PATHWAY	hsa05416	10	60	LAMA1|LAMA2|CD55|CD80|NAT1|SGCD|CD40|CD86|EIF4G1|HLA-DQA2	0.00284853
Parathyroid hormone synthesis, secretion and action	KEGG PATHWAY	hsa04928	14	106	ADCY4|TNFSF11|CYP24A1|CREB5|PRKCB|KL|GNA12|GNA13|CASR|PDE4B|GCM2|PDE4D|CDKN1A|FLG	0.00329968
Cardiac muscle contraction	KEGG PATHWAY	hsa04260	12	86	SLC8A2|RYR2|TPM3|CACNG8|COX4I2|ATP1A4|SLC8A1|COX7A1|COX6B2|CACNG3|CACNG5|CACNG6	0.00423502
Pancreatic secretion	KEGG PATHWAY	hsa04972	13	98	PNLIPRP1|ADCY4|CPA1|CD38|PLA2G5|RYR2|CHRM3|PRKCB|KCNQ1|PRSS1|ATP1A4|CLCA1|CFTR	0.00438957
Breast cancer	KEGG PATHWAY	hsa05224	17	147	TNFSF11|BRCA2|FGF9|ESR1|NOTCH4|WNT2|CDKN1A|HEYL|IGF1|WNT9B|CDK6|FGF8|FGF6|FLT4|FGF3|FGF2|FLG	0.00448017
Inflammatory bowel disease (IBD)	KEGG PATHWAY	hsa05321	10	65	TGFB2|IL17A|IL23A|TBX21|SMAD2|SMAD3|IL21|IFNGR2|IL1B|HLA-DQA2	0.00473207
Chemokine signaling pathway	KEGG PATHWAY	hsa04062	20	190	RASGRP2|CCL11|CCL1|ITK|PREX1|DOCK2|ADCY4|CCL8|PRKCB|GNG4|CXCR1|PIK3R5|CCL13|CCR5|CX3CL1|HCK|LYN|BCAR1|GNG11|JAK3	0.00568945
Tyrosine metabolism	KEGG PATHWAY	hsa00350	7	36	AOX1|AOC2|ALDH3B2|TPO|ALDH3A1|HGD|HPD	0.00573886
Amphetamine addiction	KEGG PATHWAY	hsa05031	10	68	GRIN2B|PRKCB|PPP1CC|CREB5|GRIA1|CAMK2A|GRIA4|GRIN3A|GRIN2A|SLC18A2	0.00626186
African trypanosomiasis	KEGG PATHWAY	hsa05143	7	37	IDO1|LAMA4|SELE|PRKCB|VCAM1|IL1B|APOA1	0.00652971
Osteoclast differentiation	KEGG PATHWAY	hsa04380	15	128	SIRPG|TNFSF11|SPI1|LILRB1|SIRPA|TGFBR1|SIRPB2|IFNGR2|SIRPB1|MITF|LCP2|IL1B|LILRA4|TGFB2|BLNK	0.0065579
Cushing syndrome	KEGG PATHWAY	hsa04934	17	155	ADCY4|CYP11A1|KCNA4|WNT2|CREB5|CAMK2A|KCNK2|KCNK3|MLL2|CDKN1A|WNT9B|CDK6|POMC|AGTR1|CRH|CRHR2|CYP11B1	0.00717873
Chemical carcinogenesis	KEGG PATHWAY	hsa05204	11	82	CYP3A43|CYP1A1|CYP1A2|PTGS2|ALDH3A1|GSTM5|SULT1A2|UGT2B15|ALDH3B2|UGT2B11|SULT2A1	0.00780939
Cocaine addiction	KEGG PATHWAY	hsa05030	8	49	GRIN2B|CREB5|DRD2|GRIN3A|GRIN2A|CDK5R1|SLC18A2|BDNF	0.00810173
Endocrine and other factor-regulated calcium reabsorption	KEGG PATHWAY	hsa04961	8	50	ESR1|PRKCB|KL|KLK1|ATP1A4|DNM3|SLC8A1|SLC8A2	0.00898738
Thyroid hormone synthesis	KEGG PATHWAY	hsa04918	10	74	ADCY4|IYD|PRKCB|TPO|CREB5|DUOX2|GPX3|ATP1A4|GPX5|TSHR	0.0104496
Fat digestion and absorption	KEGG PATHWAY	hsa04975	7	41	PNLIPRP1|CD36|PLA2G5|AGPAT2|ABCA1|SLC27A4|APOA1	0.0105191
Gastric cancer	KEGG PATHWAY	hsa05226	16	149	TGFBR1|CDH17|WNT2|CDKN1A|CDX2|TGFB2|SMAD2|SMAD3|WNT9B|FGF9|MUC2|FGF8|FGF6|TERT|FGF3|FGF2	0.0106072
Choline metabolism in cancer	KEGG PATHWAY	hsa05231	12	99	PDGFRB|PDGFRA|PRKCB|SLC44A4|SLC22A3|PLCG1|DGKI|SLC22A2|SLC5A7|PLA2G4C|PLA2G4F|DGKD	0.0112578
Human T-cell leukemia virus 1 infection	KEGG PATHWAY	hsa05166	21	219	ADCY4|TBPL2|TGFBR1|SPI1|NFATC4|BUB1B|CREB5|CCND2|TGFB2|SMAD2|SMAD3|STAT5A|ETS1|JAK3|CDKN1A|IL15|MAML2|CD40|TERT|SLC2A1|HLA-DQA2	0.0118611
Pertussis	KEGG PATHWAY	hsa05133	10	76	IL23A|C4BPA|C4BPB|IRF8|ITGA5|SERPING1|CFL2|C1S|PYCARD|IL1B	0.0122355
Gap junction	KEGG PATHWAY	hsa04540	11	88	ADCY4|PDGFRB|PDGFRA|TUBB6|PRKCB|DRD2|GJD2|CSNK1D|HTR2A|PRKG2|GRM1	0.0122593
Renin-angiotensin system	KEGG PATHWAY	hsa04614	5	23	KLK1|AGTR1|MRGPRD|ANPEP|MAS1	0.0127159
Cortisol synthesis and secretion	KEGG PATHWAY	hsa04927	9	65	ADCY4|CYP11A1|KCNA4|CREB5|KCNK2|KCNK3|POMC|CYP11B1|AGTR1	0.0129044
Type I diabetes mellitus	KEGG PATHWAY	hsa04940	7	43	PTPRN2|CD80|CD86|GAD2|PTPRN|IL1B|HLA-DQA2	0.0130701
Alcoholism	KEGG PATHWAY	hsa05034	18	180	GRIN2B|HDAC4|HDAC9|CREB5|DRD2|H2AFY|PKIA|GRIN3A|GNG4|GRIN2A|NPY|GNG11|SLC18A2|CRH|HIST1H4L|HIST1H4F|BDNF|PPP1CC	0.0131755
beta-Alanine metabolism	KEGG PATHWAY	hsa00410	6	33	ALDH3B2|AOC2|ALDH3A1|DPYS|ABAT|GAD2	0.0135053
Kaposi sarcoma-associated herpesvirus infection	KEGG PATHWAY	hsa05167	18	186	PTGS2|NFATC4|RCN1|PREX1|CDKN1A|EIF2AK2|GNG4|PLCG1|CD86|PIK3R5|VEGFA|CCR5|CDK6|HCK|CD200R1|LYN|FGF2|GNG11	0.0173949
Adipocytokine signaling pathway	KEGG PATHWAY	hsa04920	9	69	CPT1C|G6PC|CD36|LEPR|LEP|NPY|SLC2A1|POMC|PRKCQ	0.0177885
AMPK signaling pathway	KEGG PATHWAY	hsa04152	13	120	CPT1C|PPP2CB|CREB5|PPP2R3A|G6PC|CD36|PPP2R2B|LEP|LEPR|IGF1|FBP1|SCD5|CFTR	0.0187663
B cell receptor signaling pathway	KEGG PATHWAY	hsa04662	10	82	RASGRP3|PRKCB|LILRB1|CARD11|DAPP1|BCL10|LILRA4|LYN|MALT1|BLNK	0.0189785
Amoebiasis	KEGG PATHWAY	hsa05146	11	95	LAMA1|LAMA2|LAMA4|CD1D|CD1A|MUC2|SERPINB13|PRKCB|TGFB2|COL1A2|IL1B	0.0196316
Phenylalanine metabolism	KEGG PATHWAY	hsa00360	4	17	AOC2|ALDH3B2|ALDH3A1|HPD	0.0202168
HIF-1 signaling pathway	KEGG PATHWAY	hsa04066	12	109	IGF1|CDKN1A|PRKCB|CAMK2A|SLC2A1|PLCG1|VEGFA|IFNGR2|TF|ALDOC|LDHB|FLT1	0.0210838
Aldosterone-regulated sodium reabsorption	KEGG PATHWAY	hsa04960	6	37	KCNJ1|IGF1|SLC9A3R2|PRKCB|ATP1A4|SCNN1B	0.0212528
Intestinal immune network for IgA production	KEGG PATHWAY	hsa04672	7	49	CD80|CD40|IL15|MADCAM1|CD86|HLA-DQA2|TNFSF13B	0.0233437
Aldosterone synthesis and secretion	KEGG PATHWAY	hsa04925	11	98	ADCY4|CYP11A1|KCNK9|CREB5|PRKCB|CAMK2A|KCNK3|ATP1A4|POMC|CYP11B2|AGTR1	0.0236344
Glycerolipid metabolism	KEGG PATHWAY	hsa00561	8	61	PNLIPRP1|LIPC|LIPG|DGKI|AGPAT3|AGPAT2|AKR1B1|DGKD	0.0240477
Cholesterol metabolism	KEGG PATHWAY	hsa04979	7	50	LIPC|LIPG|CD36|PLTP|ABCA1|APOA1|LPA	0.0254776
Linoleic acid metabolism	KEGG PATHWAY	hsa00591	5	29	PLA2G4C|ALOX15|PLA2G5|PLA2G4F|CYP1A2	0.0280133
Hepatitis C	KEGG PATHWAY	hsa05160	15	155	CLDN10|PPP2CB|CLDN16|CLDN14|CLDN15|CLDN22|CDKN1A|EIF2AK2|CLDN25|PPP2R2B|CLDN8|CLDN9|CLDN11|CDK6|CLDN6	0.0281153
T cell receptor signaling pathway	KEGG PATHWAY	hsa04660	11	103	NCK1|CARD11|PRKCQ|PLCG1|CD247|CD8A|LCP2|PAK7|BCL10|MALT1|ITK	0.0315774
Salivary secretion	KEGG PATHWAY	hsa04970	10	90	ADCY4|CD38|ADRA1D|RYR3|PRKCB|CHRM3|LPO|ATP1A4|PRKG2|PRB2	0.0317523
Non-small cell lung cancer	KEGG PATHWAY	hsa05223	8	66	ALK|RASSF1|CDKN1A|PRKCB|STAT5A|PLCG1|JAK3|CDK6	0.0347698
Retinol metabolism	KEGG PATHWAY	hsa00830	8	67	AOX1|CYP1A2|CYP1A1|BCMO1|UGT2B15|UGT2B11|LRAT|ALDH1A2	0.0372475
Fc gamma R-mediated phagocytosis	KEGG PATHWAY	hsa04666	10	94	DOCK2|PRKCB|PLCG1|MARCKS|CFL2|PLA2G4C|HCK|LYN|PLA2G4F|GSN	0.0400022
Carbohydrate digestion and absorption	KEGG PATHWAY	hsa04973	6	44	MGA|SLC2A5|PRKCB|G6PC|SLC2A2|ATP1A4	0.0411059
Insulin resistance	KEGG PATHWAY	hsa04931	11	108	PPP1CC|CREB5|PRKCB|G6PC|SLC2A2|CD36|SLC2A1|PRKCQ|SLC27A4|SLC27A6|SLC27A3	0.041254
Renin secretion	KEGG PATHWAY	hsa04924	8	69	KCNJ2|ADORA1|PDE1C|ADCYAP1|PRKG2|EDN3|CLCA1|AGTR1	0.042552
Epithelial cell signaling in Helicobacter pylori infection	KEGG PATHWAY	hsa05120	8	70	ATP6V0C|CSK|JAM2|JAM3|PLCG1|CXCR1|GIT1|LYN	0.0453821
Caffeine metabolism	KEGG PATHWAY	hsa00232	2	5	CYP1A2|XDH	0.046117
Prostate cancer	KEGG PATHWAY	hsa05215	10	97	PDGFRB|PDGFRA|IGF1|TMPRSS2|PLAT|KLK3|CDKN1A|SRD5A2|CREB5|FLG	0.0470791
Glycerophospholipid metabolism	KEGG PATHWAY	hsa00564	10	97	PLA2G5|PCYT2|DGKI|AGPAT3|AGPAT2|ETNK1|PLA2G4C|ACHE|PLA2G4F|DGKD	0.0470791
Hepatocellular carcinoma	KEGG PATHWAY	hsa05225	15	168	TGFBR1|ACTL6B|WNT2|CDKN1A|PRKCB|GSTM5|SMAD2|SMAD3|PLCG1|WNT9B|CDK6|SMARCA2|TERT|TGFB2|TXNRD1	0.0486982
Drug metabolism - cytochrome P450	KEGG PATHWAY	hsa00982	8	72	FMO2|AOX1|CYP1A2|ALDH3B2|ALDH3A1|GSTM5|UGT2B15|UGT2B11	0.0514053
Vitamin digestion and absorption	KEGG PATHWAY	hsa04977	4	24	CUBN|LRAT|APOA1|SLC19A3	0.0522672
Hedgehog signaling pathway	KEGG PATHWAY	hsa04340	6	47	CCND2|IHH|EVC2|CSNK1D|CUL1|HHIP	0.0523051
Glycosaminoglycan biosynthesis - keratan sulfate	KEGG PATHWAY	hsa00533	3	14	CHST1|CHST2|CHST4	0.0529104
Relaxin signaling pathway	KEGG PATHWAY	hsa04926	12	130	ADCY4|TGFBR1|CREB5|GNG11|SMAD2|SMAD3|GNG4|COL1A2|VEGFC|VEGFA|EDNRB|MMP2	0.0601738
Pancreatic cancer	KEGG PATHWAY	hsa05212	8	75	TGFBR1|BRCA2|CDKN1A|TGFB2|SMAD2|SMAD3|VEGFA|CDK6	0.0613646
Glioma	KEGG PATHWAY	hsa05214	8	75	PDGFRB|PDGFRA|IGF1|CDKN1A|PRKCB|CAMK2A|PLCG1|CDK6	0.0613646
Cellular senescence	KEGG PATHWAY	hsa04218	14	160	TGFBR1|NFATC4|PPP1CC|CDKN1A|CCND2|TGFB2|SMAD2|SMAD3|IGFBP3|ETS1|CDK6|KIR2DL4|TRAF3IP2|GATA4	0.0627267
Metabolism of xenobiotics by cytochrome P450	KEGG PATHWAY	hsa00980	8	76	CYP1A1|CYP1A2|ALDH3B2|ALDH3A1|GSTM5|UGT2B15|UGT2B11|SULT2A1	0.0649343
FoxO signaling pathway	KEGG PATHWAY	hsa04068	12	132	TGFBR1|IGF1|G6PC|S1PR1|CCND2|CPD|TGFB2|SMAD2|SMAD3|GRM1|CDKN1A|FOXG1	0.0654585
Sphingolipid signaling pathway	KEGG PATHWAY	hsa04071	11	119	DEGS1|PPP2CB|FCER1A|ADORA1|S1PR1|PPP2R3A|PRKCB|PPP2R2B|GNA12|GNA13|SPP2	0.0693039
Th1 and Th2 cell differentiation	KEGG PATHWAY	hsa04658	9	92	TBX21|PLCG1|RUNX3|STAT5A|CD247|JAK3|IFNGR2|PRKCQ|HLA-DQA2	0.0733278
Human cytomegalovirus infection	KEGG PATHWAY	hsa05163	18	225	ADCY4|PTGS2|PDGFRA|NFATC4|CREB5|PRKCB|ARHGEF12|GNG11|GNG4|GNA12|CCR5|CDK6|CX3CL1|VEGFA|IL1B|BCAR1|CDKN1A|GNA13	0.0740462
EGFR tyrosine kinase inhibitor resistance	KEGG PATHWAY	hsa01521	8	79	PDGFRB|PDGFRA|IGF1|PRKCB|PLCG1|VEGFA|NRG1|FGF2	0.0764009
Butanoate metabolism	KEGG PATHWAY	hsa00650	4	28	HMGCL|ALDH5A1|GAD2|ABAT	0.0783743
Mineral absorption	KEGG PATHWAY	hsa04978	6	53	TF|ATP1A4|SLC8A1|SLC26A9|SLC8A2|SLC30A1	0.0797701
Autoimmune thyroid disease	KEGG PATHWAY	hsa05320	6	53	TPO|CD80|CD40|CD86|TSHR|HLA-DQA2	0.0797701
Long-term potentiation	KEGG PATHWAY	hsa04720	7	67	PRKCB|PPP1CC|GRIA1|CAMK2A|GRIN2B|GRIN2A|GRM1	0.0833615
Graft-versus-host disease	KEGG PATHWAY	hsa05332	5	41	CD80|IL1B|KIR3DL2|HLA-DQA2|CD86	0.084199
Hippo signaling pathway - multiple species	KEGG PATHWAY	hsa04392	4	29	RASSF1|WWTR1|RASSF2|RASSF6	0.0857487
Glycolysis / Gluconeogenesis	KEGG PATHWAY	hsa00010	7	68	ALDH3B2|ALDH3A1|G6PC|GAPDHS|FBP1|ALDOC|LDHB	0.0881086
Regulation of lipolysis in adipocytes	KEGG PATHWAY	hsa04923	6	55	ADCY4|PTGS2|ADORA1|NPY|PRKG2|TSHR	0.0904218
Tryptophan metabolism	KEGG PATHWAY	hsa00380	5	42	AOX1|CYP1A2|IDO1|HAAO|CYP1A1	0.0904664
Viral carcinogenesis	KEGG PATHWAY	hsa05203	16	201	JAK3|TBPL2|CCND2|CDK6|HDAC9|CREB5|EIF2AK2|HIST1H4L|STAT5A|HDAC4|CCR5|SND1|LYN|HIST1H4F|CDKN1A|GSN	0.0908411
Nicotinate and nicotinamide metabolism	KEGG PATHWAY	hsa00760	4	30	CD38|AOX1|NNT|NT5C1A	0.0934468
Prolactin signaling pathway	KEGG PATHWAY	hsa04917	7	70	LHCGR|TNFSF11|ESR1|PRLR|CCND2|SLC2A2|STAT5A	0.0980506
Toxoplasmosis	KEGG PATHWAY	hsa05145	10	113	LAMA1|LAMA2|LAMA4|BIRC8|TGFB2|CD40|PIK3R5|CCR5|IFNGR2|HLA-DQA2	0.0987279
ErbB signaling pathway	KEGG PATHWAY	hsa04012	8	85	NCK1|CDKN1A|PRKCB|CAMK2A|PLCG1|STAT5A|NRG1|PAK7	0.102741
Viral protein interaction with cytokine and cytokine receptor	KEGG PATHWAY	hsa04061	9	100	CCL11|CCL1|CCL8|IL20|CXCR1|CCL13|CCR5|TNFRSF10D|CX3CL1	0.10548
p53 signaling pathway	KEGG PATHWAY	hsa04115	7	72	IGF1|CDKN1A|CCND2|TP73|IGFBP3|PRG3|CDK6	0.108582
Necroptosis	KEGG PATHWAY	hsa04217	13	162	HMGB1|EIF2AK2|CAMK2A|H2AFY|STAT5A|JAK3|IFNGR2|PLA2G4C|PYCARD|IL1B|RIPK3|PLA2G4F|ALOX15	0.113485
VEGF signaling pathway	KEGG PATHWAY	hsa04370	6	59	PTGS2|PRKCB|PLCG1|VEGFA|PLA2G4C|PLA2G4F	0.113899
Type II diabetes mellitus	KEGG PATHWAY	hsa04930	5	46	CACNA1A|CACNA1B|CACNA1E|SLC2A2|PDX1	0.117826
Chagas disease (American trypanosomiasis)	KEGG PATHWAY	hsa05142	9	103	TGFBR1|PPP2CB|TGFB2|SMAD2|PPP2R2B|CD247|IFNGR2|IL1B|SMAD3	0.119304
Thyroid hormone signaling pathway	KEGG PATHWAY	hsa04919	10	119	RCN1|ESR1|NOTCH4|PRKCB|SLC2A1|PLCG1|ATP1A4|MED16|DIO3|GATA4	0.124293
Pentose and glucuronate interconversions	KEGG PATHWAY	hsa00040	4	34	UGT2B15|AKR1B1|UGT2B11|KL	0.127276
Chronic myeloid leukemia	KEGG PATHWAY	hsa05220	7	76	TGFBR1|CDKN1A|TGFB2|SMAD3|STAT5A|RUNX1|CDK6	0.131358
mRNA surveillance pathway	KEGG PATHWAY	hsa03015	8	91	PPP2CB|GSPT1|SMG6|PPP1CC|PPP2R3A|PPP2R2B|PABPC4L|FIP1L1	0.133511
Taurine and hypotaurine metabolism	KEGG PATHWAY	hsa00430	2	11	CDO1|GAD2	0.140166
Cysteine and methionine metabolism	KEGG PATHWAY	hsa00270	5	49	AHCYL2|CDO1|BCAT1|LDHB|MAT1A	0.140603
Estrogen signaling pathway	KEGG PATHWAY	hsa04915	11	138	ADCY4|ESR1|CREB5|TFF1|OPRM1|POMC|GABBR2|MMP2|GRM1|KRT19|KRT18	0.141294
Mannose type O-glycan biosynthesis	KEGG PATHWAY	hsa00515	3	23	B3GAT2|B3GAT1|FUT9	0.145038
Alanine, aspartate and glutamate metabolism	KEGG PATHWAY	hsa00250	4	36	ALDH5A1|NAT8L|GAD2|ABAT	0.145855
Starch and sucrose metabolism	KEGG PATHWAY	hsa00500	4	36	MGA|GBA3|G6PC|GBE1	0.145855
Fluid shear stress and atherosclerosis	KEGG PATHWAY	hsa05418	11	139	ACVR2A|SELE|GSTM5|CAV2|PLAT|BMPR1B|VEGFA|VCAM1|IL1B|MMP2|CDH5	0.1459
Alzheimer disease	KEGG PATHWAY	hsa05010	13	171	BACE2|RYR3|GRIN2B|COX4I2|NDUFS2|GRIN2A|CDK5R1|SNCA|COX7A1|COX6B2|IL1B|ERN1|ATP5G2	0.148824
Primary immunodeficiency	KEGG PATHWAY	hsa05340	4	37	CD8A|JAK3|CD40|BLNK	0.155517
Amyotrophic lateral sclerosis (ALS)	KEGG PATHWAY	hsa05014	5	51	NEFM|GRIN2B|GRIN2A|GRIA1|NEFH	0.15677
Glycosaminoglycan biosynthesis - heparan sulfate / heparin	KEGG PATHWAY	hsa00534	3	24	NDST1|EXTL3|HS3ST2	0.157341
Parkinson disease	KEGG PATHWAY	hsa05012	11	142	SNCAIP|COX4I2|COX7A1|DRD2|UBA7|NDUFS2|SNCA|SLC18A2|COX6B2|UCHL1|ATP5G2	0.160177
Allograft rejection	KEGG PATHWAY	hsa05330	4	38	CD80|CD40|HLA-DQA2|CD86	0.16541
TNF signaling pathway	KEGG PATHWAY	hsa04668	9	112	PTGS2|SELE|CREB5|IL15|RIPK3|VCAM1|VEGFC|CX3CL1|IL1B	0.166237
alpha-Linolenic acid metabolism	KEGG PATHWAY	hsa00592	3	25	PLA2G4C|PLA2G5|PLA2G4F	0.169949
Fc epsilon RI signaling pathway	KEGG PATHWAY	hsa04664	6	68	FCER1A|PLCG1|PLA2G4C|LCP2|LYN|PLA2G4F	0.176413
Endocytosis	KEGG PATHWAY	hsa04144	17	244	CAPZB|TGFBR1|FAM125B|RAB31|DNAJC6|PDGFRA|SMAD2|PARD6B|SMAD3|CXCR1|GIT1|DNM3|IQSEC1|SNX32|CAV2|FOLR1|CCR5	0.182902
Renal cell carcinoma	KEGG PATHWAY	hsa05211	6	69	TGFB2|CDKN1A|SLC2A1|ETS1|VEGFA|PAK7	0.184092
Central carbon metabolism in cancer	KEGG PATHWAY	hsa05230	6	69	PDGFRB|PDGFRA|SLC2A2|SLC2A1|LDHB|FLG	0.184092
Tuberculosis	KEGG PATHWAY	hsa05152	13	179	CD74|ATP6V0C|TGFB2|ARHGEF12|CCK|IL23A|CAMK2A|NFYC|HLA-DQA2|IFNGR2|IL1B|BCL10|MALT1	0.184574
Melanogenesis	KEGG PATHWAY	hsa04916	8	101	ADCY4|WNT2|PRKCB|CAMK2A|WNT9B|POMC|MITF|EDNRB	0.193747
Glycosphingolipid biosynthesis - lacto and neolacto series	KEGG PATHWAY	hsa00601	3	27	FUT2|FUT9|ABO	0.195969
Systemic lupus erythematosus	KEGG PATHWAY	hsa05322	10	133	HIST1H4F|HIST1H4L|CD80|CD40|H2AFY|GRIN2B|GRIN2A|C1S|CD86|HLA-DQA2	0.196203
Bladder cancer	KEGG PATHWAY	hsa05219	4	41	RASSF1|VEGFA|CDKN1A|MMP2	0.196339
Adherens junction	KEGG PATHWAY	hsa04520	6	72	TGFBR1|SMAD2|SMAD3|PVRL4|SORBS1|FLG	0.207879
Fatty acid metabolism	KEGG PATHWAY	hsa01212	5	57	ACADL|CPT1C|CPT2|ELOVL2|SCD5	0.209333
C-type lectin receptor signaling pathway	KEGG PATHWAY	hsa04625	8	104	PTGS2|ARHGEF12|NFATC4|IL23A|PYCARD|IL1B|BCL10|MALT1	0.213719
Glycosphingolipid biosynthesis - ganglio series	KEGG PATHWAY	hsa00604	2	15	ST8SIA5|ST6GALNAC3	0.214507
Glycosphingolipid biosynthesis - globo and isoglobo series	KEGG PATHWAY	hsa00603	2	15	FUT2|FUT9	0.214507
Leishmaniasis	KEGG PATHWAY	hsa05140	6	74	PTGS2|TGFB2|PRKCB|IFNGR2|IL1B|HLA-DQA2	0.224309
Bacterial invasion of epithelial cells	KEGG PATHWAY	hsa05100	6	74	ARHGAP10|CAV2|ITGA5|SEPT9|DNM3|BCAR1	0.224309
Glucagon signaling pathway	KEGG PATHWAY	hsa04922	8	106	CPT1C|CREB5|G6PC|CAMK2A|SLC2A1|SLC2A2|FBP1|LDHB	0.227452
Pentose phosphate pathway	KEGG PATHWAY	hsa00030	3	30	ALDOC|FBP1|H6PD	0.236582
Cell cycle	KEGG PATHWAY	hsa04110	9	124	TGFB2|BUB1B|CDKN1A|CCND2|SMAD2|SMAD3|MCM7|CDK6|CUL1	0.239909
ABC transporters	KEGG PATHWAY	hsa02010	4	45	ABCA1|CFTR|ABCA9|ABCC11	0.239976
Antigen processing and presentation	KEGG PATHWAY	hsa04612	6	77	CD74|NFYC|KIR2DL4|CD8A|KIR3DL2|HLA-DQA2	0.249698
Small cell lung cancer	KEGG PATHWAY	hsa05222	7	93	LAMA1|LAMA2|LAMA4|PTGS2|CDKN1A|BIRC8|CDK6	0.249858
Circadian rhythm	KEGG PATHWAY	hsa04710	3	31	CSNK1D|PER1|CUL1	0.250434
Galactose metabolism	KEGG PATHWAY	hsa00052	3	31	MGA|G6PC|AKR1B1	0.250434
Mucin type O-glycan biosynthesis	KEGG PATHWAY	hsa00512	3	31	GALNT9|WBSCR17|GALNT13	0.250434
Nitrogen metabolism	KEGG PATHWAY	hsa00910	2	17	CA3|CA14	0.252935
Ether lipid metabolism	KEGG PATHWAY	hsa00565	4	47	PLA2G4C|PLA2G5|ENPP2|PLA2G4F	0.262574
Oocyte meiosis	KEGG PATHWAY	hsa04114	9	128	ADCY4|IGF1|PPP1CC|MOS|CPEB4|PPP2CB|CPEB1|CAMK2A|CUL1	0.266707
Drug metabolism - other enzymes	KEGG PATHWAY	hsa00983	6	79	UMPS|GSTM5|XDH|DPYS|UGT2B15|UGT2B11	0.267054
2-Oxocarboxylic acid metabolism	KEGG PATHWAY	hsa01210	2	18	NAGS|BCAT1	0.272228
Valine, leucine and isoleucine degradation	KEGG PATHWAY	hsa00280	4	48	HMGCL|AOX1|ABAT|BCAT1	0.274021
Hepatitis B	KEGG PATHWAY	hsa05161	11	163	TGFBR1|PRKCB|NFATC4|CREB5|HSPG2|TGFB2|SMAD2|SMAD3|STAT5A|JAK3|CDKN1A	0.276798
Fructose and mannose metabolism	KEGG PATHWAY	hsa00051	3	33	ALDOC|AKR1B1|FBP1	0.278457
Base excision repair	KEGG PATHWAY	hsa03410	3	33	MPG|HMGB1|POLD2	0.278457
Purine metabolism	KEGG PATHWAY	hsa00230	9	130	ADCY4|GUCY2D|PDE1C|XDH|PDE9A|NT5C1A|STAR|PDE4B|PDE4D	0.280436
Pantothenate and CoA biosynthesis	KEGG PATHWAY	hsa00770	2	19	DPYS|BCAT1	0.291499
Propanoate metabolism	KEGG PATHWAY	hsa00640	3	34	ECHDC1|ABAT|LDHB	0.292581
Vibrio cholerae infection	KEGG PATHWAY	hsa05110	4	50	ATP6V0C|PLCG1|CFTR|KCNQ1	0.297144
Phosphonate and phosphinate metabolism	KEGG PATHWAY	hsa00440	1	6	PCYT2	0.307163
Vitamin B6 metabolism	KEGG PATHWAY	hsa00750	1	6	AOX1	0.307163
One carbon pool by folate	KEGG PATHWAY	hsa00670	2	20	ALDH1L2|ALDH1L1	0.310701
Colorectal cancer	KEGG PATHWAY	hsa05210	6	86	TGFBR1|CDKN1A|TGFB2|SMAD2|DCC|SMAD3	0.329766
Other types of O-glycan biosynthesis	KEGG PATHWAY	hsa00514	2	22	LFNG|ST6GAL2	0.348728
Pathogenic Escherichia coli infection	KEGG PATHWAY	hsa05130	4	55	TUBB6|NCK1|EZR|KRT18	0.355714
Huntington disease	KEGG PATHWAY	hsa05016	12	193	DNAH14|TBPL2|DNAH10|DNAH5|CREB5|GRIN2B|COX4I2|NDUFS2|COX7A1|COX6B2|BDNF|ATP5G2	0.355767
PD-L1 expression and PD-1 checkpoint pathway in cancer	KEGG PATHWAY	hsa05235	6	89	BATF|ALK|PLCG1|CD247|IFNGR2|PRKCQ	0.357235
Bile secretion	KEGG PATHWAY	hsa04976	5	72	ADCY4|ATP1A4|CFTR|SLC2A1|SULT2A1	0.35752
Glutathione metabolism	KEGG PATHWAY	hsa00480	4	56	GPX3|GPX5|GSTM5|ANPEP	0.367465
Histidine metabolism	KEGG PATHWAY	hsa00340	2	23	ALDH3B2|ALDH3A1	0.367481
Ferroptosis	KEGG PATHWAY	hsa04216	3	40	SLC3A2|TF|ALOX15	0.377562
Homologous recombination	KEGG PATHWAY	hsa03440	3	41	POLD2|BRCA2|BARD1	0.391591
IL-17 signaling pathway	KEGG PATHWAY	hsa04657	6	93	CCL11|IL17A|PTGS2|S100A8|TRAF3IP2|IL1B	0.394052
GnRH signaling pathway	KEGG PATHWAY	hsa04912	6	93	ADCY4|PRKCB|CAMK2A|PLA2G4C|MMP2|PLA2G4F	0.394052
Glycosylphosphatidylinositol (GPI)-anchor biosynthesis	KEGG PATHWAY	hsa00563	2	25	PIGY|GPLD1	0.404312
Porphyrin and chlorophyll metabolism	KEGG PATHWAY	hsa00860	3	42	UGT2B15|FXN|UGT2B11	0.405537
Epstein-Barr virus infection	KEGG PATHWAY	hsa05169	12	201	CCND2|CDKN1A|EIF2AK2|CD40|VIM|RUNX3|CD247|JAK3|CDK6|LYN|HLA-DQA2|BLNK	0.40566
Natural killer cell mediated cytotoxicity	KEGG PATHWAY	hsa04650	8	131	CD48|PRKCB|PLCG1|CD247|IFNGR2|KIR2DL4|LCP2|KIR3DL2	0.416337
Fatty acid degradation	KEGG PATHWAY	hsa00071	3	44	CPT1C|CPT2|ACADL	0.433128
Sulfur metabolism	KEGG PATHWAY	hsa00920	1	10	SELENBP1	0.43824
Synthesis and degradation of ketone bodies	KEGG PATHWAY	hsa00072	1	10	HMGCL	0.43824
Endocrine resistance	KEGG PATHWAY	hsa01522	6	98	ADCY4|IGF1|ESR1|NOTCH4|CDKN1A|MMP2	0.439923
Biosynthesis of unsaturated fatty acids	KEGG PATHWAY	hsa01040	2	27	ELOVL2|SCD5	0.440081
Collecting duct acid secretion	KEGG PATHWAY	hsa04966	2	27	ATP6V0C|ATP4B	0.440081
Ascorbate and aldarate metabolism	KEGG PATHWAY	hsa00053	2	27	UGT2B15|UGT2B11	0.440081
Basal cell carcinoma	KEGG PATHWAY	hsa05217	4	63	WNT2|CDKN1A|WNT9B|HHIP	0.448823
Cytosolic DNA-sensing pathway	KEGG PATHWAY	hsa04623	4	63	PYCARD|IL1B|RIPK3|AIM2	0.448823
Phosphatidylinositol signaling system	KEGG PATHWAY	hsa04070	6	99	INPP5B|PRKCB|PLCG1|DGKI|SYNJ2|DGKD	0.449029
Neurotrophin signaling pathway	KEGG PATHWAY	hsa04722	7	119	NTF3|CAMK2A|TP73|PLCG1|CCK|ZNF274|BDNF	0.465049
Ubiquinone and other terpenoid-quinone biosynthesis	KEGG PATHWAY	hsa00130	1	11	HPD	0.466936
Salmonella infection	KEGG PATHWAY	hsa05132	5	83	SCT|IL1B|PFN3|IFNGR2|PYCARD	0.469309
Sphingolipid metabolism	KEGG PATHWAY	hsa00600	3	47	DEGS1|SPP2|B4GALT6	0.473573
Thermogenesis	KEGG PATHWAY	hsa04714	13	231	ADCY4|CPT1C|CREB5|CPT2|COX4I2|NDUFS2|ACTL6B|PRKG2|COX7A1|COX6B2|SMARCA2|FLG|ATP5G2	0.478084
Yersinia infection	KEGG PATHWAY	hsa05135	7	121	ARHGEF12|ITGA5|PLCG1|PYCARD|LCP2|IL1B|BCAR1	0.481589
Acute myeloid leukemia	KEGG PATHWAY	hsa05221	4	66	SPI1|STAT5A|RUNX1|ZBTB16	0.482728
Herpes simplex virus 1 infection	KEGG PATHWAY	hsa05168	27	492	CD74|ZNF334|ZNF177|ITGA5|IFNGR2|IL1B|ZNF814|ZNF879|ZNF454|ZIK1|ZNF267|ZNF471|ZNF662|ZNF283|ZNF667|ZNF208|ZNF300|F11|PPP1CC|ZNF154|ZNF735|ZNF716|EIF2AK2|ZFP57|ZNF132|HLA-DQA2|ZNF560	0.488643
NOD-like receptor signaling pathway	KEGG PATHWAY	hsa04621	10	178	TANK|IFI16|AIM2|RIPK3|TRPC7|CCK|CASR|PYCARD|IL1B|P2RX7	0.493458
Staphylococcus aureus infection	KEGG PATHWAY	hsa05150	4	68	C1S|FGG|HLA-DQA2|CFI	0.504863
Antifolate resistance	KEGG PATHWAY	hsa01523	2	31	IL1B|FOLR1	0.50786
Autophagy - animal	KEGG PATHWAY	hsa04140	7	128	AMBRA1|PPP2CB|DEPDC6|PRKCQ|PRAP1|HMGB1|ERN1	0.538187
Influenza A	KEGG PATHWAY	hsa05164	9	167	PRKCB|IFNGR2|TMPRSS2|EIF2AK2|PRSS1|CDK6|PYCARD|IL1B|HLA-DQA2	0.546478
Non-alcoholic fatty liver disease (NAFLD)	KEGG PATHWAY	hsa04932	8	149	LEPR|LEP|COX4I2|NDUFS2|COX7A1|COX6B2|IL1B|ERN1	0.553512
Legionellosis	KEGG PATHWAY	hsa05134	3	55	PYCARD|IL1B|EEF1A2	0.574117
Phagosome	KEGG PATHWAY	hsa04145	8	152	ATP6V0C|MARCO|TUBB6|THBS4|THBS2|ITGA5|CD36|HLA-DQA2	0.575151
Oxidative phosphorylation	KEGG PATHWAY	hsa00190	7	133	ATP6V0C|ATP4B|COX4I2|NDUFS2|COX7A1|COX6B2|ATP5G2	0.577021
Biosynthesis of amino acids	KEGG PATHWAY	hsa01230	4	75	ALDOC|MAT1A|BCAT1|NAGS	0.578677
DNA replication	KEGG PATHWAY	hsa03030	2	36	MCM7|POLD2	0.584671
Human immunodeficiency virus 1 infection	KEGG PATHWAY	hsa05170	11	212	NFATC4|PRKCB|PLCG1|APOBEC3C|GNG11|GNG4|CD247|CCR5|PAK7|CUL1|CFL2	0.590182
Pyrimidine metabolism	KEGG PATHWAY	hsa00240	3	57	DPYS|UMPS|NT5C1A	0.59731
Thyroid cancer	KEGG PATHWAY	hsa05216	2	37	CDKN1A|TPM3	0.598926
Insulin signaling pathway	KEGG PATHWAY	hsa04910	7	137	PPP1CC|G6PC|SORBS1|PRKAR1A|PRKAR1B|TRIP10|FBP1	0.60692
Ubiquitin mediated proteolysis	KEGG PATHWAY	hsa04120	7	137	UBE4B|WWP2|BIRC8|UBA7|RHOBTB2|RHOBTB1|CUL1	0.60692
Selenocompound metabolism	KEGG PATHWAY	hsa00450	1	17	TXNRD1	0.61083
Primary bile acid biosynthesis	KEGG PATHWAY	hsa00120	1	17	AKR1C4	0.61083
Measles	KEGG PATHWAY	hsa05162	7	138	CCND2|EIF2AK2|TP73|STAT5A|JAK3|CDK6|IL1B	0.614218
Progesterone-mediated oocyte maturation	KEGG PATHWAY	hsa04914	5	99	MOS|CPEB4|ADCY4|CPEB1|IGF1	0.618215
Pyruvate metabolism	KEGG PATHWAY	hsa00620	2	39	ME3|LDHB	0.626322
Steroid biosynthesis	KEGG PATHWAY	hsa00100	1	19	CYP24A1	0.649581
Glycosaminoglycan degradation	KEGG PATHWAY	hsa00531	1	19	HYAL2	0.649581
Longevity regulating pathway - multiple species	KEGG PATHWAY	hsa04213	3	62	ADCY4|FOXA2|IGF1	0.651567
Arginine biosynthesis	KEGG PATHWAY	hsa00220	1	21	NAGS	0.684475
Vasopressin-regulated water reabsorption	KEGG PATHWAY	hsa04962	2	44	CREB5|DLC1	0.688401
Basal transcription factors	KEGG PATHWAY	hsa03022	2	45	TBPL2|MNAT1	0.699746
Longevity regulating pathway	KEGG PATHWAY	hsa04211	4	89	ADCY4|CREB5|IGF1|KL	0.705408
Shigellosis	KEGG PATHWAY	hsa05131	3	68	PFN3|ITGA5|CCK	0.709498
mTOR signaling pathway	KEGG PATHWAY	hsa04150	7	153	IGF1|SLC3A2|WNT2|PRKCB|DEPDC6|WNT9B|GRB10	0.71421
Proximal tubule bicarbonate reclamation	KEGG PATHWAY	hsa04964	1	23	ATP1A4	0.715896
Mismatch repair	KEGG PATHWAY	hsa03430	1	23	POLD2	0.715896
Nucleotide excision repair	KEGG PATHWAY	hsa03420	2	47	MNAT1|POLD2	0.721407
Amino sugar and nucleotide sugar metabolism	KEGG PATHWAY	hsa00520	2	48	UAP1|GNE	0.731733
Notch signaling pathway	KEGG PATHWAY	hsa04330	2	48	NOTCH4|LFNG	0.731733
N-Glycan biosynthesis	KEGG PATHWAY	hsa00510	2	50	MGAT1|ST6GAL2	0.75141
Arginine and proline metabolism	KEGG PATHWAY	hsa00330	2	50	P4HA3|ADC	0.75141
Carbon metabolism	KEGG PATHWAY	hsa01200	5	117	ME3|HAO1|ALDOC|FBP1|H6PD	0.752217
Folate biosynthesis	KEGG PATHWAY	hsa00790	1	26	AKR1B1	0.757261
Inositol phosphate metabolism	KEGG PATHWAY	hsa00562	3	74	PLCG1|INPP5B|SYNJ2	0.759721
Fatty acid elongation	KEGG PATHWAY	hsa00062	1	27	ELOVL2	0.769665
Phototransduction	KEGG PATHWAY	hsa04744	1	28	GUCY2D	0.781436
RNA degradation	KEGG PATHWAY	hsa03018	3	79	BTG3|DIS3L|PABPC4L	0.795992
Glyoxylate and dicarboxylate metabolism	KEGG PATHWAY	hsa00630	1	30	HAO1	0.803205
Toll-like receptor signaling pathway	KEGG PATHWAY	hsa04620	4	104	CD80|IL1B|CD40|CD86	0.807783
Peroxisome	KEGG PATHWAY	hsa04146	3	83	HMGCL|HAO1|XDH	0.82161
Autophagy - other	KEGG PATHWAY	hsa04136	1	32	PPP2CB	0.822806
Lysine degradation	KEGG PATHWAY	hsa00310	2	59	NSD1|MLL2	0.825206
Apoptosis - multiple species	KEGG PATHWAY	hsa04215	1	33	BIRC8	0.831863
SNARE interactions in vesicular transport	KEGG PATHWAY	hsa04130	1	34	GOSR1	0.840456
Prion diseases	KEGG PATHWAY	hsa05020	1	35	IL1B	0.848611
Mitophagy - animal	KEGG PATHWAY	hsa04137	2	65	MITF|AMBRA1	0.862802
RNA transport	KEGG PATHWAY	hsa03013	6	165	POM121L2|CYFIP2|NAT1|PABPC4L|EIF4G1|EEF1A2	0.874209
Protein processing in endoplasmic reticulum	KEGG PATHWAY	hsa04141	6	165	UBE4B|DNAJC5B|EIF2AK2|CUL1|SEC31B|ERN1	0.874209
Glycine, serine and threonine metabolism	KEGG PATHWAY	hsa00260	1	40	AOC2	0.883544
RIG-I-like receptor signaling pathway	KEGG PATHWAY	hsa04622	2	70	TANK|TBKBP1	0.888303
Platinum drug resistance	KEGG PATHWAY	hsa01524	2	73	CDKN1A|GSTM5	0.901417
Apoptosis	KEGG PATHWAY	hsa04210	4	136	CSF2RB|SPTA1|MCL1|ERN1	0.931121
Fanconi anemia pathway	KEGG PATHWAY	hsa03460	1	54	BRCA2	0.944144
Endometrial cancer	KEGG PATHWAY	hsa05213	1	58	CDKN1A	0.954723
Ribosome biogenesis in eukaryotes	KEGG PATHWAY	hsa03008	2	105	RCL1|RBM28	0.975354
Lysosome	KEGG PATHWAY	hsa04142	2	123	ATP6V0C|CTSE	0.989056
Spliceosome	KEGG PATHWAY	hsa03040	2	135	SNRPF|DHX16	0.993689
Ribosome	KEGG PATHWAY	hsa03010	1	153	RPL22	0.999693

## Sheet: Luminal B_KEGG
Luminal B_KEGG pathway
Term	Database	ID	Input number	Background number	Input	P-Value
Olfactory transduction	KEGG PATHWAY	hsa04740	194	448	OR52B2|OR6C74|OR52B6|OR52B4|OR5I1|OR10C1|OR14A16|OR2D2|OR2D3|OR2T6|OR10K1|OR51F2|OR10K2|OR9A4|OR1A1|OR12D2|OR12D3|OR52J3|OR5AC2|OR6M1|OR52R1|OR5AK2|OR7D2|OR10S1|OR51A7|OR7D4|OR51E1|OR2G3|OR10T2|CAMK2A|OR2T8|OR1A2|OR2T4|OR2T5|OR2T3|OR2T1|OR9Q2|OR13C3|OR52K1|OR6T1|OR13C8|OR11L1|OR5A2|OR5AS1|OR6F1|OR52K2|OR1B1|OR10V1|OR5D18|OR2B11|OR56A3|OR4C15|OR2W1|OR5D14|OR2W5|OR5D16|OR4F6|OR4D10|OR4D11|PRKG1|PRK…	1.11e-78
Neuroactive ligand-receptor interaction	KEGG PATHWAY	hsa04080	110	338	GHSR|RXFP3|ADRA2B|GLP1R|EDN3|FPR1|PTH2R|CTSG|HTR4|NMU|ADRA1A|GALR2|GALR1|NMBR|NPY|HCRTR1|HCRTR2|HTR5A|GHRHR|GABRG3|GABRG2|NTSR2|GRIA4|NTSR1|CALCR|PTGDR|EDNRB|LHCGR|PRLR|GRM8|HRH3|GRM5|GRM6|GRM7|GRM1|GRM3|MC3R|MTNR1B|MTNR1A|TACR3|APLNR|SST|NPBWR2|CRH|SCTR|PTGFR|ADCYAP1|GABRA5|GABRA4|GABRA6|GABRA1|CNR1|GRIK5|S1PR1|GPR83|PENK|KISS1|GRID1|GRID2|LEPR|NPY2R|MAS1|POMC|GABRB1|GABRB2|GABRB3|GRIN1|F2|TAAR6…	1.37e-35
PI3K-Akt signaling pathway	KEGG PATHWAY	hsa04151	64	354	ITGA8|JAK3|PDGFRA|PPP2CB|FGF9|PDGFA|ITGA4|NGF|NTRK1|ITGB3|AKT1|LAMA3|MCL1|COL9A1|BDNF|FLT4|FLG|FLT1|PRLR|THBS4|THBS2|FGF19|NTRK2|COL29A1|PIK3R5|RELN|FGF10|FGF17|MAGI2|LAMA1|LAMA2|NTF3|IL2RB|ITGB6|COMP|CREB5|EFNA3|CHRM2|PPP2R2B|VEGFA|PDGFRB|VEGFC|FGF8|FGF6|FGF5|FGF4|FGF3|EPOR|TCL1A|SGK2|SGK1|CSH1|CCND2|G6PC|KIT|GNG4|COL1A2|EREG|CDK6|LPAR3|LPAR5|COL6A2|FGF23|COL6A6	5.56e-11
Pathways in cancer	KEGG PATHWAY	hsa05200	81	530	RASGRP2|WNT3A|PDGFRA|FGF9|IL23A|LAMA1|RASSF1|TGFB2|NTRK1|AKT1|LAMA3|RUNX1T1|MITF|EDNRB|FZD10|FLG|RARA|PDGFA|CXCL12|CCNA1|MECOM|WNT10A|BMP4|BIRC8|DCC|IL2RB|FGF19|ETS1|JAK3|TERT|FGF17|WNT2B|TCF4|LAMA2|LPAR5|ARHGEF12|FLT4|IL5RA|SPI1|PRKCB|CAMK2A|IL12B|FZD2|KLK3|RBP3|PTGS2|PDGFRB|VEGFC|FGF8|TCF7|FGF6|FGF5|FGF4|FGF3|RASGRP3|CTNNA2|ALK|EPOR|SHH|F2|FGF10|VEGFA|BMP2|ESR1|WNT3|WNT2|WNT1|CCND2|ADCY8|GSTM5|…	2.73e-10
Rap1 signaling pathway	KEGG PATHWAY	hsa04015	45	210	RASGRP2|RASGRP3|PDGFRA|APBB1IP|FGF9|PDGFRB|NGF|RAPGEF4|AKT1|PLCE1|FGF6|FLT4|FLG|FLT1|CNR1|FGF4|BCAR1|PARD6B|FGF19|GRIN2A|MAGI2|GRIN1|FGF10|FGF17|PDGFA|ITGB3|FPR1|PRKCB|EFNA3|PRKCZ|VEGFA|VEGFC|FGF8|LCP2|FGF5|P2RY1|FGF3|ADCY8|KIT|GRIN2B|PFN3|F2RL3|LPAR3|FGF23|LPAR5	4.01e-10
Cell adhesion molecules (CAMs)	KEGG PATHWAY	hsa04514	36	146	ITGA8|CLDN10|CLDN11|CLDN16|CLDN17|VCAN|CD34|CNTN2|TIGIT|CNTN1|CDH5|NTNG1|NTNG2|CLDN8|MADCAM1|CLDN4|CADM3|CLDN6|PDCD1|NLGN2|JAM2|NLGN1|CLDN22|CD40|CLDN25|VCAM1|CD8A|CD8B|SELE|NRXN3|NRXN1|CDH4|ITGA4|CNTNAP2|MAG|HLA-DQA2	9.15e-10
Calcium signaling pathway	KEGG PATHWAY	hsa04020	42	193	CD38|HTR5A|PDGFRA|PDGFRB|STIM2|NTSR1|CACNA1B|PLCE1|EDNRB|PTGFR|TRDN|LHCGR|RYR1|CACNA1A|PDE1A|RYR2|CAMK4|CACNA1G|GRIN2A|GRM5|GRIN1|SLC8A3|GRM1|PDE1C|CACNA1E|PRKCB|CHRM3|CHRM2|CAMK2A|HTR4|PLCD1|TACR3|MYLK|ADRA1A|DRD5|ADCY8|CCKAR|DRD1|GRIN2C|ADRB3|GNAL|RYR3	1.02e-09
cAMP signaling pathway	KEGG PATHWAY	hsa04024	43	214	FXYD1|GRIA4|RAPGEF4|AKT1|PLCE1|ADCYAP1|GABBR2|HTR1A|BDNF|RYR2|PDE3A|CAMK4|GRIN3A|VIPR2|TNNI3|GLP1R|GRIN1|LIPE|CREB5|ATP1B2|CAMK2A|CHRM2|HTR4|CNGA3|POMC|FFAR2|GHSR|EDN3|PPP1CC|SST|DRD5|ADCY8|HCN4|DRD1|GRIN2B|GRIN2C|GRIN2A|NPY|PDE4B|PTCH1|CFTR|HTR1B|HHIP	5.19e-09
Nicotine addiction	KEGG PATHWAY	hsa05033	18	40	CACNA1B|GRIN2B|GABRA6|GABRG3|GABRG2|SLC32A1|GRIA4|GRIN3A|GRIN2C|GRIN2A|CACNA1A|GABRA5|GABRA4|GRIN1|GABRB3|GABRA1|GABRB2|GABRB1	9.75e-09
Axon guidance	KEGG PATHWAY	hsa04360	37	181	NFATC2|NFATC4|RYK|FYN|EPHA5|SSH1|EPHA1|PARD6B|BMPR1B|SEMA4A|RGMA|PLXNB2|NTNG1|NTNG2|GDF7|DCC|SLIT2|SLIT1|ARHGEF12|DPYSL5|EPHB6|EPHB4|EFNA3|CAMK2A|UNC5D|PRKCZ|ABLIM2|SHH|CXCL12|SEMA7A|RHOD|NGEF|PAK7|ROBO1|ROBO3|PLXNA4|PTCH1	4.01e-08
Breast cancer	KEGG PATHWAY	hsa05224	32	147	WNT3A|TNFSF11|AKT1|FZD10|FLT4|FLG|FZD2|WNT10A|FGF19|FGF10|FGF17|WNT2B|TCF4|TCF7|SHC3|RBP3|FGF9|FGF8|FGF6|FGF5|FGF4|FGF3|CSNK1A1|ESR1|WNT3|WNT2|WNT1|KIT|DLL3|CDK6|WNT16|FGF23	9.4e-08
Ras signaling pathway	KEGG PATHWAY	hsa04014	42	232	RASGRP2|RASGRP3|PDGFRA|FGF9|PDGFRB|RASSF1|NGF|AKT1|PLCE1|RASAL3|BDNF|FLG|FLT1|NTRK1|NTRK2|FGF19|ETS1|GRIN1|FGF10|FGF17|PDGFA|NTF3|SHC3|PRKCB|EFNA3|VEGFA|VEGFC|FGF8|PLA2G4C|FGF6|FGF5|FGF4|FGF3|PLA2G4F|RASGRF2|FLT4|KIT|GRIN2B|GNG4|GRIN2A|PAK7|FGF23	1.01e-07
Glutamatergic synapse	KEGG PATHWAY	hsa04724	27	114	GRIA4|CACNA1A|SHANK2|GRIN3A|GRM8|GRM5|GRM6|GRM7|GRM1|GRM3|PRKCB|GRIN1|PLA2G4C|SHANK3|PLA2G4F|SHANK1|GRIK1|GRIK2|ADCY8|GRIK5|GRIN2B|GRIN2C|GNG4|GRIN2A|SLC1A6|SLC1A2|SLC1A3	2.2e-07
MAPK signaling pathway	KEGG PATHWAY	hsa04010	48	295	RASGRP2|RASGRP3|PDGFRA|VEGFC|PDGFRB|TGFB2|CACNA1E|FGF9|AKT1|CACNA2D3|BDNF|FLT4|FLG|FLT1|CACNG8|MECOM|CACNA1A|CACNA1B|NTRK1|NTRK2|CACNA1G|FGF19|SCT|FGF10|FGF17|PDGFA|NTF3|PRKCB|EFNA3|FGF23|VEGFA|NGF|FGF8|PLA2G4C|FGF6|FGF5|FGF4|FGF3|PLA2G4F|PTPN5|FLNC|PTPRR|RASGRF2|KIT|MEF2C|EREG|CACNG3|CACNG5	2.23e-07
Focal adhesion	KEGG PATHWAY	hsa04510	37	199	ITGA8|PDGFRB|PDGFRA|PDGFA|FYN|ITGA4|LAMA2|AKT1|FLT4|CAV2|FLT1|THBS4|SHC3|THBS2|COL29A1|RELN|FLNC|SCT|CAV1|CAPN2|LAMA1|ITGB3|LAMA3|ITGB6|COMP|PRKCB|COL9A1|VEGFA|VEGFC|BCAR1|PAK7|PPP1CC|CCND2|MYLK|COL1A2|COL6A2|COL6A6	3.2e-07
Gastric cancer	KEGG PATHWAY	hsa05226	31	149	WNT3A|TGFB2|CDX2|AKT1|FZD10|FZD2|WNT10A|FGF19|TERT|FGF17|WNT2B|TCF4|TCF7|SHC3|MUC2|RBP3|FGF9|FGF8|SHH|FGF6|FGF5|FGF4|FGF3|CTNNA2|FGF10|CSNK1A1|WNT3|WNT2|WNT1|WNT16|FGF23	3.5e-07
Maturity onset diabetes of the young	KEGG PATHWAY	hsa04950	13	26	NEUROD1|PAX6|PAX4|ONECUT1|HNF4A|SLC2A2|HNF1B|NEUROG3|FOXA2|NR5A2|NKX2-2|PDX1|NKX6-1	4.33e-07
Cytokine-cytokine receptor interaction	KEGG PATHWAY	hsa04060	47	294	CCL2|TNFSF11|CCL1|CCL7|IL23A|NODAL|CCL8|TNFSF18|IL12B|IL21|CCR1|BMPR1B|BMP10|TSLP|CXCL5|GDF3|GDF7|GDF6|TNFRSF10D|TNFRSF8|CXCL17|TNFSF4|EPOR|IL5RA|ACVRL1|IL2RB|IL17A|CD40|LEPR|CCL13|NGF|BMP3|CXCL12|TGFB2|CXCL1|CCL11|BMP5|BMP4|TNFRSF1B|BMP2|CXCL6|CSH1|LEP|PRLR|CXCL3|EDAR|GDF10	4.63e-07
Wnt signaling pathway	KEGG PATHWAY	hsa04310	32	160	LGR5|WNT3A|NFATC2|NFATC4|RYK|WIF1|FZD10|FZD2|WNT10A|SOX17|WNT2B|TCF4|TCF7|PRKCB|RNF43|CAMK2A|SFRP2|RSPO2|RSPO1|SFRP1|NOTUM|CSNK1A1|SFRP4|SFRP5|WNT3|WNT2|WNT1|CCND2|DKK2|DKK1|WNT16|RSPO4	4.89e-07
Proteoglycans in cancer	KEGG PATHWAY	hsa05205	37	203	WNT3A|TGFB2|HSPG2|IL12B|AKT1|PLCE1|EZR|FZD10|HPSE2|CAV2|FLG|CAV1|FZD2|TWIST1|WNT10A|SCT|WNT2B|ITGB3|ARHGEF12|PRKCB|CAMK2A|VEGFA|SHH|PTPN6|FLNC|PPP1CC|ESR1|WNT3|WNT2|WNT1|HOXD10|ANK1|IHH|ANK3|WNT16|PTCH1|MMP2	4.9e-07
Morphine addiction	KEGG PATHWAY	hsa05032	23	91	GABRG3|GABRG2|SLC32A1|GABRA5|GABRA4|GABBR2|GABRA6|GABRA1|PDE1C|CACNA1A|CACNA1B|PDE3A|PRKCB|OPRM1|GABRB1|GABRB2|GABRB3|KCNJ9|ADCY8|DRD1|GNG4|PDE4B|PDE1A	6.49e-07
Hippo signaling pathway	KEGG PATHWAY	hsa04390	31	154	WNT3A|TGFB2|CCND2|RASSF1|GDF6|BMPR1B|FZD10|FZD2|WNT10A|GDF7|PARD6B|CSNK1D|WNT2B|TCF4|TCF7|PPP2R2B|PRKCZ|RASSF6|CTNNA2|PPP1CC|BMP5|BMP4|BMP2|LLGL1|WNT3|WNT2|WNT1|PPP2CB|TP73|INADL|WNT16	6.49e-07
Human papillomavirus infection	KEGG PATHWAY	hsa05165	50	330	ITGA8|WNT3A|CCND2|TCF4|ITGA4|ITGB3|AKT1|LAMA3|FZD10|FZD2|CCNA1|WNT10A|THBS4|THBS2|PARD6B|COL29A1|INADL|RELN|HES3|TERT|PDGFRB|WNT2B|LAMA1|LAMA2|PPP2CB|ITGB6|COMP|CREB5|PPP2R2B|RBP3|PTGS2|TCF7|COL9A1|TBPL2|LFNG|VEGFA|CSNK1A1|LLGL1|WNT3|WNT2|WNT1|EIF2AK2|TCIRG1|PRKCZ|COL1A2|CDK6|WNT16|HES2|COL6A2|COL6A6	8.32e-07
Taste transduction	KEGG PATHWAY	hsa04742	21	83	ACCN1|GABRA6|PDE1C|CACNA1A|PDE1A|GABRA4|CHRM3|HCN4|HTR1A|GRM1|ADCY8|SCN2A|TAS2R38|HTR3A|GABRA5|TRPM5|GABBR2|P2RY1|GABRA1|SCN3A|HTR1B	1.93e-06
Phospholipase D signaling pathway	KEGG PATHWAY	hsa04072	29	148	PDGFRB|PDGFRA|PTGFR|RAPGEF4|AKT1|DNM3|MS4A2|DGKZ|FCER1A|FYN|PIK3R5|DGKI|GRM8|GRM5|GRM6|GRM7|DGKG|GRM3|PDGFA|SHC3|PLA2G4C|PLA2G4F|F2|ADCY8|KIT|GRM1|AGPAT3|LPAR3|LPAR5	2.34e-06
Synaptic vesicle cycle	KEGG PATHWAY	hsa04721	20	78	SLC6A3|SLC6A2|SLC6A1|STX1B|SLC6A7|SLC18A1|SLC6A5|SNAP25|CACNA1A|SLC32A1|TCIRG1|CPLX2|DNM3|SLC6A13|SLC18A2|SLC1A6|SLC6A11|CACNA1B|SLC1A2|SLC1A3	2.83e-06
ECM-receptor interaction	KEGG PATHWAY	hsa04512	21	86	ITGA8|LAMA1|LAMA2|LAMA3|ITGB6|THBS2|THBS4|HSPG2|ITGA4|ITGB3|CD36|COL9A1|COL29A1|FREM2|COL1A2|RELN|COMP|SV2C|COL6A2|GP1BA|COL6A6	3.12e-06
MicroRNAs in cancer	KEGG PATHWAY	hsa05206	45	299	WNT3A|PTGS2|PDGFRA|TRIM71|MIR146A|RASSF1|TGFB2|MIR9-3|RECK|EZR|BMF|SERPINB5|MIR206|PRKCB|ZFPM2|MCL1|PDGFRB|MIR34A|PDGFA|ITGB3|MIR520G|HMGA2|MIR124-2|MIR129-2|EFNA3|MIR124-3|RBP3|VEGFA|MIR137|IGF2BP1|ZEB1|ZEB2|CYP24A1|WNT3|CCND2|MIR150|HOXD10|VIM|MIR133B|CDK6|MIR520B|MIR520C|MIR520A|MIR141|MIR520E	3.35e-06
Tight junction	KEGG PATHWAY	hsa04530	31	170	MYH11|CD1D|CD1E|CD1B|CD1C|CD1A|CLDN10|MYH13|CLDN11|CLDN16|CLDN17|TUBA3C|MYH1|MYH4|MYH8|PARD6B|CLDN8|CLDN4|CLDN6|JAM2|BVES|CLDN22|CLDN25|PPP2R2B|PRKCZ|GATA4|LLGL1|PPP2CB|EZR|INADL|CFTR	3.95e-06
GABAergic synapse	KEGG PATHWAY	hsa04727	21	89	SLC6A11|SLC6A1|GABRA6|GABRG3|GABRG2|SLC32A1|PRKCB|ADCY8|SLC12A5|GABRA5|GNG4|CACNA1B|GABRB1|CACNA1A|SLC6A13|GABRA4|GABBR2|GABRB3|GABRA1|GABRB2|GAD2	4.94e-06
Regulation of actin cytoskeleton	KEGG PATHWAY	hsa04810	35	214	ITGA8|PDGFRB|PDGFRA|FGF8|ITGA4|ARHGEF12|FLG|GSN|FGF4|BCAR1|ARHGEF7|FGF19|FGF10|FGF17|SPATA13|PDGFA|ITGB3|ITGB6|CHRM3|CHRM2|FGF9|SSH1|FGF6|FGF5|CXCL12|FGF3|F2|PPP1CC|MOS|MYLK|EZR|PFN3|PAK7|FGF23|LPAR5	8.26e-06
Melanoma	KEGG PATHWAY	hsa05218	18	72	PDGFA|PDGFRA|FGF10|FGF9|PDGFRB|FGF3|AKT1|FGF19|RBP3|CDK6|FGF8|MITF|FGF6|FGF5|FGF4|FGF17|FGF23|FLG	1.17e-05
Hematopoietic cell lineage	KEGG PATHWAY	hsa04640	21	97	EPOR|CD38|CD1D|CD1E|CD1B|CD1C|CD1A|IL5RA|GP1BA|CD59|ITGA4|ITGB3|CD36|KIT|CD33|CR1|ANPEP|CD34|CD8A|CD8B|HLA-DQA2	1.53e-05
Arrhythmogenic right ventricular cardiomyopathy (ARVC)	KEGG PATHWAY	hsa05412	18	77	ITGA8|TCF4|LAMA2|RYR2|DES|ITGB6|SGCD|ITGA4|ITGB3|LAMA1|CACNG8|ACTN2|TCF7|CACNA2D3|SLC8A3|CACNG3|CACNG5|CTNNA2	2.55e-05
Basal cell carcinoma	KEGG PATHWAY	hsa05217	16	63	WNT2B|TCF4|TCF7|BMP4|BMP2|WNT3|WNT2|WNT1|FZD2|WNT10A|SHH|WNT16|FZD10|PTCH1|WNT3A|HHIP	3e-05
Osteoclast differentiation	KEGG PATHWAY	hsa04380	24	128	TNFSF11|NFATC2|AKT1|MITF|LILRB5|LILRB4|LILRB2|LILRB1|FYN|CAMK4|BLNK|SIRPG|ITGB3|SPI1|LCP2|TGFB2|CALCR|SIRPB2|SIRPB1|LILRA6|LILRA4|LILRA5|LILRA3|LILRA1	3.14e-05
Signaling pathways regulating pluripotency of stem cells	KEGG PATHWAY	hsa04550	25	140	WNT3A|MYF5|NODAL|ONECUT1|AKT1|BMPR1B|HAND1|FZD10|FLG|FZD2|WNT10A|MEIS1|JAK3|ISL1|DLX5|NEUROG1|WNT2B|TCF7|PAX6|BMP4|WNT3|WNT2|ID4|WNT16|WNT1	4.41e-05
Transcriptional misregulation in cancer	KEGG PATHWAY	hsa05202	30	186	WT1|RUNX1T1|MITF|FLT1|RARA|SPI1|CCNA1|NTRK1|MEIS1|HOXA10|PDGFA|FLI1|TMPRSS2|HMGA2|CD40|FEV|IGFBP3|PAX7|PROM1|ZEB1|PAX5|IL2RB|ETV5|LMO2|CCND2|TLX3|MEF2C|BAIAP3|WNT16|HOXA9	4.42e-05
Protein digestion and absorption	KEGG PATHWAY	hsa04974	19	90	PRSS1|COL9A1|COL22A1|COL11A1|SLC9A3|ATP1B2|KCNE3|COL14A1|KCNQ1|COL29A1|PRSS3|COL1A2|COL24A1|SLC8A3|COL6A2|DPP4|MEP1A|COL12A1|COL6A6	5.15e-05
B cell receptor signaling pathway	KEGG PATHWAY	hsa04662	18	82	RASGRP3|NFATC2|LILRB4|LILRB2|LILRB1|CARD11|PRKCB|LILRB5|LILRA3|BCL10|AKT1|LILRA5|LILRA6|LILRA4|LILRA1|PTPN6|MALT1|BLNK	5.19e-05
Platelet activation	KEGG PATHWAY	hsa04611	23	124	RASGRP2|APBB1IP|GP1BA|ITGB3|AKT1|FYN|PIK3R5|PRKG1|PRKG2|ARHGEF12|TBXAS1|PRKCZ|PLA2G4C|LCP2|P2RY1|PLA2G4F|F2|PPP1CC|VAMP8|ADCY8|MYLK|COL1A2|F2RL3	5.26e-05
Gastric acid secretion	KEGG PATHWAY	hsa04971	17	75	SLC9A4|KCNJ2|KCNJ1|PRKCB|KCNJ16|SST|MYLK|CHRM3|CAMK2A|KCNK2|KCNQ1|ADCY8|ATP1B2|EZR|KCNK10|CFTR|ATP4A	5.89e-05
Leukocyte transendothelial migration	KEGG PATHWAY	hsa04670	21	112	RAPGEF4|CLDN10|CLDN4|CLDN16|CLDN17|JAM2|CDH5|CTNNA2|CLDN22|PRKCB|ITGA4|CLDN25|CLDN8|EZR|VCAM1|BCAR1|CLDN11|CXCL12|MMP2|CLDN6|ITK	9.54e-05
Dilated cardiomyopathy (DCM)	KEGG PATHWAY	hsa05414	19	96	ITGA8|LAMA1|LAMA2|RYR2|DES|MYH7|ITGB6|ADCY8|SGCD|ITGA4|TGFB2|CACNG8|TNNI3|ACTC1|CACNA2D3|SLC8A3|CACNG3|CACNG5|ITGB3	0.00010879
Dopaminergic synapse	KEGG PATHWAY	hsa04728	23	131	SLC6A3|PPP2CB|GRIA4|AKT1|CACNA1A|CACNA1B|CREB5|PRKCB|CAMK2A|PPP2R2B|CALY|PPP1CC|KCNJ9|DRD5|DRD3|DRD1|GRIN2B|GNG4|GRIN2A|GNAL|SLC18A2|SLC18A1|DRD4	0.000109101
Malaria	KEGG PATHWAY	hsa05144	13	49	CCL2|TGFB2|CR1|SELE|THBS4|THBS2|CD40|CD36|VCAM1|COMP|DARC|GYPA|GYPC	0.000112693
Circadian entrainment	KEGG PATHWAY	hsa04713	19	97	PRKCB|RYR1|KCNJ9|RYR2|ADCY8|CAMK2A|GRIA4|CACNA1G|GRIN2B|GRIN2C|GNG4|GRIN2A|PRKG1|ADCYAP1|PRKG2|MTNR1B|GRIN1|MTNR1A|RYR3	0.000122473
Serotonergic synapse	KEGG PATHWAY	hsa04726	21	115	SLC18A1|HTR5A|PTGS2|CACNA1A|KCNJ9|PRKCB|GNG4|HTR1A|ALOX15|HTR4|CACNA1B|CYP2C19|KCNN2|GABRB1|HTR3A|PLA2G4C|SLC18A2|GABRB2|GABRB3|PLA2G4F|HTR1B	0.000132005
Hypertrophic cardiomyopathy (HCM)	KEGG PATHWAY	hsa05410	18	90	ITGA8|LAMA1|LAMA2|RYR2|DES|MYH7|ITGB6|ACTC1|SGCD|ITGA4|TGFB2|CACNG8|TNNI3|CACNA2D3|SLC8A3|CACNG3|CACNG5|ITGB3	0.000145594
Oxytocin signaling pathway	KEGG PATHWAY	hsa04921	25	153	CD38|PTGS2|NFATC2|NFATC4|TRPC7|CACNG8|RYR1|RYR3|RYR2|CAMK4|PIK3R5|KCNJ12|PRKCB|CAMK2A|PLA2G4C|CACNA2D3|PLA2G4F|KCNJ2|PPP1CC|KCNJ9|ADCY8|MYLK|MEF2C|CACNG3|CACNG5	0.000153522
Amphetamine addiction	KEGG PATHWAY	hsa05031	15	68	SLC6A3|GRIN2B|CAMK4|PPP1CC|CREB5|PRKCB|CAMK2A|GRIA4|DRD1|GRIN3A|GRIN2C|GRIN2A|SLC18A2|GRIN1|SLC18A1	0.000203229
Arachidonic acid metabolism	KEGG PATHWAY	hsa00590	14	63	PTGS2|TBXAS1|CYP2E1|CYP2C19|LTC4S|ALOX15|GPX5|GPX7|GPX6|PLA2G4C|PTGDS|CYP4F2|PLA2G4F|CYP2U1	0.000306645
Cocaine addiction	KEGG PATHWAY	hsa05030	12	49	SLC6A3|GRIN2B|SLC18A1|CREB5|DRD1|GRIN3A|GRIN2C|GRIN2A|SLC18A2|GRIN1|BDNF|GRM3	0.00038297
Cushing syndrome	KEGG PATHWAY	hsa04934	24	155	WNT3A|FZD10|CRH|FZD2|CYP11A1|WNT10A|KCNK2|CACNA1G|KCNA4|WNT2B|TCF4|TCF7|CREB5|CAMK2A|RBP3|POMC|WNT3|WNT2|WNT1|ADCY8|CDK6|WNT16|CYP11B1|CRHR2	0.000414579
Melanogenesis	KEGG PATHWAY	hsa04916	18	101	WNT2B|TCF4|TCF7|PRKCB|WNT3|WNT2|WNT1|POMC|ADCY8|CAMK2A|KIT|WNT10A|MITF|WNT16|EDNRB|FZD2|FZD10|WNT3A	0.00049851
Adrenergic signaling in cardiomyocytes	KEGG PATHWAY	hsa04261	23	149	SCN7A|ACTC1|RAPGEF4|AKT1|MYH7|RYR2|PIK3R5|TNNI3|SLC8A3|SCN4B|CREB5|ATP1B2|CAMK2A|PPP2R2B|CACNA2D3|KCNQ1|ADRA1A|PPP1CC|PPP2CB|ADCY8|CACNG8|CACNG3|CACNG5	0.000561372
Steroid hormone biosynthesis	KEGG PATHWAY	hsa00140	13	60	CYP1A1|CYP7B1|CYP11A1|CYP19A1|CYP1A2|CYP2E1|UGT2B15|UGT2B11|SULT2B1|CYP11B2|SRD5A2|CYP3A4|CYP11B1	0.000611289
Chemokine signaling pathway	KEGG PATHWAY	hsa04062	27	190	CCL2|RASGRP2|CCL1|CCL7|DOCK2|CCL8|CCR1|PREX1|PIK3R5|AKT1|JAK3|SHC3|PRKCB|PRKCZ|HCK|CXCL12|BCAR1|CXCL1|CCL11|CXCL3|CCL13|CXCL5|ITK|CXCL6|ADCY8|GNG4|ELMO1	0.000623485
Insulin secretion	KEGG PATHWAY	hsa04911	16	86	ATP1B2|SNAP25|PRKCB|ADCY8|CREB5|RYR2|CHRM3|CAMK2A|CCKAR|RAPGEF4|KCNN3|KCNN2|ADCYAP1|GLP1R|PDX1|SLC2A2	0.000666448
Cholinergic synapse	KEGG PATHWAY	hsa04725	18	112	FYN|KCNJ2|CAMK4|PRKCB|KCNJ12|CACNA1A|CHRM2|KCNQ5|CHRM3|CAMK2A|KCNQ1|AKT1|PIK3R5|CREB5|GNG4|SLC5A7|ADCY8|CACNA1B	0.0014284
TGF-beta signaling pathway	KEGG PATHWAY	hsa04350	16	94	GREM2|PPP2CB|BMP5|GREM1|BMP2|NODAL|ID4|HFE2|GDF7|TGFB2|GDF6|BMPR1B|BMP4|PITX2|FBN1|RGMA	0.00152397
Long-term depression	KEGG PATHWAY	hsa04730	12	60	PRKCB|GRID2|RYR1|CACNA1A|PPP2CB|GRM1|C7orf16|PRKG1|PRKG2|PLA2G4C|CRH|PLA2G4F	0.00177514
Hepatocellular carcinoma	KEGG PATHWAY	hsa05225	23	168	WNT3A|DPF3|TGFB2|AKT1|SMARCA2|FZD10|FZD2|WNT10A|TERT|WNT2B|TCF4|TCF7|CDK6|SHC3|PRKCB|RBP3|CSNK1A1|WNT3|WNT2|WNT1|GSTM5|ACTL6B|WNT16	0.00232232
Retrograde endocannabinoid signaling	KEGG PATHWAY	hsa04723	21	148	CNR1|PTGS2|GABRA6|GABRG3|GABRG2|KCNJ9|PRKCB|ADCY8|GRIA4|GRM1|GRM5|GNG4|CACNA1B|CACNA1A|GABRA5|GABRA4|GABRB2|GABRB3|GABRA1|SLC32A1|GABRB1	0.00240209
Asthma	KEGG PATHWAY	hsa05310	8	31	CCL11|RNASE3|FCER1A|CD40|EPO|PRG2|MS4A2|HLA-DQA2	0.00267386
Metabolic pathways	KEGG PATHWAY	hsa01100	126	1433	CD38|PTGS2|AOC2|CKM|ABP1|CDO1|P4HA3|AGL|B3GAT2|CYP4F2|HPSE2|PDE9A|AHCYL2|SELENBP1|PLA2G7|HAL|TBXAS1|TPO|LIPH|BCAT1|CYP3A4|DBH|INPP5F|HYAL2|ADCY8|ALDH5A1|ALDH3B2|H6PD|GPLD1|PTGDS|COX6B2|ACADL|B3GAT1|CYP2U1|COX7B2|CYP11A1|PANK4|XDH|LTC4S|GBA3|GUCY2D|UMPS|CHST9|MOGAT3|ST8SIA5|CYP19A1|G6PC|CYP2E1|PDE6B|PDE6C|MGAT3|GPX5|ANPEP|GPX7|GPX6|GALNT9|PLCE1|HAAO|GAD2|BHMT|PDE3A|UGT2B15|UGT2B11|NMNAT2|IL4I1|DHC…	0.00292325
Cardiac muscle contraction	KEGG PATHWAY	hsa04260	14	86	TRDN|MYH7|ACTC1|RYR2|ATP1B2|CACNG8|COX4I2|TNNI3|SLC8A3|CACNA2D3|COX6B2|CACNG3|CACNG5|COX7B2	0.00415558
Gap junction	KEGG PATHWAY	hsa04540	14	88	PDGFA|TUBA3C|PDGFRB|TUBB6|PRKCB|ADCY8|PDGFRA|DRD1|GJD2|CSNK1D|PRKG1|PRKG2|GRM5|GRM1	0.00497337
Pancreatic secretion	KEGG PATHWAY	hsa04972	15	98	PNLIPRP1|CD38|PRKCB|ADCY8|RYR2|CHRM3|CCKAR|KCNQ1|PRSS1|SLC4A4|PRSS3|SCTR|CLCA1|CFTR|ATP1B2	0.00511593
Viral protein interaction with cytokine and cytokine receptor	KEGG PATHWAY	hsa04061	15	100	CCL2|CXCL1|CXCL3|CCL1|TNFRSF1B|CCL7|CXCL6|CCL8|IL2RB|CCR1|CCL13|TNFRSF10D|CXCL5|CXCL12|CCL11	0.00602327
Linoleic acid metabolism	KEGG PATHWAY	hsa00591	7	29	CYP1A2|CYP2E1|ALOX15|CYP2C19|PLA2G4C|CYP3A4|PLA2G4F	0.00663418
T cell receptor signaling pathway	KEGG PATHWAY	hsa04660	15	103	NFATC2|CD8B|ITK|CARD11|FYN|BCL10|AKT1|CD247|PRKCQ|CD8A|LCP2|PAK7|PTPN6|MALT1|PDCD1	0.00762266
cGMP-PKG signaling pathway	KEGG PATHWAY	hsa04022	21	167	ADRA1A|NFATC2|NFATC4|MYH7|NPPC|PDE3A|CREB5|ADCY8|MYLK|ADRA2B|ATP1B2|MEF2C|AKT1|PIK3R5|ADRB3|PRKG1|PRKG2|GATA4|SLC8A3|EDNRB|PPP1CC	0.0082589
Renin-angiotensin system	KEGG PATHWAY	hsa04614	6	23	MRGPRD|CTSG|KLK1|KLK2|ANPEP|MAS1	0.00859088
Amoebiasis	KEGG PATHWAY	hsa05146	14	95	CXCL1|LAMA1|LAMA2|LAMA3|CD1D|CD1A|MUC2|SERPINB13|PRKCB|TGFB2|IL12B|COL1A2|GNAL|CTSG	0.00890721
Long-term potentiation	KEGG PATHWAY	hsa04720	11	67	PPP1CC|PRKCB|ADCY8|CAMK2A|CAMK4|GRIN2B|GRIN2C|GRIN2A|GRM5|GRIN1|GRM1	0.00985215
Prostate cancer	KEGG PATHWAY	hsa05215	14	97	TCF4|PDGFRA|ETV5|PDGFA|TMPRSS2|TCF7|AKT1|KLK3|RBP3|PDGFRB|SRD5A2|ZEB1|CREB5|FLG	0.0103937
Phenylalanine metabolism	KEGG PATHWAY	hsa00360	5	17	ALDH3B2|IL4I1|AOC2|GLYAT|HPD	0.0107505
Choline metabolism in cancer	KEGG PATHWAY	hsa05231	14	99	DGKZ|PDGFA|PDGFRA|PRKCB|SLC44A4|PDGFRB|SLC22A3|DGKG|AKT1|DGKI|SLC22A2|SLC5A7|PLA2G4C|PLA2G4F	0.0120675
Amyotrophic lateral sclerosis (ALS)	KEGG PATHWAY	hsa05014	9	51	TNFRSF1B|NEFM|NEFL|NEFH|GRIN2B|GRIN2C|GRIN2A|GRIN1|SLC1A2	0.0127024
AGE-RAGE signaling pathway in diabetic complications	KEGG PATHWAY	hsa04933	14	100	CCL2|TGFB2|VEGFA|SELE|PRKCB|AKT1|PRKCZ|COL1A2|VCAM1|VEGFC|PLCD1|PLCE1|MMP2|NOX4	0.0129793
Salivary secretion	KEGG PATHWAY	hsa04970	13	90	ADRA1A|CD38|ADCY8|RYR3|PRKCB|CHRM3|ATP1B2|LPO|ADRB3|PRKG1|PRKG2|PRB1|PRB2	0.013157
Rheumatoid arthritis	KEGG PATHWAY	hsa05323	13	91	CCL2|CXCL1|TNFSF11|CXCL5|IL17A|IL23A|CXCL6|TGFB2|TCIRG1|VEGFA|CXCL12|HLA-DQA2|FLT1	0.0141914
Bile secretion	KEGG PATHWAY	hsa04976	11	72	SLC10A2|SLC9A3|ATP1B2|ADCY8|SLC4A4|KCNN2|ABCB4|SCTR|CYP3A4|CFTR|SULT2A1	0.0153612
Chemical carcinogenesis	KEGG PATHWAY	hsa05204	12	82	CYP3A43|CYP1A1|CYP1A2|PTGS2|GSTM5|CYP2E1|UGT2B15|ALDH3B2|CYP2C19|UGT2B11|CYP3A4|SULT2A1	0.015443
Primary immunodeficiency	KEGG PATHWAY	hsa05340	7	37	AIRE|CD40|JAK3|CD8A|CD8B|AICDA|BLNK	0.019648
Fluid shear stress and atherosclerosis	KEGG PATHWAY	hsa05418	17	139	CCL2|PDGFA|ITGB3|BMP4|CAV2|GSTM5|MEF2C|AKT1|BMPR1B|PRKCZ|VEGFA|VCAM1|SELE|CDH5|MMP2|NPPC|CAV1	0.0202932
Jak-STAT signaling pathway	KEGG PATHWAY	hsa04630	19	162	EPOR|PDGFA|PDGFRA|IL2RB|IL23A|IL21|CSH1|IL5RA|CCND2|IL12B|LEPR|LEP|AKT1|JAK3|TSLP|PRLR|PDGFRB|PTPN6|MCL1	0.0211049
Hedgehog signaling pathway	KEGG PATHWAY	hsa04340	8	47	CSNK1A1|CCND2|CSNK1D|EVC2|IHH|SHH|PTCH1|HHIP	0.0216959
Neurotrophin signaling pathway	KEGG PATHWAY	hsa04722	15	119	NGF|NTF3|CAMK4|SHC3|CAMK2A|NTRK2|NTRK3|AKT1|NTRK1|TP73|CCK|ZNF274|IRAK3|BDNF|MATK	0.0226259
Retinol metabolism	KEGG PATHWAY	hsa00830	10	67	CYP1A1|CYP1A2|SDR16C5|UGT2B15|UGT2B11|LRAT|CYP3A4|ALDH1A1|ALDH1A2|CYP26C1	0.0230583
Vascular smooth muscle contraction	KEGG PATHWAY	hsa04270	16	132	ADRA1A|MYH11|ARHGEF12|PPP1CC|PRKCB|ADCY8|MYLK|NPPC|PRKCQ|PRKG1|PLA2G4C|CALCA|EDN3|PLA2G4F|CALCB|PPP1R14A	0.0254512
Ovarian steroidogenesis	KEGG PATHWAY	hsa04913	8	49	CYP1A1|CYP11A1|LHCGR|CYP19A1|ADCY8|PTGS2|PLA2G4C|PLA2G4F	0.0263695
NF-kappa B signaling pathway	KEGG PATHWAY	hsa04064	13	100	PTGS2|TNFSF11|CCL13|CARD11|PRKCB|CD40|VCAM1|EDAR|PRKCQ|CXCL12|BCL10|MALT1|BLNK	0.0265089
Central carbon metabolism in cancer	KEGG PATHWAY	hsa05230	10	69	PDGFRB|PDGFRA|SLC16A3|NTRK1|NTRK3|AKT1|FLG|KIT|LDHB|SLC2A2	0.0270571
Adipocytokine signaling pathway	KEGG PATHWAY	hsa04920	10	69	CPT1C|TNFRSF1B|G6PC|CD36|LEPR|LEP|AKT1|NPY|POMC|PRKCQ	0.0270571
Glycosphingolipid biosynthesis - globo and isoglobo series	KEGG PATHWAY	hsa00603	4	15	ST8SIA1|GBGT1|FUT2|FUT9	0.0288493
Endocrine and other factor-regulated calcium reabsorption	KEGG PATHWAY	hsa04961	8	50	PTH1R|ESR1|PRKCB|ATP1B2|KLK1|KLK2|DNM3|SLC8A3	0.0289504
Fat digestion and absorption	KEGG PATHWAY	hsa04975	7	41	PNLIPRP1|CD36|MGAT3|MOGAT3|FABP1|SLC27A4|APOA1	0.0303775
Glycerolipid metabolism	KEGG PATHWAY	hsa00561	9	61	DGKZ|PNLIPRP1|LIPH|DGKI|AGPAT3|MOGAT3|AKR1B1|DGKG|MGAT3	0.0319547
Vitamin digestion and absorption	KEGG PATHWAY	hsa04977	5	24	CUBN|LRAT|CBLC|APOA1|SLC19A3	0.0336561
C-type lectin receptor signaling pathway	KEGG PATHWAY	hsa04625	13	104	PTGS2|NFATC2|NFATC4|IL23A|NLRP3|EGR2|CLEC4E|IL12B|AKT1|MALT1|ARHGEF12|BCL10|BCL3	0.0339742
Estrogen signaling pathway	KEGG PATHWAY	hsa04915	16	138	RARA|SHC3|KCNJ9|ESR1|ADCY8|TFF1|KRT27|AKT1|OPRM1|CREB5|POMC|GABBR2|MMP2|GRM1|KRT19|KRT18	0.0350656
Parathyroid hormone synthesis, secretion and action	KEGG PATHWAY	hsa04928	13	106	PTH1R|TNFSF11|CYP24A1|CREB5|PRKCB|ADCY8|MEF2C|SLC34A2|CASR|PDE4B|GCM2|FGF23|FLG	0.0382247
Thyroid hormone synthesis	KEGG PATHWAY	hsa04918	10	74	PRKCB|TPO|ATP1B2|CREB5|DUOX2|ADCY8|GPX5|SLC5A5|GPX7|GPX6	0.0391676
Glioma	KEGG PATHWAY	hsa05214	10	75	PDGFA|PDGFRA|SHC3|PRKCB|CAMK2A|CAMK4|AKT1|RBP3|CDK6|PDGFRB	0.0419746
Regulation of lipolysis in adipocytes	KEGG PATHWAY	hsa04923	8	55	PTGS2|LIPE|ADCY8|AKT1|ADRB3|PRKG1|PRKG2|NPY	0.0444669
Metabolism of xenobiotics by cytochrome P450	KEGG PATHWAY	hsa00980	10	76	CYP1A1|CYP1A2|ALDH3B2|GSTM5|CYP2E1|UGT2B15|UGT2B11|CYP3A4|AKR7A3|SULT2A1	0.0449157
Aldosterone synthesis and secretion	KEGG PATHWAY	hsa04925	12	98	CAMK4|CYP11A1|LIPE|KCNK9|ATP1B2|CREB5|PRKCB|ADCY8|CAMK2A|CACNA1G|POMC|CYP11B2	0.0456237
Tyrosine metabolism	KEGG PATHWAY	hsa00350	6	36	DBH|AOC2|ALDH3B2|TPO|IL4I1|HPD	0.0474009
Type II diabetes mellitus	KEGG PATHWAY	hsa04930	7	46	CACNA1A|CACNA1B|CACNA1E|CACNA1G|PRKCZ|PDX1|SLC2A2	0.0485538
Alcoholism	KEGG PATHWAY	hsa05034	19	180	SLC6A3|GRIN2B|CAMK4|SLC18A1|SHC3|BDNF|PKIA|NTRK2|DRD1|GRIN3A|GRIN2C|GNG4|GRIN2A|NPY|CREB5|SLC18A2|GRIN1|CRH|PPP1CC	0.0486373
Glycosphingolipid biosynthesis - lacto and neolacto series	KEGG PATHWAY	hsa00601	5	27	ST8SIA1|ABO|FUT2|FUT9|ST3GAL4	0.0488884
Inflammatory mediator regulation of TRP channels	KEGG PATHWAY	hsa04750	12	100	ACCN1|NGF|PPP1CC|PRKCB|ADCY8|CAMK2A|NTRK1|PRKCQ|TRPM8|PLA2G4C|TRPA1|PLA2G4F	0.0511524
African trypanosomiasis	KEGG PATHWAY	hsa05143	6	37	IDO1|SELE|PRKCB|IL12B|VCAM1|APOA1	0.0522581
TNF signaling pathway	KEGG PATHWAY	hsa04668	13	112	CCL2|PTGS2|CXCL3|TNFRSF1B|CXCL1|CXCL6|SELE|CREB5|AKT1|VCAM1|VEGFC|CXCL5|BCL3	0.0532082
Complement and coagulation cascades	KEGG PATHWAY	hsa04610	10	79	F2|CR1|F7|C4BPB|CD59|C1QA|F2RL3|CLU|F10|CD46	0.0545642
Renin secretion	KEGG PATHWAY	hsa04924	9	69	KCNJ2|PDE1C|PDE1A|PDE3A|ADRB3|ADCYAP1|PRKG2|EDN3|CLCA1	0.0575541
Cysteine and methionine metabolism	KEGG PATHWAY	hsa00270	7	49	BHMT|AHCYL2|CDO1|BCAT1|PSAT1|IL4I1|LDHB	0.0621929
Viral myocarditis	KEGG PATHWAY	hsa05416	8	60	LAMA1|LAMA2|MYH7|SGCD|FYN|CD40|HLA-DQA2|CAV1	0.0646352
Cholesterol metabolism	KEGG PATHWAY	hsa04979	7	50	PCSK9|LIPH|CD36|PLTP|APOH|APOA1|LPA	0.0672082
Caffeine metabolism	KEGG PATHWAY	hsa00232	2	5	CYP1A2|XDH	0.067935
p53 signaling pathway	KEGG PATHWAY	hsa04115	9	72	SESN3|CCND2|TP73|SFN|IGFBP3|CCNG2|PRG3|CDK6|SERPINB5	0.0698167
Th17 cell differentiation	KEGG PATHWAY	hsa04659	12	107	RARA|NFATC2|IL17A|IL23A|IRF4|TBX21|IL2RB|IL21|CD247|JAK3|PRKCQ|HLA-DQA2	0.0740148
Thyroid hormone signaling pathway	KEGG PATHWAY	hsa04919	13	119	ITGB3|BMP4|MYH7|ESR1|RCAN2|ATP1B2|PRKCB|AKT1|PLCE1|DIO1|PLCD1|GATA4|DIO3	0.0752197
Natural killer cell mediated cytotoxicity	KEGG PATHWAY	hsa04650	14	131	KIR2DL3|NFATC2|PRKCB|CD48|SHC3|ULBP1|FYN|CD244|CD247|ULBP3|KIR2DL4|LCP2|KIR3DL2|PTPN6	0.0759059
Insulin resistance	KEGG PATHWAY	hsa04931	12	108	PPP1CC|CREB5|PRKCB|G6PC|SLC2A2|CD36|AKT1|PRKCZ|PRKCQ|SLC27A4|SLC27A6|SLC27A3	0.0777403
Tryptophan metabolism	KEGG PATHWAY	hsa00380	6	42	CYP1A1|CYP1A2|IDO1|ABP1|HAAO|IL4I1	0.0809315
Proximal tubule bicarbonate reclamation	KEGG PATHWAY	hsa04964	4	23	SLC4A4|SLC9A3|ATP1B2|CA4	0.0879232
Glycosaminoglycan biosynthesis - keratan sulfate	KEGG PATHWAY	hsa00533	3	14	CHST1|CHST2|CHST6	0.0885637
Cortisol synthesis and secretion	KEGG PATHWAY	hsa04927	8	65	CYP11A1|CREB5|ADCY8|KCNK2|CACNA1G|POMC|CYP11B1|KCNA4	0.089681
Acute myeloid leukemia	KEGG PATHWAY	hsa05221	8	66	RARA|TCF4|TCF7|SPI1|CCNA1|KIT|AKT1|RUNX1T1	0.0952786
Glycosaminoglycan biosynthesis - heparan sulfate / heparin	KEGG PATHWAY	hsa00534	4	24	HS6ST1|HS3ST2|HS3ST1|HS3ST3B1	0.097688
Glycosphingolipid biosynthesis - ganglio series	KEGG PATHWAY	hsa00604	3	15	ST8SIA5|ST6GALNAC3|ST8SIA1	0.101487
Th1 and Th2 cell differentiation	KEGG PATHWAY	hsa04658	10	92	NFATC2|IL2RB|TBX21|IL12B|RUNX3|CD247|JAK3|PRKCQ|DLL3|HLA-DQA2	0.111396
IL-17 signaling pathway	KEGG PATHWAY	hsa04657	10	93	CCL2|PTGS2|CXCL3|CXCL5|IL17A|CXCL6|CXCL1|CCL11|S100A8|CCL7	0.116791
Prolactin signaling pathway	KEGG PATHWAY	hsa04917	8	70	LHCGR|TNFSF11|CCND2|SHC3|PRLR|ESR1|SLC2A2|AKT1	0.119592
Hepatitis C	KEGG PATHWAY	hsa05160	15	155	CLDN10|PPP2CB|CLDN16|CLDN17|CLDN22|EIF2AK2|CLDN25|PPP2R2B|CLDN8|AKT1|RBP3|CDK6|CLDN11|CLDN4|CLDN6	0.121192
VEGF signaling pathway	KEGG PATHWAY	hsa04370	7	59	PTGS2|NFATC2|PRKCB|AKT1|VEGFA|PLA2G4C|PLA2G4F	0.122835
Aldosterone-regulated sodium reabsorption	KEGG PATHWAY	hsa04960	5	37	SFN|KCNJ1|PRKCB|ATP1B2|SGK1	0.12423
Sphingolipid signaling pathway	KEGG PATHWAY	hsa04071	12	119	ACER1|FCER1A|ASAH1|S1PR1|PPP2CB|FYN|PRKCB|PPP2R2B|AKT1|PRKCZ|SPP2|MS4A2	0.126448
AMPK signaling pathway	KEGG PATHWAY	hsa04152	12	120	CPT1C|LIPE|CCNA1|CREB5|PPP2CB|G6PC|CD36|LEPR|LEP|AKT1|PPP2R2B|CFTR	0.131571
Adherens junction	KEGG PATHWAY	hsa04520	8	72	TCF4|TCF7|FYN|PTPRB|FLG|PTPN6|CTNNA2|PVRL4	0.132871
Drug metabolism - cytochrome P450	KEGG PATHWAY	hsa00982	8	72	ALDH3B2|CYP1A2|GSTM5|CYP2E1|UGT2B15|CYP2C19|UGT2B11|CYP3A4	0.132871
Intestinal immune network for IgA production	KEGG PATHWAY	hsa04672	6	49	ITGA4|CD40|MADCAM1|CXCL12|AICDA|HLA-DQA2	0.133025
Phototransduction	KEGG PATHWAY	hsa04744	4	28	RCVRN|PDE6B|GUCY2D|GUCA1C	0.141336
Cellular senescence	KEGG PATHWAY	hsa04218	15	160	NFATC2|IGFBP3|NFATC4|PPP1CC|CCNA1|CCND2|TGFB2|KIR2DL3|AKT1|RBP3|CAPN2|CDK6|KIR2DL4|GATA4|ETS1	0.14373
Leishmaniasis	KEGG PATHWAY	hsa05140	8	74	PTGS2|TGFB2|CR1|PRKCB|ITGA4|IL12B|PTPN6|HLA-DQA2	0.146867
Apelin signaling pathway	KEGG PATHWAY	hsa04371	13	137	APLNR|RYR1|RYR3|RYR2|ADCY8|GNG4|CAMK4|MEF2C|AKT1|PIK3R5|LIPE|SLC8A3|MYLK	0.15548
Pantothenate and CoA biosynthesis	KEGG PATHWAY	hsa00770	3	19	DPYS|PANK4|BCAT1	0.159575
PPAR signaling pathway	KEGG PATHWAY	hsa03320	8	76	CPT1C|CD36|PLTP|FABP1|SLC27A4|SLC27A6|ACADL|APOA1	0.161549
Pertussis	KEGG PATHWAY	hsa05133	8	76	CXCL5|IL23A|NLRP3|CXCL6|C4BPB|IRF8|IL12B|C1QA	0.161549
Nicotinate and nicotinamide metabolism	KEGG PATHWAY	hsa00760	4	30	NMNAT2|CD38|ITGB1BP3|NT5C1A	0.16559
Inflammatory bowel disease (IBD)	KEGG PATHWAY	hsa05321	7	65	TGFB2|IL17A|IL23A|TBX21|IL12B|IL21|HLA-DQA2	0.169731
Human T-cell leukemia virus 1 infection	KEGG PATHWAY	hsa05166	19	219	TBPL2|NFATC2|SPI1|NFATC4|CCNA1|BUB1B|EGR2|IL2RB|CCND2|ADCY8|TGFB2|CD40|AKT1|RBP3|CREB5|JAK3|TERT|ETS1|HLA-DQA2	0.177223
Non-small cell lung cancer	KEGG PATHWAY	hsa05223	7	66	ALK|RASSF1|PRKCB|AKT1|RBP3|JAK3|CDK6	0.178222
Parkinson disease	KEGG PATHWAY	hsa05012	13	142	SLC6A3|SNCAIP|COX4I2|DRD1|UBA7|SNCA|GNAL|SLC18A2|COX6B2|ATP5G2|UCHL1|SLC18A1|COX7B2	0.183596
Drug metabolism - other enzymes	KEGG PATHWAY	hsa00983	8	79	UMPS|GSTM5|CYP2E1|XDH|DPYS|UGT2B15|UGT2B11|CYP3A4	0.184782
EGFR tyrosine kinase inhibitor resistance	KEGG PATHWAY	hsa01521	8	79	PDGFA|PDGFRA|SHC3|PRKCB|AKT1|VEGFA|NRG1|PDGFRB	0.184782
Type I diabetes mellitus	KEGG PATHWAY	hsa04940	5	43	PTPRN2|PTPRN|HLA-DQA2|IL12B|GAD2	0.185441
Legionellosis	KEGG PATHWAY	hsa05134	6	55	CXCL1|CXCL3|CR1|EEF1A2|IL12B|BNIP3	0.187497
Relaxin signaling pathway	KEGG PATHWAY	hsa04926	12	130	SHC3|RXFP3|ADCY8|AKT1|GNG4|PRKCZ|COL1A2|VEGFC|VEGFA|EDNRB|MMP2|CREB5	0.188756
Fc epsilon RI signaling pathway	KEGG PATHWAY	hsa04664	7	68	FCER1A|FYN|AKT1|PLA2G4C|LCP2|MS4A2|PLA2G4F	0.195721
Carbohydrate digestion and absorption	KEGG PATHWAY	hsa04973	5	44	ATP1B2|AKT1|PRKCB|G6PC|SLC2A2	0.196566
Taurine and hypotaurine metabolism	KEGG PATHWAY	hsa00430	2	11	CDO1|GAD2	0.197053
beta-Alanine metabolism	KEGG PATHWAY	hsa00410	4	33	DPYS|ALDH3B2|AOC2|GAD2	0.204435
Kaposi sarcoma-associated herpesvirus infection	KEGG PATHWAY	hsa05167	16	186	CXCL1|PTGS2|NFATC2|NFATC4|CXCL3|CCR1|EIF2AK2|PREX1|AKT1|PIK3R5|RBP3|VEGFA|GNG4|CDK6|HCK|CD200R1	0.210669
SNARE interactions in vesicular transport	KEGG PATHWAY	hsa04130	4	34	STX1B|VAMP8|GOSR1|VAMP5	0.217933
Mannose type O-glycan biosynthesis	KEGG PATHWAY	hsa00515	3	23	B3GAT2|B3GAT1|FUT9	0.225161
Histidine metabolism	KEGG PATHWAY	hsa00340	3	23	ABP1|HAL|ALDH3B2	0.225161
Tuberculosis	KEGG PATHWAY	hsa05152	15	179	CD74|TGFB2|CR1|ARHGEF12|IL23A|CLEC4E|CAMK2A|IL12B|TCIRG1|AKT1|TLR1|HLA-DQA2|CCK|BCL10|MALT1	0.247654
Toxoplasmosis	KEGG PATHWAY	hsa05145	10	113	LAMA1|LAMA2|LAMA3|BIRC8|TGFB2|IL12B|AKT1|PIK3R5|CD40|HLA-DQA2	0.251719
Bacterial invasion of epithelial cells	KEGG PATHWAY	hsa05100	7	74	SHC3|BCAR1|DNM3|CAV2|ELMO1|CTNNA2|CAV1	0.251838
mTOR signaling pathway	KEGG PATHWAY	hsa04150	13	153	WNT2B|WNT3A|FZD2|SGK1|WNT3|WNT2|WNT1|PRKCB|AKT1|DEPDC6|WNT10A|WNT16|FZD10	0.252963
PD-L1 expression and PD-1 checkpoint pathway in cancer	KEGG PATHWAY	hsa05235	8	89	BATF|NFATC2|ALK|AKT1|CD247|PRKCQ|PTPN6|PDCD1	0.270978
Chagas disease (American trypanosomiasis)	KEGG PATHWAY	hsa05142	9	103	CCL2|TGFB2|PPP2CB|IL12B|C1QA|PPP2R2B|AKT1|CD247|GNAL	0.2781
Human cytomegalovirus infection	KEGG PATHWAY	hsa05163	18	225	CCL2|PTGS2|NFATC2|NFATC4|CCR1|CREB5|PRKCB|ADCY8|PDGFRA|ITGB3|AKT1|GNG4|RBP3|VEGFA|CDK6|ARHGEF12|CXCL12|BCAR1	0.278538
Purine metabolism	KEGG PATHWAY	hsa00230	11	130	GUCY2D|PDE1C|PDE3A|PDE1A|ADCY8|XDH|PDE6B|PDE6C|PDE9A|NT5C1A|PDE4B	0.280333
Antigen processing and presentation	KEGG PATHWAY	hsa04612	7	77	CD74|KIR2DL3|KIR2DL4|CD8A|KIR3DL2|CD8B|HLA-DQA2	0.281537
FoxO signaling pathway	KEGG PATHWAY	hsa04068	11	132	TGFB2|SGK2|SGK1|S1PR1|CCND2|G6PC|GRM1|AKT1|CCNG2|FOXG1|BNIP3	0.295772
Mineral absorption	KEGG PATHWAY	hsa04978	5	53	ATP1B2|SLC8A3|SLC34A2|SLC30A1|SLC9A3	0.304772
Small cell lung cancer	KEGG PATHWAY	hsa05222	8	93	LAMA1|LAMA2|LAMA3|BIRC8|AKT1|RBP3|PTGS2|CDK6	0.308267
Butanoate metabolism	KEGG PATHWAY	hsa00650	3	28	HMGCL|ALDH5A1|GAD2	0.312476
Yersinia infection	KEGG PATHWAY	hsa05135	10	121	CCL2|NFATC2|NLRP3|ARHGEF7|ITGA4|ARHGEF12|AKT1|LCP2|WIPF1|BCAR1	0.316632
Bladder cancer	KEGG PATHWAY	hsa05219	4	41	RASSF1|VEGFA|RBP3|MMP2	0.3174
Phenylalanine, tyrosine and tryptophan biosynthesis	KEGG PATHWAY	hsa00400	1	5	IL4I1	0.324452
Pathogenic Escherichia coli infection	KEGG PATHWAY	hsa05130	5	55	TUBB6|TUBA3C|FYN|EZR|KRT18	0.330078
Primary bile acid biosynthesis	KEGG PATHWAY	hsa00120	2	17	CYP7B1|CH25H	0.340522
Nitrogen metabolism	KEGG PATHWAY	hsa00910	2	17	CA3|CA4	0.340522
Glutathione metabolism	KEGG PATHWAY	hsa00480	5	56	ANPEP|GPX5|GSTM5|GPX7|GPX6	0.342808
ErbB signaling pathway	KEGG PATHWAY	hsa04012	7	85	SHC3|PRKCB|CAMK2A|AKT1|EREG|NRG1|PAK7	0.364
Mucin type O-glycan biosynthesis	KEGG PATHWAY	hsa00512	3	31	GALNT9|WBSCR17|GALNT13	0.365509
Progesterone-mediated oocyte maturation	KEGG PATHWAY	hsa04914	8	99	CCNA1|SPDYA|CPEB4|CPEB1|AKT1|SPDYE4|ADCY8|MOS	0.365915
Vitamin B6 metabolism	KEGG PATHWAY	hsa00750	1	6	PSAT1	0.367205
ABC transporters	KEGG PATHWAY	hsa02010	4	45	ABCC11|CFTR|ABCA9|ABCB4	0.375966
Oocyte meiosis	KEGG PATHWAY	hsa04114	10	128	PPP1CC|SPDYA|SPDYE4|PPP2CB|CPEB1|CAMK2A|MOS|REC8|CPEB4|ADCY8	0.376073
Steroid biosynthesis	KEGG PATHWAY	hsa00100	2	19	CYP24A1|DHCR24	0.387118
Glycosaminoglycan degradation	KEGG PATHWAY	hsa00531	2	19	HYAL2|HPSE2	0.387118
Thermogenesis	KEGG PATHWAY	hsa04714	17	231	PRDM16|DPF3|CPT1C|LIPE|CNR1|CREB5|ADCY8|COX4I2|ADRB3|PRKG1|ACTL6B|PRKG2|COX6B2|ATP5G2|SMARCA2|FLG|COX7B2	0.402425
Ether lipid metabolism	KEGG PATHWAY	hsa00565	4	47	PLA2G4C|PLA2G7|ENPP2|PLA2G4F	0.405142
Pentose and glucuronate interconversions	KEGG PATHWAY	hsa00040	3	34	UGT2B15|AKR1B1|UGT2B11	0.41781
Chronic myeloid leukemia	KEGG PATHWAY	hsa05220	6	76	TGFB2|SHC3|MECOM|AKT1|RBP3|CDK6	0.418176
Arginine and proline metabolism	KEGG PATHWAY	hsa00330	4	50	CKM|P4HA3|ABP1|ADC	0.448351
Alanine, aspartate and glutamate metabolism	KEGG PATHWAY	hsa00250	3	36	ALDH5A1|IL4I1|GAD2	0.451882
Starch and sucrose metabolism	KEGG PATHWAY	hsa00500	3	36	AGL|GBA3|G6PC	0.451882
Other types of O-glycan biosynthesis	KEGG PATHWAY	hsa00514	2	22	LFNG|ST6GAL2	0.45407
Mitophagy - animal	KEGG PATHWAY	hsa04137	5	65	MITF|ATG9B|RBP3|FIS1|BNIP3	0.457171
Phagosome	KEGG PATHWAY	hsa04145	11	152	TUBA3C|MARCO|TUBB6|COMP|THBS4|THBS2|ITGB3|CD36|TCIRG1|COLEC11|HLA-DQA2	0.457524
Fc gamma R-mediated phagocytosis	KEGG PATHWAY	hsa04666	7	94	DOCK2|PRKCB|AKT1|PLA2G4C|HCK|PLA2G4F|GSN	0.458315
Thyroid cancer	KEGG PATHWAY	hsa05216	3	37	TCF4|TCF7|NTRK1	0.468609
Allograft rejection	KEGG PATHWAY	hsa05330	3	38	IL12B|HLA-DQA2|CD40	0.485101
Glycolysis / Gluconeogenesis	KEGG PATHWAY	hsa00010	5	68	ALDH3B2|ALDOB|G6PC|GAPDHS|LDHB	0.494246
Epstein-Barr virus infection	KEGG PATHWAY	hsa05169	14	201	CCND2|CCNA1|EIF2AK2|RUNX3|VIM|AKT1|RBP3|JAK3|CDK6|CD40|PSMD12|CD247|HLA-DQA2|BLNK	0.495419
Endocrine resistance	KEGG PATHWAY	hsa01522	7	98	SHC3|ESR1|ADCY8|AKT1|RBP3|DLL3|MMP2	0.499425
Renal cell carcinoma	KEGG PATHWAY	hsa05211	5	69	PAK7|AKT1|TGFB2|ETS1|VEGFA	0.506397
Phosphatidylinositol signaling system	KEGG PATHWAY	hsa04070	7	99	DGKZ|INPP5F|PRKCB|DGKI|PLCE1|PLCD1|DGKG	0.509551
Synthesis and degradation of ketone bodies	KEGG PATHWAY	hsa00072	1	10	HMGCL	0.512827
Sulfur metabolism	KEGG PATHWAY	hsa00920	1	10	SELENBP1	0.512827
alpha-Linolenic acid metabolism	KEGG PATHWAY	hsa00592	2	25	PLA2G4C|PLA2G4F	0.516621
Glycosylphosphatidylinositol (GPI)-anchor biosynthesis	KEGG PATHWAY	hsa00563	2	25	PIGS|GPLD1	0.516621
Glycine, serine and threonine metabolism	KEGG PATHWAY	hsa00260	3	40	PSAT1|AOC2|BHMT	0.517317
Colorectal cancer	KEGG PATHWAY	hsa05210	6	86	TCF4|TCF7|TGFB2|DCC|AKT1|EREG	0.529827
Graft-versus-host disease	KEGG PATHWAY	hsa05332	3	41	KIR2DL3|KIR3DL2|HLA-DQA2	0.533011
Folate biosynthesis	KEGG PATHWAY	hsa00790	2	26	AKR1B1|ALPL	0.536386
Ubiquinone and other terpenoid-quinone biosynthesis	KEGG PATHWAY	hsa00130	1	11	HPD	0.543662
Huntington disease	KEGG PATHWAY	hsa05016	13	193	DNAH14|TBPL2|BDNF|DNAH5|CREB5|GRIN2B|COX4I2|TAF4B|GRM5|COX6B2|ATP5G2|GRIN1|COX7B2	0.544749
NOD-like receptor signaling pathway	KEGG PATHWAY	hsa04621	12	178	CCL2|CXCL1|NLRP7|CXCL3|NLRP3|PYDC2|AIM2|IFI16|TRPC7|CCK|CASR|PSTPIP1	0.545085
Hepatitis B	KEGG PATHWAY	hsa05161	11	163	NFATC2|PRKCB|NFATC4|CCNA1|EGR2|CREB5|HSPG2|TGFB2|AKT1|RBP3|JAK3	0.545532
Porphyrin and chlorophyll metabolism	KEGG PATHWAY	hsa00860	3	42	UGT2B15|FXN|UGT2B11	0.548411
Collecting duct acid secretion	KEGG PATHWAY	hsa04966	2	27	TCIRG1|ATP4A	0.555587
Ascorbate and aldarate metabolism	KEGG PATHWAY	hsa00053	2	27	UGT2B15|UGT2B11	0.555587
Endometrial cancer	KEGG PATHWAY	hsa05213	4	58	AKT1|TCF7|CTNNA2|TCF4	0.557534
Influenza A	KEGG PATHWAY	hsa05164	11	167	CCL2|PRKCB|NLRP3|TMPRSS2|EIF2AK2|IL12B|PRSS1|AKT1|PRSS3|CDK6|HLA-DQA2	0.576281
Pancreatic cancer	KEGG PATHWAY	hsa05212	5	75	AKT1|TGFB2|RBP3|VEGFA|CDK6	0.576555
Glucagon signaling pathway	KEGG PATHWAY	hsa04922	7	106	CPT1C|CREB5|G6PC|CAMK2A|SLC2A2|AKT1|LDHB	0.578161
Measles	KEGG PATHWAY	hsa05162	9	138	IL2RB|CCND2|EIF2AK2|IL12B|TP73|AKT1|JAK3|CDK6|CD46	0.589101
Hippo signaling pathway - multiple species	KEGG PATHWAY	hsa04392	2	29	RASSF1|RASSF6	0.592266
Basal transcription factors	KEGG PATHWAY	hsa03022	3	45	TBPL2|TAF4B|MNAT1	0.592758
GnRH signaling pathway	KEGG PATHWAY	hsa04912	6	93	PRKCB|ADCY8|CAMK2A|PLA2G4C|MMP2|PLA2G4F	0.602382
HIF-1 signaling pathway	KEGG PATHWAY	hsa04066	7	109	PRKCB|CAMK2A|AKT1|VEGFA|ALDOB|LDHB|FLT1	0.606111
Alzheimer disease	KEGG PATHWAY	hsa05010	11	171	COX4I2|RYR3|GRIN2B|GRIN2C|GRIN2A|CAPN2|SNCA|COX6B2|ATP5G2|GRIN1|COX7B2	0.606115
Pentose phosphate pathway	KEGG PATHWAY	hsa00030	2	30	ALDOB|H6PD	0.609738
Sphingolipid metabolism	KEGG PATHWAY	hsa00600	3	47	ACER1|ASAH1|SPP2	0.620704
Circadian rhythm	KEGG PATHWAY	hsa04710	2	31	CSNK1D|RORB	0.626633
Galactose metabolism	KEGG PATHWAY	hsa00052	2	31	AKR1B1|G6PC	0.626633
Valine, leucine and isoleucine degradation	KEGG PATHWAY	hsa00280	3	48	HMGCL|IL4I1|BCAT1	0.634177
Notch signaling pathway	KEGG PATHWAY	hsa04330	3	48	DTX4|DLL3|LFNG	0.634177
Autophagy - animal	KEGG PATHWAY	hsa04140	8	128	VAMP8|PPP2CB|AKT1|DEPDC6|PRKCQ|ATG9B|PRAP1|BNIP3	0.634977
Glycerophospholipid metabolism	KEGG PATHWAY	hsa00564	6	97	DGKZ|DGKG|DGKI|AGPAT3|PLA2G4C|PLA2G4F	0.640981
Autophagy - other	KEGG PATHWAY	hsa04136	2	32	ATG9B|PPP2CB	0.642953
Fructose and mannose metabolism	KEGG PATHWAY	hsa00051	2	33	AKR1B1|ALDOB	0.658704
Vibrio cholerae infection	KEGG PATHWAY	hsa05110	3	50	TCIRG1|CFTR|KCNQ1	0.660108
Salmonella infection	KEGG PATHWAY	hsa05132	5	83	CXCL1|SCT|CXCL3|PFN3|FLNC	0.661146
Thiamine metabolism	KEGG PATHWAY	hsa00730	1	16	ALPL	0.670926
Endocytosis	KEGG PATHWAY	hsa04144	15	244	CAPZB|PDGFRA|IL2RB|RAB11FIP4|DNAJC6|PARD6B|EPN3|PRKCZ|DNM3|IQSEC1|WIPF1|SNX32|CAV2|CHMP1A|CAV1	0.67531
Prion diseases	KEGG PATHWAY	hsa05020	2	35	FYN|C1QA	0.688525
Autoimmune thyroid disease	KEGG PATHWAY	hsa05320	3	53	TPO|CD40|HLA-DQA2	0.696459
Epithelial cell signaling in Helicobacter pylori infection	KEGG PATHWAY	hsa05120	4	70	CXCL1|TCIRG1|CXCL3|JAM2	0.6965
2-Oxocarboxylic acid metabolism	KEGG PATHWAY	hsa01210	1	18	BCAT1	0.711271
Longevity regulating pathway	KEGG PATHWAY	hsa04211	5	89	AKT1|CREB5|ADCY8|CAMK4|SESN3	0.716898
Cell cycle	KEGG PATHWAY	hsa04110	7	124	TGFB2|CCNA1|CCND2|SFN|RBP3|CDK6|BUB1B	0.729551
mRNA surveillance pathway	KEGG PATHWAY	hsa03015	5	91	PPP2CB|GSPT1|ACIN1|PPP1CC|PPP2R2B	0.733958
Pyrimidine metabolism	KEGG PATHWAY	hsa00240	3	57	DPYS|UMPS|NT5C1A	0.740231
One carbon pool by folate	KEGG PATHWAY	hsa00670	1	20	ALDH1L1	0.746671
Glycosaminoglycan biosynthesis - chondroitin sulfate / dermatan sulfate	KEGG PATHWAY	hsa00532	1	20	CHST13	0.746671
Ferroptosis	KEGG PATHWAY	hsa04216	2	40	ALOX15|FTMT	0.753732
Necroptosis	KEGG PATHWAY	hsa04217	9	162	NLRP3|EIF2AK2|CAMK2A|ALOX15|JAK3|PLA2G4C|CHMP1A|PLA2G4F|CAPN2	0.760797
Terpenoid backbone biosynthesis	KEGG PATHWAY	hsa00900	1	22	NUS1	0.777732
Non-alcoholic fatty liver disease (NAFLD)	KEGG PATHWAY	hsa04932	8	149	COX4I2|CYP2E1|LEPR|LEP|AKT1|COX6B2|XBP1|COX7B2	0.783115
Longevity regulating pathway - multiple species	KEGG PATHWAY	hsa04213	3	62	AKT1|FOXA2|ADCY8	0.787707
Mismatch repair	KEGG PATHWAY	hsa03430	1	23	RPA2	0.791804
Fatty acid degradation	KEGG PATHWAY	hsa00071	2	44	CPT1C|ACADL	0.79708
Apoptosis	KEGG PATHWAY	hsa04210	7	136	TUBA3C|NGF|NTRK1|SPTA1|AKT1|MCL1|CAPN2	0.806962
Peroxisome	KEGG PATHWAY	hsa04146	4	83	HMGCL|HAO1|PMP22|XDH	0.808359
Ubiquitin mediated proteolysis	KEGG PATHWAY	hsa04120	7	137	UBE4B|NHLRC1|WWP2|AIRE|BIRC8|UBA7|RHOBTB2	0.812562
Nucleotide excision repair	KEGG PATHWAY	hsa03420	2	47	MNAT1|RPA2	0.825012
Lysosome	KEGG PATHWAY	hsa04142	6	123	ASAH1|CTSE|CTSG|TCIRG1|CLN5|LAMP3	0.832463
Amino sugar and nucleotide sugar metabolism	KEGG PATHWAY	hsa00520	2	48	CHIT1|UAP1L1	0.833525
Staphylococcus aureus infection	KEGG PATHWAY	hsa05150	3	68	FPR1|HLA-DQA2|C1QA	0.834927
Shigellosis	KEGG PATHWAY	hsa05131	3	68	PFN3|ELMO1|CCK	0.834927
Herpes simplex virus 1 infection	KEGG PATHWAY	hsa05168	28	492	CCL2|CD74|ZNF334|ZNF177|IL12B|AKT1|ZNF30|ZNF879|ZNF354C|ZNF454|SFRS5|ZIK1|ZNF285A|ZNF436|ZNF283|ZNF677|ITGB3|ZNF208|ZNF300|ZNF85|ZNF611|PPP1CC|ZNF735|ZNF716|EIF2AK2|ZNF132|HLA-DQA2|ZNF560	0.836298
Fatty acid elongation	KEGG PATHWAY	hsa00062	1	27	ACOT7	0.839733
Biosynthesis of unsaturated fatty acids	KEGG PATHWAY	hsa01040	1	27	ACOT7	0.839733
N-Glycan biosynthesis	KEGG PATHWAY	hsa00510	2	50	MGAT1|ST6GAL2	0.849436
Glyoxylate and dicarboxylate metabolism	KEGG PATHWAY	hsa00630	1	30	HAO1	0.86829
Citrate cycle (TCA cycle)	KEGG PATHWAY	hsa00020	1	30	OGDHL	0.86829
Inositol phosphate metabolism	KEGG PATHWAY	hsa00562	3	74	PLCE1|INPP5F|PLCD1	0.872802
Biosynthesis of amino acids	KEGG PATHWAY	hsa01230	3	75	PSAT1|ALDOB|BCAT1	0.878307
Systemic lupus erythematosus	KEGG PATHWAY	hsa05322	6	133	CD40|C1QA|CTSG|GRIN2B|GRIN2A|HLA-DQA2	0.879844
Oxidative phosphorylation	KEGG PATHWAY	hsa00190	6	133	ATP4A|TCIRG1|COX4I2|COX6B2|COX7B2|ATP5G2	0.879844
Carbon metabolism	KEGG PATHWAY	hsa01200	5	117	PSAT1|HAO1|ALDOB|OGDHL|H6PD	0.891359
Base excision repair	KEGG PATHWAY	hsa03410	1	33	MPG	0.891761
Apoptosis - multiple species	KEGG PATHWAY	hsa04215	1	33	BIRC8	0.891761
Fatty acid metabolism	KEGG PATHWAY	hsa01212	2	57	CPT1C|ACADL	0.894784
Insulin signaling pathway	KEGG PATHWAY	hsa04910	6	137	LIPE|PPP1CC|SHC3|G6PC|AKT1|PRKCZ	0.895357
Propanoate metabolism	KEGG PATHWAY	hsa00640	1	34	LDHB	0.898616
Lysine degradation	KEGG PATHWAY	hsa00310	2	59	NSD1|PRDM6	0.90519
DNA replication	KEGG PATHWAY	hsa03030	1	36	RPA2	0.911051
Toll-like receptor signaling pathway	KEGG PATHWAY	hsa04620	4	104	AKT1|TLR1|IL12B|CD40	0.916439
Viral carcinogenesis	KEGG PATHWAY	hsa05203	9	201	TBPL2|CCND2|CCNA1|EGR2|CREB5|EIF2AK2|JAK3|CDK6|GSN	0.92014
Pyruvate metabolism	KEGG PATHWAY	hsa00620	1	39	LDHB	0.926904
Homologous recombination	KEGG PATHWAY	hsa03440	1	41	RPA2	0.93587
Human immunodeficiency virus 1 infection	KEGG PATHWAY	hsa05170	9	212	NFATC2|NFATC4|PRKCB|APOBEC3C|AKT1|GNG4|CD247|TNFRSF1B|PAK7	0.943744
Vasopressin-regulated water reabsorption	KEGG PATHWAY	hsa04962	1	44	CREB5	0.947301
Proteasome	KEGG PATHWAY	hsa03050	1	45	PSMD12	0.950639
Platinum drug resistance	KEGG PATHWAY	hsa01524	2	73	AKT1|GSTM5	0.955074
Protein processing in endoplasmic reticulum	KEGG PATHWAY	hsa04141	6	165	UBE4B|EIF2AK2|CAPN2|FBXO6|SEC31B|XBP1	0.963046
RNA degradation	KEGG PATHWAY	hsa03018	2	79	EXOSC2|BTG3	0.967641
Fanconi anemia pathway	KEGG PATHWAY	hsa03460	1	54	RPA2	0.972612
Cytosolic DNA-sensing pathway	KEGG PATHWAY	hsa04623	1	63	AIM2	0.984805
RNA transport	KEGG PATHWAY	hsa03013	5	165	EIF3J|ACIN1|POM121L2|FXR2|EEF1A2	0.984845
Aminoacyl-tRNA biosynthesis	KEGG PATHWAY	hsa00970	1	66	TARSL2	0.987515
RIG-I-like receptor signaling pathway	KEGG PATHWAY	hsa04622	1	70	IL12B	0.990392
Ribosome biogenesis in eukaryotes	KEGG PATHWAY	hsa03008	2	105	RBM28|NGB	0.992506
Spliceosome	KEGG PATHWAY	hsa03040	3	135	SFRS5|ACIN1|TRA2B	0.993598
