# Supplementary material for: Classification of Subgroups with Immune Characteristics Based on DNA Methylation in Luminal Breast Cancer
Source: Int J Mol Sci. 2022 Oct 22;23(21):12747. doi: 10.3390/ijms232112747 (PMC9658742; doi:10.3390/ijms232112747)
Supplement: Supplementary file 1 [file ijms-23-12747-s001.zip › Table S2_Differences of DNA methylation levels in luminal AB.xlsx]

## Sheet: Sheet1
LumA	p.value	LumB	p.value
CD1E	1.46e-33	LPA	7.93e-19
KIR2DL4	3.83e-33	FGF6	6.06e-18
CD1C	1.43e-32	DEFB121	1.61e-17
DEFB115	1.7e-32	DEFB131	1.44e-16
FGF6	3.2e-32	DARC	1.53e-16
DEFB118	6e-32	CD1C	4.3e-16
CD1A	6.02e-31	TSLP	6.56e-16
TSLP	1.95e-30	FGF23	1.13e-15
REG1A	2e-30	DEFB118	2.38e-15
DEFB116	3.39e-30	CD1A	3.16e-15
MARCO	2.26e-28	MARCO	4.77e-15
RNASE3	3.12e-28	RNASE3	4.88e-15
TCHHL1	3.81e-28	CCL11	5.07e-15
LPA	5.68e-28	REG3G	8.63e-15
DEFB121	1.85e-27	CD1D	1.46e-14
CMKLR1	4.13e-25	KIR2DL3	1.46e-14
KIR3DL2	8.34e-25	SEMG1	2.38e-14
DEFB123	1.63e-24	CD1E	4.41e-14
MC3R	1.4e-23	NTF3	4.93e-14
TNFSF18	1.67e-23	GLP2R	6.06e-14
CD1B	1.95e-23	REG1A	1.24e-13
CD1D	3.17e-23	KIR3DL2	1.32e-13
IL5RA	4.38e-23	CD1B	1.82e-13
RASGRP3	8.28e-23	BMP10	3.61e-13
PGLYRP3	8.79e-23	DEFB116	4.38e-13
S100A8	2.85e-22	GHRHR	4.75e-13
GUCA2A	1.15e-20	TCHHL1	5.07e-13
BMP10	1.82e-20	KIR2DL4	5.38e-13
FABP9	2.02e-20	PGLYRP3	5.81e-13
IL17A	2.28e-20	SLC10A2	7.97e-13
TNFSF4	2.89e-20	GPHB5	8.3e-13
CCL11	3.02e-20	DEFB125	9.05e-13
LCP2	5.47e-20	IL17A	1.65e-12
DEFB132	1.93e-19	CCL7	2.3e-12
CCL8	1.03e-18	TNFSF4	2.78e-12
NODAL	3.04e-18	FPR1	3.07e-12
CXCL17	2.32e-17	DEFB115	4.37e-12
IL21	3.58e-17	RASGRP3	4.67e-12
BCL10	6.3e-17	DEFB123	4.88e-12
CD247	6.7e-17	CD247	1.43e-11
PGLYRP1	2.12e-16	APOH	4.11e-11
HLA-DQA2	1.29e-15	KLK3	8.9e-11
GPHB5	1.79e-15	CCL8	9.84e-11
ITK	2.35e-15	PGLYRP4	1.13e-10
MMP12	9.26e-15	TNFSF18	1.4e-10
GREM2	1.86e-14	RETNLB	1.58e-10
CD48	2.1e-14	ITK	1.66e-10
ESR1	3.08e-14	CD244	2.18e-10
DEFB135	4.55e-14	IL5RA	2.39e-10
BLNK	9.83e-14	HTR3A	3.43e-10
NTF3	1.72e-12	PLUNC	5.96e-10
SEMA3C	1.77e-12	SPINLW1	6.82e-10
BMPR1B	3.01e-12	MC3R	7.27e-10
CX3CL1	4.2e-12	CTSE	7.96e-10
VEGFA	5.9e-12	NOX3	8.8e-10
CCL13	7.05e-12	IL21	9.15e-10
CCL1	7.6e-12	IL211	9.15e-10
DEFB125	1.03e-11	CSH1	1.33e-09
TMPRSS6	1.64e-11	GREM2	2.99e-09
VCAM1	1.78e-11	LCP2	3.2e-09
SCT	2.6e-11	S100A7A	3.32e-09
CD74	1.18e-10	HNF4A	3.71e-09
SEMA3B	1.65e-10	S100A12	4.04e-09
CTSE	4.37e-10	DEFB135	4.29e-09
CSK	5.38e-10	APLNR	4.95e-09
VEGFC	5.72e-10	CHIT1	6.51e-09
IL15	6.82e-10	PROK1	8.04e-09
PRLR	8.89e-10	TRHR	8.61e-09
EIF2AK2	1.14e-09	FABP9	2.05e-08
TRH	1.88e-09	CCL13	2.29e-08
IL23A	2e-09	CMKLR1	2.48e-08
HCK	2.72e-09	DCD	2.98e-08
LYN	2.74e-09	CD48	3.24e-08
IDO1	8.49e-09	CTSG	3.37e-08
MALT1	8.99e-09	AKT1	5.73e-08
NFATC4	1.7e-08	CCL1	6.34e-08
S100Z	1.7e-08	FAM19A1	6.34e-08
FGF8	2.42e-08	CCL20	6.83e-08
LEP	3.63e-08	S100A8	6.94e-08
FGF2	4.86e-08	DEFB132	7.03e-08
THPO	7.34e-08	HLA-DQA2	7.82e-08
CXCR1	9.9e-08	FCN2	1.14e-07
PGC	1.18e-07	HFE2	1.25e-07
IL32	1.41e-07	CLDN4	1.57e-07
PROC	1.47e-07	S100A7L2	1.7e-07
IL20	1.6e-07	IFNG	1.72e-07
APOBEC3C	2.75e-07	BMPR1B	1.78e-07
CD8A	3.44e-07	CCL2	2.08e-07
SEMA7A	3.72e-07	CMA1	4.97e-07
PLTP	4.88e-07	GUCA2A	5.66e-07
SEMA4A	5.42e-07	CGB1	6.23e-07
AGTR1	5.6e-07	GPR77	7.67e-07
CD86	6.54e-07	IL26	7.75e-07
STC2	2.14e-06	PDGFB	1.13e-06
HMGB1	2.84e-06	CTF1	1.31e-06
ACVR2A	3.1e-06	XCL1	1.83e-06
KL	3.63e-06	BMP5	2.42e-06
TANK	3.72e-06	SEMG2	2.61e-06
PRKCQ	6.2e-06	SEMA3C	3.71e-06
ADM2	8.7e-06	NODAL	4.36e-06
PRLHR	9.1e-06	IFNA8	4.6e-06
MTNR1B	1.18e-05	NOS2	4.76e-06
S1PR1	1.66e-05	C20orf114	8.21e-06
CD40	1.98e-05	EIF2AK2	8.44e-06
UCN	2.33e-05	GALP	9.14e-06
TNFRSF10D	3.7e-05	PAK7	1.25e-05
S100A16	8.61e-05	VEGFC	1.4e-05
TGFB2	0.000121	AZGP1	1.43e-05
S100P	0.000136	DEFB126	1.87e-05
NPY	0.000207	PMP2	2.03e-05
CCR5	0.000213	PTPN6	2.32e-05
LEAP2	0.000336	MMP12	2.67e-05
CRH	0.000356	CMTM5	2.77e-05
LEPR	0.000378	CBLC	3.32e-05
FABP7	0.000424	SEMA4A	3.86e-05
FGF9	0.00043	SH2D1B	4.11e-05
ACVRL1	0.000578	NFATC2	4.95e-05
EDNRB	0.000597	CALCB	4.96e-05
FCGRT	0.000908	SPP1	5.48e-05
OXT	0.001101	IL15	7.32e-05
PTGDS	0.001101	IL16	8.25e-05
GDF5	0.001106	LGR6	8.75e-05
TNFSF11	0.001168	CMTM2	9.07e-05
PENK	0.00197	CXCL17	9.57e-05
CSF2RB	0.00201	S100A14	0.000103
SCGB3A1	0.002051	NOS1	0.000104
PDGFRB	0.002361	IL12B	0.000115
NOX4	0.003175	S100P	0.000117
FGF14	0.004141	CECR1	0.00012
AMH	0.004302	CLEC11A	0.000126
NFYC	0.00457	BPIL1	0.000129
GALR2	0.008754	HLA-DPB1	0.000129
SLIT2	0.009829	FGF4	0.000147
CCK	0.018805	PGC	0.000195
IL1B	0.019547	ESR1	0.000224
LEFTY2	0.02038	ANGPT1	0.000233
PRKCB	0.020709	CAMP	0.000249
RBP1	0.02487	CCL24	0.000302
GFAP	0.026629	PTGS2	0.000399
FABP3	0.031979	THPO	0.000426
TAC1	0.035613	LYN	0.00045
GHSR	0.037558	IGF1	0.000479
CARD11	0.051082	AGTR1	0.000522
NR2E1	0.054468	EPGN	0.000533
DKK1	0.059979	APOM	0.000591
IFNGR2	0.060637	PIK3R1	0.000597
VIPR2	0.06214	PTH2	0.000643
PTGDR	0.062309	BCL10	0.000692
CHGA	0.070124	CCR5	0.000718
NCK1	0.074324	FURIN	0.000766
IGF1	0.079756	MSR1	0.001049
BDNF	0.088169	SCT	0.001168
SST	0.104535	GDF15	0.001177
PDGFRA	0.105569	CST4	0.001277
GRP	0.117195	HTR1A	0.001367
CRHR2	0.120613	IL20RA	0.001526
LHCGR	0.12148	CD86	0.001668
S100A3	0.125886	PRLR	0.001906
PLCG1	0.126782	S100Z	0.002013
GREM1	0.129499	EDNRB	0.002568
EPO	0.139207	APOBEC3A	0.002717
LIMS1	0.142128	S100A3	0.003536
TNFSF13B	0.144764	A2M	0.004187
TGFBR1	0.154633	TSHR	0.004253
POMC	0.201373	BLNK	0.00462
PTGS2	0.21	MALT1	0.005485
PI15	0.232259	FGF3	0.006079
FLT4	0.237	MC4R	0.006544
FLT1	0.337792	FGF8	0.00671
CLEC11A	0.377413	SEMA3B	0.007457
FAM3B	0.384613	CXCL1	0.009024
VIM	0.389239	RBP1	0.009559
FGF3	0.431669	VCAM1	0.009948
TSHR	0.436623	WFDC2	0.010284
CMTM5	0.450954	CRHR2	0.010652
PIK3R5	0.467022	TNFRSF10C	0.010731
NMBR	0.479653	GRP	0.011576
OPRM1	0.599564	HLA-DPA1	0.011676
ELN	0.655921	CARD11	0.011806
PCSK1	0.685765	S100A10	0.012715
EDN3	0.851935	GFAP	0.013472
DUOX2	0.866121	SYTL1	0.013542
NR5A2	0.880351	PROC	0.016049
NRG1	0.94336	CXCR1	0.017564
		NPY	0.018373
		FGF5	0.019654
		SLIT2	0.020129
		IL1B	0.02036
		CRABP1	0.020661
		RARA	0.021304
		CRIM1	0.021633
		TAC1	0.023349
		PLCG1	0.024182
		VEGFA	0.031445
		CALCR	0.032243
		EPOR	0.032998
		PCSK1	0.033194
		IL20	0.033454
		ACTA1	0.035258
		RXFP3	0.035327
		TRH	0.036815
		GDF10	0.038165
		PDGFRB	0.039621
		GHSR	0.041106
		S100B	0.042825
		CD74	0.043542
		LTA	0.045746
		FGF1	0.045846
		SST	0.046499
		FABP5	0.046854
		PDCD1	0.048217
		FGF14	0.048255
		LHCGR	0.048447
		IL18	0.050848
		ISG20	0.05221
		FABP7	0.054653
		SLC40A1	0.058722
		FGF10	0.059723
		CD8B	0.067907
		RORB	0.068155
		PTGER2	0.071134
		FGF12	0.073463
		BMP3	0.073475
		GLP1R	0.074491
		HMGB1	0.074736
		CSK	0.075434
		PGLYRP1	0.078028
		S100A16	0.078889
		ADIPOQ	0.083685
		SCTR	0.08417
		TNF	0.085281
		STC2	0.08549
		CALCA	0.088894
		OXT	0.097079
		TCF4	0.098154
		ELN	0.098723
		GDF6	0.103042
		BDNF	0.110126
		SYK	0.118325
		OPRM1	0.120187
		VAV3	0.125769
		NPPC	0.126864
		TNFSF11	0.126868
		MIA	0.126931
		CX3CL1	0.127125
		NOX4	0.127535
		CD8A	0.1343
		EDN3	0.13708
		FAM19A4	0.139874
		CSF2RB	0.140274
		CRH	0.140877
		SEMA4B	0.143206
		ULBP3	0.144941
		CD4	0.151477
		RNASE7	0.152724
		ANXA6	0.153773
		NFATC4	0.154314
		FGF19	0.154598
		SLC22A17	0.155103
		NRG1	0.15776
		FGF9	0.166596
		TNFRSF11B	0.168444
		PTH1R	0.172406
		ULBP1	0.173649
		S100A5	0.17389
		ACVR2A	0.175687
		TAP1	0.17908
		EPO	0.188575
		HLA-H	0.19333
		HLA-H1	0.19333
		SHC1	0.196588
		CSF3	0.19911
		AMH	0.201012
		TGFBR1	0.201146
		PI15	0.210652
		FGF2	0.227437
		FGF21	0.227437
		LEP	0.230198
		LEPR	0.234333
		FLT4	0.236893
		GDF5	0.245994
		NFYC	0.24879
		LEAP2	0.24886
		PTGDR	0.258087
		NR5A2	0.261513
		PENK	0.264255
		RORA	0.268528
		ESRRG	0.26856
		IL15RA	0.274015
		FGFR1	0.275734
		EDNRA	0.283434
		TNFRSF8	0.29013
		PRKCG	0.290294
		ROBO3	0.295373
		VIPR1	0.302609
		GDNF	0.304937
		TLR1	0.312791
		KCNH2	0.319109
		SDC1	0.322098
		TNFSF13B	0.326672
		CXCL5	0.342242
		PDGFRA	0.34496
		NCK1	0.34721
		CDKN1A	0.354959
		GAL	0.371069
		FLT1	0.372221
		TUBB4	0.374669
		LEFTY2	0.375299
		TNFRSF1B	0.376282
		MUC4	0.37734
		IL11RA	0.379844
		NR2F2	0.385042
		PTGDS	0.386108
		LTBP3	0.392341
		LTBP31	0.392341
		BST2	0.399654
		NGF	0.403333
		TNFRSF10D	0.409575
		NFATC3	0.410499
		ACVRL1	0.43932
		IFNGR2	0.45081
		BMP4	0.460674
		RFXANK	0.473588
		KL	0.478348
		LTB	0.479355
		FAM3B	0.479407
		CHGB	0.480811
		TMPRSS6	0.482308
		NR2E1	0.490188
		DKK1	0.491641
		LIMS1	0.491984
		PRLHR	0.497151
		LTBP4	0.510844
		FAM19A5	0.515811
		CD81	0.517834
		PDGFA	0.529398
		CCL28	0.52982
		PRKCQ	0.530813
		TANK	0.53288
		DES	0.534573
		NR2F1	0.534989
		IL23A	0.538637
		IDO1	0.554459
		COLEC12	0.554825
		GALR2	0.557104
		CGB7	0.56216
		S100A2	0.564393
		CD40	0.566065
		MTNR1A	0.568148
		MCHR2	0.569445
		PAK2	0.572173
		BPI	0.587896
		BMP8A	0.604673
		CABP1	0.612135
		NMBR	0.624027
		ADM2	0.632356
		HLA-B	0.637143
		CCK	0.639142
		SEMA7A	0.639386
		NPPB	0.639636
		CXCL6	0.640016
		CXCL3	0.640491
		TINAGL1	0.648579
		NRG3	0.673787
		FGF11	0.676238
		IL2RB	0.679334
		CCR1	0.681459
		POMC	0.685167
		FCGRT	0.687319
		ADRB1	0.690874
		DUOX2	0.695887
		PIK3R5	0.698087
		FGF17	0.699817
		PLXNB2	0.701531
		EREG	0.70218
		CMTM3	0.702204
		BMP8B	0.71331
		BCL3	0.717372
		VIM	0.725264
		PTH2R	0.741841
		CXCL12	0.742496
		CALCRL	0.744235
		FABP3	0.749801
		PRKCB	0.762936
		HCK	0.76417
		GREM1	0.764257
		GDF7	0.76851
		PROK2	0.779475
		IFITM1	0.784953
		PTGFR	0.785568
		MLNR	0.7939
		OPRK1	0.796547
		UCN	0.803989
		MTNR1B	0.804087
		HAMP	0.807097
		SLIT1	0.807387
		BMP2	0.811641
		ROBO1	0.823261
		FYN	0.825107
		S1PR1	0.826785
		PCSK2	0.833762
		VIPR2	0.836291
		HLA-DOA	0.842758
		PDGFD	0.866615
		ICAM2	0.866957
		LGR5	0.871421
		GDF3	0.891145
		IL32	0.91183
		SHC3	0.916045
		PLTP	0.916838
		CXCR2	0.92316
		VGF	0.933648
		CHGA	0.938334
		CSF1	0.941111
		TGFB2	0.941468
		IL1F10	0.947845
		APOBEC3C	0.969797
		PLXNA4	0.975298
