# Supplementary material for: Classification of Subgroups with Immune Characteristics Based on DNA Methylation in Luminal Breast Cancer
Source: Int J Mol Sci. 2022 Oct 22;23(21):12747. doi: 10.3390/ijms232112747 (PMC9658742; doi:10.3390/ijms232112747)
Supplement: Supplementary file 1 [file ijms-23-12747-s001.zip › Table S3_quantitative image features.xlsx]

## Sheet: Sheet1
FileName_HEslice	Height_HEslice	Mean_IdentifyPrimaryObjects_AreaShape_Area	Mean_IdentifyPrimaryObjects_AreaShape_BoundingBoxArea	Mean_IdentifyPrimaryObjects_AreaShape_BoundingBoxMaximum_X	Mean_IdentifyPrimaryObjects_AreaShape_BoundingBoxMaximum_Y	Mean_IdentifyPrimaryObjects_AreaShape_BoundingBoxMinimum_X	Mean_IdentifyPrimaryObjects_AreaShape_BoundingBoxMinimum_Y	Mean_IdentifyPrimaryObjects_AreaShape_Center_X	Mean_IdentifyPrimaryObjects_AreaShape_Center_Y	Mean_IdentifyPrimaryObjects_AreaShape_Compactness	Mean_IdentifyPrimaryObjects_AreaShape_ConvexArea	Mean_IdentifyPrimaryObjects_AreaShape_Eccentricity	Mean_IdentifyPrimaryObjects_AreaShape_EquivalentDiameter	Mean_IdentifyPrimaryObjects_AreaShape_EulerNumber	Mean_IdentifyPrimaryObjects_AreaShape_Extent	Mean_IdentifyPrimaryObjects_AreaShape_FormFactor	Mean_IdentifyPrimaryObjects_AreaShape_MajorAxisLength	Mean_IdentifyPrimaryObjects_AreaShape_MaxFeretDiameter	Mean_IdentifyPrimaryObjects_AreaShape_MaximumRadius	Mean_IdentifyPrimaryObjects_AreaShape_MeanRadius	Mean_IdentifyPrimaryObjects_AreaShape_MedianRadius	Mean_IdentifyPrimaryObjects_AreaShape_MinFeretDiameter	Mean_IdentifyPrimaryObjects_AreaShape_MinorAxisLength	Mean_IdentifyPrimaryObjects_AreaShape_Orientation	Mean_IdentifyPrimaryObjects_AreaShape_Perimeter	Mean_IdentifyPrimaryObjects_AreaShape_Solidity	Mean_IdentifyPrimaryObjects_AreaShape_Zernike_0_0	Mean_IdentifyPrimaryObjects_AreaShape_Zernike_1_1	Mean_IdentifyPrimaryObjects_AreaShape_Zernike_2_0	Mean_IdentifyPrimaryObjects_AreaShape_Zernike_2_2	Mean_IdentifyPrimaryObjects_AreaShape_Zernike_3_1	Mean_IdentifyPrimaryObjects_AreaShape_Zernike_3_3	Mean_IdentifyPrimaryObjects_AreaShape_Zernike_4_0	Mean_IdentifyPrimaryObjects_AreaShape_Zernike_4_2	Mean_IdentifyPrimaryObjects_AreaShape_Zernike_4_4	Mean_IdentifyPrimaryObjects_AreaShape_Zernike_5_1	Mean_IdentifyPrimaryObjects_AreaShape_Zernike_5_3	Mean_IdentifyPrimaryObjects_AreaShape_Zernike_5_5	Mean_IdentifyPrimaryObjects_AreaShape_Zernike_6_0	Mean_IdentifyPrimaryObjects_AreaShape_Zernike_6_2	Mean_IdentifyPrimaryObjects_AreaShape_Zernike_6_4	Mean_IdentifyPrimaryObjects_AreaShape_Zernike_6_6	Mean_IdentifyPrimaryObjects_AreaShape_Zernike_7_1	Mean_IdentifyPrimaryObjects_AreaShape_Zernike_7_3	Mean_IdentifyPrimaryObjects_AreaShape_Zernike_7_5	Mean_IdentifyPrimaryObjects_AreaShape_Zernike_7_7	Mean_IdentifyPrimaryObjects_AreaShape_Zernike_8_0	Mean_IdentifyPrimaryObjects_AreaShape_Zernike_8_2	Mean_IdentifyPrimaryObjects_AreaShape_Zernike_8_4
TCGA-3C-AALI-01Z-00-DX1.F6E9A5DF-D8FB-45CF-B4BD-C6B76294C291-32-101184x74432-3162x2326.png	2326	225.5	523.365	1506.55	1408.45	1484.07	1386.82	1494.8	1397.1	2.89172	334.253	0.819885	16.1128	0.995737	0.462486	0.403131	26.9869	26.9827	4.7001	1.95727	1.68767	14.1266	13.3989	-2.4232	86.7342	0.696278	0.388964	0.0531567	0.114868	0.0601665	0.0348805	0.0214844	0.0236893	0.0297651	0.0266431	0.0171183	0.0171786	0.0120431	0.0126912	0.0139735	0.0150088	0.0156602	0.0103587	0.0107323	0.0101938	0.00801045	0.00858783	0.0093041	0.00945528
TCGA-3C-AALJ-01Z-00-DX1.777C0957-255A-42F0-9EEB-A3606BCF0C96-32-95744x86336-2992x2698.png	2698	253.847	547.188	1496.51	1341.79	1473.59	1319.89	1484.59	1330.35	2.69176	365.266	0.789556	17.039	0.994365	0.490673	0.434069	26.5961	26.7178	5.1642	2.11994	1.85227	15.3742	14.5767	0.598328	88.1996	0.715595	0.433525	0.0562792	0.123941	0.0626788	0.0340963	0.0238322	0.022142	0.0304765	0.0267426	0.016835	0.0174685	0.0133462	0.0121469	0.0136322	0.0147064	0.0156619	0.0101741	0.0107079	0.0105283	0.00878475	0.00858798	0.00925595	0.00934187
TCGA-3C-AALK-01Z-00-DX1.4E6EB156-BB19-410F-878F-FC0EA7BD0B53-32-95488x81920-2984x2560.png	2560	287.347	634.509	1789.68	1237.87	1765.96	1213.42	1777.3	1225.17	2.62061	409.768	0.805918	18.0657	0.992299	0.488119	0.440645	29.149	29.2784	5.4995	2.23674	1.96311	15.7545	14.8553	-0.87983	92.6938	0.727465	0.419509	0.0543181	0.124425	0.0622419	0.0336843	0.0224679	0.0227529	0.0312266	0.0263138	0.0166698	0.0170943	0.0125234	0.0119506	0.013426	0.0146436	0.0151766	0.010042	0.0104094	0.0101109	0.00817727	0.00834143	0.00878252	0.00896888
TCGA-4H-AAAK-01Z-00-DX1.ABF1B042-1970-4E28-8671-43AAD393D2F9-32-73704x77550-2303x2423.png	2423	187.535	442.042	1055.69	1284.38	1035.3	1263.98	1045	1273.65	2.93977	284.985	0.812463	14.8057	0.998255	0.453024	0.393514	24.9102	24.6626	4.24569	1.80783	1.54287	13.252	12.6795	1.5057	80.1922	0.681533	0.389934	0.0527077	0.110117	0.0608042	0.0346164	0.0225504	0.0237093	0.0292111	0.0271949	0.0178117	0.0175528	0.0128846	0.0125038	0.0141511	0.0148384	0.0163734	0.0110069	0.0110396	0.010525	0.00861512	0.00905577	0.00967912	0.00996305
TCGA-5L-AAT0-01Z-00-DX1.5E171263-30BF-4C6B-88A1-E8EA0522A861-32-61752x59840-1929x1870.png	1870	216.509	559.558	1154.46	893.446	1132.88	871.543	1143.12	882.024	2.80049	344.703	0.802814	15.7783	0.996997	0.47164	0.433414	26.6121	26.1859	4.70859	1.97696	1.72312	14.231	13.6163	0.0902143	82.9428	0.703269	0.416538	0.0559017	0.113763	0.0633273	0.0342749	0.0235758	0.0224427	0.0294979	0.027696	0.01708	0.0174578	0.0132612	0.0125956	0.0137269	0.0141974	0.0162679	0.0105639	0.0110128	0.010238	0.00891956	0.00912024	0.00950925	0.00929314
TCGA-5L-AAT1-01Z-00-DX1.F3449A5B-2AC4-4ED7-BF44-4C8946CDB47D-32-89640x79673-2801x2489.png	2489	224.381	522.769	1576.37	1247.68	1552.15	1227.92	1563.73	1237.33	2.63108	320.773	0.8318	16.0376	0.99626	0.472414	0.452341	27.587	27.2713	4.81625	2.02785	1.7735	13.3154	12.7294	10.3452	81.8996	0.725794	0.394279	0.0520945	0.114115	0.0633508	0.0331361	0.0208309	0.0242522	0.0305373	0.0270453	0.0170809	0.0164409	0.0119252	0.0124555	0.0139097	0.0146454	0.0160511	0.0102821	0.0106087	0.00969411	0.00785482	0.00905351	0.00893387	0.00936425
TCGA-5T-A9QA-01Z-00-DX1.B4212117-E0A7-4EF2-B324-8396042ACEC1-32-103584x89511-3237x2797.png	2797	267.829	576.919	1636.27	1397.56	1613.13	1374.83	1624.21	1385.7	2.51372	375.323	0.802101	17.4676	0.994026	0.5011	0.460471	27.7093	27.803	5.38486	2.20764	1.94994	15.1798	14.4138	1.70338	87.816	0.739072	0.432575	0.0559974	0.125209	0.063866	0.0340709	0.0227567	0.0225548	0.0307349	0.0272329	0.0165984	0.0170241	0.0127363	0.0121138	0.0134772	0.0147391	0.0157803	0.00996983	0.010435	0.0101684	0.00829716	0.00846856	0.00895706	0.00907501
TCGA-A1-A0SB-01Z-00-DX1.B34C267B-CAAA-4AB6-AD5C-276C26F997A1-32-112314x82945-3509x2592.png	2592	302.016	624.004	2212.83	1236.8	2189.44	1212.67	2200.65	1224.2	2.20498	402.123	0.796816	18.4488	0.992217	0.518911	0.511877	28.5303	28.7647	5.94233	2.42656	2.15897	15.5862	14.9195	-1.75573	86.8547	0.772446	0.45093	0.0548987	0.132332	0.0651267	0.03238	0.0218124	0.0231385	0.0312382	0.0275877	0.0156971	0.0162798	0.0121695	0.0127227	0.0131786	0.0149124	0.0156967	0.0095513	0.00992605	0.00970952	0.00794942	0.00851414	0.0090918	0.0088702
TCGA-A1-A0SD-01Z-00-DX1.DB17BFA9-D951-42A8-91D2-F4C2EBC6EB9F-32-94075x80287-2939x2508.png	2508	287.351	618.067	1506.06	954.58	1481.97	931.251	1493.48	942.416	2.46559	399.774	0.803356	18.0356	0.993235	0.49889	0.465724	28.5734	28.7553	5.58495	2.28528	2.01757	15.5664	14.7693	-4.49771	89.7504	0.743	0.429861	0.0538244	0.12747	0.0636664	0.0333706	0.0219202	0.0226381	0.0315962	0.0272323	0.0165189	0.0167347	0.0123737	0.0124713	0.0134352	0.0150564	0.0156339	0.00987148	0.0102797	0.00989884	0.00803759	0.00844731	0.00898327	0.00908691
TCGA-A1-A0SE-01Z-00-DX1.04B09232-C6C4-46EF-AA2C-41D078D0A80A-32-122873x73336-3839x2291.png	2291	231.448	510.209	1862.44	1183.33	1839.71	1162.83	1850.57	1172.6	2.50162	325.711	0.802739	16.2941	0.995026	0.497477	0.46802	26.3887	26.2917	5.01493	2.09635	1.84558	13.9851	13.4171	-5.88958	81.1594	0.736869	0.429349	0.0549059	0.122054	0.0638386	0.0329203	0.0230036	0.0231126	0.0302162	0.0275744	0.0165181	0.01702	0.0128137	0.0124807	0.0136053	0.014529	0.0161203	0.0101455	0.0105792	0.0101611	0.00830528	0.00864497	0.0093472	0.00930738
TCGA-A1-A0SF-01Z-00-DX1.7F252D89-EA78-419F-A969-1B7313D77499-32-65276x84727-2039x2647.png	2647	307.668	624.669	907.641	1395.32	885.425	1369.54	896.027	1381.91	2.18345	410.17	0.798727	18.7762	0.991429	0.528441	0.507144	28.9659	29.2578	6.02609	2.45244	2.18687	15.8175	15.0355	4.49079	88.377	0.774479	0.453387	0.0551546	0.136088	0.0655059	0.0324797	0.0223536	0.0232658	0.0317527	0.0271912	0.0157175	0.0164264	0.0125656	0.0120322	0.0128605	0.014918	0.0157271	0.0094049	0.00995579	0.0100014	0.00819473	0.00776514	0.00866754	0.00866025
TCGA-A1-A0SH-01Z-00-DX1.90E71B08-E1D9-4FC2-85AC-062E56DDF17C-32-98874x64427-3089x2013.png	2013	303.069	629.633	1433.54	1113.07	1410.1	1088.57	1421.3	1100.33	2.16459	404.243	0.804756	18.6728	0.990862	0.526157	0.510526	28.9995	29.27	5.97712	2.44018	2.18534	15.6458	14.8676	0.882412	87.654	0.776701	0.449842	0.0550295	0.13583	0.065834	0.0331414	0.0221429	0.0232177	0.0322398	0.027258	0.0157398	0.0164818	0.0123614	0.0119349	0.0129159	0.0148292	0.0157916	0.00950306	0.00983888	0.00983621	0.00794759	0.00794355	0.00862116	0.00865767
TCGA-A1-A0SI-01Z-00-DX1.AB717348-F964-4F29-BBE2-972B7C640432-32-92155x84072-2879x2627.png	2627	285.769	608.079	1551.91	1457.23	1528.09	1433.95	1539.51	1445.08	2.34498	391.231	0.806737	18.0347	0.992918	0.508903	0.483063	28.5894	28.7261	5.64831	2.31419	2.05587	15.3247	14.539	-2.16534	87.7418	0.756754	0.435958	0.0544513	0.129866	0.0643941	0.0332181	0.0221686	0.0224241	0.0315981	0.0269936	0.0159302	0.016683	0.0123347	0.0120002	0.0134152	0.0149659	0.0156284	0.00962315	0.00998361	0.00990456	0.00797366	0.00808565	0.00885811	0.00896413
TCGA-A1-A0SJ-01Z-00-DX1.C196FA66-C376-4016-86BC-3D8E745B3A51-32-108474x89504-3389x2797.png	2797	302.913	615.816	1497.38	1411.44	1474.42	1387.1	1485.43	1398.79	2.20436	406.481	0.786395	18.5512	0.99505	0.52896	0.50713	28.307	28.5154	5.95431	2.42524	2.16508	15.9715	15.1885	0.559821	87.6823	0.770246	0.463509	0.0562057	0.133829	0.0650689	0.0328944	0.0232606	0.0219004	0.0310345	0.0274773	0.0158217	0.0168025	0.0128993	0.0119797	0.0130981	0.0148729	0.0157204	0.00954734	0.010059	0.00983686	0.00833046	0.00828777	0.00881604	0.00873393
TCGA-A1-A0SK-01Z-00-DX1.A44D70FA-4D96-43F4-9DD7-A61535786297-32-125753x75078-3929x2346.png	2346	282.752	579.404	2240.81	1192.91	2218.69	1169.07	2229.27	1180.5	2.3964	387.155	0.783194	17.9342	0.992466	0.515296	0.47488	27.1907	27.4651	5.64124	2.30226	2.04255	15.8188	15.0415	2.92697	87.7246	0.748425	0.455449	0.0556359	0.132472	0.0641894	0.0329142	0.0239114	0.0216756	0.0309011	0.0272298	0.0159745	0.0172801	0.0132863	0.0119974	0.0131275	0.0148257	0.0157474	0.00981888	0.0103218	0.010448	0.00862519	0.00831982	0.00890152	0.00901581
TCGA-A1-A0SN-01Z-00-DX1.5E9B85AE-AFB7-41DC-8A1B-BD6DA39B6540-32-113274x72891-3539x2277.png	2277	240.428	519.237	1451.01	1134.9	1427.06	1114.97	1438.55	1124.45	2.47862	333.514	0.816648	16.5734	0.99773	0.49519	0.463089	26.9538	26.8923	5.10877	2.1277	1.87476	14.0086	13.3859	-3.16069	82.2154	0.739273	0.416736	0.0544868	0.121678	0.0643267	0.0340022	0.0216673	0.0236473	0.0309551	0.0274978	0.0166438	0.0168312	0.0121346	0.0122614	0.0140557	0.0147599	0.0160356	0.0100954	0.0105858	0.00982624	0.0080245	0.00849739	0.00923705	0.00912399
TCGA-A1-A0SQ-01Z-00-DX1.36071264-3407-4224-BCBB-2ED00294569A-32-98874x89810-3089x2806.png	2806	280.542	604.953	1711.72	1222.54	1687.3	1200.25	1699.05	1210.9	2.39888	387.56	0.801552	17.8449	0.992227	0.509872	0.484381	28.2936	28.4013	5.60353	2.29381	2.03313	15.2777	14.5421	3.97849	87.576	0.753672	0.440373	0.0559131	0.127567	0.0645426	0.0333074	0.0225124	0.022607	0.0307085	0.027072	0.0163379	0.0165891	0.012533	0.0121171	0.0132418	0.0146149	0.0155932	0.009871	0.0101569	0.00998816	0.00807504	0.00829053	0.00896249	0.00888998
TCGA-A2-A04N-01Z-00-DX1.9E9B7DB0-1CF1-4631-8292-A9DBCA0BD37C-32-125664x90377-3927x2824.png	2824	282.544	587.294	1550.86	1467.37	1526.34	1445.4	1538.1	1455.87	2.246	383.494	0.807443	18.0337	0.99293	0.52217	0.498381	28.2638	28.4217	5.69886	2.33773	2.09473	15.2319	14.4592	2.12792	86.2461	0.766113	0.44351	0.0545169	0.132796	0.0661915	0.0331025	0.0221533	0.023174	0.0321808	0.0274974	0.0159404	0.0166383	0.0123896	0.0120624	0.0131889	0.0148849	0.0157687	0.00964843	0.0100631	0.00986476	0.00810504	0.00805464	0.00878669	0.00877095
TCGA-A2-A04P-01Z-00-DX1.5B481E02-D269-4732-8FDD-6494E6EE2B71-32-155539x64480-4860x2015.png	2015	323.114	678.731	2352.58	1295.34	2328.64	1269.76	2340.13	1282.06	2.27873	441.136	0.794442	19.1596	0.990079	0.516446	0.49006	29.5848	29.9319	6.09375	2.45896	2.18869	16.6095	15.6426	0.576043	92.3943	0.761074	0.450298	0.0565071	0.133583	0.0640309	0.0335084	0.0230154	0.0218108	0.0312412	0.0267975	0.015952	0.0171028	0.0125154	0.0117071	0.0128621	0.0148242	0.0152457	0.00949802	0.00994962	0.0100056	0.00813468	0.00783154	0.00865142	0.00869727
TCGA-A2-A04Q-01Z-00-DX1.DF7ED6B6-7701-486D-9007-F26B6F0682C4-32-90251x46184-2820x1443.png	1443	320.859	642.112	1481.42	745.649	1456.94	721.946	1468.68	733.313	2.15127	429.731	0.774494	19.1566	0.989723	0.535879	0.514355	28.259	28.5873	6.22606	2.51089	2.23583	16.8757	15.9816	-1.93187	89.8521	0.774267	0.480801	0.0587975	0.137982	0.0651856	0.0329345	0.0240301	0.0209663	0.0309018	0.0272181	0.0156399	0.0168244	0.0131079	0.0114867	0.0125116	0.0145795	0.0154029	0.00948962	0.00994943	0.0101502	0.00857281	0.00799885	0.00855238	0.00855473
TCGA-A2-A04R-01Z-00-DX1.BE3661A3-A2A0-4248-B7D5-D8986E529B6C-32-89055x66452-2782x2076.png	2076	301.67	627.313	1077.17	911.176	1053.48	887.272	1064.79	898.739	2.20701	409.251	0.795606	18.5647	0.989224	0.523884	0.504509	28.4715	28.7316	5.92356	2.41131	2.15979	15.9922	15.1347	1.75833	88.1695	0.767232	0.456181	0.0563147	0.134988	0.065878	0.0331259	0.0228395	0.0219956	0.0315815	0.0275123	0.015906	0.0169373	0.0124877	0.0119356	0.012839	0.0149656	0.0156891	0.00960924	0.00994074	0.00983537	0.00811689	0.00783822	0.00878962	0.00871853
TCGA-A2-A0CK-01Z-00-DX1.C3226BD1-11B0-4034-946A-BAB42958CE85-32-67592x56646-2112x1770.png	1770	276.441	591.812	1078.96	1037.28	1055.48	1014.26	1066.75	1025.28	2.4169	383.74	0.801393	17.7393	0.99087	0.497564	0.466964	27.841	28.0605	5.53776	2.26092	1.99714	15.4553	14.6314	-1.097	87.4263	0.743383	0.432485	0.0559589	0.127792	0.0632182	0.0335945	0.0230737	0.0224904	0.0309834	0.0270062	0.0164655	0.0173691	0.0126752	0.0118868	0.0134231	0.01441	0.0156996	0.0100399	0.0101798	0.010358	0.00822159	0.00830861	0.00897138	0.00878956
TCGA-A2-A0CL-01Z-00-DX1.5342E971-DCD2-42C4-B4FF-E6942A95829E-32-88331x81058-2760x2533.png	2533	326.149	649.467	1334.72	1294.89	1310.4	1270.83	1322.07	1282.37	2.15961	435.667	0.769741	19.278	0.989073	0.53508	0.511133	28.2355	28.5946	6.25017	2.52012	2.24755	17.0445	16.1394	-0.493836	90.421	0.772791	0.484757	0.0572974	0.139708	0.0655169	0.0326941	0.0245845	0.020497	0.0306025	0.0271606	0.0154203	0.0171755	0.0134951	0.0117102	0.0125835	0.0146653	0.0154391	0.00951059	0.00985967	0.0102063	0.00869359	0.00779948	0.00854283	0.00866277
TCGA-A2-A0CM-01Z-00-DX1.AC4901DE-4B6D-4185-BB9F-156033839828-32-95758x76873-2992x2402.png	2402	334.997	675.773	1238.24	1377.27	1213.77	1352.37	1225.51	1364.3	2.21253	450.729	0.778788	19.5169	0.988303	0.531367	0.499249	29.0674	29.5052	6.27832	2.52201	2.24821	17.1515	16.1859	-0.88728	92.8524	0.769837	0.473063	0.0566857	0.138774	0.0646835	0.0329186	0.0238246	0.0208615	0.0308346	0.0269816	0.0154398	0.0170882	0.0128621	0.0115805	0.0126462	0.0147465	0.0153334	0.00948471	0.0100735	0.010045	0.00847755	0.00785786	0.00856471	0.00854033
TCGA-A2-A0CO-01Z-00-DX1.B191DADE-7DEA-4575-AED7-1C52BE15B8D5-32-110414x63320-3450x1978.png	1978	305.093	642.349	1810.05	1188.63	1784.51	1165.82	1796.81	1176.74	2.35703	419.213	0.796445	18.6742	0.984952	0.510926	0.477077	28.8395	29.1315	5.86797	2.37791	2.11109	16.242	15.3086	-0.816271	91.2237	0.753321	0.446841	0.0552498	0.133089	0.0641329	0.0333097	0.0229145	0.0222207	0.0313067	0.0269809	0.015984	0.0171467	0.0125572	0.0118824	0.0130936	0.014935	0.0152736	0.00961469	0.010059	0.0101978	0.00832585	0.00792174	0.00876351	0.0087368
TCGA-A2-A0CP-01Z-00-DX1.ECFD263C-BB17-4ADA-8F2C-654C2AA4C45F-32-68946x59686-2154x1865.png	1865	309.931	637.053	1202.24	987.76	1178.33	963.484	1189.78	975.099	2.17044	416.167	0.789442	18.867	0.987556	0.525777	0.508975	28.6327	28.9775	6.05412	2.45971	2.20176	16.2579	15.3934	1.5629	88.7801	0.771442	0.46242	0.0565621	0.136802	0.0651838	0.0330146	0.0233087	0.0220849	0.0312607	0.0274449	0.0158433	0.017069	0.0126915	0.0119224	0.0127594	0.0149872	0.0155221	0.00944655	0.00988645	0.00997357	0.00814608	0.00776362	0.00870063	0.00865618
TCGA-A2-A0CQ-01Z-00-DX1.4E5FB4E5-A08C-4C87-A3BE-0640A95AE649-32-138850x42695-4339x1334.png	1334	324.618	654.622	2252.23	800.333	2228.64	775.041	2239.95	787.233	2.17648	434.057	0.791392	19.2631	0.99106	0.532329	0.50703	29.172	29.5796	6.19804	2.50266	2.24178	16.6003	15.7256	2.32073	90.8557	0.775437	0.45938	0.0563453	0.13733	0.0651372	0.0333266	0.0229258	0.0224417	0.0313875	0.0272931	0.0157889	0.0170781	0.0125513	0.0116999	0.0126369	0.0150503	0.015384	0.00941046	0.00988756	0.0100306	0.00815434	0.00756987	0.00859082	0.00865424
TCGA-A2-A0CR-01Z-00-DX1.F7D36CA5-A4C6-443A-AEED-5B23CD924FA3-32-154224x91488-4819x2859.png	2859	255.192	581.103	2458	1460.23	2435.7	1436.48	2446.35	1447.86	2.77915	376.631	0.81192	16.9975	0.995267	0.471166	0.419479	27.8619	27.9604	5.0854	2.0866	1.8152	15.0869	14.2304	-2.98479	89.6474	0.702334	0.401996	0.053634	0.118607	0.0616682	0.0342898	0.0218316	0.0232977	0.0308779	0.0264506	0.0170425	0.0170177	0.0125599	0.0122939	0.0137844	0.0148273	0.0155441	0.0102812	0.0106481	0.0102497	0.00829113	0.00884182	0.00916862	0.009411
TCGA-A2-A0CS-01Z-00-DX1.3986B545-63E8-4727-BCC1-701DE947D1FB-32-73929x72247-2310x2257.png	2257	231.1	509.613	1159.26	1134.79	1137.45	1113.54	1147.87	1123.65	2.62755	330.967	0.804801	16.1901	0.993562	0.485738	0.439922	25.9942	26.0104	4.90092	2.03692	1.77581	14.1814	13.5545	-1.03528	83.2378	0.720849	0.418926	0.0556006	0.119648	0.0634972	0.0347557	0.0228291	0.0232897	0.0301634	0.027643	0.0173239	0.0173339	0.0127904	0.0127297	0.0138368	0.0147476	0.0162224	0.0105291	0.0108771	0.0102981	0.00841367	0.00886666	0.00946894	0.00948216
TCGA-A2-A0CT-01Z-00-DX1.A8564130-49CF-4F5B-B5AB-F4D1A10479FF-32-106292x84971-3321x2655.png	2655	302.537	630.9	1260.02	1422.19	1236.81	1397.47	1247.93	1409.37	2.26813	411.023	0.797165	18.5705	0.989335	0.518135	0.492865	28.7944	29.0341	5.8911	2.39826	2.13594	15.9699	15.1131	1.59376	88.9788	0.760769	0.4475	0.0555271	0.132871	0.0644754	0.0333962	0.0226943	0.0221805	0.0313653	0.027179	0.0160916	0.0168742	0.0125428	0.0120036	0.0129875	0.0148317	0.0154603	0.00967219	0.00990442	0.0100513	0.00811056	0.00792605	0.00863307	0.00876199
TCGA-A2-A0CU-01Z-00-DX1.5B77D21C-A497-478B-9752-3730322AD9ED-32-125444x90727-3920x2835.png	2835	309.331	655.548	1958.35	1237.58	1934.5	1212.85	1945.95	1224.7	2.28429	424.155	0.789832	18.8106	0.989866	0.519317	0.496583	28.9811	29.2907	5.99477	2.42606	2.15895	16.3166	15.4411	-3.17959	90.7166	0.762192	0.455954	0.0568922	0.133259	0.0645836	0.0333934	0.0230248	0.0219073	0.0309032	0.0270123	0.0160619	0.0169391	0.012587	0.0118529	0.0129322	0.014752	0.0152865	0.00971644	0.010031	0.0099487	0.00824908	0.00811318	0.00867603	0.00873392
TCGA-A2-A0CV-01Z-00-DX1.B02D017A-61CD-45FE-BB31-705CD127DDAB-32-159380x73062-4980x2283.png	2283	269.247	567.431	2566.2	1284.47	2543.67	1261.75	2554.43	1272.6	2.38402	371.438	0.785081	17.5138	0.993544	0.509485	0.480944	26.7773	26.8832	5.53404	2.26835	2.00035	15.441	14.7317	-3.28555	85.4742	0.74832	0.456753	0.0579248	0.128447	0.0647999	0.034017	0.0237157	0.0220136	0.0300479	0.0271701	0.0163649	0.0172996	0.0130922	0.0121236	0.0133093	0.0145702	0.0156586	0.00995929	0.01037	0.0102893	0.00850399	0.00852019	0.00903069	0.0089904
TCGA-A2-A0CW-01Z-00-DX1.8E313A22-B0E8-44CF-ADEA-8BF29BA23FFE-32-75849x67443-2370x2107.png	2107	315.443	620.396	1267.71	1217.8	1243.23	1194.8	1254.96	1205.77	2.08008	418.605	0.772641	19.053	0.991581	0.547001	0.525867	27.9057	28.2613	6.22826	2.51969	2.25625	16.6397	15.7976	2.40303	88.0484	0.78289	0.488375	0.0580946	0.14143	0.0661808	0.0324427	0.0241625	0.0206552	0.0308695	0.0274686	0.0154917	0.0170203	0.0133056	0.0115306	0.0122905	0.0146691	0.0154892	0.00932189	0.00984926	0.010033	0.00852991	0.00774175	0.0086359	0.00855583
TCGA-A2-A0CX-01Z-00-DX1.F07C75AB-E568-45CB-B497-37C712490393-32-71819x81606-2244x2550.png	2550	300.987	643.334	1186.22	1711.06	1162.49	1686.61	1173.89	1698.35	2.28778	412.177	0.800975	18.4722	0.991143	0.509772	0.490104	28.953	29.2694	5.84334	2.37746	2.11751	15.8504	14.9887	5.22414	89.0937	0.757245	0.44114	0.0562891	0.131072	0.0640342	0.03333	0.0228202	0.0230135	0.0312764	0.0269877	0.015788	0.0169341	0.0125152	0.0118889	0.0131928	0.0149136	0.0153839	0.00956662	0.0102373	0.00992337	0.00822444	0.00813717	0.00875918	0.00880761
TCGA-A2-A0CY-01Z-00-DX1.8815F011-317B-4BB7-A48F-64EABD0E558B-32-158002x81097-4937x2534.png	2534	304.861	652.361	2727.97	1109.79	2704	1085.01	2715.49	1096.91	2.37932	416.696	0.806111	18.5794	0.992798	0.505306	0.477504	29.6409	29.781	5.83779	2.37372	2.10189	15.8134	14.9812	-0.707263	90.6194	0.753785	0.431619	0.0540371	0.128717	0.0633996	0.0329883	0.0223767	0.0230844	0.0313044	0.0267331	0.0161922	0.0168369	0.0121441	0.0120811	0.0131712	0.0147462	0.0154726	0.00977128	0.0099865	0.00985302	0.00794209	0.00804471	0.00867066	0.00878277
TCGA-A2-A0CZ-01Z-00-DX1.A433A414-4F1B-4F99-8FD9-E64803F5E042-32-118740x83879-3710x2621.png	2621	321.86	676.112	1514.12	1298.32	1489.87	1273.13	1501.5	1285.2	2.28917	440.985	0.790553	19.1833	0.990128	0.518639	0.489972	29.5217	29.8137	6.09244	2.4574	2.19021	16.6733	15.729	1.01454	92.6707	0.760246	0.453824	0.056241	0.1345	0.0643454	0.0332904	0.0230114	0.0219606	0.031553	0.0269974	0.0161402	0.017017	0.0126362	0.0118326	0.0127509	0.0147825	0.0154072	0.00961885	0.0100031	0.0100191	0.00816521	0.00791324	0.00863196	0.00864463
TCGA-A2-A0D0-01Z-00-DX1.4FF6B8E5-703B-400F-920A-104F56E0F874-32-112037x88255-3501x2757.png	2757	324.15	680.643	1802.6	1432.29	1776.78	1408.39	1789.17	1419.84	2.34852	447.886	0.787497	19.225	0.988551	0.510715	0.477556	29.5004	29.8255	6.0667	2.44156	2.16566	16.9761	15.9617	2.17304	93.7552	0.748328	0.45058	0.0553263	0.133554	0.0634103	0.0331888	0.0234975	0.0217225	0.0314191	0.0268362	0.0159618	0.0172176	0.0128375	0.0117928	0.0129653	0.0149171	0.0153922	0.00961551	0.0101917	0.0100803	0.00834278	0.00790528	0.00868158	0.00871759
TCGA-A2-A0D3-01Z-00-DX1.D18CE1C0-291D-41C1-8F71-2A0551F8C661-32-103693x65863-3240x2058.png	2058	302.267	623.941	1532.37	1209.65	1508.15	1186.13	1519.8	1197.41	2.23441	408.949	0.796801	18.5751	0.993674	0.519748	0.497788	28.5866	28.8893	5.95679	2.41765	2.15548	15.9949	15.1362	-2.24342	88.3174	0.763105	0.450126	0.0565905	0.132757	0.0647919	0.0337972	0.0227951	0.0226205	0.0311468	0.0271211	0.0160332	0.0168645	0.0125097	0.0120917	0.0130259	0.014864	0.0157065	0.00947949	0.0100442	0.00995357	0.00799727	0.00799167	0.0087449	0.00873256
TCGA-A2-A0D4-01Z-00-DX1.35E43827-DABC-4685-A62A-333672923349-32-94801x85804-2962x2681.png	2681	323.457	663.303	1588.48	1447.09	1564.92	1421.58	1576.2	1433.85	2.25586	441.981	0.781617	19.2149	0.985426	0.520285	0.492107	28.8572	29.2129	6.14486	2.47383	2.19642	17.0311	16.0301	4.42519	92.1269	0.757457	0.463928	0.0569473	0.135818	0.0645539	0.0331112	0.0237408	0.0216481	0.0314579	0.0270301	0.0157883	0.017189	0.01307	0.0116235	0.0128435	0.014827	0.0154201	0.00952638	0.010138	0.010163	0.00858605	0.00802836	0.00858395	0.00871896
TCGA-A2-A0EM-01Z-00-DX1.305CF011-7451-4880-9A5D-AB4432CF53A5-32-108207x81900-3381x2559.png	2559	283.709	642.433	1923.9	1190.12	1900.28	1165.7	1911.62	1177.45	2.40057	402.985	0.815181	17.844	0.991199	0.483546	0.479613	29.389	29.3971	5.59837	2.29323	2.02081	15.3372	14.4845	-0.607508	87.3834	0.735472	0.412669	0.0552812	0.121489	0.0622786	0.0343553	0.0218471	0.0238183	0.0307652	0.0265969	0.0167602	0.0167784	0.0121599	0.0122264	0.0137712	0.014954	0.0155509	0.0101323	0.0101955	0.00973438	0.00783726	0.00845257	0.00889435	0.00895278
TCGA-A2-A0EN-01Z-00-DX1.F43A5D17-9267-4963-993A-93AC91BDC031-32-102815x88431-3212x2763.png	2763	327.911	685.594	1758.67	1432.9	1733.88	1407.77	1745.76	1419.82	2.2771	447.113	0.795774	19.3222	0.988226	0.514929	0.4892	29.8768	30.2118	6.13926	2.47306	2.20729	16.7183	15.7565	-1.10547	92.9792	0.759881	0.447557	0.0554537	0.13385	0.0641386	0.0332874	0.0227838	0.0221364	0.0316481	0.0268751	0.0157544	0.0169131	0.0124597	0.011805	0.0129655	0.0149256	0.0154954	0.00960576	0.0100562	0.00998773	0.00789607	0.00771465	0.00846509	0.008619
TCGA-A2-A0EO-01Z-00-DX1.D7A09E23-2CAB-4B3B-814C-BF0BA75B7589-32-106292x74771-3321x2336.png	2336	329.47	686.373	1508.54	1262.09	1483.46	1237.35	1495.53	1249.23	2.21043	445.378	0.798375	19.4046	0.98855	0.52465	0.50071	29.881	30.2271	6.1973	2.50159	2.23494	16.5857	15.6578	-2.8279	92.3807	0.771232	0.452741	0.0557515	0.136836	0.0651526	0.0335018	0.0222568	0.022406	0.0320082	0.0271688	0.0158048	0.0167109	0.0122826	0.0118018	0.0126896	0.015018	0.0153397	0.00943748	0.00987244	0.00984592	0.00803204	0.00770751	0.00853293	0.00855781
TCGA-A2-A0EP-01Z-00-DX1.1180C406-5C18-4373-8621-1B7B70875113-32-112336x74817-3510x2338.png	2338	262.339	574.834	1610.74	1380.19	1588.21	1357.1	1598.97	1368.19	2.37428	364.193	0.811659	17.2553	0.996185	0.494842	0.478058	27.6689	27.6838	5.37533	2.22589	1.97146	14.7735	13.9823	-1.85123	84.1645	0.743903	0.427007	0.0543131	0.125367	0.0646566	0.0339944	0.022334	0.0230413	0.0311193	0.0272984	0.0164561	0.0169409	0.0124019	0.011839	0.0134497	0.0145969	0.0159849	0.0098857	0.010401	0.0101492	0.00810257	0.00847928	0.00886939	0.00896676
TCGA-A2-A0EQ-01Z-00-DX1.5FCD8890-4594-4BE2-93B1-B8F698BFD2A0-32-121613x87178-3800x2724.png	2724	330.656	706.727	1928.17	1390.8	1902.73	1365.82	1914.94	1377.81	2.28447	451.792	0.802714	19.4191	0.988429	0.517137	0.493151	30.4723	30.7198	6.13879	2.47652	2.2103	16.5748	15.6196	-1.33968	93.8596	0.764519	0.44509	0.0552847	0.133018	0.0648065	0.0334328	0.0220532	0.0227576	0.0316715	0.0269566	0.0161159	0.0167515	0.0122634	0.0120093	0.0129758	0.014914	0.0154693	0.00957112	0.00997624	0.00977008	0.00781636	0.00777714	0.00855525	0.00871549
TCGA-A2-A0ER-01Z-00-DX1.18123C1B-A0CC-4957-9373-5FFAB985C2E8-32-70861x79312-2214x2478.png	2478	301.895	634.734	962.045	946.904	940.509	920.185	950.739	932.995	2.27819	410.011	0.80726	18.5589	0.990964	0.51975	0.494535	29.5766	29.6951	5.85687	2.39042	2.13561	15.5773	14.7969	0.459654	89.184	0.764255	0.438807	0.0553127	0.130152	0.0649032	0.0330206	0.0225686	0.022677	0.0312917	0.0270941	0.015983	0.0167856	0.0124334	0.0123771	0.0130988	0.0147254	0.0155288	0.00966956	0.00999745	0.00983833	0.00793984	0.00812479	0.00873476	0.00866441
TCGA-A2-A0ES-01Z-00-DX1.5652EE30-48C1-4EC1-AD77-8C72DFCB9A97-32-174742x72773-5460x2274.png	2274	275.998	584.361	2669.75	1220.33	2646.36	1197.72	2657.56	1208.53	2.35712	381.213	0.7893	17.7572	0.99367	0.509475	0.483017	27.2631	27.5095	5.6282	2.29711	2.03323	15.5779	14.7738	1.19803	86.5429	0.749704	0.451222	0.056723	0.1309	0.0644996	0.0337684	0.0235716	0.0223178	0.0304948	0.027004	0.0161946	0.0172097	0.0128779	0.0119585	0.0131374	0.0146632	0.0156422	0.0097816	0.0102817	0.0101822	0.00846841	0.00817318	0.00893342	0.00880913
TCGA-A2-A0ET-01Z-00-DX1.41E86BB9-EA52-4615-94E7-0F09DDB094F4-32-90970x88630-2842x2769.png	2769	298.198	626.893	1412.02	1486.5	1389.41	1461.67	1400.2	1473.61	2.51605	417.111	0.785483	18.3395	0.99195	0.506503	0.454276	27.9391	28.3052	5.71192	2.30652	2.02927	16.387	15.4676	-1.73309	92.3394	0.737355	0.447774	0.0559856	0.132091	0.0630817	0.0335759	0.0232407	0.0217369	0.0307667	0.026814	0.0160717	0.0173452	0.0130949	0.0117092	0.0131325	0.0148271	0.0154201	0.00970557	0.0104297	0.0104095	0.00856279	0.00813358	0.008919	0.00896066
TCGA-A2-A0EU-01Z-00-DX1.13335BEB-63D4-469B-A389-8A079A096129-32-84267x76940-2633x2404.png	2404	296.054	621.464	1322.37	986.929	1298.91	962.703	1310.13	974.342	2.26105	402.323	0.795558	18.4001	0.993585	0.514027	0.49342	28.6396	28.8624	5.88271	2.3911	2.12785	15.7825	14.9491	4.36832	87.8641	0.759354	0.447147	0.0560686	0.132073	0.0636692	0.03324	0.0229159	0.0217157	0.0306011	0.0268857	0.0159559	0.0169282	0.0125836	0.0118436	0.0130727	0.0148293	0.0156584	0.00961432	0.010024	0.00999988	0.00812097	0.00794522	0.00855122	0.00877875
TCGA-A2-A0EV-01Z-00-DX1.EA8C5594-BA4F-47A8-949B-D536E00E62C9-32-173323x78453-5416x2451.png	2451	300.123	630.492	2407.86	1203.04	2384.02	1179.07	2395.45	1190.55	2.32706	411.837	0.797331	18.5007	0.988524	0.515299	0.482625	28.6966	28.9177	5.82162	2.36358	2.10387	16.0113	15.1506	-2.86799	89.9875	0.756141	0.446816	0.0559988	0.13173	0.0647576	0.0336818	0.0228394	0.0223149	0.031508	0.0272337	0.0162174	0.0169738	0.0125703	0.011789	0.0131115	0.0149601	0.0157311	0.0097197	0.0101494	0.0101247	0.00820284	0.00810864	0.00879994	0.00883818
TCGA-A2-A0EW-01Z-00-DX1.F24495CB-63D8-483F-9834-F761E3F16BF0-32-90251x51995-2820x1624.png	1624	332.274	651.233	1036.79	779.232	1012.31	755.022	1024.02	766.636	2.0883	439.433	0.772653	19.5602	0.987838	0.545296	0.521417	28.4841	28.9088	6.38804	2.5738	2.30667	17.1378	16.2407	-1.63869	90.5083	0.783035	0.488482	0.0578245	0.143033	0.0660654	0.0325558	0.0239148	0.020419	0.031188	0.0271516	0.0154298	0.0169124	0.0133749	0.0114248	0.0121808	0.0144896	0.0153064	0.00936553	0.0099291	0.0101314	0.00852082	0.00749836	0.00854031	0.00835714
TCGA-A2-A0EX-01Z-00-DX1.F4C293E9-9BB2-48A1-8080-5F3082E219C5-32-80437x73392-2513x2293.png	2293	327.134	660.217	1239.85	1054.98	1215.61	1030.23	1227.24	1042.07	2.21518	439.831	0.779607	19.3625	0.989555	0.53052	0.499038	28.8469	29.227	6.23264	2.50766	2.23412	16.9837	16.0443	-1.76283	91.9208	0.768122	0.472817	0.0567611	0.138771	0.065104	0.0327951	0.0237072	0.0207789	0.0312512	0.0271232	0.0154728	0.0171465	0.0130457	0.01141	0.0126075	0.0147298	0.0153514	0.00955905	0.009889	0.0100805	0.00845293	0.00777958	0.00861707	0.00856136
TCGA-A2-A0EY-01Z-00-DX1.2F2428B3-0767-48E0-AC22-443C244CBD16-32-112995x91820-3531x2869.png	2869	277.577	592.206	1755.28	1601.81	1731.83	1578.93	1743.06	1589.86	2.51235	390.668	0.788524	17.7605	0.991995	0.502721	0.45645	27.5554	27.7753	5.50284	2.24096	1.97297	15.7779	14.9262	-0.558326	89.2775	0.734489	0.442866	0.0560724	0.128127	0.0629397	0.0339039	0.023436	0.0220113	0.030389	0.0270474	0.0163517	0.0171738	0.0129351	0.0119499	0.0132723	0.0148938	0.0156965	0.00996102	0.0103931	0.0102467	0.00850107	0.00835742	0.00893852	0.0090809
TCGA-A2-A0ST-01Z-00-DX1.AE05A5DB-4861-40DE-B0F5-7955FC903A96-32-151367x59872-4730x1871.png	1871	320.924	645.896	2467.55	639.132	2441.49	616.694	2454.01	627.434	2.17079	428.688	0.787666	19.1377	0.992961	0.53258	0.51048	28.8233	29.2248	6.18116	2.49896	2.22966	16.4794	15.6434	4.44272	89.9831	0.775011	0.46588	0.0561539	0.137942	0.0653856	0.0329661	0.0227718	0.0222692	0.0314505	0.0272844	0.015542	0.0166937	0.0126365	0.0118593	0.0126747	0.0148253	0.015455	0.00962588	0.00990831	0.0100234	0.00811348	0.0079764	0.00855387	0.00866652
TCGA-A2-A0SU-01Z-00-DX1.22420EE2-4FEB-42F3-9547-4739F0F73D50-32-122807x96830-3837x3025.png	3025	314.885	662.074	2144.19	1202.62	2120.3	1177.4	2131.76	1189.53	2.32778	431.557	0.797225	18.9394	0.988464	0.514359	0.481853	29.4884	29.753	5.98013	2.41843	2.15198	16.3659	15.4502	-1.20718	91.9994	0.75641	0.444905	0.0555776	0.132703	0.0638855	0.033185	0.022604	0.0222427	0.0314078	0.02662	0.0158824	0.0169693	0.0126198	0.0117686	0.0130406	0.0147783	0.0153833	0.00953275	0.0100189	0.0100155	0.00817025	0.00781867	0.00860302	0.00869704
TCGA-A2-A0SV-01Z-00-DX1.F5645E47-3540-4753-AF5D-F5709BD8DFC1-32-171359x56804-5354x1775.png	1775	289.709	612.102	2570.96	864.752	2548.33	840.395	2559.12	852.045	2.3372	400.851	0.788977	18.2031	0.994747	0.514844	0.48429	27.971	28.2068	5.77113	2.34497	2.08284	15.9729	15.1088	1.97197	88.4443	0.752526	0.452441	0.057086	0.132645	0.0640745	0.0336978	0.0233389	0.0219095	0.0310185	0.0272554	0.0161295	0.0171943	0.0128897	0.0116561	0.0129984	0.0147103	0.0156655	0.00976296	0.010205	0.0100881	0.00832268	0.00798175	0.00882161	0.00886323
TCGA-A2-A0SW-01Z-00-DX1.E1EA0407-B831-4D75-826E-80B82B821797-32-121855x85033-3807x2657.png	2657	221.816	503.169	1868.34	1212.97	1847.29	1190.45	1857.33	1201.17	2.80019	324.912	0.818083	15.9638	0.996308	0.474544	0.422534	27.0912	26.868	4.70398	1.97691	1.71098	13.7687	13.1241	1.59182	83.9811	0.703287	0.391834	0.05182	0.114805	0.0610955	0.0332558	0.0216002	0.0242147	0.0304647	0.0266494	0.0168793	0.0165986	0.0124134	0.0126937	0.0142774	0.015092	0.0158344	0.0104315	0.0105852	0.0101508	0.00812802	0.00899443	0.00943949	0.00953257
TCGA-A2-A0SX-01Z-00-DX1.219A994C-8974-4458-98FA-FB1F14868E04-32-182783x77308-5711x2415.png	2415	300.41	605.971	3229	1354.02	3205.15	1330.8	3216.59	1341.9	2.19774	402.474	0.789314	18.4749	0.991673	0.536068	0.513432	28.4001	28.5712	5.9368	2.42387	2.1593	15.7755	15.0367	1.30338	87.1162	0.772553	0.46228	0.0549492	0.133911	0.0655303	0.0317333	0.0229867	0.0221135	0.0312389	0.0273151	0.0155364	0.0166686	0.0127474	0.0121586	0.0129319	0.0147527	0.0155368	0.00949796	0.0100426	0.00996762	0.00823475	0.0082058	0.00880889	0.00881395
TCGA-A2-A0SY-01Z-00-DX1.279A5479-E183-4F79-AF40-50BF1834BA4A-32-134231x93580-4194x2924.png	2924	258.268	549.777	2029.27	1319.95	2007.53	1296.69	2017.91	1307.81	2.46792	360.235	0.797453	17.2261	0.99302	0.504891	0.464223	27.1045	27.2094	5.33892	2.19452	1.94149	14.9858	14.2323	1.21987	85.7105	0.740238	0.437871	0.0554719	0.127656	0.0638892	0.0336247	0.0229392	0.0225435	0.0309702	0.0273281	0.0164581	0.0169649	0.0128613	0.0120367	0.0134382	0.0148693	0.0158444	0.0100332	0.0103471	0.0102605	0.00843693	0.00848567	0.00899965	0.00912398
TCGA-A2-A0T0-01Z-00-DX1.51F904DA-A4B5-4451-8AEF-58E7EF7651DB-32-137087x99647-4283x3113.png	3113	242.475	516.581	2164.68	1849.51	2142.36	1828.13	2153	1838.32	2.51045	338.918	0.80501	16.6299	0.997151	0.503368	0.461258	26.6593	26.6408	5.09916	2.12425	1.86778	14.2366	13.6734	0.424236	83.3506	0.737381	0.424836	0.0548633	0.123228	0.0637916	0.0335217	0.0228523	0.0235937	0.031057	0.0272137	0.0167554	0.0169526	0.0127286	0.0124764	0.0137106	0.0147211	0.0158422	0.0102849	0.0105293	0.0101057	0.00842137	0.00856587	0.00930256	0.00927075
TCGA-A2-A0T1-01Z-00-DX1.CD1E9C46-18A3-466B-AA0B-24F3055FA851-32-87583x88560-2736x2767.png	2767	306.825	609.938	1355.67	1665.39	1331.88	1642.08	1343.26	1653.25	2.15571	409.45	0.778256	18.7647	0.992151	0.538599	0.512884	27.7291	28.0835	6.08065	2.46491	2.20156	16.3833	15.5598	2.63226	87.9296	0.775693	0.477507	0.0578877	0.139272	0.065901	0.033003	0.0239057	0.0211871	0.0306659	0.0273079	0.0156427	0.0170321	0.0132138	0.0115723	0.0125815	0.0145617	0.0155578	0.00947479	0.00997025	0.0100232	0.00849895	0.00777735	0.00864261	0.00864324
TCGA-A2-A0T2-01Z-00-DX1.29A5C4C8-6AE8-44EE-98C2-ACBCBFBE9D60-32-120903x93550-3778x2923.png	2923	195.218	482.521	2050.01	1535.44	2028.13	1515.59	2038.59	1525.01	2.90602	300.543	0.813274	15.0401	0.998169	0.465272	0.41442	25.9055	25.4596	4.35722	1.85763	1.59479	13.2588	12.7312	3.92103	80.8211	0.693539	0.398111	0.0522606	0.111077	0.0621813	0.0334197	0.0225875	0.0231612	0.029485	0.0272816	0.0172597	0.0171553	0.0129163	0.0130078	0.0142352	0.014944	0.0163018	0.0106068	0.0108889	0.0103693	0.00856969	0.00936827	0.00969884	0.00973666
TCGA-A2-A0T3-01Z-00-DX1.5E96BC87-F4FB-4ABA-8D81-FAB7F4A80661-32-144018x60462-4500x1889.png	1889	233.091	505.396	2297.59	1040.5	2276.62	1018.42	2286.62	1028.95	2.57919	332.09	0.790397	16.3574	0.995674	0.489962	0.445967	25.5853	25.6287	4.98057	2.06892	1.80766	14.6082	13.9015	5.89743	83.1256	0.722984	0.435489	0.0565026	0.122729	0.0632497	0.0339748	0.0240628	0.0226066	0.0303352	0.0272593	0.0167687	0.0177257	0.0134815	0.0123825	0.0140206	0.01491	0.0160559	0.0103131	0.0106893	0.0104073	0.0089869	0.00888889	0.00927026	0.00957842
TCGA-A2-A0T4-01Z-00-DX1.AC61ED08-2E42-4D4A-BB81-746D3FEBB653-32-97103x71054-3034x2220.png	2220	311.71	639.343	1793.06	1141.38	1768.84	1117.43	1780.46	1128.94	2.25119	421.525	0.783882	18.8638	0.990674	0.522563	0.493558	28.5247	28.782	6.04826	2.44469	2.16836	16.4921	15.5944	-1.87209	89.9733	0.762814	0.464095	0.0558837	0.135569	0.0648229	0.0328242	0.0235513	0.0212042	0.0313218	0.0270296	0.0155815	0.0168064	0.0128679	0.0114982	0.0127648	0.0145862	0.0155109	0.00949931	0.0101013	0.0101306	0.00828789	0.00786481	0.00860563	0.0087037
TCGA-A2-A0T5-01Z-00-DX1.128C288B-B357-439B-A8D4-8E7DEBF73E4E-32-121855x90275-3807x2821.png	2821	242.314	523.647	1955.87	1494.33	1933.95	1472.52	1944.39	1482.94	2.43703	340.979	0.801353	16.683	0.992977	0.500185	0.472636	26.3673	26.2717	5.16321	2.14081	1.89261	14.5378	13.8731	-0.391299	82.6021	0.73964	0.438378	0.0572236	0.123066	0.0656531	0.0346339	0.0234143	0.0224561	0.0306545	0.0276469	0.0167827	0.017334	0.0130281	0.0124082	0.0135555	0.0147094	0.0160184	0.0101041	0.0106218	0.0103343	0.0084112	0.008681	0.00919781	0.00915679
TCGA-A2-A0T6-01Z-00-DX1.207A3883-5B41-40EB-95A1-D64C9610650B-32-108527x85330-3391x2666.png	2666	309.768	639.392	1616.71	1090.83	1592.65	1066.84	1604.16	1078.33	2.36774	426.282	0.776959	18.7878	0.99105	0.519687	0.475621	28.2018	28.6034	5.95291	2.39553	2.12295	16.7241	15.8045	-0.62612	92.1563	0.752239	0.463186	0.0575241	0.134728	0.0634611	0.0335463	0.0239075	0.0211127	0.0306056	0.026743	0.0159353	0.0172705	0.0131148	0.011697	0.0130089	0.0146202	0.0155275	0.00962992	0.0102041	0.01025	0.00863712	0.00811679	0.00863791	0.00893861
TCGA-A2-A0T7-01Z-00-DX1.EA4DF9B5-8D04-4BCC-9ECB-CB8CB8ACBE1C-32-99959x81052-3123x2532.png	2532	306.094	617.03	1357.08	1181.38	1333.63	1157.48	1344.83	1168.93	2.23532	413.083	0.782788	18.6912	0.990777	0.530752	0.49854	28.0194	28.3751	5.99137	2.42694	2.16168	16.3432	15.4838	2.66505	89.0891	0.765839	0.467145	0.0565952	0.136848	0.0648826	0.0330823	0.0232818	0.0215767	0.0311857	0.0274971	0.0157396	0.0170644	0.013011	0.011528	0.0127189	0.014861	0.0156258	0.00947992	0.0100372	0.0101327	0.00841667	0.0078902	0.00862298	0.0087427
TCGA-A2-A0YC-01Z-00-DX1.F01F2268-17D8-45FD-8917-FD89454D0709-32-150739x78640-4710x2457.png	2457	311.256	625.059	1951.53	1056.27	1927.52	1032.61	1939.02	1043.92	2.16573	417.173	0.781956	18.8744	0.988436	0.53358	0.508853	28.1529	28.5092	6.08736	2.46801	2.20426	16.4622	15.5829	4.05541	88.7082	0.772068	0.472363	0.0567318	0.138605	0.0656198	0.0326069	0.0235418	0.0211888	0.0312574	0.0273225	0.0154691	0.0169272	0.0130191	0.011674	0.0126511	0.0149328	0.0155656	0.00942484	0.00995263	0.0100945	0.00843244	0.00776713	0.00859253	0.00859658
TCGA-A2-A0YD-01Z-00-DX1.B81FF541-F154-4C49-950B-B6CB723369E2-32-147858x85469-4620x2670.png	2670	325.693	647.778	1917.09	1430.21	1892.58	1406.35	1904.35	1417.8	2.18517	436.725	0.771132	19.2846	0.988796	0.537344	0.502144	28.2678	28.7131	6.22635	2.50367	2.23485	17.0343	16.1118	0.101686	91.2685	0.771221	0.481205	0.0571528	0.140738	0.0647252	0.0327566	0.0241671	0.0205991	0.0309781	0.0272292	0.0153215	0.017353	0.0132019	0.0114988	0.0124822	0.0147859	0.015595	0.0093752	0.00986952	0.0101992	0.00856505	0.00782491	0.00861482	0.00856331
TCGA-A2-A0YE-01Z-00-DX1.8A2E3094-5755-42BC-969D-7F0A2ECA0F39-32-131536x80453-4110x2514.png	2514	305.62	620.45	1897.91	1303.5	1874.71	1279.24	1885.8	1290.87	2.2604	413.167	0.780052	18.6945	0.991795	0.527724	0.496083	28.0092	28.2923	5.99224	2.42637	2.15698	16.4235	15.5753	-1.28736	89.3809	0.764756	0.469449	0.0567278	0.136294	0.0649488	0.0329801	0.0237623	0.0212082	0.0308263	0.0272634	0.0156163	0.0170429	0.0131566	0.0116651	0.0128657	0.0146785	0.0155226	0.00972037	0.00994884	0.0101559	0.00849795	0.00802398	0.00873545	0.0087258
TCGA-A2-A0YF-01Z-00-DX1.6166E995-0669-43D6-B9C7-FE39BCE529CF-32-151699x66761-4740x2086.png	2086	332.84	685.51	2368.34	1096.62	2342.19	1073	2354.76	1084.28	2.26394	449.682	0.787462	19.4906	0.987448	0.527057	0.491114	29.6077	29.9656	6.21517	2.49769	2.22668	16.918	15.9973	6.15208	93.7086	0.767296	0.461552	0.0559233	0.13672	0.0649729	0.032991	0.0232845	0.0215956	0.0312618	0.0268216	0.0156787	0.0170603	0.0127532	0.0117766	0.0127511	0.0148225	0.015374	0.00956615	0.00999734	0.0100538	0.00825212	0.00785569	0.00846158	0.00861175
TCGA-A2-A0YG-01Z-00-DX1.89A39319-F880-47DE-B311-DA1F6A64B6F3-32-100812x77998-3150x2437.png	2437	299.072	604.438	1859.3	1102.98	1835.75	1079.67	1847.01	1090.85	2.15926	401.797	0.780977	18.5375	0.991808	0.532076	0.511405	27.6414	27.9078	5.9837	2.43227	2.17512	16.1913	15.3784	0.962917	86.91	0.770871	0.474305	0.0570595	0.137395	0.065966	0.0327451	0.0237815	0.0211293	0.0309634	0.0276227	0.0156192	0.0171104	0.0130933	0.0117621	0.0126505	0.0146691	0.015582	0.00941883	0.00999545	0.0101422	0.00864676	0.00796773	0.00873466	0.00874017
TCGA-A2-A0YH-01Z-00-DX1.FBA5E711-8275-45B3-BC20-5A786EE23548-32-69128x55582-2160x1736.png	1736	266.766	568.124	1041.47	826.107	1018.78	803.414	1029.61	814.249	2.38709	371.359	0.787481	17.4878	0.993756	0.508727	0.476016	26.927	27.1219	5.49219	2.24717	1.99627	15.4194	14.6234	2.1177	85.8808	0.745977	0.451847	0.0569392	0.129771	0.0638826	0.0339742	0.0239681	0.0217681	0.0307496	0.0271609	0.0161816	0.0172235	0.0132358	0.0117965	0.0132926	0.01456	0.0156455	0.00975201	0.0101623	0.0103314	0.00873218	0.0085215	0.00897435	0.00898143
TCGA-A2-A0YI-01Z-00-DX1.1CF2EC2D-C722-467F-8832-409B823E8D8F-32-134417x62758-4200x1961.png	1961	345.11	677.22	2116.98	973.433	2092.46	948.404	2104.22	960.401	2.1512	459.396	0.764197	19.8741	0.98846	0.54203	0.509169	28.8099	29.2942	6.47156	2.58949	2.30718	17.6891	16.7317	-0.541169	93.195	0.776083	0.489331	0.0586289	0.142077	0.0647032	0.032488	0.0246687	0.0195969	0.0306494	0.0267879	0.015155	0.0174862	0.0135856	0.0116134	0.0122911	0.0145675	0.0152691	0.00937793	0.00983041	0.0101816	0.00873808	0.00763005	0.00841737	0.00845597
TCGA-A2-A0YJ-01Z-00-DX1.8135C74E-DAA8-4C8E-AF14-A4B5B57695BE-32-88331x70445-2760x2201.png	2201	332.634	647.6	1313.38	1176.83	1289.19	1152.68	1300.79	1164.27	2.11955	440.192	0.762213	19.5109	0.991201	0.545845	0.513816	27.8959	28.3707	6.38206	2.56168	2.29057	17.4084	16.4844	0.601567	90.9306	0.779538	0.497617	0.0582207	0.143466	0.0658684	0.0324449	0.0249748	0.0194571	0.0305077	0.0271549	0.0150782	0.0173755	0.0137515	0.0114071	0.0123535	0.0145513	0.0153441	0.00929115	0.00990961	0.0102399	0.00890948	0.00767643	0.00849568	0.00847443
TCGA-A2-A0YK-01Z-00-DX1.FB23FC30-B3B2-452A-A6B0-94129B333207-32-102733x80772-3210x2524.png	2524	283.791	579.026	1629.83	1297.25	1606.28	1274.86	1617.53	1285.56	2.30679	386.291	0.783667	18.0035	0.993559	0.521435	0.487497	27.2242	27.4819	5.73273	2.33371	2.07058	15.7736	14.9921	-1.94819	86.7831	0.757215	0.461378	0.0568027	0.133633	0.0646033	0.0331879	0.0234997	0.0211909	0.0306802	0.0274575	0.0158113	0.017084	0.0129918	0.0118424	0.0130151	0.014796	0.0157623	0.00968204	0.0100797	0.0101879	0.00853451	0.00803071	0.00884098	0.0089825
TCGA-A2-A0YL-01Z-00-DX1.69A438C7-B1E0-4990-B1E6-586C551DC79C-32-79690x75773-2490x2367.png	2367	328.795	653.282	1406.07	1096.24	1381.43	1072.31	1393.26	1083.78	2.10275	436.612	0.771854	19.421	0.990586	0.5404	0.519697	28.3988	28.7786	6.34541	2.55388	2.28108	17.0411	16.1464	0.252574	90.149	0.779773	0.487874	0.0578816	0.141218	0.066152	0.0326341	0.0242865	0.0205144	0.0311879	0.0269234	0.0152522	0.0172841	0.0132718	0.0114349	0.0124736	0.0144925	0.0153644	0.00931089	0.00994329	0.0101092	0.00864995	0.0076978	0.00856061	0.00841673
TCGA-A2-A0YM-01Z-00-DX1.A48B4C96-2CC5-464C-98B7-F0F92AE56533-32-85450x84350-2670x2635.png	2635	314.549	637.892	1291.36	1727.43	1267.79	1702.71	1279.07	1714.62	2.23966	423.387	0.795701	18.9157	0.992488	0.525802	0.494601	28.9893	29.2645	6.03654	2.44987	2.18427	16.275	15.436	-0.328649	89.9735	0.765501	0.450852	0.0557034	0.134007	0.0650677	0.0335207	0.0226941	0.0225108	0.0316728	0.0273843	0.0158516	0.0167411	0.0124863	0.0117733	0.0130736	0.0147103	0.0155334	0.00951767	0.0098476	0.00992357	0.00824877	0.00796014	0.00861058	0.00862867
TCGA-A2-A0YT-01Z-00-DX1.63CA3E36-B3E4-4D3F-9F80-2703970DBE5B-32-111374x83027-3480x2594.png	2594	225.535	486.458	1515.43	1289.65	1494.24	1268.73	1504.32	1278.72	2.46036	319.322	0.788822	16.0953	0.997582	0.499446	0.467644	25.0669	25.099	4.99634	2.0781	1.82829	14.2189	13.6146	2.47004	80.0906	0.733766	0.443959	0.0579377	0.123726	0.0643226	0.0340307	0.0243717	0.0224535	0.0300641	0.0278948	0.0168631	0.0174484	0.0133898	0.0122755	0.0136369	0.0146986	0.0163514	0.010274	0.0106322	0.0103568	0.00875467	0.00900093	0.00936924	0.00941664
TCGA-A2-A1FV-01Z-00-DX1.F70ACD9A-7819-4296-BD28-4D24BBA8AFF4-32-118047x92889-3688x2902.png	2902	308.975	652.294	1594.96	1598.32	1570.44	1574.19	1582.18	1585.76	2.3683	425.047	0.798633	18.722	0.990233	0.510361	0.475087	29.1677	29.4725	5.88353	2.38025	2.11054	16.2027	15.2948	-3.4376	91.7694	0.75262	0.441467	0.0549078	0.131643	0.0639094	0.0332529	0.022686	0.0227233	0.0315438	0.0268931	0.0160532	0.0169561	0.0124634	0.0118803	0.0131378	0.0148237	0.0155417	0.00972847	0.0100885	0.0100721	0.00807919	0.0080145	0.00873394	0.00884972
TCGA-A2-A1FW-01Z-00-DX1.DC2BC5D7-E57B-444E-833F-9A1B6E11DE6D-32-128316x47859-4009x1495.png	1495	236.197	524.445	2301.36	714.66	2279.42	692.764	2289.9	703.239	2.57967	341.531	0.803953	16.4743	0.995744	0.486409	0.448464	26.3673	26.4307	5.01226	2.07987	1.82403	14.5763	13.8182	-0.539789	83.9199	0.720331	0.421157	0.0558164	0.121564	0.0632612	0.0349357	0.0231294	0.0233437	0.0304917	0.0274145	0.0170734	0.0173298	0.0128003	0.0123535	0.0135928	0.0148912	0.0160671	0.010384	0.0106297	0.0103103	0.00845825	0.00857579	0.00926629	0.0093706
TCGA-A2-A1FX-01Z-00-DX1.35B93F3A-9959-4D72-A702-08B27563D24F-32-73734x72663-2304x2270.png	2270	247.357	556.583	1398.06	1245.37	1375.16	1223.19	1386.12	1233.8	2.78216	358.092	0.808093	16.7594	0.996123	0.473439	0.419547	27.1848	27.3085	4.99793	2.06009	1.78864	14.7777	14.024	-6.56762	88.3617	0.711312	0.406121	0.054178	0.120125	0.0611144	0.033752	0.0222342	0.0233202	0.0305567	0.0268891	0.0168293	0.0172715	0.0123972	0.011948	0.0139382	0.0148212	0.0156991	0.0102265	0.010896	0.0102096	0.00810557	0.00846166	0.00911085	0.00922569
TCGA-A2-A1FZ-01Z-00-DX1.0BAAEF41-DCA4-4677-9A27-09E990033FA6-32-114910x72168-3590x2255.png	2255	314.739	645.277	1801.29	1232.94	1777.45	1208.39	1788.84	1220.18	2.26944	427.772	0.785961	18.9476	0.990364	0.521186	0.488349	28.5886	28.9603	6.04844	2.44271	2.16608	16.6572	15.7157	-0.275848	90.8983	0.757683	0.460186	0.0565551	0.135566	0.0644313	0.0335972	0.0233397	0.0215243	0.030808	0.0269163	0.0159569	0.0172152	0.0129905	0.0117538	0.0128589	0.0147331	0.0153595	0.00964852	0.00998123	0.0101627	0.00842663	0.00777265	0.00860721	0.00866911
TCGA-A2-A1G0-01Z-00-DX1.9ECB0B8A-EF4E-45A9-82AC-EF36375DEF65-32-87140x84575-2723x2642.png	2642	286.739	574.31	1344.63	1210.03	1321.22	1187.71	1332.41	1198.37	2.15718	383.864	0.777332	18.1706	0.99224	0.535713	0.513377	26.8834	27.1861	5.89307	2.40115	2.14635	15.9053	15.1073	2.23978	85.0214	0.772473	0.478664	0.0570758	0.138376	0.0659453	0.0327754	0.0242296	0.0211585	0.0307506	0.0273497	0.015652	0.0171083	0.0131163	0.0116125	0.0127011	0.0145512	0.0156906	0.00947581	0.0100552	0.0100588	0.00863582	0.00803842	0.00874705	0.00874624
TCGA-A2-A1G1-01Z-00-DX1.E52A474F-DE13-41CF-94D4-D00BAC46ECF4-32-77564x57339-2423x1791.png	1791	269.679	593.482	1364.01	757.106	1341.14	733.517	1352.07	744.818	2.57463	381.162	0.800814	17.5524	0.990177	0.490367	0.446469	27.7467	27.9908	5.39131	2.20116	1.93282	15.3786	14.5498	-6.18552	89.3708	0.732091	0.427965	0.054841	0.126719	0.0625814	0.0337167	0.0227772	0.0228507	0.0307229	0.0265299	0.0163678	0.0169733	0.0127207	0.01228	0.0134828	0.0148799	0.015679	0.00996288	0.0102907	0.0101374	0.00839148	0.00826691	0.00893911	0.0091611
TCGA-A2-A1G4-01Z-00-DX1.0274DF5B-5920-419A-B778-2F04D9C602F2-32-107249x87769-3351x2742.png	2742	327.554	685.179	1525.16	1580.27	1499.8	1555.88	1511.92	1567.59	2.31274	450.464	0.787709	19.2996	0.990765	0.515691	0.484699	29.4446	29.8454	6.16627	2.47446	2.19868	16.983	16.0066	3.73563	93.5741	0.755499	0.454422	0.0571736	0.133794	0.0637242	0.0336593	0.0231411	0.0220502	0.0308455	0.0264527	0.0161229	0.0172193	0.0125619	0.0118633	0.0129128	0.0145687	0.0150547	0.00960493	0.0100697	0.00998899	0.00817436	0.00799927	0.00856634	0.00863249
TCGA-A2-A1G6-01Z-00-DX1.BCC3EC46-CEBF-4B37-BCF0-266D18170B54-32-122571x76971-3830x2405.png	2405	280.606	598.35	2061.12	1149.95	2037.8	1126.8	2048.97	1137.84	2.4102	391.519	0.790184	17.8886	0.992279	0.507894	0.473578	27.7335	27.8856	5.61631	2.28763	2.02548	15.7464	14.9337	-2.41428	88.0601	0.744888	0.447348	0.0557435	0.129982	0.0640456	0.0335785	0.0233601	0.0221073	0.0307215	0.0271523	0.0163522	0.0172667	0.0129545	0.0119368	0.01306	0.014605	0.0157128	0.00979063	0.0104076	0.0103326	0.00847535	0.00814987	0.00887042	0.0088596
TCGA-A2-A3KC-01Z-00-DX1.2532878B-49E2-48D5-82D5-00730C90EEF8-32-106624x79915-3332x2497.png	2497	248.833	549.246	1496.55	1338.77	1474.54	1316.09	1485.06	1326.92	2.58106	356.779	0.800777	16.8361	0.994508	0.486197	0.447161	26.8892	26.8757	5.14488	2.12485	1.8664	14.9034	14.1188	3.98334	85.4532	0.720202	0.425678	0.0559786	0.121731	0.0627188	0.0346578	0.0231052	0.0223644	0.0299753	0.0271915	0.0169394	0.017397	0.0128068	0.0123022	0.0135993	0.0147553	0.0158139	0.0101029	0.0105072	0.0103535	0.00845018	0.0086245	0.00913366	0.00918897
TCGA-A2-A3KD-01Z-00-DX1.E400D529-A0D1-4C78-AD5C-33EB0508B128-32-75208x84093-2350x2627.png	2627	250.738	553.803	1118.83	1033.89	1096.55	1011.88	1107.15	1022.41	2.28411	350.68	0.806364	16.7291	0.995625	0.50509	0.513129	27.0114	26.9815	5.30029	2.20594	1.9458	14.2569	13.598	8.58415	80.3581	0.752001	0.437117	0.0549705	0.121199	0.0654153	0.0331023	0.0223812	0.0226479	0.0303243	0.0276231	0.0164682	0.0167052	0.0121169	0.0128387	0.0134958	0.0150208	0.0156768	0.0100273	0.0102586	0.00999795	0.00806335	0.00902235	0.00934098	0.00919293
TCGA-A2-A3XS-01Z-00-DX1.867925C0-91D8-40A0-9FEA-25A635AC31E7-32-54264x70636-1695x2207.png	2207	239.049	510.475	908.733	1015.44	888.785	992.364	898.3	1003.44	2.40478	333.909	0.800575	16.4548	0.995793	0.503758	0.474121	26.0132	25.967	5.11503	2.12885	1.88085	14.2467	13.6283	-2.13426	80.831	0.741892	0.4375	0.0562948	0.122652	0.0654226	0.0341486	0.0235925	0.0228284	0.0305841	0.0280317	0.0167281	0.0172364	0.0132867	0.0124389	0.0137334	0.0148644	0.0163168	0.0100919	0.010618	0.0102622	0.00841294	0.00887279	0.00945655	0.00944497
TCGA-A2-A3XT-01Z-00-DX1.336D6C78-576A-481B-8C83-F3A0FC4B182C-32-114240x85395-3570x2668.png	2668	319.54	634.725	2226.46	1057.46	2201.8	1034.01	2213.64	1045.23	2.10758	423.404	0.781617	19.1413	0.992019	0.538249	0.521228	28.3981	28.8058	6.25554	2.53057	2.25996	16.576	15.7486	1.05087	88.6136	0.779459	0.474764	0.0576598	0.139541	0.0655144	0.0329426	0.023396	0.0215284	0.0310371	0.0270813	0.0156413	0.0168694	0.0129844	0.0117062	0.0126374	0.0144861	0.0154203	0.00942907	0.00985129	0.00993539	0.00827964	0.0078514	0.00873609	0.00846991
TCGA-A2-A3XU-01Z-00-DX1.174A92D4-50B2-4A59-AD31-D5EC5BBF2F65-32-96152x71782-3004x2243.png	2243	301.775	614.283	1507.57	1092.43	1484.95	1067.92	1495.75	1079.69	2.29819	408.308	0.778131	18.5573	0.991093	0.523908	0.487934	27.6585	28.0467	5.92974	2.40144	2.13187	16.3186	15.5023	0.314496	89.3867	0.761769	0.468015	0.0571584	0.136847	0.0644521	0.0329466	0.0235382	0.0211895	0.0307515	0.0270889	0.015754	0.0172411	0.0130329	0.0116441	0.012742	0.0147419	0.0156936	0.00955892	0.0101531	0.0101183	0.00852439	0.00801781	0.00866659	0.00870527
TCGA-A2-A3XV-01Z-00-DX1.4B58B7CD-B3F6-4C31-863F-924D291EF17C-32-70448x76478-2201x2389.png	2389	267.443	563.862	1038.19	1219	1015.22	1196.56	1026.2	1207.31	2.5245	374.355	0.78639	17.5011	0.994495	0.503242	0.453575	26.8605	27.0844	5.41875	2.21553	1.95154	15.5684	14.757	0.953096	87.9468	0.735168	0.445564	0.0566494	0.12934	0.0630839	0.0340628	0.0240298	0.0217898	0.0303656	0.0270615	0.0165337	0.017416	0.0132818	0.0119745	0.0132084	0.0145956	0.0157875	0.0099482	0.0104165	0.0103422	0.00877276	0.00830598	0.00903086	0.00905169
TCGA-A2-A3XW-01Z-00-DX1.45F5F36F-5503-4A38-AF37-E526915A8DBE-32-86632x86118-2707x2691.png	2691	286.49	590.592	1756.58	1201.32	1734.23	1177.36	1744.94	1188.82	2.32461	392.624	0.784053	18.0884	0.992452	0.52164	0.488798	27.4649	27.722	5.73395	2.3357	2.07643	15.8755	15.0852	3.94405	87.6932	0.75643	0.461516	0.0563377	0.133017	0.0648115	0.0330178	0.0236766	0.0216431	0.0307723	0.0270695	0.015882	0.0171807	0.0131244	0.011951	0.0129865	0.0146045	0.0156981	0.00977416	0.0102217	0.0102148	0.00851583	0.00816285	0.00875891	0.00883354
TCGA-A2-A3XX-01Z-00-DX1.03C6D70F-2833-4E97-91B7-DE70CD083D92-32-115192x89693-3599x2802.png	2802	321.89	656.821	2020.81	1318.42	1997.1	1293.44	2008.44	1305.42	2.23966	433.668	0.782208	19.1263	0.991932	0.524101	0.492434	28.7135	29.0553	6.13114	2.47244	2.19846	16.7354	15.8229	1.65803	91.2675	0.765265	0.465619	0.0562112	0.136822	0.0641987	0.0329496	0.0234982	0.0208788	0.0309772	0.0268598	0.0154806	0.0170252	0.0130118	0.0116835	0.0127252	0.0148802	0.0154718	0.00946392	0.00980573	0.0101321	0.00841256	0.00773202	0.00846915	0.0087031
TCGA-A2-A3XY-01Z-00-DX1.E57FC9BF-411E-4028-AC10-8BCA5D0C8472-32-98056x65182-3064x2036.png	2036	338.483	667.178	1571.99	1116.99	1547.49	1092.18	1559.25	1104.1	2.15003	448.658	0.772538	19.7107	0.991817	0.538857	0.50928	28.8096	29.2848	6.42438	2.57749	2.29691	17.3305	16.3954	-0.676438	92.2207	0.777371	0.482299	0.0573381	0.141982	0.0652241	0.0326543	0.0240771	0.0204563	0.031008	0.0268072	0.0153121	0.0170609	0.0133036	0.0114646	0.0122838	0.01463	0.0153457	0.00918514	0.00987303	0.0100693	0.00854567	0.00759662	0.0084897	0.00839545
TCGA-A2-A3XZ-01Z-00-DX1.B7A1344E-7015-4A21-B3D4-EB760161BE7C-32-107576x86527-3361x2703.png	2703	317.986	645.834	1608.08	1374.86	1584.29	1350.4	1595.67	1362.13	2.29233	431.896	0.783467	18.9773	0.98783	0.523666	0.4856	28.4926	28.8027	6.04311	2.43759	2.16899	16.7619	15.8071	-0.652844	91.5965	0.75933	0.464224	0.0569997	0.135	0.06493	0.0337894	0.0240562	0.0211643	0.0310188	0.0270154	0.0158497	0.0174015	0.0130611	0.0117441	0.0126641	0.0148417	0.0154979	0.00958808	0.0100079	0.0101601	0.00840619	0.00789076	0.00872417	0.00878612
TCGA-A2-A3Y0-01Z-00-DX1.A1EDDF82-FFAA-44A4-A749-7FB6F8133CC0-32-107576x71331-3361x2229.png	2229	270.048	585.407	1910.3	1343.44	1887.25	1320.49	1898.29	1331.44	2.67841	386.565	0.786154	17.5051	0.992352	0.490753	0.432556	27.1018	27.373	5.36242	2.17694	1.90264	15.8456	14.9843	-1.96235	90.525	0.718542	0.436781	0.0559972	0.12642	0.0621001	0.0338079	0.0235012	0.0219109	0.030283	0.0264421	0.0165463	0.0175793	0.0131669	0.0122742	0.0133555	0.0145737	0.0155664	0.0100552	0.0106026	0.0103771	0.00871052	0.00839982	0.00911079	0.00917955
TCGA-A2-A04T-01Z-00-DX1.71444266-BD56-4183-9603-C7AC20C9DA1E-32-107533x80761-3360x2523.png	2523	321.974	681.109	2036.55	1295.15	2010.29	1271.86	2022.94	1283.03	2.32311	441.851	0.796786	19.0913	0.993208	0.511338	0.482047	29.6456	29.9157	6.02508	2.43307	2.16162	16.5733	15.6152	-2.58386	92.6955	0.754611	0.445461	0.0548578	0.132761	0.0641974	0.0333963	0.0227681	0.022372	0.0315322	0.027014	0.0160228	0.0170422	0.0124849	0.0120119	0.0129558	0.015043	0.0155181	0.00973782	0.0100658	0.0100271	0.00807227	0.00788928	0.00865334	0.00883531
TCGA-A2-A04U-01Z-00-DX1.06D17357-46A8-4DC3-A22B-2F4EB6EE3F79-32-130424x86726-4075x2710.png	2710	313.586	664.131	2227.28	1182.79	2202.9	1158.01	2214.59	1169.88	2.29802	424.633	0.798597	18.9145	0.992404	0.513482	0.488982	29.6596	29.8907	5.98841	2.42858	2.16486	16.1098	15.2456	-4.65848	91.1997	0.763958	0.44592	0.0542167	0.132465	0.0643157	0.0322351	0.0226277	0.0224628	0.031466	0.0268052	0.0157929	0.0167505	0.0124367	0.0119112	0.0129226	0.0148727	0.0153536	0.00955714	0.00997217	0.00974863	0.00811044	0.00786195	0.00855936	0.00864538
TCGA-A2-A04X-01Z-00-DX1.E01A4522-67B3-4FEF-BD6B-99DFED9E7C85-32-122895x81484-3840x2546.png	2546	320.313	667.103	1730.87	1675.69	1706.19	1651.23	1718.05	1662.98	2.25289	432.985	0.796872	19.0865	0.992219	0.5196	0.495234	29.4809	29.6936	6.07663	2.46163	2.19708	16.4351	15.5109	1.53879	91.1644	0.764683	0.451791	0.0557084	0.133358	0.0649219	0.0334393	0.0230233	0.0220499	0.0314914	0.0269099	0.0160378	0.0170377	0.0126778	0.0119867	0.0128882	0.0145924	0.0154853	0.00939595	0.00986528	0.00994973	0.00818288	0.00814931	0.00874742	0.00864603
TCGA-A2-A04Y-01Z-00-DX1.4DC97AD6-4806-4A3A-A998-FD36F93590A4-32-93131x66392-2910x2074.png	2074	272.643	546.568	1213.93	1552.41	1191.87	1530.01	1202.38	1540.72	2.09391	364.999	0.790135	17.6718	0.992445	0.545142	0.533427	26.7318	26.7784	5.70674	2.35445	2.11391	15.1107	14.4289	2.82838	81.8716	0.781403	0.47586	0.0571909	0.134242	0.0689137	0.032393	0.0237534	0.0216589	0.0313592	0.0281266	0.0157143	0.0168194	0.0130406	0.0118673	0.0129116	0.0147247	0.015949	0.00962442	0.0100229	0.00985627	0.00853649	0.00831483	0.00891608	0.00880262
TCGA-A2-A259-01Z-00-DX1.7289CD72-CB74-41D4-B4AC-4EA5FDFEC666-32-170408x86460-5325x2701.png	2701	224.278	477.587	2769.41	1461.3	2748.01	1440.74	2758.22	1450.55	2.35126	311.45	0.799324	16.1158	0.996025	0.506005	0.48399	25.319	25.2519	5.04318	2.10998	1.86617	13.9272	13.3327	-4.62716	78.1483	0.745483	0.442146	0.0565619	0.124934	0.0657409	0.0340045	0.0234293	0.0229474	0.0305577	0.0283196	0.016575	0.017261	0.0128899	0.0122035	0.0136516	0.0148315	0.0163848	0.0100748	0.0105604	0.0102206	0.00853292	0.00869758	0.00930459	0.00934877
TCGA-A2-A25A-01Z-00-DX1.6D311E39-9F96-4775-B9DA-8D034D1AD1DC-32-87584x77882-2737x2433.png	2433	274.737	581.57	1312.49	1244.88	1289.5	1221.93	1300.51	1232.91	2.57881	385.809	0.783218	17.6695	0.993297	0.500964	0.451059	27.0952	27.3375	5.47725	2.23012	1.95895	15.8189	14.9943	0.570455	89.3321	0.730278	0.446152	0.0559214	0.12869	0.0628633	0.0333855	0.0234758	0.0214577	0.0302129	0.0267791	0.016211	0.0172491	0.0131881	0.0120751	0.013151	0.0145543	0.0155449	0.00989104	0.0105118	0.0104033	0.00873257	0.00842462	0.00899022	0.00909873
TCGA-A2-A25B-01Z-00-DX1.58D7BEDE-5558-4A9E-A95E-DDF24C9267EF-32-102816x90000-3213x2812.png	2812	304.859	612.361	1524.99	1383.18	1499.87	1360.93	1511.91	1371.56	2.25324	411.429	0.782352	18.6989	0.988522	0.531634	0.494053	28.0537	28.3925	5.96575	2.4175	2.15908	16.3431	15.4915	-0.175975	89.4265	0.765149	0.467491	0.0564763	0.136809	0.0649	0.0329443	0.0237427	0.0216216	0.030981	0.0272056	0.0155674	0.0171143	0.0131945	0.0115844	0.0128279	0.0147158	0.0157038	0.00953647	0.0100109	0.0102481	0.00856197	0.00800101	0.0086863	0.00872346
TCGA-A2-A25C-01Z-00-DX1.F8E6044A-435E-42D5-94FF-C0F572F1ED99-32-102815x75326-3212x2353.png	2353	277.187	558.824	1410.76	1192.11	1388.63	1169.03	1399.19	1180.03	2.24149	373.989	0.784565	17.8282	0.993368	0.526122	0.499422	26.7298	26.9759	5.71202	2.3368	2.08078	15.6002	14.8495	0.180331	84.6729	0.763048	0.465423	0.0577782	0.134284	0.0653596	0.0337659	0.0238385	0.021897	0.0305626	0.0275742	0.0160254	0.0170224	0.0131501	0.0119168	0.0130061	0.0147183	0.015754	0.00965481	0.0101727	0.0101336	0.0085014	0.00814178	0.00883641	0.00882862
TCGA-A2-A25E-01Z-00-DX1.46D1950B-0BAF-4A44-B58F-CD738E74CB27-32-89488x68661-2796x2145.png	2145	234.426	540.131	1389	1066.57	1366.76	1044.32	1377.39	1054.92	2.99691	348.853	0.805496	16.3399	0.996759	0.464152	0.397747	26.9079	26.8885	4.74479	1.96882	1.69643	14.6581	13.9209	0.250441	89.0399	0.691704	0.400478	0.052747	0.11565	0.060766	0.0338328	0.0223941	0.0229804	0.0297719	0.0266142	0.0172543	0.0173127	0.0127369	0.0125196	0.0139175	0.0147568	0.015711	0.0105733	0.010973	0.0103422	0.00834947	0.0087593	0.00950185	0.00946154
TCGA-A2-A25F-01Z-00-DX1.87499CD4-E41C-46B1-AAF3-5CE881F2B8BC-32-156128x94572-4879x2955.png	2955	254.574	556.077	2596.39	1344.71	2574.16	1321.74	2584.76	1332.74	2.50912	360.003	0.807008	17.0446	0.995545	0.49451	0.456833	27.4159	27.5039	5.23949	2.16061	1.90999	14.7477	13.994	1.05919	85.6978	0.732577	0.421913	0.0546977	0.123788	0.0631662	0.0339332	0.0224243	0.0230763	0.0308563	0.0270191	0.0164358	0.0171077	0.0126158	0.0121249	0.0135912	0.0148539	0.015776	0.00984729	0.0104274	0.0101277	0.00815041	0.00846913	0.00907718	0.00919426
TCGA-A2-A4RW-01Z-00-DX1.4AF8656E-2478-4895-8C59-B0C969F3E474-32-111384x90505-3480x2828.png	2828	327.489	677.515	1635.93	1460.79	1610.78	1436.49	1622.84	1448.13	2.29286	446.035	0.788	19.2831	0.986664	0.519118	0.487587	29.3415	29.67	6.15048	2.4733	2.19693	16.8633	15.9377	-0.176122	92.9479	0.758792	0.456697	0.0568015	0.134589	0.0642979	0.0335667	0.0230026	0.0216888	0.031154	0.0268998	0.0158614	0.0171027	0.0128225	0.0116274	0.0129029	0.0148286	0.0154237	0.00962132	0.0100627	0.0101098	0.00837967	0.00791639	0.00859183	0.00871049
TCGA-A2-A4RX-01Z-00-DX1.E2C96C9D-5023-4F41-8CC8-24C6E015B252-32-95200x63022-2975x1969.png	1969	353.626	726.964	1194.36	1084.03	1168.63	1058.46	1180.99	1070.76	2.26053	476.448	0.785721	20.0865	0.987597	0.522687	0.488541	30.313	30.7647	6.41726	2.56767	2.28111	17.5141	16.5005	0.483967	96.3828	0.766284	0.461908	0.0563642	0.137593	0.06402	0.0335944	0.0232526	0.0210353	0.0314957	0.0265928	0.0157067	0.0169472	0.0127888	0.0116904	0.0124951	0.0148083	0.0151352	0.00943713	0.00986462	0.0100458	0.00815189	0.00756396	0.00837906	0.00854532
TCGA-A2-A4RY-01Z-00-DX1.143E32FC-E10F-4590-9C72-32094B24EF8C-32-86632x80946-2707x2529.png	2529	249.097	530.879	1242.99	1007.03	1220.93	985.05	1231.47	995.54	2.44199	347.266	0.803398	16.8169	0.9928	0.49995	0.466284	26.5914	26.6522	5.2178	2.15769	1.89771	14.6041	13.8731	3.71959	83.1796	0.738473	0.431073	0.0551768	0.125509	0.0641103	0.0336309	0.0229174	0.0230453	0.0306908	0.0276646	0.0166292	0.0170702	0.0128508	0.0121393	0.0137301	0.0147544	0.0160691	0.0100676	0.0104785	0.0102703	0.00848187	0.00855243	0.00907511	0.00923565
TCGA-A2-A4S0-01Z-00-DX1.5878187D-325F-4274-BE41-86BB2BA5F841-32-106624x77452-3332x2420.png	2420	266.955	556.792	1553.59	1460.19	1530.99	1437.89	1541.79	1448.56	2.17902	358.796	0.792731	17.5066	0.994744	0.531989	0.536018	27.2993	27.144	5.68441	2.34611	2.09022	14.7449	14.2039	1.13558	81.8346	0.779203	0.468564	0.058293	0.126251	0.0672988	0.0329284	0.0225057	0.0228874	0.0296423	0.0276445	0.0163403	0.0164533	0.0120489	0.0123882	0.0131625	0.0142144	0.0155209	0.0098586	0.0102088	0.00983537	0.00802807	0.00856248	0.00899241	0.00882629
TCGA-A2-A4S1-01Z-00-DX1.C69B14F6-5021-4FD8-8F2D-70227A5DA2B1-32-92344x49931-2885x1560.png	1560	330.142	662.25	1428.13	734.386	1404.08	709.516	1415.57	721.431	2.20372	443.393	0.777789	19.386	0.990919	0.531246	0.498394	28.6757	29.0858	6.24132	2.51181	2.24251	17.0641	16.1421	-0.380952	91.9487	0.768756	0.473753	0.05683	0.138954	0.0648748	0.0331185	0.0235295	0.020686	0.030861	0.0272581	0.0154339	0.0171769	0.0129274	0.0119408	0.0126058	0.0146799	0.0154031	0.00945425	0.00983526	0.0100988	0.00841929	0.00778938	0.00851304	0.00855616
TCGA-A2-A4S2-01Z-00-DX1.D779B63B-8817-43F1-A8F4-236C82DB78F8-32-99008x77456-3094x2420.png	2420	280.369	591.257	1393.52	1098.3	1370.35	1075.16	1381.44	1086.24	2.46293	391.292	0.788472	17.8255	0.993937	0.5052	0.462032	27.502	27.772	5.56954	2.26562	1.99727	15.7435	14.9339	-2.34964	88.7577	0.73852	0.443933	0.0560799	0.129505	0.0628652	0.033843	0.023456	0.0224344	0.0306494	0.0271017	0.0163863	0.0171782	0.0131645	0.0120843	0.0132299	0.0147535	0.0159374	0.0100228	0.0102576	0.0103061	0.00836512	0.0082567	0.00887713	0.00897498
TCGA-A2-A4S3-01Z-00-DX1.50699E65-E536-4C9B-93A7-4C9894624A29-32-95200x75137-2975x2348.png	2348	292.967	604.281	1377.3	1176.88	1354.08	1153.28	1365.19	1164.56	2.3732	402.794	0.784715	18.282	0.991534	0.518417	0.475012	27.7305	28.0138	5.74154	2.33165	2.07023	16.1073	15.2457	-1.17076	89.7202	0.75221	0.457488	0.0561047	0.133516	0.0644629	0.033148	0.0237261	0.0219353	0.0309983	0.0272494	0.0159204	0.0171232	0.0132679	0.011991	0.0131277	0.0148153	0.0157865	0.00968614	0.0101728	0.0103389	0.00851377	0.00816402	0.00881395	0.00884491
TCGA-A7-A0CD-01Z-00-DX1.F045B9C8-049C-41BF-8432-EF89F236D34D-32-96152x37492-3004x1171.png	1171	286.981	586.578	1411.35	672.465	1389.9	647.62	1400.11	659.514	2.20987	389.742	0.795275	18.0748	0.994103	0.522861	0.502739	27.6847	27.8998	5.78041	2.36539	2.10628	15.6107	14.803	-2.33038	85.5404	0.760548	0.455033	0.0576187	0.132588	0.0651933	0.03404	0.0234667	0.0218315	0.0310761	0.0273894	0.0164481	0.0168886	0.0130092	0.0116835	0.0126895	0.0146328	0.0155894	0.00973287	0.0102623	0.00989513	0.00827106	0.00819923	0.00893025	0.0089046
TCGA-A7-A0CE-01Z-00-DX1.E67322FB-ED25-4B85-B3B0-2B8BD277BB4A-32-191352x58998-5979x1843.png	1843	296.96	623.911	2898.73	849.226	2875.21	825.267	2886.52	836.747	2.50072	412.476	0.786326	18.3275	0.989315	0.50548	0.455953	28.0256	28.2747	5.71531	2.31048	2.03302	16.3175	15.4081	3.27051	91.9019	0.739942	0.449333	0.0568641	0.130474	0.0632682	0.0338235	0.0230827	0.0216675	0.0305642	0.0267801	0.0162714	0.0170794	0.0129693	0.0119327	0.0130807	0.0148249	0.0153865	0.00990436	0.0102685	0.0101472	0.00863329	0.00824294	0.00885841	0.00880763
TCGA-A7-A0CG-01Z-00-DX1.D77019C2-96B1-4EF5-A61E-5F2D5B8D9852-32-142800x34647-4462x1082.png	1082	242.873	529.165	2349.97	516.708	2328.59	494.135	2338.8	504.921	2.64473	349.416	0.789543	16.6689	0.995819	0.48808	0.435585	26.0568	26.148	5.05659	2.08707	1.82046	14.9865	14.2395	-3.08222	85.8205	0.716992	0.431948	0.0556966	0.123443	0.0625651	0.0344645	0.0238976	0.022608	0.0301361	0.0268213	0.0170078	0.0178183	0.0135163	0.0121936	0.0136602	0.014572	0.0160593	0.0100937	0.0109217	0.0106005	0.00880297	0.00889787	0.00917879	0.00922888
TCGA-A7-A0CH-01Z-00-DX1.48ADDD0B-527A-404C-B794-7D7D35BF861F-32-37128x94571-1160x2955.png	2955	270.428	537.445	520.89	1482.78	499.958	1459.38	509.937	1470.59	2.18684	361.424	0.784346	17.6102	0.992863	0.533954	0.511475	26.2387	26.449	5.69348	2.33656	2.07826	15.2626	14.5977	-4.25213	82.6726	0.770739	0.472861	0.0575818	0.135794	0.0670046	0.033103	0.0235901	0.021352	0.0309627	0.0275399	0.0159355	0.0170037	0.0131389	0.0117921	0.0128973	0.0144533	0.0160463	0.00970294	0.0100305	0.0101638	0.0084811	0.00813973	0.0089851	0.0090007
TCGA-A7-A0CJ-01Z-00-DX1.E26F2F62-D688-4373-BB7B-790A06734E49-32-31416x77161-981x2411.png	2411	325.603	677.178	517.886	1241.58	492.615	1216.95	504.795	1228.74	2.38244	445.854	0.796955	19.3002	0.992038	0.511394	0.469622	29.8255	30.2091	6.0701	2.44088	2.15478	16.8008	15.845	-0.421835	94.7172	0.752317	0.441394	0.0557391	0.132374	0.0634136	0.0342709	0.0225715	0.0236748	0.0306392	0.0272446	0.0158579	0.0171602	0.0122847	0.0122665	0.0132866	0.0149097	0.0155577	0.00946612	0.0102621	0.0100874	0.00821376	0.00784384	0.00879435	0.00883998
TCGA-A7-A0D9-01Z-00-DX1.FBC3B90F-C58B-4476-8354-0AF9248324E3-32-108528x34826-3391x1088.png	1088	313.024	612.213	1792	550.617	1768.98	526.516	1780.03	538.083	2.10449	414.662	0.771615	18.9462	0.990306	0.546073	0.520692	27.6448	28.0201	6.19081	2.50405	2.23064	16.6	15.7919	-3.44107	87.8422	0.781037	0.487099	0.0577978	0.140449	0.0657628	0.033049	0.0244905	0.0214681	0.0302346	0.0276113	0.0149917	0.0170482	0.0132065	0.0115578	0.0122544	0.0147056	0.0156763	0.00946993	0.0100365	0.0101317	0.00838269	0.00783212	0.00859718	0.00847222
TCGA-A7-A0DA-01Z-00-DX1.5F087009-16E9-4A07-BA24-62340E108B17-32-85680x47955-2677x1498.png	1498	315.395	633.617	1396.93	683.375	1372.71	659.795	1384.34	671.082	2.2546	427.171	0.772582	18.9588	0.987797	0.530052	0.492781	27.8816	28.2799	6.08913	2.45252	2.18039	16.8907	15.9592	-1.49867	90.8997	0.762743	0.477959	0.0579658	0.138355	0.0649838	0.0331275	0.0244868	0.0203922	0.0310156	0.0267834	0.0155796	0.0173892	0.0134861	0.0114524	0.0126716	0.0146303	0.0153777	0.00956608	0.0100665	0.0101898	0.00874701	0.00784116	0.00873741	0.00861489
TCGA-A7-A0DB-01Z-00-DX1.9CE855BC-0C37-43FB-8806-6625E176BE2E-32-172312x37616-5384x1175.png	1175	316.625	634.364	2689.12	597.185	2663.1	575.111	2675.6	585.64	2.11435	419.293	0.792165	19.0665	0.989871	0.539312	0.517011	28.6915	29.0373	6.15225	2.49723	2.23786	16.2719	15.4572	-3.76716	88.797	0.782805	0.467579	0.055563	0.13963	0.0668073	0.0328611	0.0228496	0.0221395	0.0320286	0.0274866	0.0155901	0.0167529	0.0126092	0.0117689	0.0126315	0.0148085	0.0156887	0.00924839	0.0098492	0.00975476	0.00824037	0.00781768	0.00863951	0.00846881
TCGA-A7-A0DC-01Z-00-DX1.C770781E-83E4-47DD-B658-25BBBBB32066-32-83776x31012-2618x969.png	969	257.203	539.669	1259.58	437.248	1237.72	414.858	1248.22	425.586	2.2873	352	0.791896	17.1921	0.996974	0.51964	0.506423	26.7833	26.6367	5.43309	2.24864	2.01601	14.842	14.2024	0.316849	82.6732	0.765629	0.457551	0.0575948	0.127819	0.0665681	0.0337824	0.0236018	0.0213037	0.0306817	0.028181	0.016561	0.0167948	0.0129352	0.0121878	0.0135322	0.0151751	0.0163522	0.0100927	0.0102065	0.00998793	0.00859203	0.00903129	0.00916457	0.00907455
TCGA-A7-A13D-01Z-00-DX1.D206783C-FA6A-4B6A-B3AA-4132A2C9626B-32-104720x42081-3272x1315.png	1315	232.51	501.711	1679.31	594.294	1658.08	572.358	1668.23	582.794	2.56453	331.808	0.798633	16.3838	0.996324	0.492137	0.447713	25.922	25.8706	4.99177	2.07519	1.81606	14.5258	13.7871	-4.61826	83.0388	0.724236	0.432769	0.0556527	0.122644	0.0641477	0.0340022	0.022982	0.023025	0.0299844	0.0277948	0.0164515	0.0167369	0.0134019	0.0121834	0.0138904	0.0148256	0.0161337	0.0101434	0.0105686	0.0104145	0.00878721	0.00882678	0.009148	0.00932406
TCGA-A7-A13E-01Z-00-DX1.891954FF-316A-4562-AA14-429631944F22-32-142800x30325-4462x947.png	947	301.09	577.234	2196.29	531.925	2173.07	509.442	2184.16	520.222	2.00428	393.163	0.765536	18.5393	0.990575	0.553826	0.545467	26.6948	27.0088	6.15998	2.51145	2.24641	16.2038	15.46	-1.23995	83.7141	0.78894	0.500143	0.0593236	0.141477	0.0663486	0.0319945	0.0254068	0.0204752	0.0301876	0.0272387	0.0151879	0.01717	0.0136176	0.0117082	0.0124638	0.0139947	0.0153874	0.00924845	0.00977437	0.00998241	0.00876352	0.00818413	0.00853582	0.0085305
TCGA-A7-A13F-01Z-00-DX1.AB4ADDD3-8E1C-4AB9-813E-D137A2CFB950-32-88536x49122-2766x1535.png	1535	174.981	387.854	1477.99	737.97	1458.48	718.965	1467.73	727.945	2.64791	254.762	0.80355	14.3864	1	0.479584	0.433759	23.4561	23.221	4.26857	1.83753	1.5852	12.6725	12.2499	0.650764	73.682	0.708638	0.413136	0.0553223	0.114041	0.0631454	0.0345731	0.0240548	0.0234823	0.029502	0.0279713	0.017192	0.0173854	0.0134679	0.0129961	0.0143606	0.0150167	0.0171817	0.0106476	0.01095	0.0106312	0.008682	0.00951969	0.00965611	0.0100071
TCGA-A7-A13G-01Z-00-DX1.C258C545-8C1F-41D4-846F-962A746CBDFB-32-21896x76792-684x2399.png	2399	334.423	655.412	362.228	1272.69	337.467	1248.98	349.326	1260.39	2.09084	440.896	0.767278	19.5041	0.989051	0.543302	0.527987	28.1178	28.5437	6.45044	2.58976	2.31506	17.2184	16.3301	-6.08522	90.2232	0.785228	0.493701	0.0587159	0.141762	0.0656419	0.0321597	0.0242558	0.020597	0.029533	0.0275936	0.0159915	0.0169504	0.0131518	0.0119975	0.0121554	0.0141607	0.0154052	0.00938205	0.00966083	0.00976436	0.00865224	0.00806872	0.00852884	0.00858769
TCGA-A7-A13H-01Z-00-DX1.FCB33A3C-6209-474C-83C1-02551F242937-32-137088x30980-4284x968.png	968	310.67	634.003	2229.75	438.433	2205.21	415.129	2217.03	426.212	2.21027	418.148	0.784046	18.8568	0.988175	0.529075	0.502311	28.2456	28.6522	6.05702	2.44977	2.19187	16.4337	15.5941	7.55654	89.5702	0.770056	0.467786	0.0568534	0.137381	0.0647429	0.0334868	0.0234219	0.0216853	0.0311685	0.0273336	0.0159637	0.0169209	0.0130205	0.0115795	0.0127866	0.0146668	0.0154878	0.00958657	0.00993486	0.0101489	0.00846086	0.00778554	0.00872668	0.00852037
TCGA-A7-A26E-01Z-00-DX1.BA4A7E28-0563-4C23-82D0-AB34A2E79AE3-32-92343x91192-2885x2849.png	2849	325.409	646.136	1475.7	1418.11	1451.86	1393.65	1463.31	1405.33	2.13315	433.621	0.769674	19.3012	0.988459	0.540859	0.512341	28.2129	28.6651	6.29882	2.53128	2.2566	17.009	16.1404	-3.32936	90.2144	0.777263	0.485041	0.0586379	0.141179	0.0650209	0.0327867	0.0242892	0.0205584	0.0306921	0.0271219	0.0154522	0.0172134	0.0132223	0.0113087	0.0123959	0.0146905	0.0154674	0.00921708	0.00992542	0.00987382	0.00863049	0.00769647	0.00866834	0.00846589
TCGA-A7-A26F-01Z-00-DX1.7ADE881D-325D-48ED-BA2D-30F589CA8EF2-32-93295x41721-2915x1303.png	1303	312.204	634.534	1402.03	625.789	1377.67	602.174	1389.38	613.492	2.36125	426.567	0.775108	18.8762	0.993793	0.521039	0.477167	27.9258	28.309	6.01673	2.41668	2.13687	16.9301	15.9733	0.618717	92.1468	0.75388	0.470798	0.0573025	0.13707	0.0641838	0.0333779	0.0243489	0.0204904	0.0305487	0.0264925	0.0154272	0.0173087	0.0133462	0.0114061	0.0127837	0.0143703	0.0155176	0.00963505	0.010095	0.0103991	0.00872734	0.00763599	0.00858301	0.00873619
TCGA-A7-A26G-01Z-00-DX1.29A27673-A16D-4044-BCCF-14BF6236D7D3-32-159935x45475-4997x1421.png	1421	345.542	701.725	2517.15	587.479	2492.96	561.62	2504.57	573.975	2.20754	467.442	0.774519	19.7801	0.991623	0.529617	0.499107	29.3341	29.7733	6.37396	2.55552	2.2733	17.4712	16.4872	3.22336	94.0679	0.767943	0.474096	0.0573077	0.139623	0.063967	0.032582	0.0241107	0.0212051	0.0310894	0.0267076	0.0155425	0.017224	0.0131315	0.0116598	0.0125383	0.0147213	0.0154143	0.00937309	0.00995527	0.0100641	0.0085415	0.00772098	0.00847865	0.00856886
TCGA-A7-A26H-01Z-00-DX1.3344CFD3-5A19-4B01-BEB2-AB89F83FD53A-32-88535x47771-2766x1492.png	1492	344.986	687.513	1389.74	706.8	1365.16	681.528	1376.96	693.632	2.18154	459.593	0.779635	19.811	0.98921	0.539969	0.505005	29.4368	29.9636	6.41348	2.57021	2.29634	17.2478	16.3693	0.631204	93.7179	0.777058	0.47297	0.0570076	0.139953	0.0647188	0.033074	0.0231801	0.0210114	0.0314883	0.0265497	0.0156238	0.0166814	0.0130156	0.0118234	0.0125191	0.0147452	0.0152457	0.00941937	0.00995504	0.010043	0.00832939	0.00770745	0.00857172	0.00851251
TCGA-A7-A26I-01Z-00-DX1.0077D012-BC14-4E96-84F7-A1A6A3A778DF-32-115191x42754-3599x1336.png	1336	371.511	715.955	1781.73	642.299	1756.08	616.867	1768.31	629.068	2.13886	490.152	0.758967	20.6772	0.985207	0.550445	0.504621	29.603	30.2167	6.74576	2.68102	2.39345	18.4253	17.3934	3.57565	96.7743	0.779971	0.49114	0.0561399	0.146279	0.0647911	0.0314309	0.0244671	0.0200381	0.0314424	0.0266717	0.0150602	0.0176692	0.0132826	0.0110525	0.0124992	0.0147657	0.0152134	0.00903716	0.00978462	0.0102543	0.00844674	0.00733404	0.00826056	0.00858226
TCGA-A7-A26J-01Z-00-DX1.86A92FBD-F346-4206-A1BE-0CBA1596135F-32-122807x34744-3837x1085.png	1085	328.91	637.198	1871.16	528.173	1847.29	504.084	1858.74	515.596	2.07015	435.656	0.763658	19.4146	0.990798	0.55373	0.525706	27.9945	28.3984	6.34927	2.56062	2.289	17.15	16.2729	3.43044	89.7549	0.785555	0.497104	0.0595025	0.142507	0.0657866	0.0333864	0.024495	0.019933	0.0305233	0.0272209	0.0154005	0.0173241	0.0135117	0.0116444	0.0123597	0.0144791	0.0152752	0.00928136	0.00991552	0.0102357	0.00888548	0.00788502	0.0086066	0.00853849
TCGA-A7-A2KD-01Z-00-DX1.BFF2DFC8-1D95-4DC2-98FC-5BD7D7C6CDF5-32-166600x49413-5206x1544.png	1544	231.708	502.717	2663.85	754.492	2642.42	732.842	2652.64	743.194	2.5678	330.04	0.803548	16.3122	0.995543	0.490573	0.447203	25.9357	25.922	4.96212	2.06339	1.81557	14.3347	13.6645	1.91231	82.8287	0.726256	0.424636	0.0558353	0.121842	0.0636996	0.0343763	0.0231086	0.0233395	0.0305453	0.0274232	0.0169119	0.0172606	0.0132092	0.0123703	0.0136208	0.014989	0.0161871	0.0103168	0.010685	0.0102763	0.0086097	0.00873839	0.00912527	0.00931337
TCGA-A7-A3IY-01Z-00-DX1.B4E75265-3B2A-456C-996A-F95B5A645BF8-32-40936x74551-1279x2329.png	2329	270.148	594.947	580.71	1172.06	556.556	1149.6	568.223	1160.33	2.40652	379.586	0.819264	17.5378	0.995008	0.493894	0.471755	28.7022	28.5537	5.41199	2.23077	1.97722	14.9006	14.1163	-1.43566	86.715	0.743432	0.415333	0.0575986	0.119957	0.0642478	0.0356966	0.0229621	0.0243676	0.0325206	0.0275384	0.0169344	0.01667	0.0117646	0.0124668	0.0139406	0.0150034	0.0155804	0.0100079	0.0102262	0.00991843	0.00810225	0.00851982	0.00876631	0.00871347
TCGA-A7-A3IZ-01Z-00-DX1.7437130B-DF49-40C8-ABCD-FF9364B9B1B0-32-37128x32746-1160x1023.png	1023	290.045	619.034	542.701	480.772	518.815	457.368	530.306	468.555	2.46436	401.862	0.789155	18.1735	0.992915	0.504062	0.461847	27.9436	28.3307	5.68888	2.30057	2.0367	15.9684	15.1255	-5.35851	90.6216	0.744324	0.442862	0.0561405	0.131072	0.0625545	0.0337268	0.0229184	0.0228363	0.0308662	0.0268377	0.0159566	0.0170508	0.0128459	0.0122934	0.0133115	0.0152266	0.015765	0.00985677	0.0101281	0.0102403	0.00860728	0.0082092	0.00885167	0.00896353
TCGA-A7-A3J0-01Z-00-DX1.59DB32BC-F59C-43B3-8DDD-4A728EBA8AB8-32-130424x24335-4075x760.png	760	275.293	564.209	1970.75	445.426	1949.05	421.862	1959.47	433.127	2.30575	372.446	0.795928	17.7005	0.993802	0.520312	0.492333	27.0003	27.2502	5.68497	2.3198	2.04164	15.2486	14.655	-3.99312	85.1467	0.762141	0.452576	0.0606498	0.1284	0.0650754	0.0349501	0.0232325	0.0237744	0.0302268	0.0266836	0.0164261	0.0170514	0.0129081	0.0118302	0.0130034	0.0134581	0.0157363	0.0101176	0.0102847	0.0102231	0.00816878	0.00805658	0.00911332	0.00901004
TCGA-A7-A3J1-01Z-00-DX1.92895B92-5F95-4EA3-9237-4CAF63CDE3FF-32-136136x39222-4254x1225.png	1225	314.522	674.053	2064.12	616.692	2038.96	592.733	2051.03	604.23	2.30605	432.424	0.790345	18.9243	0.988914	0.508072	0.485721	29.0896	29.3196	5.98416	2.41743	2.15463	16.6107	15.6364	13.882	91.6566	0.754145	0.453719	0.0558683	0.133178	0.0648922	0.033111	0.0231124	0.02158	0.0315436	0.0269057	0.0163072	0.0171667	0.012991	0.0121406	0.0131002	0.0148773	0.015342	0.00968271	0.0100653	0.0101621	0.00839334	0.00808546	0.00868785	0.00867538
TCGA-A7-A3RF-01Z-00-DX1.E60647BC-229D-4409-A564-EE0945F912EE-32-182784x54503-5712x1703.png	1703	239.869	512.691	2908.36	797.602	2886.32	776.353	2896.83	786.484	2.2743	330.099	0.801304	16.6458	0.996612	0.513439	0.508101	26.2301	26.1373	5.29645	2.19992	1.95427	14.188	13.6196	10.3325	79.587	0.761	0.448087	0.0584918	0.124222	0.0667163	0.0335693	0.0229077	0.0227913	0.0299819	0.0279355	0.0164463	0.0170271	0.0126232	0.0122273	0.0131443	0.0143544	0.0159143	0.00966458	0.0103631	0.0101865	0.00834814	0.00884637	0.00924975	0.00917158
TCGA-A7-A425-01Z-00-DX1.812A94B1-0403-4298-A6C5-F71AFD3A9995-32-160888x63794-5027x1993.png	1993	222.608	519.219	1985.34	862.694	1963.11	841.06	1973.79	851.427	2.64316	323.598	0.836485	15.974	0.997665	0.466036	0.431427	27.478	27.1878	4.73224	1.99211	1.73752	13.4224	12.7347	-1.58034	82.3452	0.7127	0.383385	0.0518257	0.113495	0.0628962	0.0338028	0.0208884	0.0255468	0.0310837	0.0274549	0.0173448	0.016808	0.0121925	0.0129948	0.0142403	0.0153004	0.0163391	0.0104596	0.0108227	0.00999312	0.00772595	0.00898718	0.00938382	0.00967208
TCGA-A7-A426-01Z-00-DX1.3058E873-9442-4872-80DA-E8A5B35054D2-32-130424x38904-4075x1215.png	1215	266.411	577.475	1981.92	558.697	1960.49	534.118	1970.7	545.936	2.61628	377.615	0.796127	17.4648	0.996094	0.491695	0.437893	27.3946	27.6621	5.34616	2.17859	1.91067	15.4605	14.6636	2.21521	89.3284	0.72584	0.427727	0.0555495	0.125728	0.0624972	0.0344517	0.0230238	0.0231493	0.0308515	0.0269537	0.0165232	0.0173141	0.0128766	0.0121307	0.0135237	0.0146964	0.015842	0.0100317	0.0103518	0.0104619	0.00846365	0.00863366	0.00895619	0.00921432
TCGA-A7-A4SA-01Z-00-DX1.B48FFD3E-9B45-4CEA-ACEE-5B08058CCF5F-32-102815x33551-3212x1048.png	1048	226.232	496.682	1689.24	463.495	1668.27	441.772	1678.31	452.159	2.65023	326.009	0.782565	16.167	0.99654	0.484459	0.43537	25.1821	25.3309	4.95289	2.04051	1.76921	14.6265	13.9497	2.36596	83.1398	0.71538	0.433169	0.0574219	0.122061	0.0619062	0.0351131	0.0240744	0.0217874	0.0300037	0.0271624	0.0169659	0.0184063	0.013275	0.0121626	0.0133811	0.0144595	0.0161523	0.0102434	0.0113003	0.0107754	0.00903634	0.00901523	0.00907078	0.00905415
TCGA-A7-A4SB-01Z-00-DX1.E8925605-5189-441E-A719-92CFC1118B0B-32-90439x80048-2826x2501.png	2501	327.165	644.54	1294.8	1225.36	1270.16	1201.96	1281.93	1213.14	2.12192	435.478	0.770966	19.2716	0.991003	0.547075	0.516509	28.2059	28.6626	6.26102	2.52139	2.26298	16.9101	16.056	-1.17095	90.2869	0.781353	0.486822	0.0590111	0.140011	0.0647007	0.0329696	0.0244485	0.0210939	0.0304342	0.0275838	0.0150361	0.0173053	0.0131469	0.0118759	0.0124509	0.0146751	0.0159849	0.00934381	0.0100083	0.0100432	0.0085488	0.00817339	0.00856556	0.0085435
TCGA-A7-A4SC-01Z-00-DX1.171E89D2-2D64-4C3F-A42C-B1167654858B-32-105671x63865-3302x1995.png	1995	186.948	408.452	1672.91	858.376	1653.36	838.637	1662.67	847.952	2.61133	270.044	0.795456	14.8174	0.994186	0.486723	0.43933	23.7564	23.6239	4.46543	1.90144	1.64486	13.1008	12.6317	-0.787879	75.34	0.712832	0.420562	0.0555731	0.117691	0.062758	0.0337638	0.0233186	0.022768	0.0296199	0.0286693	0.016919	0.0179445	0.0129587	0.0128588	0.013716	0.0151698	0.0167526	0.010351	0.0113648	0.0105064	0.00895896	0.0090546	0.00992402	0.00984434
TCGA-A7-A4SD-01Z-00-DX1.677152B3-17B2-42DB-AEEC-C9509ACCE831-32-134232x41193-4194x1287.png	1287	369.235	717.998	2033.57	629.34	2008.5	603.43	2020.52	615.873	2.14882	488.886	0.76152	20.5745	0.986161	0.545181	0.504498	29.4029	29.9519	6.71861	2.6674	2.37182	18.3983	17.3463	-1.87846	96.7068	0.779728	0.495921	0.0586986	0.144444	0.0650785	0.0328181	0.0245905	0.0196984	0.0308543	0.0267971	0.0150952	0.0171688	0.0135523	0.0112199	0.0122102	0.0143704	0.0150175	0.00911675	0.00964541	0.0103052	0.00872484	0.00734008	0.00834345	0.00814897
TCGA-A7-A4SE-01Z-00-DX1.16BC8401-E40E-4A1A-9BD9-12735C9AE3F6-32-116144x40272-3629x1258.png	1258	288.095	610.974	1768.27	623.991	1744.73	600.59	1756.01	611.755	2.61403	408.621	0.779722	18.0624	0.991857	0.500821	0.441418	27.5142	27.9006	5.56972	2.24892	1.97321	16.3664	15.4718	-3.24585	92.6799	0.727712	0.446293	0.0576091	0.128773	0.0620788	0.0346172	0.0240336	0.0225487	0.0298972	0.0268278	0.0165158	0.0177416	0.0133794	0.0116326	0.0133204	0.0146207	0.0156213	0.0100233	0.0104743	0.0106325	0.00873809	0.0082516	0.0088883	0.00910129
TCGA-A7-A4SF-01Z-00-DX1.CDCFD4BC-4363-4CF2-95F5-4922E04C3B9D-32-28560x40756-892x1273.png	1273	298.671	588.14	374.482	649.276	350.595	626.779	362.055	637.515	2.14402	397.025	0.774248	18.5603	0.990555	0.536668	0.509555	27.1505	27.4641	6.06062	2.44946	2.19298	16.3617	15.5265	2.75613	86.4904	0.772695	0.482628	0.0586384	0.138931	0.066011	0.0328248	0.024192	0.0200297	0.0308865	0.0272954	0.0154262	0.0173966	0.0134335	0.0116273	0.0125062	0.0147001	0.0153123	0.00950123	0.0101049	0.0104467	0.00854827	0.00786406	0.00878786	0.00859405
TCGA-A7-A56D-01Z-00-DX1.87D9CCF4-04EE-46D2-B7FC-A83561D7752C-32-181832x43520-5682x1360.png	1360	336.594	680.021	2883.05	669.482	2858.28	644.445	2870.18	656.492	2.13863	445.618	0.786783	19.7205	0.989935	0.533291	0.508316	29.3268	29.8993	6.39677	2.56832	2.29544	17.0101	16.1203	2.03301	92.317	0.78156	0.46813	0.0569199	0.141823	0.0654522	0.0330946	0.0229818	0.0215431	0.0320354	0.0271038	0.015359	0.0171067	0.01264	0.0113947	0.0124897	0.0148931	0.0153002	0.00923773	0.00956393	0.00996086	0.00827517	0.00754205	0.00834786	0.00832511
TCGA-A7-A5ZV-01Z-00-DX1.21F2EA4A-4F31-43D6-A036-E20E326AF37E-32-145656x49405-4551x1543.png	1543	348.115	692.483	2237.25	722.528	2212.61	697.335	2224.46	709.38	2.25694	468.934	0.764943	19.8989	0.988539	0.535553	0.489702	28.8879	29.3246	6.37941	2.54586	2.26664	17.8435	16.8196	-2.92735	95.8242	0.768051	0.486944	0.0569777	0.141155	0.0652148	0.0323159	0.0246095	0.0197202	0.0308266	0.0269936	0.015137	0.0177796	0.0134745	0.0116581	0.0123967	0.0145878	0.0152796	0.00927184	0.00999382	0.0103314	0.00877292	0.00787931	0.0085601	0.00849934
TCGA-A7-A5ZW-01Z-00-DX1.5F571EE3-A1A3-4604-BE89-1A46E0EC508B-32-119952x24046-3748x751.png	751	370.741	766.034	1784.67	377.115	1759.81	349.349	1771.69	362.598	2.23783	497.032	0.792786	20.5618	0.983051	0.523715	0.492414	31.1823	31.7343	6.60477	2.62421	2.33086	17.7374	16.7559	-7.7043	98.5369	0.773403	0.456163	0.056881	0.138019	0.0642514	0.0339503	0.0222921	0.0218568	0.0315461	0.0268735	0.0157237	0.0171476	0.0123439	0.0118627	0.0126353	0.0145548	0.0152845	0.00951645	0.00990118	0.00987416	0.00797201	0.00758303	0.00839568	0.00826514
TCGA-A7-A5ZX-01Z-00-DX1.A4C651F0-DB8E-4534-84A2-AD875F62209F-32-94248x63197-2945x1974.png	1974	347.023	693.989	1515.63	997.233	1490.9	972.086	1502.85	984.049	2.16354	463.893	0.778791	19.888	0.988074	0.539779	0.50557	29.3011	29.6757	6.40801	2.57026	2.29906	17.4601	16.4717	11.3922	94.0213	0.77787	0.480179	0.0575803	0.140983	0.0661835	0.0333694	0.0237833	0.0200787	0.0315282	0.026969	0.0154636	0.0172201	0.0130946	0.0112253	0.0124085	0.0147223	0.0153425	0.00930555	0.00993298	0.0101862	0.00820137	0.00785318	0.00851519	0.00853136
TCGA-A7-A6VV-01Z-00-DX1.07AE0E16-A883-4C86-BC74-4E13081175F2-32-59976x47221-1874x1475.png	1475	267.857	559.572	976.794	721.248	953.149	699.566	964.478	709.898	2.44348	372.275	0.787222	17.534	0.997027	0.505985	0.462768	26.7431	27.0081	5.51654	2.24659	1.96973	15.5816	14.7707	-1.56206	86.6937	0.739059	0.448234	0.0565036	0.130232	0.0637663	0.034636	0.02346	0.0216704	0.0303647	0.0265948	0.0167748	0.0171143	0.0130203	0.0121332	0.0130064	0.0142195	0.0157126	0.00990503	0.010538	0.0104293	0.00868205	0.00839325	0.00891895	0.00905179
TCGA-A7-A6VW-01Z-00-DX1.1BC4790C-DB45-4A3D-9C97-92C92C03FF60-32-137088x31461-4284x983.png	983	343.965	697.82	2218.54	458.639	2194.68	432.118	2206.13	444.867	2.21044	460.689	0.780878	19.8619	0.993521	0.529014	0.498261	29.7002	30.0984	6.41016	2.56688	2.28402	17.3297	16.3663	-2.07154	94.1728	0.771744	0.469785	0.0569893	0.138794	0.0646363	0.0329612	0.023719	0.0212197	0.0312856	0.0268011	0.0154655	0.0169853	0.012737	0.0116743	0.0128276	0.0148044	0.0152298	0.00943514	0.00975374	0.00992801	0.00832253	0.00762937	0.0084727	0.00863625
TCGA-A7-A6VX-01Z-00-DX1.F74DA243-C65A-4997-BCA0-F1C89675978C-32-134232x35910-4194x1122.png	1122	295.056	586.572	2063.41	518.885	2042.27	493.416	2052.4	505.638	2.22245	395.483	0.788362	18.447	0.992523	0.534963	0.498307	27.7816	28.1247	5.92544	2.40897	2.14298	15.9527	15.1567	-3.51235	87.4645	0.769159	0.462707	0.0561332	0.136873	0.0654177	0.0328627	0.0231033	0.0218941	0.0311003	0.0268019	0.0158071	0.0170343	0.0126251	0.0118253	0.0128767	0.0145248	0.0156133	0.00947731	0.00987534	0.00997348	0.00825842	0.0077541	0.00867337	0.00875867
TCGA-A7-A6VY-01Z-00-DX1.38D4EBD7-40B0-4EE3-960A-1F00E8F83ADB-32-110432x39625-3451x1238.png	1238	356.592	684.829	1722.15	659.499	1697.67	634.356	1709.52	646.527	2.08055	467.816	0.754579	20.1838	0.989501	0.551955	0.521025	28.4907	29.1066	6.67031	2.6604	2.37269	17.9872	17.0737	-3.68252	93.312	0.787563	0.504522	0.0579651	0.146494	0.0645556	0.0322316	0.0247881	0.020331	0.0304267	0.0274457	0.0146788	0.0171037	0.0134944	0.0111652	0.0119461	0.0148265	0.0151405	0.00888504	0.0100378	0.00989017	0.0086256	0.0072283	0.00835155	0.00865815
TCGA-A8-A06O-01Z-00-DX1.FA4495B2-5B13-4448-ADCB-EF5316E0955B-32-45312x53504-1416x1672.png	1672	317.084	627.283	742.093	956.361	718.048	932.798	729.534	944.105	2.18704	424.136	0.76303	19.0336	0.984169	0.535614	0.504391	27.4811	27.9867	6.20059	2.495	2.21007	17.0311	16.1253	-3.30825	89.6344	0.769085	0.486954	0.0581035	0.141259	0.0643026	0.0324757	0.0247545	0.0199796	0.0304936	0.0272626	0.0153689	0.0172191	0.0136799	0.0116977	0.0123879	0.014596	0.0154944	0.00955711	0.00998755	0.0104282	0.00869049	0.00777044	0.00852233	0.00846438
TCGA-A8-A06P-01Z-00-DX1.37660D0F-1595-43C5-9D30-58D6CB93B52C-32-39168x54016-1224x1688.png	1688	320.862	640.367	615.729	902.419	591.933	877.766	603.293	889.629	2.13492	424.86	0.791461	19.2109	0.992857	0.538696	0.513029	28.9415	29.3515	6.20697	2.51182	2.24595	16.3596	15.5353	7.02448	89.8259	0.782012	0.464879	0.0562223	0.140049	0.065665	0.0330312	0.0229615	0.0221366	0.0316962	0.0269993	0.0157126	0.0168095	0.0128572	0.0118429	0.0125799	0.0147862	0.0155681	0.00941229	0.00984667	0.0100379	0.00827	0.00772336	0.00842492	0.00864883
TCGA-A8-A06Q-01Z-00-DX1.622AC6E4-DB1A-4C8D-8185-52D4FD1F30B4-32-50432x34048-1576x1064.png	1064	328.632	630.781	620.886	540.108	597.019	516.279	608.447	527.733	2.06057	432.052	0.758116	19.3981	0.991946	0.552498	0.524898	27.4881	27.9292	6.37249	2.56446	2.29687	17.2982	16.4184	2.24333	89.2258	0.785779	0.504984	0.0570425	0.145151	0.0665554	0.031513	0.0254357	0.020003	0.0308504	0.0274956	0.0149018	0.0175737	0.0140532	0.0112703	0.0122137	0.0145374	0.0156028	0.00904655	0.00969724	0.0105256	0.00894877	0.00764265	0.00846945	0.00844695
TCGA-A8-A06R-01Z-00-DX1.41476D0D-BA72-4FB8-B143-9EB679F26D28-32-43264x34560-1352x1080.png	1080	324.328	619.24	749.136	606.323	724.826	582.987	736.496	594.177	2.01019	422.545	0.75952	19.3894	0.992257	0.554562	0.53608	27.6523	28.0384	6.41493	2.59376	2.31622	17.0706	16.2768	-0.87953	87.7822	0.791121	0.503651	0.0576523	0.144711	0.066071	0.0317802	0.0255416	0.0198838	0.03098	0.0276079	0.0151587	0.0173779	0.0138385	0.0114166	0.0120172	0.0143359	0.0153794	0.00927319	0.00960881	0.0100616	0.00878739	0.00759371	0.00841822	0.00826872
TCGA-A8-A06T-01Z-00-DX1.BA8B8FC3-6169-48C1-BE1F-37F140CB4D3B-32-44288x41216-1384x1288.png	1288	343.703	657.536	760.54	680.769	736.007	656.369	747.816	668.096	2.03238	446.445	0.767013	19.8949	0.989844	0.553572	0.531268	28.4078	28.9475	6.60081	2.64803	2.36544	17.4663	16.5903	1.11237	90.712	0.792552	0.497388	0.0581969	0.146047	0.0664889	0.0321866	0.0240884	0.0204999	0.0308583	0.0268501	0.0152511	0.0170869	0.0134279	0.0114408	0.0119447	0.0141819	0.0151813	0.00923471	0.00962262	0.0098779	0.00862863	0.00760503	0.00855491	0.00851325
TCGA-A8-A06U-01Z-00-DX1.56070AB9-A73E-44B8-8051-D93E8F881BBE-32-40704x45824-1272x1432.png	1432	349.766	674.458	637.997	795.505	612.938	771.177	624.951	782.827	2.06049	455.378	0.768326	19.998	0.996503	0.550667	0.526113	28.771	29.1858	6.59277	2.64216	2.35452	17.4605	16.5929	-0.410784	91.9031	0.790281	0.498694	0.057206	0.143719	0.0669952	0.0323664	0.0241969	0.0202761	0.0308617	0.0269869	0.0150204	0.0166964	0.0135098	0.0117125	0.0123826	0.0146537	0.0154436	0.00942387	0.00988719	0.0101008	0.0086276	0.00785651	0.00818025	0.00837785
TCGA-A8-A06X-01Z-00-DX1.21F19EDD-ABCB-4398-B210-D795BB7A34E3-32-46848x62208-1464x1944.png	1944	312.344	618.065	814.672	1027.53	791.598	1003.35	802.63	1014.92	2.18283	416.81	0.77568	18.8781	0.988727	0.538266	0.504663	27.7918	28.1215	6.09896	2.46283	2.20435	16.5425	15.7015	0.270382	89.1295	0.773491	0.480521	0.0567961	0.139112	0.0658281	0.0326634	0.0236921	0.021429	0.0310766	0.0276894	0.0156211	0.0168787	0.013108	0.0117594	0.0125912	0.0145857	0.0158554	0.00956756	0.00981009	0.0103108	0.00858164	0.00786421	0.00866684	0.00847568
TCGA-A8-A06Y-01Z-00-DX1.3BC58446-524E-43F3-AAE6-FBC4AA543E66-32-46848x32000-1464x1000.png	1000	353.927	680.154	711.111	523.468	685.913	498.921	698.059	510.718	2.00103	457.467	0.770919	20.1926	0.989873	0.55303	0.537733	28.9942	29.4446	6.73379	2.69546	2.41753	17.5682	16.6966	-3.54544	91.1993	0.795614	0.496428	0.0577874	0.145301	0.0669569	0.0317387	0.0237642	0.0204835	0.0314384	0.0273485	0.0149269	0.016856	0.0132275	0.0112562	0.0122345	0.0146404	0.0155472	0.00916607	0.00953649	0.00959128	0.00842493	0.00771495	0.0083177	0.00818764
TCGA-A8-A06Z-01Z-00-DX1.2BC8B71D-E01B-4CC1-B5E7-09BB54A5E1F8-32-56576x38144-1768x1192.png	1192	329.048	635.732	815.122	614.851	790.792	591.199	802.455	602.552	2.06087	432.635	0.758266	19.4451	0.989135	0.551949	0.525213	27.8357	28.2588	6.36749	2.56564	2.30075	17.2012	16.3584	-0.419453	89.5518	0.786344	0.501319	0.0569617	0.144616	0.0655771	0.0319995	0.0251135	0.0198556	0.0308077	0.0272729	0.0150148	0.0173705	0.0140944	0.011392	0.0122941	0.0146858	0.0152881	0.00907179	0.00970504	0.0102415	0.00897469	0.00781354	0.00849628	0.00858654
TCGA-A8-A07B-01Z-00-DX1.950B5E4E-C5F0-4445-9F88-E8C32CDFE6DA-32-42752x38144-1336x1192.png	1192	306.026	595.785	716.384	610.234	692.657	587.392	704.053	598.33	1.99966	399.857	0.774292	18.8129	0.993526	0.552069	0.542657	27.4341	27.6969	6.20151	2.52241	2.2749	16.281	15.4931	-0.268123	85.2107	0.793788	0.493173	0.058097	0.142362	0.0676091	0.0325685	0.0244372	0.0210302	0.0308035	0.0275364	0.0151435	0.0170692	0.0133733	0.0115973	0.0122473	0.0143858	0.0158311	0.00920444	0.0101454	0.0102023	0.00870014	0.0078893	0.00857292	0.00845142
TCGA-A8-A07C-01Z-00-DX1.1F069BCA-D2B3-49CF-81FD-9EBA49A3439F-32-58112x37120-1816x1160.png	1160	322.417	609.254	948.214	602.043	924.728	578.432	935.977	589.802	1.99414	418.842	0.749136	19.3122	0.987702	0.562244	0.539649	27.12	27.6108	6.44423	2.59588	2.32776	17.1529	16.3506	-3.90177	87.2797	0.79445	0.515325	0.0592799	0.146169	0.0656929	0.0314167	0.0255532	0.0188363	0.0297566	0.0277692	0.0149387	0.0170043	0.0137429	0.0116817	0.0119636	0.0145289	0.015732	0.00914992	0.00973366	0.0101828	0.00891813	0.00780477	0.00865018	0.00835052
TCGA-A8-A07E-01Z-00-DX1.AC684481-979A-46F9-91D7-C56CE85992F2-32-77824x110336-2432x3448.png	3448	320.177	608.263	1477.74	2452.74	1453.87	2429.57	1465.3	2440.61	1.98731	415.137	0.7594	19.2222	0.992806	0.56034	0.542334	27.3028	27.732	6.40142	2.58553	2.31513	16.8819	16.1082	1.47724	86.6874	0.795823	0.508498	0.0589424	0.144936	0.0666207	0.0321753	0.0250214	0.0196568	0.030357	0.027699	0.0147918	0.0170833	0.0134814	0.0113629	0.012089	0.0143369	0.0157619	0.00917055	0.00980551	0.0101248	0.00889906	0.00792274	0.00847771	0.00837617
TCGA-A8-A07F-01Z-00-DX1.E6FE5B3A-A412-4E7B-A710-7DFD3596F4E3-32-75776x61696-2368x1928.png	1928	308.186	591.696	1738.05	1246.45	1716.59	1221.31	1726.83	1233.4	2.04214	403.299	0.780612	18.8386	0.989658	0.555602	0.529628	27.5981	27.9904	6.18625	2.50856	2.25029	16.2216	15.4405	5.39831	86.2694	0.790226	0.48448	0.0582011	0.14288	0.0670005	0.0331164	0.0233	0.02086	0.0310754	0.0275143	0.0153025	0.0166813	0.0129123	0.0111778	0.0122976	0.0144483	0.0157267	0.0093607	0.00979954	0.0100644	0.00837143	0.0075791	0.00857087	0.00845077
TCGA-A8-A07G-01Z-00-DX1.37E8A762-8141-4BE6-935A-B3DCB712BB4A-32-50432x47872-1576x1496.png	1496	297.591	569.998	817.746	773.484	795.645	749.879	806.214	761.159	2.04205	389.3	0.762869	18.5505	0.991646	0.551436	0.531161	26.5839	26.9294	6.0918	2.48237	2.22343	16.3046	15.5915	1.31312	84.4819	0.785257	0.499098	0.0588937	0.141759	0.0663386	0.0323613	0.0252381	0.0195287	0.0302706	0.0278951	0.0152983	0.0173479	0.0135885	0.011232	0.0122708	0.0148212	0.0158428	0.00933659	0.00998299	0.0102008	0.00893509	0.00801786	0.00848157	0.0085942
TCGA-A8-A07I-01Z-00-DX1.37E7BB2E-8210-4216-B75F-0FD06D6C9AE3-32-54528x77568-1704x2424.png	2424	317.442	618.906	849.96	1454.62	826.777	1430.45	837.861	1442.03	2.07848	418.417	0.770178	19.0846	0.988235	0.54804	0.522471	27.6874	28.0809	6.24334	2.52224	2.25405	16.7143	15.8921	-0.868674	88.1641	0.7847	0.492029	0.0590085	0.141689	0.0664343	0.0328825	0.0243418	0.0204933	0.030731	0.0273518	0.0152505	0.0171363	0.0133485	0.01148	0.0124954	0.0146681	0.0154878	0.00923031	0.00981627	0.0100272	0.00870245	0.00763893	0.00852142	0.00854975
TCGA-A8-A0A1-01Z-00-DX1.CA64E221-E2A8-42B5-B611-25B9FE5FB0B0-32-53504x86784-1672x2712.png	2712	329.174	647.958	1132.24	1667.24	1107.73	1643.33	1119.48	1654.81	2.12727	436.069	0.772466	19.3898	0.986533	0.540479	0.512626	28.1787	28.6882	6.30744	2.54032	2.26833	17.101	16.1937	4.06898	90.5562	0.779117	0.484142	0.0581267	0.143055	0.0652833	0.0328534	0.024056	0.0204441	0.0310315	0.0268711	0.0150819	0.0171968	0.013493	0.0115835	0.0126374	0.0145807	0.0151928	0.00936058	0.00999928	0.0102875	0.00860505	0.00734096	0.00844978	0.0085206
TCGA-A8-A0A2-01Z-00-DX1.47BCDF13-1065-466A-B7CB-F91F5EAD7D91-32-41728x114432-1304x3576.png	3576	308.779	593.878	686.765	1408.1	663.649	1384.66	674.754	1395.94	2.00389	402.882	0.772246	18.8783	0.992642	0.55741	0.541394	27.4371	27.7916	6.22386	2.52702	2.27646	16.2912	15.5718	-2.40586	85.6849	0.79494	0.493905	0.057241	0.143025	0.0669853	0.0318602	0.024176	0.0208763	0.0311654	0.0278573	0.0151662	0.0167752	0.0132618	0.01183	0.012157	0.0148537	0.0154991	0.00908017	0.0098655	0.00974231	0.00856111	0.00789971	0.00852074	0.00852611
TCGA-A8-A0A4-01Z-00-DX1.06C38F98-F34B-49F0-AFB5-7F0086188346-32-36096x97536-1128x3048.png	3048	299.709	579.65	585.493	2470.1	563.037	2446.54	573.738	2457.8	1.99084	390.81	0.766872	18.646	0.984533	0.553933	0.543802	26.9885	27.2856	6.13937	2.50481	2.24869	16.1869	15.4526	-2.23386	84.2911	0.79434	0.497852	0.0576567	0.143294	0.0668304	0.0313903	0.024615	0.0206013	0.0312289	0.0277729	0.0150917	0.0172274	0.0131556	0.0114815	0.0123836	0.0143778	0.0157839	0.00929378	0.00982143	0.0101033	0.00874609	0.00771086	0.00840456	0.00844398
TCGA-A8-A0A7-01Z-00-DX1.A0FD4EEF-B536-47C1-BDA1-7AC71BA3E978-32-37632x52992-1176x1656.png	1656	358.006	698.498	577.613	820.757	552.575	795.895	564.603	807.811	2.16092	476.586	0.753933	20.1627	0.982632	0.548693	0.504666	28.727	29.3094	6.55683	2.6104	2.3228	18.1345	17.1468	-0.752443	95.3298	0.777337	0.498972	0.0580951	0.144102	0.0643448	0.032498	0.0254017	0.0193131	0.0306673	0.0266541	0.014988	0.0174841	0.0138028	0.011411	0.0121005	0.0145402	0.0152183	0.00918996	0.00976934	0.0103817	0.00876971	0.00770768	0.00846031	0.00844477
TCGA-A8-A0A9-01Z-00-DX1.16524DDD-539D-4E47-9A8F-1B910D4FEC2D-32-38144x26368-1192x824.png	824	317.475	606.414	593.831	461.509	570.365	437.819	581.61	449.188	1.95791	412.149	0.762675	19.1759	0.989455	0.558157	0.553755	27.5888	27.9531	6.37595	2.5883	2.31307	16.6692	15.9261	-1.68337	85.9133	0.797745	0.50416	0.0592601	0.143771	0.0659429	0.0321501	0.0247399	0.020127	0.0306804	0.0279059	0.0153456	0.0171194	0.0135161	0.0114823	0.0123982	0.0143837	0.0154401	0.00942299	0.00989305	0.00989886	0.00851544	0.00750273	0.00849999	0.00822768
TCGA-A8-A0AB-01Z-00-DX1.103ED338-A0F9-403B-A10C-49840BD60EB8-32-35584x42752-1112x1336.png	1336	297.799	574.921	541.768	683.432	518.534	660.832	529.627	671.65	1.99506	388.323	0.768519	18.5779	0.989855	0.552518	0.540168	26.7782	27.1143	6.14957	2.49762	2.24083	16.195	15.4458	-3.87315	83.9705	0.791371	0.497927	0.0570598	0.143772	0.0674	0.0324973	0.024518	0.0202968	0.0307808	0.0280498	0.014976	0.017488	0.0136284	0.011351	0.0122222	0.0146301	0.0159729	0.00942427	0.0100334	0.0102186	0.00878411	0.00799862	0.00884938	0.00849813
TCGA-A8-A0AD-01Z-00-DX1.A831FB53-7605-4138-9341-6BBCA284441C-32-42240x48896-1320x1528.png	1528	325.86	648.054	650.826	822.59	625.428	799.554	637.626	810.567	2.14412	433.173	0.778253	19.2931	0.988793	0.540813	0.511223	28.5692	29.031	6.24183	2.51673	2.24521	16.8046	15.949	1.15785	90.4393	0.780277	0.47268	0.0564963	0.141175	0.0645901	0.0328415	0.0237011	0.0217008	0.0311553	0.0278146	0.0156729	0.0171891	0.0128885	0.0111846	0.0124414	0.0152606	0.0158117	0.00926247	0.00996421	0.0101441	0.00844162	0.00779838	0.00841526	0.00867993
TCGA-A8-A075-01Z-00-DX1.8E06AF51-951F-48E8-934E-42A455F65E5F-32-40704x58624-1272x1832.png	1832	319.657	626.488	669.725	974.187	646.356	950.161	657.533	961.648	2.11194	426.011	0.769644	19.0742	0.985409	0.546647	0.518747	27.6394	28.0147	6.19696	2.50429	2.24643	16.8619	15.9844	-0.225983	89.0575	0.779027	0.492066	0.0586876	0.141601	0.0663343	0.0330854	0.0242863	0.020391	0.031036	0.027206	0.015606	0.0170844	0.0135795	0.0109916	0.0124133	0.0143626	0.0156236	0.00948601	0.00978693	0.0102069	0.00862184	0.0076549	0.00857011	0.00865741
TCGA-A8-A076-01Z-00-DX1.BAAC4F9C-0C04-42FB-95F4-D765305089B8-32-95744x73472-2992x2296.png	2296	319.722	631.915	1796.03	1526.22	1772.17	1501.89	1783.63	1513.52	2.15791	422.477	0.787542	19.155	0.993216	0.537981	0.509252	28.7153	29.0507	6.18352	2.50599	2.23836	16.443	15.6576	3.12451	89.6674	0.781176	0.467338	0.0555127	0.138951	0.0660971	0.0320217	0.0232099	0.0217198	0.0320472	0.0272356	0.0152608	0.0166333	0.0127647	0.0116604	0.0126704	0.015003	0.0155154	0.0093348	0.00978093	0.0100424	0.00822533	0.00788287	0.0085998	0.0086198
TCGA-A8-A079-01Z-00-DX1.DC32BC20-A3BC-43B3-B69F-1E71E289EA34-32-58112x73472-1816x2296.png	2296	341.748	670.087	821.798	1051.38	797.82	1026.15	809.316	1038.29	2.19352	452.778	0.769854	19.7202	0.992542	0.541284	0.505002	28.7541	29.2087	6.40199	2.56948	2.2837	17.3861	16.4576	2.14597	92.9651	0.776399	0.483293	0.0568384	0.141983	0.0651488	0.0323609	0.0241144	0.0207853	0.0309731	0.0268897	0.0152822	0.0169706	0.0132784	0.0117269	0.0122475	0.0144248	0.0153755	0.00939464	0.00993082	0.00999375	0.00856008	0.00781526	0.00855334	0.00838617
TCGA-A8-A07J-01Z-00-DX1.FE16248C-D890-4750-A9FC-5F72BE8D8B85-32-42240x44288-1320x1384.png	1384	304.008	593.248	707.326	714.681	682.133	693.186	694.145	703.439	2.03259	396.778	0.787583	18.7356	0.99242	0.548484	0.533741	27.7979	28.1364	6.13014	2.49924	2.24866	15.9382	15.1697	-11.5564	85.4433	0.791825	0.479216	0.0566231	0.14174	0.0676199	0.0323321	0.0229335	0.0217809	0.0315833	0.0278619	0.0152522	0.0168484	0.0129589	0.0116994	0.012652	0.0146955	0.0156411	0.00924126	0.00994812	0.0101164	0.00845354	0.00767044	0.00866453	0.00835745
TCGA-A8-A07L-01Z-00-DX1.D9E1051F-724E-4E88-940A-C97005DC5BEB-32-39168x39168-1224x1224.png	1224	303.955	595.346	616.494	651.177	593.264	627.768	604.353	638.961	1.9771	394.775	0.779021	18.7885	0.99546	0.546025	0.543847	27.3254	27.6825	6.20681	2.52461	2.27497	16.1848	15.4434	-8.80728	84.5482	0.795563	0.490159	0.0587603	0.142819	0.0676181	0.032756	0.0242374	0.0203651	0.0310993	0.027525	0.015051	0.0171556	0.0131017	0.0116927	0.0123959	0.014686	0.0159852	0.00920816	0.00963771	0.00997667	0.00842407	0.00763264	0.00852705	0.0084319
TCGA-A8-A07O-01Z-00-DX1.3D657129-F2A7-4BC1-A910-805FBDCE2212-32-42240x58624-1320x1832.png	1832	365.315	702.385	654.869	857.627	629.688	832.602	641.791	844.614	2.12797	480.672	0.761071	20.3785	0.984039	0.552967	0.509679	29.1189	29.6114	6.65166	2.64965	2.36615	18.1042	17.1217	1.69829	95.4683	0.784156	0.497667	0.0580806	0.144719	0.0659983	0.0315802	0.0253859	0.0198894	0.0307741	0.0270492	0.0148746	0.0176888	0.0134079	0.0113899	0.0123241	0.0146646	0.0153468	0.00934152	0.00992835	0.0102096	0.00875576	0.00756716	0.00854494	0.00831616
TCGA-A8-A07P-01Z-00-DX1.2C7C75EF-EEE2-4A42-994C-A1A40850C87A-32-27392x40192-856x1256.png	1256	303.266	577.199	486.7	667.414	464.073	644.155	474.866	655.316	1.97409	393.259	0.761159	18.7291	0.991433	0.558117	0.544733	26.6701	26.9807	6.23614	2.53032	2.27758	16.4495	15.6941	0.465454	84.1501	0.794759	0.506539	0.0590073	0.144036	0.066945	0.0322566	0.0254351	0.0189405	0.0305891	0.0280626	0.0152754	0.0173658	0.0139216	0.0116832	0.0120277	0.0145033	0.0158985	0.00951339	0.00959991	0.00992096	0.00885239	0.00788457	0.00861756	0.0084381
TCGA-A8-A07R-01Z-00-DX1.D716752E-86AF-468B-A905-A7894B978F22-32-35584x42752-1112x1336.png	1336	312.688	593.49	547.623	683.533	524.735	659.937	535.728	671.27	1.95854	405.509	0.757251	19.016	0.990816	0.560003	0.55021	26.8771	27.294	6.35374	2.57311	2.30098	16.7357	15.9736	-2.56578	85.1847	0.796473	0.510678	0.0599034	0.14536	0.066743	0.0323093	0.0252021	0.0198031	0.0301521	0.0276278	0.0150275	0.0170721	0.01348	0.0115122	0.0121674	0.0142502	0.0156616	0.00930363	0.00981139	0.010134	0.00896123	0.00752204	0.00856697	0.00832709
TCGA-A8-A07S-01Z-00-DX1.34AFF327-E7FD-49E1-B918-0C09129581FB-32-38656x46848-1208x1464.png	1464	298.955	574.03	593.997	835.623	570.613	813.26	581.798	823.909	1.9534	389.766	0.763923	18.6142	0.99687	0.559239	0.552982	26.7596	26.9982	6.17964	2.52013	2.26869	16.2286	15.4937	5.77147	83.3541	0.796972	0.506583	0.0579691	0.143548	0.0673955	0.0317285	0.0251467	0.0198934	0.0304141	0.0279513	0.0148913	0.0172272	0.0138359	0.0116008	0.0122428	0.0145419	0.0158661	0.00928763	0.00980854	0.0102358	0.00883601	0.00784151	0.00846538	0.00817549
TCGA-A8-A07U-01Z-00-DX1.69D356C3-C7FC-47E9-B753-BE421263343F-32-49920x108288-1560x3384.png	3384	338.69	644.564	725.987	2219.54	701.837	2195.37	713.411	2206.97	2.0088	440.776	0.7591	19.7156	0.991708	0.558705	0.538574	28.0182	28.5435	6.54622	2.63236	2.35372	17.3844	16.549	-0.959617	89.5485	0.793518	0.504397	0.0587386	0.145473	0.0659684	0.0319471	0.0251779	0.0192837	0.0302828	0.0274884	0.014978	0.0173251	0.0134996	0.0118628	0.0122273	0.0144064	0.0154367	0.00922891	0.00981904	0.0100142	0.0086336	0.00766216	0.00860063	0.00831604
TCGA-A8-A07W-01Z-00-DX1.5970CF33-D675-4AF4-800F-7182AA1A44A6-32-61440x107264-1920x3352.png	3352	288.059	552.854	1255.8	2564.27	1233.13	2541.9	1243.98	2552.6	2.0174	376.547	0.772994	18.2475	0.99506	0.552574	0.541692	26.4523	26.7219	6.03608	2.4668	2.21075	15.8654	15.1632	2.24204	82.5124	0.788223	0.494818	0.0583137	0.140732	0.067929	0.0319714	0.0242225	0.0207194	0.03056	0.0279412	0.0151596	0.0171543	0.0135071	0.0119732	0.0125241	0.0145594	0.0157222	0.00930956	0.00991697	0.0100422	0.00866141	0.00805528	0.00865981	0.00857625
TCGA-A8-A07Z-01Z-00-DX1.713945D9-6855-456D-87FB-EF8AF8980F51-32-30464x55552-952x1736.png	1736	385.467	755.457	506.302	972.484	480.385	946.421	492.868	958.855	2.22041	515.682	0.770742	20.9058	0.987539	0.542876	0.492343	30.2649	30.7982	6.71553	2.66413	2.36791	18.6877	17.5784	-1.33975	100.084	0.774052	0.485842	0.0582136	0.142498	0.0653599	0.0336486	0.0241551	0.0198299	0.0316444	0.0261113	0.0152222	0.0171345	0.0132359	0.0110534	0.0124686	0.0145876	0.0151426	0.00933978	0.00986643	0.0104279	0.0086666	0.00731214	0.00852534	0.00809946
TCGA-A8-A082-01Z-00-DX1.5F82E38D-0DFD-4C2C-BC05-8F0EFEFC507C-32-80896x92416-2528x2888.png	2888	322.815	625.179	1087.39	864.588	1063.41	841.124	1074.92	852.358	2.06002	426.362	0.766447	19.2099	0.991389	0.556583	0.532806	27.8212	28.151	6.31655	2.54609	2.27956	16.8485	16.0184	-0.260003	88.5856	0.788242	0.497947	0.0586669	0.142552	0.066952	0.0321334	0.0245699	0.0201438	0.0307912	0.027307	0.0153797	0.0171321	0.0132779	0.0115083	0.0120888	0.0147837	0.0156443	0.0094034	0.0100426	0.00999346	0.00867774	0.00798098	0.0087857	0.0084634
TCGA-A8-A084-01Z-00-DX1.2B52D1B8-5AD4-4BD6-ADF7-9D65B8EE2621-32-78336x51456-2448x1608.png	1608	308.835	600.489	1514.67	555.155	1490.92	532.223	1502.24	543.162	2.02918	405.303	0.767294	18.8729	0.990854	0.551616	0.534436	27.2627	27.6978	6.23471	2.52134	2.26048	16.4819	15.6882	3.7449	86.177	0.789408	0.495275	0.0579128	0.143717	0.0663566	0.0319786	0.0243588	0.0211199	0.0303993	0.0278534	0.0152101	0.0170247	0.0133069	0.0115047	0.012293	0.0147323	0.0156672	0.00923658	0.00993611	0.0101395	0.00866666	0.00775663	0.00861823	0.00847407
TCGA-A8-A086-01Z-00-DX1.E5FD8C53-2068-4018-B3C0-08EED253ACD2-32-61952x97536-1936x3048.png	3048	315.978	605.917	1102.6	2098.78	1079.35	2074.88	1090.51	2086.35	1.96575	408.499	0.772005	19.1176	0.99275	0.554088	0.547523	27.6389	28.0496	6.37749	2.58344	2.31693	16.5185	15.7516	1.83366	85.5985	0.796607	0.493969	0.0584748	0.143798	0.0670775	0.032283	0.0242449	0.0211184	0.030658	0.0275514	0.015032	0.0169609	0.0131871	0.0116177	0.0122269	0.0146282	0.0156692	0.00914973	0.00979799	0.0100035	0.00854172	0.00773564	0.00852379	0.00848475
TCGA-A8-A08A-01Z-00-DX1.3BB777A0-8652-4483-8DD6-8EB88AB0A8EF-32-78336x59136-2448x1848.png	1848	336.934	654.681	1958.47	1000.24	1933.33	976.587	1945.44	987.896	2.06501	442.938	0.774931	19.6898	0.991851	0.552181	0.526312	28.7062	29.0929	6.48154	2.60545	2.32309	17.0844	16.2274	-2.46991	90.6647	0.787991	0.490813	0.0572206	0.144029	0.0668734	0.0329418	0.0236346	0.0209844	0.0312966	0.0266284	0.0153484	0.0167486	0.0131734	0.011251	0.0120319	0.0140803	0.0152126	0.00935702	0.00980923	0.0100686	0.00846148	0.00767825	0.00867729	0.00811964
TCGA-A8-A08B-01Z-00-DX1.416316FD-E8BF-402C-939A-08920F08A181-32-70656x90368-2208x2824.png	2824	371.697	722.22	509.184	2052.51	483.164	2027.33	495.666	2039.44	2.15477	490.975	0.767794	20.6017	0.986854	0.546047	0.504439	29.8409	30.3927	6.72795	2.66579	2.37497	18.1595	17.1979	-0.938178	96.9633	0.781193	0.486882	0.0593387	0.142704	0.0645452	0.0336826	0.0238818	0.0200084	0.030606	0.0265388	0.0151319	0.0173594	0.0134968	0.0111453	0.0121045	0.0146833	0.0151792	0.0091603	0.0097382	0.0102919	0.00868877	0.00737299	0.00849374	0.00826572
TCGA-A8-A08C-01Z-00-DX1.0602211C-1098-4711-AA41-8F56B11DB36F-32-83968x91392-2624x2856.png	2856	318.243	601.275	914.509	2102.26	891.044	2078.77	902.303	2089.99	1.93233	407.43	0.760908	19.1917	0.991491	0.563687	0.558796	27.3853	27.865	6.48095	2.62328	2.34503	16.5373	15.8693	3.39713	85.1918	0.804291	0.505843	0.0576932	0.146606	0.066276	0.0309265	0.0239186	0.0203532	0.0304428	0.0270625	0.0149513	0.0163148	0.0132323	0.011771	0.0121898	0.014306	0.0152829	0.00923887	0.00945333	0.00978799	0.00864764	0.0077119	0.00838563	0.00832641
TCGA-A8-A08F-01Z-00-DX1.9D2222F6-1425-46FD-BC94-728EF835FAC2-32-56576x38656-1768x1208.png	1208	344.98	660.06	862.446	688.334	837.862	664.054	849.625	675.7	2.05318	451.569	0.762405	19.8764	0.990665	0.554311	0.526832	28.3776	28.8254	6.54094	2.62805	2.35317	17.5629	16.6689	3.30561	91.235	0.788172	0.501465	0.0577431	0.144261	0.0668096	0.0317625	0.0247264	0.0202508	0.0306053	0.0274518	0.0149538	0.017098	0.0137195	0.0113765	0.0122062	0.0144407	0.015369	0.00896551	0.00977152	0.0102704	0.00887906	0.00753626	0.0085469	0.00840232
TCGA-A8-A08G-01Z-00-DX1.C3BB7FEC-91B7-4B45-8DFC-36CABCC0FD57-32-47872x51456-1496x1608.png	1608	333.91	646.589	835.061	874.466	810.347	851.02	822.189	862.217	2.05735	437.288	0.761158	19.5311	0.990423	0.554686	0.52933	27.9129	28.4365	6.4552	2.59331	2.31334	17.2002	16.3503	-3.37016	89.8604	0.789921	0.501902	0.0584947	0.145143	0.065308	0.0322572	0.0243881	0.0204793	0.0305199	0.0269727	0.0151918	0.016621	0.0137222	0.0113941	0.0123833	0.0146204	0.0151993	0.00920632	0.00962068	0.0101702	0.00874139	0.007841	0.00851626	0.00839105
TCGA-A8-A08I-01Z-00-DX1.96A0065E-5430-40F6-835E-1A7238A79DDA-32-98304x95488-3072x2984.png	2984	354.411	696.023	1367.3	1894.67	1341.92	1869.78	1354.13	1881.76	2.19424	467.626	0.775681	20.0548	0.984848	0.547935	0.505634	29.9005	30.3229	6.49739	2.60224	2.31898	17.4169	16.527	-4.14326	94.7571	0.781316	0.479882	0.0572106	0.13955	0.0650783	0.0320479	0.0234648	0.0205804	0.0309631	0.0270269	0.0152263	0.0166868	0.0130989	0.0114419	0.0126194	0.0144856	0.0154023	0.00924176	0.00960426	0.00987589	0.0084493	0.00744701	0.00843527	0.00861569
TCGA-A8-A08J-01Z-00-DX1.4607286A-033B-4C44-8306-50DB9C596166-32-98304x109824-3072x3432.png	3432	324.954	622.646	1916.49	2201.71	1893.18	2177.34	1904.37	2189.03	2.04739	422.545	0.76879	19.3211	0.993506	0.55286	0.534175	27.785	28.3055	6.40859	2.58502	2.30773	16.8372	16.0709	-3.34412	88.1219	0.791584	0.493465	0.0582993	0.144356	0.0662533	0.0318175	0.023936	0.0208287	0.0303851	0.0268307	0.0150604	0.0170962	0.0131988	0.0116091	0.0122115	0.0143818	0.0153065	0.00934074	0.00973485	0.00997052	0.00859071	0.00752971	0.00863326	0.00831789
TCGA-A8-A08L-01Z-00-DX1.0FC652B1-336D-4198-93FE-58D2214866D3-32-66048x99584-2064x3112.png	3112	326.692	628.835	1069.63	811.961	1046.34	787.462	1057.45	799.21	2.03825	427.325	0.763719	19.389	0.990732	0.55301	0.529629	27.7873	28.2243	6.39305	2.57649	2.30933	17.0335	16.206	-1.68389	88.6633	0.788764	0.499718	0.0588946	0.144164	0.0660209	0.0323822	0.0247654	0.019925	0.0307077	0.0269637	0.0150028	0.017069	0.013624	0.0113601	0.0121732	0.0145802	0.0155344	0.00932255	0.00965278	0.0102142	0.00870818	0.007657	0.00852242	0.00833755
TCGA-A8-A08O-01Z-00-DX1.BC87C01D-F081-41CA-939A-875C61588E88-32-43776x29440-1368x920.png	920	311.357	598.464	697.773	464.347	674.107	441.087	685.411	452.236	1.97299	404.792	0.7762	19.0092	0.993384	0.552775	0.54704	27.5204	27.9053	6.32115	2.56381	2.29063	16.4361	15.6846	-2.63031	85.368	0.796691	0.492833	0.0588515	0.144041	0.067444	0.0331398	0.024095	0.0208862	0.0309653	0.0272551	0.0150451	0.0166951	0.0132045	0.0114304	0.0120036	0.0146769	0.0155689	0.00941368	0.00945896	0.00956907	0.00851002	0.00765008	0.0085965	0.00834579
TCGA-A8-A08P-01Z-00-DX1.431A1290-9CF4-4CE7-A9F0-13F9ADA46ADA-32-67584x46336-2112x1448.png	1448	354.438	694.739	1030.45	701.995	1003.7	678.601	1016.58	689.75	2.19208	470.842	0.771577	20.0835	0.988776	0.541367	0.499744	29.308	29.8926	6.51075	2.59812	2.31117	17.715	16.7479	-4.83606	95.1209	0.775825	0.480751	0.0581657	0.141906	0.0643747	0.0331833	0.0236568	0.0208276	0.030818	0.0270903	0.0154784	0.0170419	0.0130687	0.0112409	0.0123928	0.0145833	0.0155831	0.00928728	0.00993028	0.0101386	0.00837882	0.00761797	0.00841136	0.00830099
TCGA-A8-A08R-01Z-00-DX1.72FBD9A3-5EB9-4855-89EB-697883C2EA9B-32-38144x93440-1192x2920.png	2920	321.136	614.041	608.056	1316.31	583.715	1293.62	595.414	1304.53	2.04129	421.257	0.771658	19.1682	0.991817	0.557851	0.530565	27.4722	27.8155	6.29514	2.54748	2.29749	16.8503	16.0146	-8.27779	87.8742	0.787942	0.499816	0.0574996	0.144589	0.0686923	0.0325633	0.0241634	0.0190861	0.0312373	0.0268647	0.015411	0.0174511	0.0133063	0.0110504	0.0122009	0.0144922	0.0160178	0.00937841	0.00963136	0.00986245	0.00890423	0.00738388	0.00859162	0.00869685
TCGA-A8-A08S-01Z-00-DX1.C0E044C2-FC3F-4E3D-A779-A725FF375F21-32-52480x43264-1640x1352.png	1352	327.812	638.327	832.262	687.644	808.14	663.512	819.718	675.074	2.0515	428.831	0.780673	19.4318	0.988629	0.548494	0.526831	28.4815	28.8551	6.36889	2.57103	2.30951	16.7656	15.9148	-5.7363	89.0516	0.788649	0.484559	0.0569423	0.142709	0.0667217	0.0329445	0.0235717	0.0212022	0.0315294	0.0281671	0.0155044	0.0171407	0.0127247	0.0110225	0.0122215	0.0148078	0.0155134	0.00930836	0.00969681	0.00951574	0.00843059	0.00754363	0.0082985	0.00842193
TCGA-A8-A08T-01Z-00-DX1.ABA1ABF2-DDB1-4E31-89DC-0F7821311D11-32-35584x48896-1112x1528.png	1528	316.849	606.706	601.469	793.537	579.003	768.747	589.768	780.638	1.98038	409.82	0.773852	19.1508	0.993865	0.553907	0.545142	27.8166	28.2117	6.36512	2.5785	2.3076	16.494	15.76	-3.48173	86.0121	0.795448	0.491628	0.0591378	0.142846	0.0663974	0.0331938	0.0236368	0.0208907	0.0307543	0.0280495	0.0153333	0.0166725	0.013075	0.0111805	0.0121102	0.0145267	0.0154893	0.00947912	0.00970086	0.00994569	0.00838069	0.00781022	0.00841571	0.00837889
TCGA-A8-A08X-01Z-00-DX1.01FB49CC-6B8E-4317-8C42-6B6D81187A40-32-38144x33536-1192x1048.png	1048	338.019	657.18	521.47	590.858	497.248	566.421	508.81	578.124	2.08354	445.438	0.757882	19.6946	0.992352	0.550008	0.521657	28.1948	28.6611	6.47623	2.59448	2.32156	17.4731	16.597	4.76383	91.0785	0.785006	0.500652	0.059259	0.14291	0.0653368	0.0327688	0.0251346	0.0194893	0.0303691	0.0272571	0.0154773	0.0170918	0.0136606	0.0110776	0.0122158	0.0149476	0.0157537	0.00943332	0.0098154	0.0101922	0.00893271	0.00771187	0.00832598	0.00848991
TCGA-A8-A08Z-01Z-00-DX1.D0AADCA6-C27C-4FB8-89C1-94B5901146E7-32-49920x96000-1560x3000.png	3000	352.836	685.402	826.419	2168.54	801.993	2142.9	813.754	2155.22	2.10762	463.94	0.771413	20.1524	0.988851	0.545689	0.513243	29.2383	29.8131	6.59044	2.63543	2.35227	17.6772	16.7317	6.26464	93.6397	0.783808	0.485088	0.0584165	0.143575	0.0650497	0.0333761	0.0237157	0.0205614	0.0314333	0.0270738	0.0154756	0.0171202	0.0130326	0.0113277	0.0122129	0.014504	0.0154384	0.00908796	0.00976939	0.00999536	0.00834288	0.00743112	0.00842686	0.00827679
TCGA-A8-A091-01Z-00-DX1.1F38CADB-A093-416E-A8A8-31E61CD730BA-32-46336x39680-1448x1240.png	1240	358.898	702.999	851.398	689.979	825.823	665.357	838.109	677.163	2.07691	471.614	0.771787	20.1982	0.988789	0.547996	0.525812	29.3978	29.8551	6.61964	2.65045	2.36924	17.5886	16.6789	2.18054	93.5397	0.789473	0.490645	0.0567241	0.143612	0.0663457	0.0323326	0.023988	0.020689	0.0311031	0.0270589	0.0150445	0.0169741	0.0129066	0.0117277	0.0121532	0.0147552	0.015244	0.00928063	0.00969088	0.0101011	0.00855786	0.00737505	0.00835251	0.00831899
TCGA-A8-A092-01Z-00-DX1.2A55EA0C-47CD-426B-9697-F2B761730585-32-49408x64256-1544x2008.png	2008	339.426	655.778	803.395	676.285	778.61	652.284	790.511	663.759	2.07257	446.775	0.766629	19.7504	0.987102	0.551742	0.52249	28.4211	28.9278	6.50098	2.60457	2.32447	17.4199	16.493	-0.19261	91.1767	0.78649	0.49491	0.0576704	0.144782	0.065734	0.0325786	0.0246613	0.0209222	0.0304145	0.0271066	0.0149979	0.0171424	0.0132506	0.0115516	0.0118228	0.014411	0.0155109	0.00925298	0.00979609	0.0101448	0.00844105	0.00770633	0.00843638	0.008377
TCGA-A8-A093-01Z-00-DX1.1C8056D1-11CD-482D-9A23-3A9D1B4E63F0-32-46848x87808-1464x2744.png	2744	322.694	632.569	933.861	593.928	911.336	568.383	922.094	580.657	2.08001	424.475	0.784199	19.273	0.984236	0.547342	0.521167	28.5511	28.8974	6.26606	2.54086	2.2756	16.5276	15.6764	-1.29935	88.9475	0.786657	0.477061	0.0567671	0.141929	0.0666921	0.0326561	0.0237119	0.0217751	0.0322603	0.0269203	0.0152577	0.0169526	0.0129096	0.0113436	0.0123241	0.0142483	0.0151782	0.00923087	0.00955416	0.0100033	0.0085081	0.0074341	0.00835737	0.00848844
TCGA-A8-A095-01Z-00-DX1.97072E53-7323-4836-9D58-22B7C346A7CE-32-59648x41728-1864x1304.png	1304	324.07	636.798	984.684	751.042	960.306	727.538	971.997	738.826	2.09483	428.568	0.770088	19.2398	0.988361	0.54046	0.518281	27.8707	28.1972	6.2841	2.53603	2.26819	17.0051	16.1186	-2.48784	88.8656	0.777233	0.491891	0.0594135	0.139746	0.0668214	0.0331184	0.0245917	0.0197659	0.0311925	0.0273096	0.0156105	0.017356	0.0137125	0.0113701	0.0127128	0.0146275	0.0156042	0.00945033	0.0100509	0.0103976	0.00879195	0.00825467	0.0085079	0.00830985
TCGA-A8-A097-01Z-00-DX1.4D06990E-E759-40F0-9106-59408CF350E5-32-38144x55040-1192x1720.png	1720	322.328	627.305	689.987	772.778	666.387	748.682	677.651	760.248	2.07379	423.772	0.768761	19.2387	0.989151	0.548053	0.523594	27.7872	28.2955	6.32302	2.54669	2.27722	16.8406	16.0127	-1.04441	88.7458	0.786051	0.491055	0.0585802	0.143437	0.0658717	0.0325704	0.0243024	0.0208287	0.0310916	0.0276154	0.0149678	0.0165683	0.0134207	0.0114038	0.012432	0.014786	0.0154538	0.00925656	0.00964392	0.00986386	0.00867515	0.00795745	0.00844084	0.00840827
TCGA-A8-A099-01Z-00-DX1.B19C28B5-FEBC-49B4-A60E-E6B85BB00DD7-32-46336x55552-1448x1736.png	1736	331.099	647.55	721.123	953.677	697.017	929.459	708.558	941.058	2.07601	435.771	0.771871	19.4533	0.988627	0.549591	0.524623	28.3448	28.8598	6.39832	2.56997	2.29503	16.9585	16.0773	5.6222	89.9578	0.787293	0.486557	0.0580541	0.143773	0.0656448	0.0321692	0.02384	0.020928	0.0310082	0.0272129	0.0153633	0.0170606	0.012853	0.0115385	0.0123777	0.0145915	0.0154582	0.00922236	0.00968349	0.0100563	0.00852536	0.00789827	0.0085003	0.00830136
TCGA-A8-A09A-01Z-00-DX1.78773A6C-BA8A-46BE-AC2A-9C6FDAB45622-32-30464x59648-952x1864.png	1864	330.605	646.519	475.544	973.312	452.226	948.211	463.408	960.238	2.11884	438.002	0.774725	19.4685	0.987864	0.547363	0.512164	28.4198	28.828	6.31297	2.54195	2.27626	17.0399	16.1521	-1.29919	90.9917	0.781649	0.484822	0.0571112	0.142434	0.0665492	0.032977	0.0238841	0.0209236	0.0316249	0.027005	0.0154374	0.0170555	0.0135584	0.0112346	0.0122167	0.0145344	0.0156538	0.00941686	0.0096981	0.01046	0.00856792	0.00754325	0.00829539	0.00852926
TCGA-A8-A09B-01Z-00-DX1.97CCDA89-AB73-4F05-A900-668160227B78-32-33024x85248-1032x2664.png	2664	323.121	630.355	581.07	1789.06	557.055	1765.05	568.572	1776.51	2.08887	424.904	0.776944	19.2963	0.984638	0.54813	0.520211	28.3454	28.7326	6.29969	2.54334	2.27471	16.708	15.8678	-0.433802	89.2572	0.78502	0.483143	0.0574604	0.142293	0.0661145	0.0325716	0.0239144	0.0210811	0.0318116	0.0271417	0.0153799	0.016788	0.0131316	0.0115532	0.0122015	0.0146457	0.015254	0.00926104	0.00986944	0.00974318	0.00851054	0.00785351	0.0084606	0.00851256
TCGA-A8-A09D-01Z-00-DX1.66312A8A-88BA-4B58-96DF-1A7AC39F9E4A-32-48896x46336-1528x1448.png	1448	332.294	650.99	754.39	734.868	729.991	710.67	741.657	722.242	2.04965	435.667	0.77298	19.5646	0.990103	0.547836	0.5298	28.496	28.8879	6.41713	2.58939	2.31916	17.0186	16.1658	-5.7311	89.7745	0.790209	0.490722	0.0582103	0.143241	0.066258	0.0329672	0.0242519	0.0204034	0.030903	0.0270274	0.0152379	0.017274	0.013012	0.0116451	0.0122233	0.0144854	0.0154966	0.00921846	0.00983299	0.0100908	0.00859519	0.00771324	0.00839947	0.00812524
TCGA-A8-A09E-01Z-00-DX1.239A8E03-49EA-4C29-AF86-FC1BD8A9DB20-32-31488x30976-984x968.png	968	340.12	645.688	496.586	504.263	472.389	480.165	484.043	491.752	1.92855	437.393	0.748234	19.8275	0.990798	0.565693	0.559881	27.7424	28.268	6.74356	2.70087	2.41338	17.5375	16.7522	0.179662	88.0681	0.803712	0.518723	0.0602238	0.147491	0.0657038	0.0312404	0.0251091	0.0195308	0.0297236	0.0271	0.0147646	0.0168666	0.0132847	0.0112503	0.0122214	0.014155	0.0153809	0.00933159	0.00974767	0.00983189	0.00832674	0.00787376	0.00865923	0.00805203
TCGA-A8-A09I-01Z-00-DX1.B738E479-8766-4766-B012-B32AC2F27533-32-78336x45824-2448x1432.png	1432	305.681	621.551	1101.15	844.538	1078.51	819.602	1089.33	831.595	2.27464	412.858	0.787279	18.6134	0.991085	0.519552	0.493491	28.2863	28.5294	5.93908	2.41471	2.14175	16.2612	15.416	2.37142	88.6769	0.757521	0.456674	0.0553651	0.133789	0.0645277	0.0330467	0.023428	0.022099	0.0311033	0.0274747	0.0158181	0.0172014	0.012964	0.0119075	0.0127782	0.014837	0.0155659	0.00959836	0.0102221	0.0101835	0.00832323	0.00806838	0.00898636	0.00878282
TCGA-A8-A09K-01Z-00-DX1.41B2DF5F-C0E1-43BB-BAA5-2946A9EC4650-32-81408x49408-2544x1544.png	1544	345.922	695.275	1517.28	770.713	1492.42	745.64	1504.33	757.646	2.27963	466.453	0.778878	19.7953	0.98731	0.532883	0.484071	29.3973	29.7727	6.30024	2.51948	2.24897	17.4293	16.4608	0.486	95.7697	0.766343	0.472209	0.0568677	0.139086	0.0651043	0.0329483	0.0239124	0.020814	0.0317679	0.0271281	0.015706	0.0172845	0.0132169	0.0112701	0.0125842	0.0149738	0.0154476	0.00941812	0.00996628	0.010164	0.00857271	0.00776224	0.00851083	0.00860857
TCGA-A8-A09M-01Z-00-DX1.E2CEA8B5-C86D-4873-BE67-359FBEECCA09-32-55040x103680-1720x3240.png	3240	317.712	600.589	1059.02	1040.72	1035	1017.75	1046.54	1028.73	1.96555	411.077	0.763719	19.2171	0.990333	0.560066	0.545883	27.3972	27.7547	6.39077	2.58803	2.31519	16.8172	16.0271	-0.517566	86.1141	0.796416	0.505485	0.0587783	0.145016	0.0669114	0.0321726	0.0247152	0.0198488	0.0307549	0.0280209	0.0151679	0.0169995	0.0135128	0.0113804	0.012077	0.0146779	0.0154877	0.00912375	0.00959029	0.0100447	0.00879494	0.00778901	0.00851681	0.00830123
TCGA-A8-A09N-01Z-00-DX1.A0E4EF10-5BFF-46A0-94C7-578EA3A88599-32-74752x89856-2336x2808.png	2808	295.132	571.42	1575.95	2255.18	1551.99	2233.28	1563.52	2243.73	2.00426	384.929	0.778955	18.5052	0.993537	0.552184	0.539621	26.984	27.3585	6.10653	2.48831	2.23283	15.9341	15.184	3.62452	83.8878	0.793176	0.487704	0.0588999	0.143031	0.0673359	0.0325083	0.02369	0.0213508	0.0309521	0.0272434	0.0153003	0.01672	0.0130753	0.0114943	0.0123781	0.0144354	0.0155823	0.00939348	0.009974	0.0100017	0.00843462	0.00777599	0.00848615	0.00849428
TCGA-A8-A09Q-01Z-00-DX1.C7240AFB-5971-4577-812C-A255C249001A-32-36096x39168-1128x1224.png	1224	328.462	636.689	594.97	582.158	570.218	558.863	582.073	569.976	2.08408	432.088	0.766231	19.4052	0.99115	0.550594	0.521167	28.0313	28.4318	6.34422	2.55445	2.294	17.0486	16.1765	-2.13557	89.8064	0.785136	0.49595	0.0575941	0.143507	0.066721	0.0315923	0.0240883	0.0201763	0.0309366	0.0276608	0.0151301	0.0167946	0.0134047	0.0114347	0.0124297	0.014864	0.0155887	0.00915519	0.00973975	0.0105467	0.00869022	0.0074659	0.00853116	0.00871619
TCGA-A8-A09R-01Z-00-DX1.392580F3-0CE5-4EDB-91CF-814AAD0DB649-32-32000x65792-1000x2056.png	2056	356.931	695.034	499.85	1048.18	474.523	1023.4	486.651	1035.28	2.15614	473.175	0.769252	20.1807	0.988201	0.546048	0.506619	29.1301	29.6703	6.56673	2.61938	2.3356	17.8346	16.8791	-2.10507	95.0361	0.779041	0.488498	0.0570302	0.144184	0.0654847	0.0324558	0.0242722	0.0203139	0.0310863	0.0264822	0.0151753	0.0171889	0.0136141	0.0110831	0.0124765	0.0146939	0.01549	0.00927203	0.00982697	0.0100921	0.00847187	0.00769735	0.00843749	0.00842655
TCGA-A8-A09T-01Z-00-DX1.4183BBA4-AF11-4602-9EC2-35083C34A393-32-37120x32512-1160x1016.png	1016	327.269	652.501	617.35	509.15	592.653	485.314	604.491	496.743	2.0822	430.201	0.79066	19.3564	0.990099	0.541217	0.521971	28.834	29.1512	6.26484	2.53668	2.28413	16.4956	15.6683	3.67602	89.653	0.788005	0.476803	0.0551266	0.14102	0.0683369	0.0313463	0.0228453	0.0217907	0.0324995	0.0283247	0.0147552	0.016448	0.0125955	0.0115235	0.0127533	0.0151566	0.0156629	0.00923962	0.00979829	0.00996497	0.00837568	0.00762872	0.00860644	0.00849834
TCGA-A8-A09V-01Z-00-DX1.2D6731CA-5712-4EB8-8602-E53301BF4238-32-32000x45312-1000x1416.png	1416	302.051	582.694	512.961	687.625	491.238	663.237	501.579	674.985	2.00927	394.891	0.777027	18.62	0.99456	0.558448	0.541545	27.4441	27.7363	6.13018	2.49258	2.2402	15.9163	15.219	-2.84892	84.74	0.793592	0.488797	0.0577415	0.140982	0.0668542	0.0324611	0.0241723	0.0218909	0.031161	0.0277186	0.0153119	0.0169258	0.0131662	0.0114684	0.0122793	0.0146283	0.0158332	0.00934782	0.010174	0.0101791	0.00871855	0.00787921	0.00874602	0.00851501
TCGA-A8-A09W-01Z-00-DX1.BF33B0F9-5786-4682-B59E-DCBD33D7BB03-32-66560x40192-2080x1256.png	1256	342.774	668.37	695.969	616.765	670.775	592.708	682.857	604.239	2.12342	453.481	0.766706	19.8426	0.981172	0.546515	0.511289	28.6086	29.1797	6.47855	2.59419	2.3208	17.5322	16.6202	-3.31449	92.6698	0.780702	0.490281	0.0580322	0.143786	0.0651989	0.0323711	0.0238071	0.0202071	0.0315107	0.0272781	0.0147593	0.0170089	0.0132636	0.0117013	0.0125882	0.0144462	0.0153539	0.00907564	0.00996682	0.00998911	0.00835371	0.00766069	0.00844776	0.00836657
TCGA-A8-A09X-01Z-00-DX1.17B5BE28-944F-427B-8F90-44885C3EDD36-32-85504x121600-2672x3800.png	3800	326.539	628.659	2056.4	1482.05	2032.53	1458.34	2043.91	1469.73	2.06428	430.278	0.754978	19.33	0.994161	0.553355	0.524995	27.4673	27.9222	6.35643	2.55364	2.28766	17.2137	16.3537	-2.37807	89.1686	0.785686	0.50439	0.0586221	0.144149	0.0653049	0.0318919	0.025981	0.0200548	0.0306318	0.0277646	0.0146822	0.0176776	0.0136933	0.0112668	0.012206	0.0144063	0.0156106	0.00912982	0.0099702	0.0101624	0.00891617	0.00797031	0.008498	0.00869313
TCGA-AC-A23C-01Z-00-DX1.0E67C785-83D3-49AF-B600-FB5B909AE6ED-32-19920x26420-622x825.png	825	302.401	634.698	282.049	369.471	257.971	345.719	269.538	357.061	2.29335	411.631	0.783322	18.5853	0.984791	0.514913	0.487923	28.2616	28.6034	5.92222	2.39187	2.1269	16.2628	15.3064	6.0167	89.7076	0.757594	0.459736	0.0559797	0.135822	0.0638658	0.0330538	0.0231944	0.0218934	0.0310368	0.0276424	0.01577	0.0172186	0.0130253	0.011707	0.0135267	0.0146985	0.0153507	0.00941415	0.0105814	0.0100154	0.00850221	0.0082316	0.00890162	0.00887928
TCGA-AC-A23E-01Z-00-DX1.F12A5A87-72CF-42F8-A6EC-8E7FAD80B1F7-32-43824x51986-1369x1624.png	1624	261.67	579.486	661.177	765.407	638.811	741.902	649.412	753.168	2.51604	366.652	0.802799	17.3008	0.998274	0.488529	0.454748	27.5443	27.621	5.34083	2.19673	1.9272	15.026	14.2792	-1.1336	86.49	0.734546	0.427126	0.0546904	0.126054	0.063406	0.0337259	0.0222593	0.0233846	0.0308774	0.0271825	0.0164169	0.0173922	0.012439	0.0120608	0.0134863	0.0147312	0.0162185	0.0100299	0.0106914	0.0101341	0.00805073	0.0082327	0.00882979	0.00903774
TCGA-AC-A23G-01Z-00-DX1.2F0326F7-6B77-4B3F-B4FA-59ADB785AA07-32-19920x18542-622x579.png	579	272.315	665.19	342.512	279.25	316.387	257.286	329.076	267.659	2.62497	390.012	0.804095	17.5397	0.994048	0.471305	0.448609	28.8171	29.1174	5.41308	2.20183	1.90649	15.1742	14.382	7.27439	89.9006	0.72649	0.423316	0.0577618	0.120086	0.0607987	0.0353057	0.0223318	0.0221539	0.0302359	0.0249749	0.0175283	0.0165073	0.0127412	0.0120961	0.0133789	0.0141771	0.0154343	0.00977644	0.0108485	0.00999335	0.00839921	0.00877157	0.00849421	0.008821
TCGA-AC-A2B8-01Z-00-DX1.14F3A9B2-1382-436A-B53C-92FC8495AD48-32-67592x53300-2112x1665.png	1665	337.021	688.341	1013.1	945.029	989.551	918.592	1000.82	931.334	2.2535	454.061	0.786725	19.625	0.991474	0.527145	0.490565	29.6257	30.0451	6.28471	2.51977	2.24714	17.072	16.1298	-2.88456	94.0774	0.766057	0.46305	0.0561442	0.137776	0.0645789	0.0333392	0.0229466	0.0214126	0.031591	0.0271341	0.0156639	0.0169383	0.0127388	0.011405	0.0127714	0.0149114	0.0154018	0.00948399	0.00978674	0.0100254	0.00824884	0.00796505	0.00845331	0.00865264
TCGA-AC-A2BK-01Z-00-DX1.A3A1F275-9CDC-48BA-BB81-BCA6F02ACA94-32-63310x30341-1978x948.png	948	298.345	631.584	860.671	421.283	835.953	398.208	847.817	409.228	2.53078	415.629	0.783148	18.4208	0.990331	0.504565	0.454133	28.1449	28.4905	5.74046	2.31522	2.0417	16.4095	15.5182	-1.91282	92.7286	0.738545	0.449043	0.0562024	0.131406	0.0625143	0.0330207	0.0233511	0.0216396	0.0305359	0.0263351	0.0158167	0.0175968	0.0131984	0.0117616	0.01327	0.0147525	0.0154486	0.00969565	0.0104164	0.0104507	0.00864525	0.00813547	0.00883636	0.00886806
TCGA-AC-A2BM-01Z-00-DX1.162A9FA9-6E61-48BF-B0A5-C6C7640ABD9B-32-88250x54887-2757x1715.png	1715	349.742	717.08	1266.31	819.463	1241.31	793.736	1253.3	806.117	2.30736	475.937	0.774251	19.9353	0.984598	0.521478	0.480268	29.5955	29.9838	6.34575	2.53276	2.24916	17.8003	16.7343	-2.93802	96.6969	0.758442	0.471722	0.0569746	0.13771	0.064191	0.0331514	0.024086	0.0202282	0.0310345	0.0267478	0.0156296	0.0173792	0.0133313	0.0115057	0.0123973	0.0150574	0.0153559	0.00942052	0.010097	0.0102249	0.00863122	0.00770068	0.00844956	0.00858596
TCGA-AC-A2FB-01Z-00-DX1.A4D93E32-BBD7-45E4-8ACF-3724B059ECBC-32-63310x26793-1978x837.png	837	276.782	591.198	863.953	396.32	840.857	373.077	851.883	384.197	2.59388	391.215	0.786031	17.7455	0.994167	0.495803	0.441953	27.2995	27.5832	5.47722	2.22305	1.93055	15.8937	15.0479	-8.88535	90.4274	0.728466	0.440016	0.0558233	0.128803	0.0626027	0.0339003	0.0242198	0.0225619	0.0307284	0.0266677	0.0163259	0.0178452	0.0130926	0.0119267	0.013251	0.0143183	0.0155374	0.00973918	0.0105061	0.0103781	0.00859028	0.0082688	0.00882231	0.00911639
TCGA-AC-A2FE-01Z-00-DX1.C036AE58-3C0D-4DBF-B658-296D03FD6701-32-47808x37716-1494x1178.png	1178	267.917	592.716	1007.01	663.787	982.826	641.549	994.352	652.128	2.54709	380.623	0.818633	17.3248	0.991119	0.484534	0.4476	28.5965	28.4749	5.26476	2.16911	1.90751	14.7964	14.0391	1.67181	87.6231	0.726787	0.405061	0.0544869	0.117502	0.0627522	0.034951	0.022311	0.0242561	0.0307965	0.0266629	0.017516	0.0178526	0.0120241	0.0121496	0.0135516	0.0147774	0.0159018	0.0100385	0.0108447	0.00994419	0.00782787	0.0089736	0.00883169	0.00924505
TCGA-AC-A2FF-01Z-00-DX1.012DAC86-E05C-44FA-81C2-FE4C754F409C-32-95924x68649-2997x2145.png	2145	299.264	634.937	1946.49	998.626	1923.39	973.895	1934.46	985.759	2.39011	411.962	0.790596	18.4349	0.988498	0.507059	0.474191	28.4553	28.7169	5.79531	2.34743	2.07673	16.0805	15.2054	9.6999	90.534	0.75001	0.448943	0.0555332	0.131871	0.0637859	0.0333138	0.0227946	0.0220925	0.0310627	0.0269872	0.0159251	0.0170319	0.0129166	0.0120285	0.0131555	0.0149669	0.0157368	0.00983133	0.0102366	0.0102073	0.00841321	0.00818467	0.00878776	0.0088539
TCGA-AC-A2FG-01Z-00-DX1.0F13DE40-9F7A-42C6-AB3D-02E8521B690A-32-39329x28371-1229x886.png	886	301.658	639.211	726.197	421.468	703.182	396.597	714.14	408.568	2.46316	416.801	0.791582	18.4367	0.990893	0.50326	0.458792	28.3342	28.581	5.74602	2.32101	2.05349	16.2493	15.3837	-1.98661	92.0238	0.744574	0.44575	0.0581454	0.128922	0.063939	0.033735	0.0231139	0.0216063	0.0309763	0.0266717	0.0165089	0.0166798	0.0134505	0.0114774	0.0135525	0.0147253	0.0159884	0.0101145	0.0101734	0.0107014	0.00853484	0.00794866	0.00933467	0.00917392
TCGA-AC-A2FK-01Z-00-DX1.033F3C27-9860-4EF3-9330-37DE5EC45724-32-28777x31328-899x979.png	979	306.659	631.882	473.426	405.535	449.321	381.818	460.895	393.161	2.36349	420.016	0.775652	18.7224	0.988166	0.514658	0.474632	27.8765	28.2603	5.93451	2.39237	2.1185	16.7327	15.8014	-4.18257	91.4248	0.751229	0.464596	0.0568123	0.135925	0.0643244	0.0330662	0.0247535	0.0204845	0.0315553	0.0262207	0.016055	0.0178035	0.0131574	0.0113038	0.012726	0.0142281	0.015378	0.00947281	0.0102351	0.0100894	0.00849912	0.0079385	0.00846367	0.00865594
TCGA-AC-A2FM-01Z-00-DX1.5D2309D5-C47B-4B04-B7B8-2F0685842889-32-53717x37361-1678x1167.png	1167	314.769	640.293	916.574	606.445	892.655	582.413	904.125	593.924	2.30394	429.61	0.763566	18.9441	0.988524	0.523735	0.485334	27.6761	28.0934	6.04796	2.43238	2.1571	17.0936	16.147	-4.79683	91.7761	0.756939	0.48189	0.0575016	0.137948	0.0643455	0.0327478	0.0249729	0.0203128	0.0304136	0.027176	0.015693	0.0175772	0.0137209	0.0112597	0.0127298	0.0149643	0.0151535	0.00943358	0.0100309	0.0104045	0.00893077	0.00796192	0.00880047	0.00872613
TCGA-AC-A2FO-01Z-00-DX1.46929316-D7ED-4D69-B068-409BFFBCEC4D-32-27818x31316-869x978.png	978	330.974	687.642	365.204	674.634	338.825	651.048	351.498	662.373	2.35022	452.318	0.785931	19.4511	0.983444	0.514184	0.471163	29.654	29.9581	6.06974	2.45104	2.18	17.1279	16.0894	-8.20515	95.0776	0.755234	0.455116	0.0542065	0.134721	0.0638828	0.0331892	0.0230986	0.0216823	0.0320752	0.0270703	0.0162468	0.0169807	0.0121661	0.0114906	0.0130655	0.0148388	0.0157486	0.00966306	0.00989873	0.0100538	0.00825916	0.00757619	0.00857529	0.00882231
TCGA-AC-A2QH-01Z-00-DX1.00B8BFFF-F1E2-4F99-A969-8DD7EE4F8E0B-32-75208x38098-2350x1190.png	1190	251.84	551.419	1159.98	610.763	1136.75	589.173	1147.86	599.462	2.86644	367.225	0.786878	16.9302	0.993798	0.479992	0.408299	26.3668	26.5629	5.06221	2.06844	1.78142	15.5156	14.6769	1.16972	90.4221	0.701557	0.428596	0.0563276	0.122537	0.0612066	0.0349829	0.0233571	0.0215856	0.0295508	0.0264394	0.0166449	0.0171778	0.0133065	0.0120015	0.0135783	0.014546	0.0157289	0.0104338	0.010599	0.0105275	0.00882482	0.00881463	0.00910887	0.00932283
TCGA-AC-A2QI-01Z-00-DX1.977549F4-D866-4465-85FB-5C916282A488-32-40936x50555-1279x1579.png	1579	333.055	666.155	682.344	809.985	658.039	785.146	669.674	797.11	2.16665	444.092	0.775464	19.5216	0.990934	0.535498	0.505618	28.7955	29.3015	6.33162	2.54277	2.26575	17.0472	16.1613	-3.29871	91.9089	0.775737	0.475802	0.0564495	0.141397	0.0641542	0.032623	0.0238624	0.021195	0.0311764	0.0272918	0.0156001	0.017002	0.012885	0.0113006	0.0127422	0.0146948	0.0154766	0.00949742	0.00977899	0.0100778	0.0084213	0.00771105	0.00832046	0.00838096
TCGA-AC-A2QJ-01Z-00-DX1.48C303BB-5A23-4037-BD28-77629A8CD9DA-32-61880x58679-1933x1833.png	1833	275.211	592.175	874.664	911.429	851.433	888.45	862.498	899.463	2.71573	393.431	0.777712	17.6743	0.995495	0.492744	0.429397	27.0064	27.298	5.38023	2.18569	1.90958	16.1804	15.2897	-1.23628	91.9564	0.718048	0.443944	0.0572147	0.126587	0.0614621	0.0341837	0.0239067	0.0208203	0.0299015	0.0265644	0.01628	0.0175775	0.0136881	0.0119771	0.0134855	0.0149343	0.0156407	0.0102331	0.0106058	0.0103942	0.00876308	0.00859952	0.00912329	0.00924392
TCGA-AC-A3BB-01Z-00-DX1.CE889249-2A5E-44DA-B04E-746BE82CD805-32-36451x57504-1139x1797.png	1797	323.597	669.401	638.319	1101.76	614.515	1076.52	625.954	1088.72	2.31155	442.303	0.78354	19.1829	0.987256	0.518893	0.481252	28.825	29.2423	6.08057	2.44263	2.16942	16.9059	15.9764	-0.102505	93.418	0.758632	0.462133	0.05753	0.136307	0.0642345	0.0343369	0.0234494	0.0209646	0.0308774	0.0269428	0.0159271	0.0172439	0.0131976	0.0111082	0.0127854	0.0148347	0.0154049	0.00956993	0.010234	0.010199	0.00841791	0.00781197	0.00849308	0.00866178
TCGA-AC-A3EH-01Z-00-DX1.30160436-4DE9-4F99-87E2-214E3CA47289-32-45816x31473-1431x983.png	983	279.245	586.759	675.296	468.865	652.473	445.372	663.386	456.604	2.47501	388.929	0.796201	17.8529	0.992509	0.51131	0.464309	27.9409	28.0855	5.53133	2.25716	2.00331	15.5658	14.8029	-2.82846	89.1021	0.742286	0.440386	0.0545041	0.129658	0.0640581	0.0337135	0.0232673	0.0221054	0.0306821	0.0271686	0.0161567	0.017179	0.0129835	0.0123047	0.0131857	0.0149372	0.0158045	0.009935	0.0103358	0.0102335	0.00838718	0.00829006	0.00905375	0.0089141
TCGA-AC-A3HN-01Z-00-DX1.1AA71B9B-1B61-41A9-91CF-B7649DEC189E-32-73704x70894-2303x2215.png	2215	329.94	680.019	918.805	1050.48	893.855	1025.8	905.822	1037.61	2.21784	445.964	0.785796	19.3978	0.990408	0.518912	0.499645	29.3071	29.6938	6.24882	2.51184	2.23462	16.9231	16.019	-2.64061	92.0433	0.763818	0.460554	0.0570945	0.136329	0.0641039	0.03382	0.0229902	0.02155	0.0313279	0.0267654	0.0161273	0.0169899	0.0124833	0.0115802	0.0128851	0.0147502	0.0153999	0.00958985	0.00993649	0.0101643	0.00814475	0.00783661	0.00841433	0.00871712
TCGA-AC-A3OD-01Z-00-DX1.E19B311B-BAB1-4CE8-9421-B49D5BE4537E-32-37141x22583-1160x705.png	705	351.823	719.441	602.81	366.076	577.953	340.007	589.818	352.556	2.41561	482.658	0.775072	19.9476	0.988732	0.515178	0.464262	29.8378	30.2925	6.27646	2.50302	2.21062	17.9017	16.81	-3.18509	98.699	0.748535	0.46234	0.0567273	0.135196	0.0628392	0.0334093	0.0236288	0.0212886	0.0309597	0.0265428	0.0160329	0.0171676	0.0133959	0.0121247	0.0128011	0.0146711	0.0153534	0.0100087	0.0101253	0.0101317	0.00851806	0.00763826	0.00859936	0.00848004
TCGA-AC-A3QP-01Z-00-DX1.4B97E53E-1069-40C5-A062-C988663B37DD-32-45816x42965-1431x1342.png	1342	324.795	660.272	764.891	677.212	740.631	652.747	752.245	664.457	2.23709	441.144	0.778776	19.2493	0.986981	0.528534	0.492745	28.5409	28.9868	6.1552	2.47279	2.20627	17.08	16.1029	0.0820079	92.2818	0.764216	0.470981	0.0584107	0.13791	0.0648182	0.0338546	0.0240193	0.0210137	0.0313228	0.0271037	0.0159393	0.0171387	0.0131383	0.0114968	0.0126678	0.0147953	0.0153939	0.00955965	0.00999778	0.0102571	0.00865134	0.00779667	0.00861411	0.00858719
TCGA-AC-A3QQ-01Z-00-DX1.86463263-AB12-49FB-8967-D5FD1F7D221A-32-35492x30620-1109x956.png	956	335.778	674.485	564.297	481.668	539.831	456.503	551.593	468.601	2.19312	449.639	0.787212	19.6626	0.985413	0.536327	0.497442	29.3964	29.8174	6.3264	2.53745	2.26163	17.1351	16.1498	-0.707444	93.2016	0.773282	0.466403	0.0564594	0.14018	0.0658955	0.0332489	0.0236402	0.0210458	0.0323889	0.0266094	0.0157049	0.0176075	0.0125878	0.0109992	0.0124536	0.0142769	0.0153247	0.00932272	0.00976033	0.0102139	0.008158	0.00765251	0.0085425	0.00830699
TCGA-AC-A3TM-01Z-00-DX1.4421EE37-A2CC-4638-AC44-9C26CB09FDC1-32-100720x79590-3147x2487.png	2487	247.125	554.96	1661.09	1213.52	1638.57	1191.05	1649.35	1201.78	2.9244	365.25	0.793074	16.7759	0.994673	0.472497	0.403661	26.7281	26.8958	4.96209	2.03376	1.75468	15.2961	14.4688	2.14895	90.4857	0.69551	0.41557	0.0542179	0.120159	0.0607178	0.0340671	0.022916	0.0224442	0.0299619	0.0265331	0.0168429	0.017433	0.0131468	0.0121154	0.0138221	0.0146699	0.0155827	0.0102525	0.0106913	0.0105475	0.00865664	0.00869956	0.00930961	0.00939038
TCGA-AC-A3TN-01Z-00-DX1.F00E81C7-0CA2-49E8-A30F-DE423538E93C-32-50840x65234-1588x2038.png	2038	300.959	636.249	688.651	972.53	664.373	948.558	676.012	960.018	2.41742	416.695	0.797535	18.4839	0.989433	0.504089	0.470892	28.9421	29.1739	5.81811	2.35996	2.08886	16.107	15.2303	3.57497	90.7115	0.743729	0.438176	0.0554159	0.129453	0.0637333	0.0334561	0.0225638	0.0227489	0.0312839	0.0264802	0.0157988	0.0167793	0.0127201	0.0118962	0.0133783	0.0145879	0.0154583	0.00964669	0.0100838	0.0101554	0.00823202	0.00827911	0.00876069	0.00890528
TCGA-AC-A3W5-01Z-00-DX1.522F702C-776E-45F1-84D3-1648DF04137C-32-31872x13347-996x417.png	417	253.228	525.148	338.168	176.738	315.409	155.376	326.276	165.529	2.4716	353.02	0.770419	17.1286	1	0.508901	0.459104	26.0917	26.2922	5.35899	2.18866	1.91088	15.2684	14.6304	-4.09043	85.0297	0.738548	0.455451	0.0581012	0.126749	0.0637683	0.0347742	0.0238732	0.0207995	0.0304862	0.0273929	0.0165747	0.0176297	0.012694	0.0112855	0.0139726	0.015095	0.0157924	0.0103914	0.0105012	0.0103459	0.00846085	0.00871025	0.00883355	0.0101852
TCGA-AC-A3W7-01Z-00-DX1.189BB448-ECBA-4042-8A35-4B787271E8FE-32-37848x38658-1182x1208.png	1208	340.256	723.116	565.305	517.544	539.961	491.714	552.138	504.186	2.36487	475.127	0.799191	19.6894	0.984277	0.507872	0.472234	30.4719	30.7194	6.19882	2.48121	2.21184	17.4202	16.2064	2.79677	96.7071	0.746074	0.443173	0.0553408	0.133321	0.0648019	0.0333965	0.0227996	0.0223046	0.032326	0.0271695	0.0163513	0.0169767	0.0126053	0.0118308	0.012945	0.0149661	0.0152255	0.00905932	0.0102192	0.010042	0.00803684	0.0073166	0.00860602	0.00860808
TCGA-AC-A3YI-01Z-00-DX1.321C0A32-ABF9-48ED-8071-C6B1774E9F7B-32-53784x70894-1680x2215.png	2215	340.513	703.871	884.87	1099.16	861.111	1072.36	872.437	1085.23	2.34902	467.865	0.78779	19.6654	0.983853	0.516099	0.475587	30.0221	30.3101	6.21196	2.49047	2.2076	17.3387	16.275	-8.06365	96.0544	0.750609	0.456723	0.0552896	0.13402	0.0644085	0.0329486	0.0234391	0.021105	0.0318444	0.0263673	0.0157974	0.0173911	0.0128978	0.0114968	0.0128148	0.0150633	0.0153737	0.00966021	0.00990549	0.0101558	0.00834435	0.00785918	0.00864825	0.00868603
TCGA-AC-A3YJ-01Z-00-DX1.8E665F69-FD8C-419A-871F-3AEE2E5A3A60-32-47808x48717-1494x1522.png	1522	330.519	687.823	734.738	682.691	709.294	658.32	721.498	669.975	2.33887	452.421	0.794255	19.3536	0.992291	0.517536	0.480302	29.6951	30.0456	6.12699	2.46261	2.17914	16.8389	15.8867	-2.16716	94.4163	0.758356	0.450639	0.0572451	0.13419	0.0641475	0.0344286	0.0229267	0.0212488	0.0315052	0.0264574	0.0159763	0.0172846	0.0128568	0.0112562	0.0126662	0.0145651	0.0152485	0.00975043	0.0100584	0.0102014	0.00825307	0.00771158	0.00841062	0.00845765
TCGA-AC-A4ZE-01Z-00-DX1.A9BB4DBC-4314-4A77-AA1C-0882DBC370F1-32-25899x27755-809x867.png	867	321.454	695.58	451.193	414.361	426.764	389.095	438.474	401.163	2.39746	451.866	0.787487	19.0139	0.995465	0.49618	0.465338	29.2767	29.3838	5.92257	2.38678	2.10614	17.0327	15.9672	7.27998	94.1153	0.735005	0.447541	0.055143	0.130481	0.0649223	0.0343039	0.0246102	0.0223954	0.0315692	0.0272952	0.0165609	0.0182814	0.013162	0.0125689	0.0130108	0.0148187	0.0153393	0.00985404	0.0105346	0.0102805	0.00857472	0.00831377	0.00930251	0.00864601
TCGA-AC-A5EH-01Z-00-DX1.DF59B26B-379F-4047-B7AE-4493810D30A0-32-59473x55921-1858x1747.png	1747	273.337	581.556	879.489	944.913	856.361	922.18	867.411	933.019	2.44898	380.287	0.788962	17.6522	0.994421	0.502061	0.462547	27.0978	27.3668	5.5138	2.24566	1.97605	15.5709	14.7902	5.50135	87.7597	0.742404	0.445377	0.0564774	0.130142	0.063408	0.0340385	0.0234955	0.0225483	0.0305734	0.0273286	0.0161183	0.017375	0.0128383	0.0120235	0.0132718	0.014689	0.0157331	0.00994186	0.0103191	0.010149	0.00862515	0.00834301	0.00888321	0.00886295
TCGA-AC-A5XS-01Z-00-DX1.E5F2481E-9314-4B20-84B7-370EF82AF4BB-32-32614x26795-1019x837.png	837	275.945	587.21	520.475	427.279	496.545	404.966	507.979	415.586	2.59451	390.034	0.788067	17.7393	0.987749	0.494001	0.436783	27.2247	27.4754	5.46232	2.21549	1.95054	16.0157	15.1004	-5.766	90.4758	0.724432	0.441191	0.0567641	0.128256	0.0630127	0.0339697	0.0235041	0.0217486	0.0309241	0.0266641	0.0157923	0.017653	0.0133531	0.0121314	0.0135474	0.0146716	0.0152658	0.00995147	0.0101234	0.010498	0.00852481	0.00887626	0.00911316	0.00894586
TCGA-AC-A5XU-01Z-00-DX1.1AEEFAAF-0906-4086-8022-13B689FAB9F5-32-56595x63763-1768x1992.png	1992	335.31	681.232	839.303	878.994	814.508	854.28	826.433	866.108	2.30382	453.499	0.776959	19.4897	0.993031	0.521327	0.481381	28.7946	29.3512	6.2718	2.5044	2.2114	17.3354	16.342	0.627211	94.1874	0.759455	0.46681	0.0571535	0.138111	0.0638206	0.0332687	0.023952	0.0218056	0.0306676	0.0266873	0.015609	0.0170908	0.0131223	0.011537	0.0124921	0.0146302	0.0152372	0.00956861	0.00983737	0.0102672	0.00836647	0.00782132	0.00859747	0.00865646
TCGA-AC-A62X-01Z-00-DX1.36FDC9AA-4EBE-40E6-92C2-8471049171A4-32-44125x70251-1378x2195.png	2195	336.291	673.173	799.945	1218.88	775.594	1193.98	787.298	1205.94	2.29193	453.44	0.773423	19.5319	0.990722	0.52987	0.485894	28.7218	29.2064	6.27553	2.5103	2.22621	17.3661	16.4532	-0.695427	94.2434	0.764257	0.473145	0.0585336	0.138028	0.0643643	0.0340003	0.0241428	0.020735	0.0308736	0.0264791	0.0158802	0.0170851	0.0132869	0.011693	0.0122492	0.0144756	0.0154366	0.00956233	0.00998073	0.010276	0.00841971	0.00781961	0.00861408	0.00858517
TCGA-AC-A62Y-01Z-00-DX1.5075F4DA-488C-40AD-BD73-6DE8953E1864-32-33573x36181-1049x1130.png	1130	266.216	556.351	582.177	591.9	560.674	568.313	570.89	579.531	2.34831	365.075	0.786604	17.3873	0.991525	0.507313	0.481388	26.8031	27.0806	5.50148	2.25677	1.99829	15.1886	14.4587	3.53452	84.2606	0.749187	0.445202	0.056679	0.129311	0.0624845	0.0332384	0.0237108	0.0227727	0.0301097	0.0272893	0.0157717	0.0171883	0.0128791	0.0122701	0.0130959	0.0147393	0.0157745	0.00993994	0.0103782	0.010189	0.00837507	0.00833245	0.0086473	0.0090852
TCGA-AC-A6IV-01Z-00-DX1.DA4F4B9F-9070-4B3A-996F-311E0A989FFB-32-17266x27936-539x873.png	873	306.99	636.036	270.832	438.218	248.036	413.454	258.858	425.284	2.56879	425.18	0.773041	18.5355	0.98731	0.509784	0.446951	27.6295	28.2255	5.79321	2.3227	2.04669	16.7899	15.8524	4.70888	94.1654	0.737239	0.45411	0.0570733	0.133342	0.0619447	0.0346838	0.0242902	0.0219458	0.0292474	0.0266216	0.0157601	0.0178214	0.0137874	0.0113679	0.0128389	0.0153842	0.0162715	0.00941021	0.0104369	0.0101358	0.0083331	0.00785134	0.00892177	0.00932219
TCGA-AC-A6IW-01Z-00-DX1.C4514189-E64F-4603-8970-230FA2BB77FC-32-28777x34620-899x1081.png	1081	347.262	693.265	444.511	517.676	419.094	493.319	431.317	505.004	2.20071	467.006	0.761248	19.8956	0.987248	0.540485	0.501854	28.8706	29.2387	6.41965	2.56517	2.27756	17.818	16.8211	-1.52736	94.6891	0.77181	0.493195	0.0590786	0.139566	0.0649598	0.032758	0.0252727	0.0199166	0.0307124	0.0273961	0.0154917	0.0177671	0.013666	0.0114945	0.0124325	0.0148892	0.0158023	0.00911926	0.00987887	0.0101437	0.00880073	0.00796016	0.00859105	0.00839214
TCGA-AC-A6IX-01Z-00-DX1.45B63C4F-9DC3-4CED-9DF9-0F86E647BEA3-32-37410x58023-1169x1813.png	1813	333.995	690.878	732.983	960.883	708.592	935.563	720.302	947.675	2.27527	451.097	0.785686	19.4328	0.986654	0.519056	0.488894	29.3498	29.7215	6.18479	2.48832	2.21738	17.0172	16.0701	6.75596	93.5379	0.762735	0.46267	0.056867	0.136046	0.0648467	0.032844	0.0235391	0.0214445	0.0311711	0.0261931	0.0155399	0.0172179	0.0128424	0.0116916	0.0127036	0.0145216	0.0154758	0.00943508	0.0100056	0.00986695	0.00830183	0.00820659	0.00870704	0.00885473
TCGA-AC-A6NO-01Z-00-DX1.61B7F48C-6D6E-4C1B-B236-DD130ECBDA9D-32-57554x39171-1798x1224.png	1224	304.292	609.454	952.172	663.206	929.896	638.41	940.449	650.393	2.14312	406.036	0.787822	18.6042	0.988235	0.532578	0.520533	27.9784	28.143	6.03217	2.45465	2.1875	16.0782	15.276	-0.534628	86.7821	0.774139	0.472306	0.0581372	0.136289	0.0663619	0.0329206	0.0235891	0.0206298	0.0304998	0.0272283	0.0155786	0.0168104	0.0130304	0.0121568	0.0128931	0.0147395	0.0156268	0.00936518	0.00961705	0.00988666	0.00848745	0.00810302	0.00892168	0.00862213
TCGA-AC-A7VB-01Z-00-DX1.62D7FDB3-280D-43B2-92EA-AB810384B0B7-32-42206x50965-1318x1592.png	1592	343.113	748.945	467.683	775.573	442.131	749.293	454.325	761.913	2.45476	479.038	0.805415	19.6308	0.985417	0.491925	0.459412	31.1737	31.3848	6.1206	2.45386	2.16889	17.0767	15.9574	-0.633193	97.6673	0.737569	0.429362	0.0543366	0.128882	0.0630339	0.0332137	0.0223016	0.0227145	0.0318614	0.0263294	0.0156823	0.016997	0.0122923	0.0117437	0.0130487	0.015243	0.015207	0.00952172	0.00987917	0.00988383	0.00778133	0.00826062	0.00873536	0.00918489
TCGA-AC-A7VC-01Z-00-DX1.EB247544-EADE-419C-B7A7-BB9CC978336F-32-45084x46674-1408x1458.png	1458	256.167	576.103	666.207	627.413	643.631	604.276	654.452	615.326	2.93339	379.439	0.788833	17.0442	0.994597	0.47318	0.401366	27.134	27.3282	5.04943	2.05667	1.77769	15.5466	14.7072	-3.48004	92.3867	0.696286	0.417632	0.0543	0.120698	0.0595541	0.0337601	0.0231906	0.0227526	0.0299711	0.0265859	0.0166925	0.0172526	0.013232	0.0120696	0.0138539	0.0150801	0.0154913	0.0101882	0.01076	0.0107278	0.00886856	0.00869149	0.00915278	0.00945565
TCGA-AC-A8OP-01Z-00-DX1.A2AF501D-7DCD-4BE7-93A4-EBCAF0C0D54E-32-43166x53252-1348x1664.png	1664	295.791	623.457	948.361	883.548	924.464	859.928	935.979	871.308	2.30918	409.79	0.791622	18.3729	0.986334	0.510388	0.482905	28.2418	28.4354	5.78751	2.3595	2.09803	16.1405	15.2153	2.00232	88.9798	0.749135	0.451824	0.0562312	0.131645	0.0646433	0.033919	0.0233662	0.0217505	0.0317917	0.027034	0.015933	0.0172695	0.0129985	0.0122677	0.012917	0.0147013	0.0153896	0.00958964	0.0101815	0.0100008	0.00831122	0.0078336	0.00853182	0.00873488
TCGA-AC-A8OQ-01Z-00-DX1.15946A44-711C-4765-AB46-5CFB7BD11E42-32-56595x57673-1768x1802.png	1802	327.991	650.14	1027.78	893.067	1003.53	868.96	1015.16	880.526	2.15288	438.055	0.766834	19.3557	0.986082	0.537425	0.510084	28.0332	28.4415	6.3003	2.52968	2.25183	17.1906	16.2615	2.76181	90.9179	0.774119	0.491822	0.05821	0.141837	0.0659933	0.0323439	0.024603	0.0198647	0.0306743	0.0271369	0.0149288	0.0173478	0.0134145	0.0114967	0.0124011	0.0146697	0.0150433	0.00937185	0.00994505	0.0103612	0.00875016	0.00761699	0.00852634	0.0086211
TCGA-AC-A8OR-01Z-00-DX1.C9A35592-1E73-40D4-834A-46E3471D84A3-32-22062x31527-689x985.png	985	243.425	517.007	374.932	521.995	353.028	500.56	363.49	510.808	2.32846	340.42	0.780566	16.7399	0.996441	0.508102	0.492825	25.5689	25.6228	5.29175	2.18854	1.93147	14.9294	14.2433	-0.13915	81.2061	0.7479	0.459985	0.0587493	0.125864	0.0647038	0.0345775	0.0253415	0.0226061	0.0288455	0.0282295	0.0167195	0.017681	0.012901	0.0124215	0.0132597	0.0146472	0.016616	0.00993145	0.0103408	0.00999934	0.00823216	0.0087483	0.00922506	0.00951851
TCGA-AC-A8OS-01Z-00-DX1.3FD44846-8BD2-4A7A-9A87-8D3D29C25F60-32-46043x46426-1438x1450.png	1450	336.357	688.387	603.99	757.847	579.101	733.148	591.008	745.033	2.33181	461.373	0.775819	19.5025	0.985976	0.522552	0.477353	28.9413	29.3782	6.18358	2.47399	2.20066	17.4528	16.4199	4.0541	95.3333	0.755332	0.470574	0.0571635	0.137342	0.0641505	0.0337117	0.0242522	0.021006	0.0312095	0.0271137	0.0157992	0.0177768	0.0131366	0.0114302	0.0126364	0.0148111	0.0153476	0.00965767	0.0101955	0.0100687	0.00841811	0.00791999	0.00852555	0.00877065
TCGA-AN-A0AK-01Z-00-DX1.4B410152-8588-4000-870A-B31B21161015-32-145655x65430-4551x2044.png	2044	273.801	564.373	2307.78	1039.35	2285.2	1016.69	2296	1027.54	2.42385	379.945	0.776091	17.6891	0.993047	0.515617	0.470379	26.4858	26.7492	5.56281	2.26442	2.00505	15.8927	15.0653	0.364877	87.4769	0.743969	0.463245	0.0574394	0.132694	0.0642893	0.0335754	0.0245357	0.0209453	0.0303846	0.0270707	0.0162015	0.0176551	0.0136374	0.0117273	0.0128812	0.0146314	0.0155557	0.00985446	0.0104434	0.0104293	0.00887179	0.00824238	0.00892208	0.00895537
TCGA-AN-A0AM-01Z-00-DX1.169CE39A-DD54-46D8-8D03-60B69A473CDB-32-44743x50293-1398x1571.png	1571	309.493	630.238	740.63	770.229	715.968	747.07	727.783	758.19	2.33506	421.868	0.779577	18.7719	0.990133	0.520524	0.48014	28.04	28.4461	5.96608	2.40653	2.13579	16.641	15.7239	-0.11252	91.2772	0.755974	0.463165	0.0560206	0.13708	0.0643021	0.0327882	0.0238713	0.0212645	0.0312069	0.0270669	0.0156684	0.0172848	0.0132522	0.0116315	0.0128524	0.0147199	0.0154815	0.00956752	0.0099556	0.0102527	0.00848756	0.0078179	0.00850504	0.00882044
TCGA-AN-A0AS-01Z-00-DX1.51E551E9-E5F4-4C94-9B25-71DA41109E92-32-59023x43937-1844x1373.png	1373	274.849	563.286	957.169	547.952	934.326	525.622	945.286	536.212	2.34889	376.978	0.777441	17.7059	0.992267	0.516301	0.481852	26.4706	26.6695	5.60228	2.28765	2.02534	15.783	15.0043	3.85698	86.0487	0.749922	0.466239	0.0580105	0.132067	0.0651176	0.0332565	0.0243798	0.0211809	0.0308045	0.0274038	0.0160094	0.0177116	0.0138366	0.0117945	0.0129148	0.01476	0.0155751	0.00964575	0.0104713	0.0104957	0.00871548	0.00816566	0.00898464	0.00906882
TCGA-AN-A03Y-01Z-00-DX1.074C48E5-ED69-40AE-8709-444898122BF4-32-119520x37605-3735x1175.png	1175	241.914	498.096	2024.93	677.805	2001.23	658.324	2012.6	667.604	2.46743	336.773	0.792244	16.7204	0.996845	0.51168	0.458075	25.9458	26.0305	5.15626	2.13897	1.88778	14.6549	13.9772	2.88165	83.0622	0.736618	0.440657	0.0558594	0.128286	0.0641386	0.0339555	0.0232348	0.0222454	0.0309484	0.0278662	0.0162699	0.0171999	0.0130824	0.0120195	0.0135781	0.015004	0.0158569	0.0101896	0.0105498	0.010484	0.00884141	0.00825259	0.00904415	0.00929881
TCGA-AN-A041-01Z-00-DX1.96D3628B-FB6E-4A41-A5E8-8896B0657F1C-32-59760x51796-1867x1618.png	1618	215.739	466.025	1016.12	777.392	994.973	756.907	1005	766.596	2.53011	307.606	0.798353	15.8251	0.997417	0.49225	0.45396	25.0266	24.9793	4.82001	2.02067	1.76892	13.9594	13.3218	-1.27291	79.7187	0.725996	0.429575	0.0555115	0.123206	0.0645052	0.0340844	0.0234104	0.0232221	0.0311159	0.028311	0.0165611	0.0174516	0.0132413	0.0122353	0.0139158	0.0149025	0.016412	0.0101431	0.011107	0.0104681	0.00874662	0.00883605	0.00953214	0.00939216
TCGA-AN-A046-01Z-00-DX1.C529B94F-AFE3-4701-BC98-5D6EDF7B82C0-32-103584x42719-3237x1334.png	1334	240.208	478.837	1704.17	722.901	1681.95	703.047	1692.56	712.452	2.19753	323.4	0.776023	16.6986	0.997145	0.531355	0.508958	24.83	24.9099	5.35513	2.22636	1.98486	14.6749	14.067	-0.547888	78.3312	0.762837	0.476116	0.0587187	0.133134	0.0661945	0.0335391	0.0249885	0.0213781	0.0298353	0.0283866	0.0159813	0.0174783	0.0137691	0.0122007	0.013005	0.0148394	0.0161772	0.00984719	0.0103519	0.0103324	0.00912678	0.00870066	0.00913952	0.00893513
TCGA-AN-A0AT-01Z-00-DX1.DFD68CD2-C25E-47BE-BC06-8CE3C657B9FD-32-142799x63621-4462x1988.png	1988	309.672	636.327	2317.04	849.058	2293.73	824.415	2304.9	836.218	2.36469	424.505	0.776455	18.7652	0.993316	0.517896	0.475558	28.0997	28.4884	5.97192	2.40163	2.12563	16.6956	15.7757	-0.44665	91.8552	0.75247	0.463626	0.0577637	0.135037	0.063574	0.0334615	0.0241194	0.0211889	0.0305579	0.026713	0.0158865	0.0173568	0.0132092	0.0117497	0.0127611	0.0146009	0.0153709	0.00959925	0.010245	0.0103058	0.00860213	0.00803644	0.0087446	0.00879853
TCGA-AN-A0FD-01Z-00-DX1.8970DBBA-7D43-4C2E-B14A-6D21F1EF3425-32-53784x52106-1680x1628.png	1628	183.257	405.065	787.894	908.21	769.058	887.897	778.037	897.517	2.55578	266.958	0.800535	14.7338	0.997713	0.484945	0.451457	23.7325	23.4491	4.43607	1.89519	1.6493	13.1061	12.5916	1.58931	74.4058	0.714281	0.424434	0.0574979	0.115456	0.0644202	0.0352033	0.0242627	0.023308	0.0300875	0.0283155	0.0177379	0.0176637	0.0140029	0.0129351	0.0142904	0.0150364	0.0166043	0.0108024	0.0111182	0.0107301	0.00902573	0.0090558	0.00984774	0.00961843
TCGA-AN-A0FF-01Z-00-DX1.A23982C3-E0EB-4DB2-84EE-26E0005E3F66-32-138991x59190-4343x1849.png	1849	245.503	538.357	2177.59	917.363	2155.34	895.167	2165.99	905.756	2.70712	353.91	0.793746	16.7642	0.993779	0.483678	0.429765	26.4758	26.6524	5.06325	2.0844	1.81422	15.0285	14.2742	-2.1749	87.0435	0.713378	0.42416	0.0562522	0.122376	0.0616332	0.0345854	0.0231249	0.0221763	0.03036	0.0269656	0.01689	0.0173306	0.013091	0.0120664	0.013973	0.014819	0.0158191	0.0103343	0.010724	0.0103639	0.00857276	0.00869117	0.0091024	0.00930684
TCGA-AN-A0FJ-01Z-00-DX1.97B60767-916E-4938-9D0B-E6C0FE1CB3FC-32-139943x51819-4373x1619.png	1619	338.229	689.935	2094.62	743.495	2070.98	717.226	2082.32	729.827	2.28024	458.959	0.78338	19.6296	0.991031	0.525371	0.487481	29.4456	29.7644	6.26108	2.51136	2.23623	17.3058	16.3262	2.57287	94.6913	0.763992	0.465101	0.0576988	0.136405	0.0649006	0.0339116	0.0237042	0.0211651	0.0316635	0.0267795	0.0157587	0.017024	0.0131622	0.0115079	0.012767	0.0146824	0.015279	0.00968299	0.00994413	0.0100733	0.00849777	0.00795285	0.00853932	0.00858897
TCGA-AN-A0FK-01Z-00-DX1.8966A1D5-CE3A-4B08-A1F6-E613BEB1ABD1-32-133279x68021-4164x2125.png	2125	247.846	530.663	2142.31	1061.89	2121.25	1038.82	2131.27	1049.84	2.62121	352.857	0.796359	16.8525	0.993983	0.497567	0.443813	26.4351	26.5138	5.10852	2.10775	1.85514	14.9395	14.2592	3.48969	86.4989	0.727528	0.432573	0.0563845	0.123533	0.0638323	0.0341581	0.0232182	0.0227114	0.0307041	0.0273484	0.0168023	0.0173417	0.0132012	0.0121935	0.0136705	0.0147817	0.0160082	0.0103797	0.0106512	0.0103919	0.00875542	0.00858561	0.00920039	0.00923822
TCGA-AN-A0FL-01Z-00-DX1.20A041C6-A306-4599-A7D1-65032A252AA9-32-122807x71603-3837x2237.png	2237	359.654	704.734	1914.45	1097.52	1888.69	1072.83	1901.06	1084.66	2.19348	478.437	0.766482	20.2573	0.987413	0.542334	0.497876	29.3148	29.8462	6.56372	2.61519	2.32493	18.0141	16.9912	1.68307	96.0694	0.775089	0.489082	0.0574783	0.142854	0.0648814	0.0324171	0.0242627	0.0200011	0.030934	0.0267936	0.0152109	0.017281	0.0134194	0.0112058	0.0121663	0.014575	0.0153659	0.00926692	0.00982433	0.0102725	0.00862456	0.00739789	0.00834479	0.008378
TCGA-AN-A0FN-01Z-00-DX1.CAA3C2D0-7E74-48E5-ACB7-487434C7AAD2-32-124711x62432-3897x1951.png	1951	307.754	617.574	1994.88	1022.73	1971.52	998.544	1982.73	1010.16	2.15618	411.232	0.777594	18.8513	0.992956	0.530671	0.507078	27.8715	28.2664	6.12059	2.47558	2.20597	16.5379	15.6374	3.80391	88.1602	0.770407	0.473652	0.0570763	0.139452	0.0651017	0.033002	0.0240953	0.0209826	0.031069	0.0272166	0.0158443	0.0171944	0.0131011	0.0114589	0.0125349	0.014679	0.0155041	0.00932097	0.00996356	0.01016	0.00856519	0.0076739	0.00861616	0.00863784
TCGA-AN-A0FS-01Z-00-DX1.104368C2-28DA-4E43-8B27-78336AD5ABC8-32-134231x50333-4194x1572.png	1572	289.145	625.692	2028.9	727.548	2004.98	703.95	2016.38	715.259	2.49051	411.549	0.793465	18.0757	0.989667	0.494946	0.459695	28.2786	28.4949	5.60121	2.27885	2.01222	16.1439	15.1943	3.73848	90.4917	0.728482	0.434598	0.0553198	0.126581	0.0627145	0.0339659	0.0234253	0.0219891	0.0306414	0.0267139	0.0167512	0.0178716	0.0129769	0.0120526	0.0134576	0.0147323	0.0155759	0.00993273	0.010638	0.0102824	0.00839073	0.00844329	0.00897017	0.00900019
TCGA-AN-A0FT-01Z-00-DX1.6F263AB3-FB1D-4056-AEC2-4F163017324F-32-124711x45396-3897x1418.png	1418	202.258	439.113	2019.5	706.786	1999.59	686.62	2009.03	696.215	2.574	288.274	0.802371	15.2035	0.995188	0.489518	0.446048	24.1735	23.9752	4.5943	1.94604	1.6916	13.3966	12.8963	3.75205	76.9501	0.720895	0.429478	0.0576408	0.116575	0.0658117	0.0350551	0.0237051	0.0222058	0.0298804	0.0287471	0.0176113	0.0173665	0.013346	0.0125757	0.0143159	0.0148701	0.0165361	0.0109641	0.0109998	0.0102889	0.00893148	0.0095107	0.00981372	0.00964982
TCGA-AN-A0FV-01Z-00-DX1.C0D02946-FCDA-472D-895D-7ACF5C96B264-32-73303x52486-2290x1640.png	1640	258.067	534.486	1185.77	855.568	1163.36	833.591	1174.06	844.099	2.30361	353.549	0.792497	17.2661	0.992284	0.516308	0.490438	26.5349	26.6556	5.46155	2.24797	2.00507	15.0039	14.2643	2.67566	83.1471	0.755537	0.453868	0.0569751	0.130806	0.0651643	0.0335888	0.023448	0.0221831	0.0307112	0.0274444	0.0163194	0.0171647	0.0128792	0.0118885	0.0131279	0.0146354	0.0160194	0.0097765	0.0103443	0.0103186	0.00848358	0.00832848	0.00886845	0.00898551
TCGA-AN-A0FW-01Z-00-DX1.5EEDFC71-6ABE-4189-8C45-2127403A8F04-32-64735x39690-2022x1240.png	1240	204.856	450.462	971.622	626.29	951.213	605.756	960.887	615.563	2.55745	294.762	0.803439	15.4524	0.996686	0.486818	0.448095	24.6675	24.6218	4.68081	1.97425	1.72935	13.6403	13.037	3.68427	78.2449	0.719631	0.423281	0.0570507	0.119895	0.0643601	0.034557	0.0234166	0.0230984	0.0306785	0.0280577	0.0170429	0.0172579	0.0132703	0.0127298	0.013965	0.014822	0.0164329	0.0103611	0.010812	0.0103378	0.00882149	0.0091547	0.00948957	0.00947956
TCGA-AN-A0FX-01Z-00-DX1.C9656600-F823-4044-972B-7059B39FC539-32-44743x55044-1398x1720.png	1720	220.919	488.089	755.466	834.311	733.855	813.463	744.188	823.374	2.63426	316.85	0.799577	15.9876	0.995654	0.483255	0.438817	25.4943	25.3798	4.81864	2.01313	1.76273	14.0794	13.4917	3.66842	82.1211	0.719264	0.427386	0.0558354	0.119619	0.0643011	0.0342875	0.0238152	0.022854	0.0301126	0.0274658	0.0169702	0.0176071	0.0133084	0.0124079	0.0140593	0.0144611	0.0162108	0.0104593	0.0108197	0.010543	0.00877445	0.00868968	0.00935699	0.00934644
TCGA-AN-A0FY-01Z-00-DX1.25F5E2A1-F92C-4FE1-BD90-0CDDE50DC066-32-47599x43746-1487x1367.png	1367	221.474	472.221	780.167	695.478	759.132	674.736	769.104	684.638	2.42873	311.06	0.794501	16.0119	0.997699	0.499315	0.468462	24.9263	24.9473	4.94992	2.06954	1.81996	14.0807	13.4874	1.70678	79.0536	0.735615	0.438344	0.0576606	0.123979	0.0644695	0.0346934	0.0240399	0.0226576	0.0304259	0.0277585	0.0168964	0.0176907	0.0136701	0.0122145	0.0137405	0.0147477	0.01634	0.0102505	0.0107098	0.0104033	0.00865073	0.00874705	0.00936474	0.00924669
TCGA-AN-A0FZ-01Z-00-DX1.9555AF11-3A0D-4FE3-AE91-09DA77B175CA-32-38079x44871-1189x1402.png	1402	207.707	428.831	616.229	669.254	597.426	648.088	606.33	658.164	2.2186	283.802	0.804297	15.5682	1	0.52361	0.514601	24.3822	24.1572	4.92244	2.08325	1.86287	13.1527	12.6952	0.0580935	73.7622	0.76469	0.452309	0.0574781	0.125188	0.0688447	0.0332755	0.0236088	0.0233627	0.0309418	0.0293755	0.0166281	0.016969	0.0129161	0.012693	0.0138312	0.0145323	0.0166619	0.0100412	0.0106405	0.010221	0.00840077	0.00872823	0.00952339	0.009188
TCGA-AN-A0G0-01Z-00-DX1.BE0BB5DF-DEDA-48D8-B5D8-2735C767F28F-32-55215x41144-1725x1285.png	1285	327.41	648.323	1067.98	639.396	1043.34	615.54	1055.16	626.997	2.18301	437.242	0.769409	19.3988	0.986763	0.539338	0.503361	28.2366	28.6489	6.275	2.52098	2.25229	17.1781	16.2483	3.54202	91.7212	0.77426	0.487902	0.0580717	0.14152	0.0655896	0.0325873	0.0241781	0.0194132	0.0309957	0.0268857	0.0155431	0.0171722	0.0134565	0.0116548	0.012342	0.0143653	0.0154378	0.00944888	0.00984583	0.0101643	0.0087965	0.00789813	0.00847541	0.00840178
TCGA-AN-A0XL-01Z-00-DX1.E90AA056-51DC-4A6B-96EB-A0B707496912-32-65736x46019-2054x1438.png	1438	286.142	609.656	1095.22	767.833	1069.7	746.311	1081.99	756.586	2.5115	398.662	0.804215	17.9911	0.993071	0.50343	0.456628	28.3758	28.5525	5.58348	2.26892	1.99934	15.5966	14.7896	0.280582	90.3421	0.740658	0.430223	0.0554464	0.1273	0.0636903	0.0340511	0.0221202	0.0226478	0.0307737	0.0274231	0.0167408	0.0169432	0.0123042	0.0123555	0.0132042	0.0148221	0.0158429	0.00993037	0.0103173	0.00987473	0.0080354	0.00819197	0.00882194	0.00895217
TCGA-AN-A0XN-01Z-00-DX1.A8EB9F62-236E-4C59-A206-DF0C7654AC30-32-57768x51149-1805x1598.png	1598	225.24	506.599	922.062	788.81	901.917	765.592	911.485	776.743	2.80156	329.378	0.806163	16.0787	0.997575	0.470469	0.413032	26.1551	26.2372	4.77519	1.98058	1.71368	14.2384	13.5589	1.80317	84.982	0.702236	0.406017	0.0530068	0.119282	0.0609617	0.0337983	0.0221572	0.0233736	0.0301301	0.026862	0.0168915	0.0173909	0.0127229	0.0126095	0.014178	0.01475	0.0160754	0.0106521	0.011075	0.0103432	0.00842191	0.00911778	0.00943255	0.00947899
TCGA-AN-A0XO-01Z-00-DX1.204E554E-B1A8-41AD-8E39-62484DF4E3CD-32-57768x50826-1805x1588.png	1588	307.257	631.157	952.259	866.176	927.24	843.219	939.246	854.208	2.2576	414.584	0.793792	18.766	0.992906	0.521139	0.491264	28.4728	28.8521	5.98167	2.42203	2.1588	16.2316	15.4001	3.23539	89.8074	0.765439	0.454816	0.0558879	0.136129	0.0651431	0.0334977	0.0228427	0.0224723	0.0314777	0.0275035	0.015711	0.0169214	0.0126259	0.0114651	0.0131589	0.0147549	0.0156211	0.00954848	0.00994001	0.0101736	0.00837527	0.00781925	0.00868551	0.0087096
TCGA-AN-A0XP-01Z-00-DX1.A4EE3970-5C1F-482E-9AED-F1E3C52A776F-32-59760x47454-1867x1482.png	1482	289.06	600.228	972.521	848.172	949.147	824.832	960.34	835.988	2.36741	397.761	0.791368	18.1971	0.989885	0.51762	0.479484	27.7303	28.0178	5.74091	2.33078	2.06539	15.9542	15.1077	2.17493	89.0639	0.753489	0.454003	0.0562879	0.133305	0.0649839	0.0335835	0.0231306	0.0221189	0.0312298	0.0270938	0.0159962	0.0169167	0.0128621	0.0116622	0.0132617	0.0147783	0.0155921	0.00974849	0.0102235	0.0100882	0.00846872	0.00802074	0.00886444	0.00878113
TCGA-AN-A0XS-01Z-00-DX1.B4D4B73E-2912-4B2E-B18A-FBC35F8160D3-32-69720x42329-2178x1322.png	1322	316.829	648.768	1144.62	609.874	1119.74	586.104	1131.69	597.462	2.25964	430.795	0.789562	19.0514	0.986049	0.525949	0.491034	29.0052	29.3721	6.05071	2.44123	2.17797	16.5347	15.6401	-0.1984	91.6719	0.763593	0.457216	0.0563504	0.135646	0.0646221	0.0335337	0.0234485	0.0220868	0.0314611	0.0270869	0.0160735	0.0173116	0.0128821	0.0118056	0.0128409	0.014704	0.0156742	0.00946868	0.0101841	0.0102167	0.00855676	0.00808396	0.00865217	0.00872289
TCGA-AN-A0XT-01Z-00-DX1.882AF4CE-62A1-4808-9B4B-780066E5E602-32-49800x44058-1556x1376.png	1376	317.515	671.859	938.622	697.739	913.699	673.397	925.666	685.022	2.40318	438.355	0.795002	19.0139	0.989922	0.510536	0.470443	29.3813	29.6881	5.94845	2.39713	2.13005	16.5758	15.6252	7.12028	93.994	0.75134	0.445657	0.0552605	0.132708	0.0641472	0.0334141	0.0228767	0.0225674	0.0317271	0.0269118	0.0158634	0.016862	0.0126466	0.0115642	0.0133743	0.0148847	0.0156592	0.00972681	0.00998758	0.0101235	0.00832822	0.00805599	0.00883466	0.00866461
TCGA-AN-A0XU-01Z-00-DX1.6B0DD0FF-A20D-4BA2-8D48-FC357BA5313F-32-67728x50202-2116x1568.png	1568	332.71	672.114	1335.74	800.506	1311.39	775.579	1323.04	787.542	2.3008	451.059	0.770083	19.4627	0.991986	0.526664	0.483828	28.7562	29.269	6.22525	2.49233	2.21221	17.3444	16.3931	1.21416	94.1925	0.761343	0.471729	0.0571313	0.138284	0.0633029	0.0333424	0.02407	0.0209391	0.0305764	0.0270326	0.0157686	0.017487	0.0132909	0.0115086	0.0125305	0.0146939	0.0154218	0.00934056	0.0101036	0.0102705	0.00883396	0.00783438	0.00859895	0.0085708
TCGA-AN-A0XW-01Z-00-DX1.811E11E7-FA67-46BB-9BC6-1FD0106B789D-32-35856x39367-1120x1230.png	1230	329.896	648.925	563.344	708.335	539.108	684.142	550.555	695.636	2.09792	428.877	0.777938	19.3061	0.990566	0.535716	0.526613	28.6257	28.8388	6.36344	2.56596	2.27682	16.6199	16.004	0.524198	88.7275	0.783851	0.478691	0.0590529	0.134619	0.065253	0.0341222	0.024309	0.0215459	0.0291707	0.0264501	0.0160978	0.0171463	0.0135935	0.0123097	0.0120063	0.0140625	0.0160534	0.0100965	0.0102209	0.0099492	0.00868801	0.0081556	0.0085075	0.0082927
TCGA-AO-A03L-01Z-00-DX1.DE6561A9-E6B8-4BF0-AAA8-F91C87A66037-32-55775x40767-1742x1273.png	1273	353.048	696.761	1066.03	700.051	1041.14	674.645	1053.11	686.863	2.17113	469.514	0.767935	20.1296	0.990174	0.539327	0.501779	29.2907	29.728	6.53763	2.61232	2.31962	17.8668	16.8326	0.360882	94.8198	0.77488	0.488111	0.0571524	0.142018	0.065282	0.0324546	0.0240572	0.0201061	0.0308647	0.0263566	0.015233	0.01712	0.0133146	0.0112538	0.0123812	0.0142156	0.0150743	0.00913535	0.00966071	0.0101062	0.00873042	0.00751494	0.00835685	0.00844261
TCGA-AO-A03M-01Z-00-DX1.9998A9A0-D0A6-48FC-80FB-AE597CB9E8AA-32-41831x42865-1307x1339.png	1339	341.85	698.462	649.344	672.255	623.765	647.672	636.018	659.495	2.26545	460.896	0.787063	19.7128	0.989381	0.529242	0.492439	29.7623	30.2551	6.30663	2.52667	2.24409	17.106	16.1424	-4.27365	94.9586	0.769196	0.461407	0.0554854	0.138686	0.0648292	0.0328134	0.0230838	0.0215567	0.0316892	0.0269532	0.0155415	0.0167998	0.0128337	0.0115325	0.0129385	0.014767	0.0152359	0.00944115	0.0098548	0.0100125	0.00816675	0.00778767	0.00843338	0.00860129
TCGA-AO-A03N-01Z-00-DX1.79A8816D-961F-4D79-90B4-341919297A90-32-63743x39704-1991x1240.png	1240	352.536	710.388	821.091	558.18	795.42	533.148	807.786	545.145	2.23724	473.953	0.781166	20.0767	0.990189	0.532481	0.492136	29.756	30.2794	6.44954	2.57368	2.2939	17.6401	16.6352	-0.863702	96.1071	0.770118	0.471206	0.0572815	0.139594	0.0649311	0.0334954	0.0225713	0.0211795	0.0312645	0.0270453	0.0157275	0.0169257	0.0126605	0.0114308	0.0125581	0.0148797	0.015258	0.00933838	0.00992557	0.0100515	0.00818028	0.00761672	0.00834869	0.00848952
TCGA-AO-A03O-01Z-00-DX1.054BBC89-69F4-4311-814D-E343472CD2C0-32-59759x31937-1867x998.png	998	317.319	648.59	867.437	496.875	842.953	472.931	854.688	484.387	2.30139	429.677	0.783597	19.0138	0.996682	0.524363	0.489981	28.6699	28.9763	6.11103	2.45825	2.17388	16.622	15.782	2.89296	91.6015	0.763734	0.462419	0.0575232	0.134679	0.0644402	0.0332096	0.0231606	0.0221019	0.0312691	0.0270989	0.0158716	0.0166054	0.0128769	0.0116059	0.0130991	0.0147619	0.0153673	0.00964518	0.0100753	0.0101358	0.00837775	0.00803795	0.00866951	0.00870373
TCGA-AO-A03P-01Z-00-DX1.D34DA321-D8E3-4D68-BCE2-4A8B72B3D0AE-32-41831x45512-1307x1422.png	1422	257.074	530.731	648.167	833.53	626.088	811.507	636.628	822.035	2.34632	353.349	0.789855	17.1824	0.992933	0.510814	0.478689	26.0246	26.2023	5.42044	2.22769	1.97129	15.1727	14.4096	-2.00813	83.5286	0.748269	0.454326	0.0578291	0.130786	0.0655858	0.0341914	0.0235859	0.022065	0.0306717	0.0276169	0.0159988	0.0172162	0.0131655	0.0120551	0.0132251	0.0148462	0.0159207	0.00999338	0.0100961	0.0103833	0.00871413	0.00852358	0.00886476	0.00906482
TCGA-AO-A03R-01Z-00-DX1.DC317201-7F22-4C4A-86A5-ED82C37757C8-32-47807x34036-1493x1063.png	1063	311.388	654.419	867.365	675.047	843.064	650.575	854.807	662.257	2.35441	427.581	0.794846	18.8228	0.993912	0.509109	0.479706	29.1242	29.3722	5.95603	2.4094	2.13507	16.3963	15.5564	-1.45985	91.6098	0.754676	0.4453	0.05657	0.132055	0.0634819	0.0339797	0.0224305	0.0223221	0.0308652	0.0266773	0.0164783	0.017178	0.0126937	0.0116273	0.0126567	0.0144924	0.0152063	0.00993502	0.0101164	0.0102165	0.00788054	0.00807321	0.00842895	0.00844431
TCGA-AO-A03T-01Z-00-DX1.8B75E203-6DC8-4AC9-A256-6FCB818DA0DD-32-41831x35326-1307x1103.png	1103	290.958	599.859	665.319	578.691	641.331	555.954	652.847	566.794	2.36045	396.247	0.778986	18.2278	0.990984	0.515841	0.48065	27.4793	27.8757	5.80186	2.351	2.07578	16.0956	15.3013	0.838595	88.6169	0.754314	0.459953	0.0562474	0.134016	0.0633019	0.033221	0.024093	0.0213804	0.0303446	0.0269253	0.0158569	0.017186	0.0130185	0.01179	0.0129354	0.0148399	0.0156166	0.00979967	0.0101949	0.0101236	0.00864294	0.00818221	0.00903322	0.00887348
TCGA-AO-A03U-01Z-00-DX1.AE2B55F3-8BA1-4546-82B7-4D2292BE1C78-32-59759x44513-1867x1391.png	1391	321.669	678.343	654.662	872.774	628.85	849.031	641.344	860.396	2.32459	440.241	0.795508	19.1243	0.993576	0.516397	0.486062	29.661	29.9902	6.09248	2.45391	2.17354	16.5655	15.6662	1.42687	92.7382	0.761182	0.44918	0.0544154	0.133695	0.06392	0.0329929	0.0225492	0.0217449	0.0306163	0.0268371	0.0158456	0.0166311	0.0126936	0.0117378	0.0126778	0.0145792	0.0154829	0.00941898	0.00983708	0.00986673	0.0079107	0.00768459	0.00869284	0.00844496
TCGA-AO-A03V-01Z-00-DX1.52EBCB72-0C65-4E67-B9BB-DA15494327DE-32-35855x34985-1120x1093.png	1093	228.264	496.977	624.982	547.686	603.748	526.146	613.833	536.439	2.51218	322.032	0.81128	16.2168	0.997183	0.493382	0.458237	25.8489	25.965	4.98379	2.07259	1.82465	14.0164	13.3749	-5.34526	81.6042	0.734738	0.422319	0.0563058	0.123585	0.0641687	0.0348203	0.0226031	0.022974	0.0308621	0.027735	0.0167425	0.0169681	0.0126156	0.0122591	0.013558	0.0144403	0.0162302	0.00992198	0.0108372	0.0100588	0.00849189	0.00873168	0.00958561	0.00910216
TCGA-AO-A0J2-01Z-00-DX1.7C9FEC7B-6040-4C58-9563-D10C0D7AC72E-32-39839x26294-1244x821.png	821	252.446	531.229	899.37	507.202	877.058	485.325	887.801	495.683	2.37581	346.599	0.802302	17.0213	0.998195	0.511755	0.484639	26.5141	26.6685	5.35237	2.20897	1.96171	14.6826	13.9827	-0.351783	83.1506	0.754246	0.442539	0.0563065	0.12784	0.0658133	0.033561	0.022972	0.0230783	0.0301669	0.0277575	0.0161405	0.0176405	0.0128898	0.0120913	0.0136611	0.0141407	0.0163541	0.0101101	0.0106143	0.0102566	0.0082821	0.00880037	0.00909308	0.0088631
TCGA-AO-A0J3-01Z-00-DX1.8F28BFC8-D37E-425F-A9E3-4C23F083237C-32-45815x44483-1431x1390.png	1390	322.811	656.74	521.07	748.695	497.267	723.832	508.685	735.786	2.28319	435.088	0.789068	19.1305	0.993322	0.521978	0.483378	28.7053	29.0759	6.08502	2.45715	2.18807	16.7366	15.7933	-1.25097	92.1349	0.761433	0.460315	0.0577945	0.136272	0.0646354	0.0342566	0.0230137	0.0217957	0.0312315	0.0269729	0.0159422	0.016929	0.0129233	0.0116238	0.0128407	0.0147044	0.0153446	0.00934847	0.00991724	0.0102621	0.00838237	0.00805199	0.00843178	0.00862944
TCGA-AO-A0J4-01Z-00-DX1.2EFC978E-8DF5-4254-9598-C0910B17C5C8-32-53783x32991-1680x1030.png	1030	273.318	572.896	788.649	584.777	765.156	562.45	776.379	573.144	2.42893	375.817	0.803115	17.699	0.998206	0.507519	0.470393	27.3949	27.5422	5.54654	2.27056	2.01121	15.31	14.5619	1.44457	87.3088	0.749047	0.442144	0.0566961	0.129194	0.0656435	0.0344829	0.0227191	0.0231095	0.0307815	0.0272025	0.0163173	0.0168175	0.0130394	0.0117203	0.0132782	0.0139524	0.0154699	0.00960578	0.0102443	0.0101776	0.00824986	0.00822307	0.00894506	0.00894804
TCGA-AO-A0J5-01Z-00-DX1.20C14D0C-1A74-4FE9-A5E6-BDDCB8DE7714-32-55775x45546-1742x1423.png	1423	326.28	659.175	715.522	731.644	692.431	705.849	703.462	718.241	2.20985	437.729	0.784038	19.2905	0.989405	0.533308	0.500988	28.9656	29.4502	6.21891	2.5011	2.23248	16.7641	15.896	1.04979	91.6831	0.7724	0.464864	0.0571463	0.138271	0.0643334	0.0336228	0.0232907	0.0210666	0.031198	0.0269697	0.0158346	0.016671	0.0127689	0.0114739	0.012627	0.0146288	0.0155227	0.00951859	0.00995454	0.0100823	0.00834389	0.0075634	0.00842358	0.00853606
TCGA-AO-A0J6-01Z-00-DX1.D0C003CE-E112-4375-953D-78404C9D62DA-32-61751x46383-1929x1449.png	1449	352.003	697.379	1233.24	658.876	1208.79	633.115	1220.51	645.507	2.18373	468.776	0.772408	20.0228	0.989179	0.538516	0.500943	29.4578	29.8845	6.49248	2.59003	2.30606	17.5606	16.6117	-0.119026	94.7598	0.775433	0.480897	0.0558767	0.141987	0.0651695	0.0318398	0.0241411	0.0200255	0.0313472	0.0269936	0.0153539	0.017135	0.0129719	0.0113988	0.0124479	0.0147666	0.0153009	0.00929557	0.00968301	0.0101109	0.00836045	0.00756112	0.00832898	0.00845982
TCGA-AO-A0J7-01Z-00-DX1.DBA7BA24-CEEF-4636-87BB-D12D8DF016A3-32-49799x35156-1556x1098.png	1098	348.156	705.745	755.76	490.424	730.388	465.195	742.544	477.335	2.2113	466.919	0.785332	19.9274	0.988743	0.5297	0.499792	30.0147	30.4198	6.39736	2.56581	2.28685	17.3236	16.3495	-4.2091	94.756	0.772669	0.465095	0.0563298	0.13905	0.0647019	0.032332	0.0225728	0.0223363	0.0315943	0.0270196	0.0153039	0.0171344	0.0124747	0.0117775	0.0129456	0.0147412	0.0154977	0.0093867	0.0100037	0.010106	0.00801016	0.00763005	0.00857208	0.00846396
TCGA-AO-A0J8-01Z-00-DX1.9BDD4BDE-2A07-4E0C-B146-87365CA9DE3A-32-51791x40789-1618x1274.png	1274	354.683	726.739	919.645	496.668	893.754	471.382	906.251	483.557	2.31105	480.905	0.783251	20.0385	0.991071	0.522894	0.481908	30.1791	30.6792	6.39544	2.55197	2.26603	17.617	16.5702	-1.71276	97.3565	0.762279	0.462815	0.0557166	0.138245	0.0637905	0.0327011	0.0226586	0.0213475	0.0314106	0.0266225	0.0156148	0.0170073	0.0127871	0.0115855	0.0127151	0.0149752	0.0151854	0.00949749	0.00981714	0.0101229	0.00814226	0.00762712	0.00826088	0.00861617
TCGA-AO-A0J9-01Z-00-DX1.E37C342B-9B6A-4BEE-B064-A82C3579CC66-32-55775x44164-1742x1380.png	1380	343.149	688.488	761.585	512.44	737.012	487.229	748.857	499.275	2.2279	460.397	0.780707	19.7217	0.990777	0.53221	0.493656	29.2829	29.7387	6.34379	2.54217	2.25809	17.2613	16.3074	-3.67966	94.1898	0.770214	0.470423	0.0569583	0.139606	0.064737	0.0335135	0.0236886	0.0213717	0.0309884	0.0271586	0.0152696	0.0171144	0.0131846	0.0119274	0.0124679	0.0148024	0.0156037	0.00957658	0.00974413	0.0100838	0.0082673	0.00780548	0.00851461	0.00854694
TCGA-AO-A0JA-01Z-00-DX1.E3DDBAAF-6FFA-40BE-83FF-942857CFED5D-32-49799x41687-1556x1302.png	1302	186.428	447.885	849.781	614.278	829.514	593.552	839.121	603.435	2.99016	285.145	0.811586	14.809	1	0.451662	0.392255	25.0747	24.703	4.20538	1.79718	1.53597	13.2478	12.7172	4.88014	80.9712	0.680236	0.391074	0.0555415	0.10569	0.061198	0.0365011	0.0231862	0.0229185	0.0286056	0.0273684	0.0179134	0.0178247	0.0131981	0.0130993	0.0143752	0.0146046	0.0165109	0.0110144	0.0115158	0.0106457	0.00863609	0.00953214	0.00974154	0.00977192
TCGA-AO-A0JB-01Z-00-DX1.250FE098-345B-4981-9236-0519E1C9058E-32-59759x38737-1867x1210.png	1210	359.502	720.365	956.351	589.888	930.348	565.073	942.846	577.042	2.22349	481.169	0.768905	20.2048	0.993947	0.535404	0.497659	29.6049	30.1462	6.54583	2.60563	2.31165	17.9	16.8753	0.431812	96.4744	0.772667	0.482457	0.0576173	0.141161	0.0642923	0.0324005	0.0244548	0.020581	0.0307188	0.0262903	0.0156384	0.0171641	0.0133325	0.0116253	0.0123266	0.0144921	0.0151714	0.00942725	0.00991724	0.0101821	0.00862316	0.00774517	0.00851793	0.00843516
TCGA-AO-A0JC-01Z-00-DX1.C8DD421B-9799-4FE7-9224-5EAC6ED1028E-32-59759x37971-1867x1186.png	1186	379.069	743.527	979.407	661.395	953.156	635.693	965.802	648.073	2.18397	500.778	0.763113	20.8691	0.986853	0.542837	0.49949	30.0458	30.6994	6.82058	2.70129	2.39863	18.5655	17.515	-1.21926	98.4772	0.778173	0.491024	0.0574953	0.146136	0.0642411	0.0316929	0.0235597	0.0195726	0.0308366	0.0264998	0.0147292	0.0169967	0.013219	0.0114538	0.012263	0.01472	0.0149819	0.00920933	0.00963619	0.0100659	0.00831822	0.00730967	0.00811616	0.00836771
TCGA-AO-A0JD-01Z-00-DX1.52E3DCE8-32E3-45C0-AB54-7FA0A2F3F722-32-49799x42564-1556x1330.png	1330	377.937	756.08	840.81	651.119	814.367	625.144	827.073	637.616	2.25596	505.672	0.77068	20.7706	0.987156	0.527082	0.487919	30.347	31.0461	6.72613	2.66488	2.35604	18.4786	17.3848	1.38038	99.4238	0.767338	0.476079	0.0569977	0.14166	0.0632677	0.0327196	0.023531	0.0213458	0.0308024	0.0259843	0.0150461	0.0167462	0.0132183	0.0117039	0.0123485	0.0144464	0.0150306	0.00945761	0.00966635	0.0101386	0.00853209	0.00754607	0.00833411	0.00834823
TCGA-AO-A0JE-01Z-00-DX1.82D33053-E305-47D8-9B02-B55511EBB06D-32-61751x39098-1929x1221.png	1221	339.881	687.912	890.1	646.913	866.419	620.737	877.767	633.348	2.22503	456.094	0.782125	19.644	0.988053	0.532796	0.499594	29.5668	29.9393	6.3354	2.5415	2.26343	17.1415	16.1974	-0.862972	93.4113	0.771977	0.468166	0.0563928	0.137822	0.0643464	0.0326182	0.023228	0.0208442	0.0307311	0.0267116	0.0153411	0.0169401	0.0126931	0.01158	0.0127108	0.0145264	0.0152886	0.00940502	0.00969257	0.00991393	0.00821115	0.00763782	0.00851078	0.00850089
TCGA-AO-A0JF-01Z-00-DX1.3277D13C-F257-4D4C-AB5C-BEBA2E1A63D8-32-57767x45275-1805x1414.png	1414	315.278	656.532	835.42	662.619	809.926	639.183	822.097	650.358	2.26024	426.456	0.796865	18.9722	0.99115	0.516907	0.492272	29.3476	29.6169	6.02279	2.44434	2.18154	16.2706	15.3687	5.57723	90.8922	0.765664	0.450844	0.0555636	0.133942	0.06476	0.0327369	0.022737	0.022173	0.0313186	0.0267498	0.0159541	0.0168282	0.0126564	0.0122082	0.0129803	0.0150239	0.0153453	0.00978325	0.00976404	0.00984943	0.00813708	0.00795756	0.00854966	0.00850162
TCGA-AO-A0JG-01Z-00-DX1.FA785D56-B4FF-4CC3-A631-5C748E8E0558-32-39839x27042-1244x845.png	845	177.123	369.221	583.154	431.23	564.828	412.252	573.564	421.273	2.32917	244.877	0.788934	14.4682	0.995839	0.5148	0.501309	22.5809	22.3426	4.56925	1.94995	1.713	12.487	12.1813	0.570964	69.6299	0.752659	0.455668	0.0577055	0.120452	0.066842	0.0334561	0.0254186	0.0230313	0.0294609	0.0292762	0.0167872	0.0171765	0.0138849	0.0134561	0.0136567	0.0144532	0.0170175	0.0103215	0.0106837	0.0101029	0.00864321	0.00968931	0.00991426	0.00979244
TCGA-AO-A0JI-01Z-00-DX1.4DCDA545-B7E3-49DF-AB10-963E84BEB105-32-35855x24057-1120x751.png	751	327.529	675.301	469.698	398.55	444.55	374.311	456.557	385.992	2.33853	446.181	0.782567	19.2508	0.976401	0.511959	0.473031	28.7745	29.3743	6.12737	2.45463	2.17001	17.0686	16.0916	6.15984	93.7688	0.753775	0.45693	0.0566348	0.137279	0.0623811	0.0348131	0.0237631	0.0209713	0.0303281	0.0269366	0.0162433	0.018007	0.0125385	0.0109878	0.0132738	0.014665	0.0152316	0.00945862	0.0101528	0.0100206	0.00849971	0.00816412	0.00889081	0.00882044
TCGA-AO-A0JJ-01Z-00-DX1.D5B636F5-1B47-4033-9938-9DC8CD48CEE9-32-55775x44667-1742x1395.png	1395	350.935	740.506	876.529	485.929	851.556	459.331	863.538	472.159	2.40508	483.281	0.799053	19.8362	0.989971	0.505185	0.467299	30.61	31.0377	6.25569	2.50127	2.20465	17.4173	16.3055	0.848904	97.9939	0.749428	0.440364	0.055061	0.133403	0.0638682	0.0330443	0.0213892	0.0221838	0.0316043	0.0264732	0.01547	0.0166455	0.0125734	0.0119504	0.013247	0.0149569	0.0153356	0.00959621	0.0100073	0.0100176	0.0080696	0.007788	0.00863902	0.00876509
TCGA-AO-A0JL-01Z-00-DX1.473CC200-221A-4777-B19E-ADC41D10FC94-32-63743x44485-1991x1390.png	1390	357.628	721.371	1031.04	589.461	1006.06	563.558	1018.05	575.94	2.24579	482.715	0.778206	20.1653	0.986774	0.533315	0.491635	29.8572	30.3435	6.4879	2.58155	2.2968	17.7976	16.751	0.175989	96.8411	0.768757	0.473629	0.0567513	0.139992	0.0650705	0.0331327	0.0237609	0.0212097	0.0310134	0.0266869	0.0155251	0.0173043	0.0129567	0.0115874	0.0124032	0.0145244	0.0154304	0.00938086	0.00995962	0.0100255	0.00845506	0.00767767	0.00836013	0.008477
TCGA-AO-A0JM-01Z-00-DX1.94E75EFD-E5F5-4DF8-93A0-ED94CB4D203A-32-59759x45769-1867x1430.png	1430	352.675	728.235	974.236	857.124	948.01	832.083	960.633	844.101	2.25519	475.849	0.794125	20.0202	0.988912	0.526018	0.491847	30.6971	31.0546	6.352	2.54846	2.28113	17.2504	16.2395	-1.4498	96.347	0.770285	0.45495	0.0556905	0.136489	0.0649262	0.032987	0.0227321	0.0220516	0.0318085	0.0270346	0.0156105	0.0171812	0.0123781	0.0116368	0.0128646	0.0150781	0.0154614	0.00941669	0.00975605	0.00990927	0.00804396	0.0076511	0.00842726	0.00850923
TCGA-AO-A124-01Z-00-DX1.E3C7B017-6154-4630-9BDE-0CAC946D0209-32-31871x41172-995x1286.png	1286	238.957	531.104	614.975	718.911	592.858	697.226	603.45	707.629	2.68457	344.605	0.799902	16.4873	0.995789	0.484922	0.438408	26.1676	26.2246	4.99752	2.06088	1.78972	14.6551	13.95	-1.40114	85.862	0.721923	0.42682	0.0568568	0.121005	0.063083	0.034275	0.0231362	0.0227924	0.0299318	0.0272771	0.0168541	0.0171514	0.0129385	0.0118482	0.0138432	0.0147496	0.016025	0.010232	0.0105066	0.0103238	0.00862038	0.00851985	0.00929704	0.0093181
TCGA-AO-A125-01Z-00-DX1.DFC45CE1-5D81-4C2B-9281-60E2F146DDB6-32-45815x33792-1431x1056.png	1056	310.295	625.459	725.116	597.093	701.093	573.616	712.613	584.879	2.25393	418.51	0.780563	18.7809	0.997384	0.532561	0.499534	28.1089	28.3793	6.01583	2.43744	2.16474	16.5117	15.6362	2.79297	89.8798	0.767487	0.471713	0.0581498	0.135333	0.06576	0.0333538	0.0240827	0.0213322	0.0311382	0.0272358	0.0160375	0.0172052	0.0131412	0.0113797	0.0127026	0.01453	0.0154458	0.00962436	0.0101906	0.0102731	0.00852097	0.00825571	0.00879898	0.00849783
TCGA-AO-A126-01Z-00-DX1.D9D6AA15-32F0-44BD-AF30-36191784FFA2-32-57767x38616-1805x1206.png	1206	331.227	689.141	1143.26	451.856	1118.94	426.17	1130.59	438.56	2.27392	448.861	0.793566	19.4522	0.990883	0.518078	0.486973	29.808	30.1572	6.18056	2.48371	2.21144	16.8266	15.8291	3.90717	93.8404	0.765442	0.453604	0.055968	0.13631	0.0644285	0.03331	0.0230026	0.0214073	0.0314569	0.0266331	0.0160564	0.0170108	0.0123625	0.0116833	0.0127766	0.0147834	0.0152377	0.00946796	0.00984957	0.0100992	0.00805454	0.00776187	0.0085229	0.00855611
TCGA-AO-A128-01Z-00-DX1.4E6BFFBC-87AD-4ED4-959D-FEB5545400BE-32-41831x33941-1307x1060.png	1060	267.368	570.957	741.769	558.873	718.704	536.379	729.736	547.064	2.65771	380.346	0.771834	17.4899	0.994575	0.496588	0.434561	26.3968	26.8593	5.39653	2.18435	1.89468	16.0022	15.195	-1.51428	90.1523	0.721649	0.448088	0.0583641	0.128366	0.0604198	0.0346008	0.0244889	0.021867	0.0288087	0.026433	0.016421	0.017242	0.0136975	0.0120691	0.013257	0.0143784	0.0159533	0.010084	0.0103787	0.0106146	0.00868355	0.00849219	0.00924285	0.00899547
TCGA-AO-A129-01Z-00-DX1.BF485416-BF57-4F39-866B-4B1E201876FA-32-49799x42825-1556x1338.png	1338	273.006	575.203	799.715	596.17	776.927	573.269	787.775	584.25	2.35618	375.793	0.792269	17.6371	0.997464	0.510633	0.481646	27.357	27.4957	5.56643	2.27807	2.02069	15.3531	14.6653	-4.00891	85.7985	0.751254	0.445191	0.057276	0.128236	0.0643154	0.0338768	0.0232264	0.02233	0.030874	0.0270725	0.0165318	0.0172442	0.0129946	0.0120852	0.0135394	0.0145002	0.0158749	0.00974669	0.0102864	0.0100701	0.0083416	0.00819069	0.00902882	0.0089433
TCGA-AO-A12A-01Z-00-DX1.4E9609A7-9AAD-40A8-8344-8369DF998006-32-65735x43850-2054x1370.png	1370	316.086	632.094	1067.75	696.256	1043.8	672.347	1055.32	683.785	2.12126	421.234	0.772578	19.0592	0.98961	0.539834	0.52126	28.1186	28.4172	6.21155	2.51171	2.24994	16.6943	15.8492	-1.0231	88.6536	0.779404	0.485634	0.0565738	0.140281	0.0657698	0.0319008	0.024418	0.0206866	0.0305807	0.0273043	0.0151559	0.0173396	0.0132621	0.0117793	0.0126665	0.0144601	0.0155174	0.00934458	0.00980592	0.0100993	0.00867435	0.00777336	0.00867627	0.00842022
TCGA-AO-A12B-01Z-00-DX1.B215230B-5FF7-4B0A-9C1E-5F1658534B11-32-63743x42973-1991x1342.png	1342	322.918	680.103	632.063	718.372	607.094	693.572	619.1	705.489	2.353	439.607	0.799945	19.1298	0.98805	0.509846	0.474355	29.9324	30.2156	6.01063	2.43115	2.16735	16.394	15.4504	-1.57771	93.4136	0.757284	0.43966	0.0542124	0.132739	0.0632255	0.0326256	0.0227917	0.0229099	0.0314063	0.0268682	0.0157796	0.0167846	0.0123223	0.011577	0.0133233	0.015119	0.0152231	0.00929526	0.00988829	0.00978973	0.00800804	0.00778329	0.00845289	0.00884311
TCGA-AO-A12C-01Z-00-DX1.F4105027-FA10-48AF-BA8F-C7A0181C4A1D-32-95615x35478-2987x1108.png	1108	344.074	683.942	1411.89	434.373	1387.03	409.441	1398.91	421.388	2.17553	459.592	0.775096	19.8578	0.989122	0.537916	0.503738	29.1207	29.5593	6.43299	2.57633	2.3021	17.5122	16.53	0.528065	93.723	0.774681	0.481336	0.0574986	0.141529	0.0656518	0.0326861	0.0238672	0.0199464	0.0314407	0.0267798	0.0152889	0.017028	0.0131634	0.0116475	0.0124328	0.0143859	0.0150849	0.00938919	0.00976327	0.0102606	0.00853396	0.00768272	0.00846267	0.00837835
TCGA-AO-A12D-01Z-00-DX1.BA006BAD-5C6E-4099-BC99-3888E69F506E-32-55775x42281-1742x1321.png	1321	255.837	532.812	875.606	690.745	853.575	668.541	864.056	679.12	2.45892	354.054	0.788255	17.0636	0.992754	0.506372	0.466978	26.3332	26.4495	5.32931	2.19597	1.92874	15.0362	14.3517	-1.45576	84.4775	0.741132	0.44712	0.058196	0.127036	0.0639815	0.034709	0.0237403	0.0217659	0.0297551	0.0277491	0.0163276	0.0173086	0.0130713	0.0122874	0.0136306	0.0144199	0.016093	0.00991177	0.0102414	0.0102741	0.00844553	0.00867068	0.00940861	0.0092616
TCGA-AO-A12E-01Z-00-DX1.F2797928-26EC-4B28-BC50-432EB380624B-32-57767x44528-1805x1391.png	1391	258.794	553.882	1088.39	818.786	1066.12	795.93	1076.73	806.853	2.44148	360.691	0.804625	17.1971	0.996964	0.501334	0.465588	27.166	27.3765	5.37088	2.20595	1.94493	14.884	14.1537	-3.38359	85.2514	0.740659	0.427469	0.0544189	0.128274	0.0640596	0.0338151	0.0226498	0.023307	0.0313979	0.0270434	0.0162652	0.0165998	0.0123892	0.0117528	0.013617	0.0149578	0.01592	0.010124	0.0101109	0.0102053	0.00832152	0.00852973	0.0090889	0.00916323
TCGA-AO-A12F-01Z-00-DX1.847C8E4F-3F37-4B1D-8E6E-ACD14391AD89-32-71711x44555-2240x1392.png	1392	306.976	640.23	1096.66	690.819	1073.39	666.09	1084.5	677.964	2.31947	418.549	0.787906	18.6703	0.994365	0.515351	0.484317	28.4059	28.7191	5.94311	2.40473	2.13095	16.2942	15.4361	3.31177	90.5079	0.757805	0.455913	0.0576282	0.133089	0.0645362	0.0337632	0.0231808	0.0219997	0.0313386	0.0271593	0.0162212	0.0168318	0.0126898	0.0120273	0.0129278	0.0145625	0.0155003	0.00974998	0.0100628	0.00998833	0.00837223	0.00793941	0.00866394	0.00860419
TCGA-AO-A12G-01Z-00-DX1.1C37E1FE-CF36-4570-A864-3813B8ADBA36-32-33863x37140-1058x1160.png	1160	243.565	530.691	506.5	639.366	484.356	617.479	494.916	627.987	2.66944	348.753	0.789903	16.7336	0.998014	0.491939	0.438511	26.1564	26.3147	5.09357	2.09654	1.83259	14.9314	14.2221	5.42619	86.4707	0.72353	0.433446	0.0571782	0.124188	0.0624472	0.0346742	0.0240331	0.0228752	0.0296688	0.0266119	0.0166163	0.0175063	0.013243	0.0118668	0.0138359	0.014196	0.0163896	0.0102984	0.0107255	0.0103124	0.0087575	0.00853621	0.00910051	0.00923903
TCGA-AO-A12H-01Z-00-DX1.C6CCBD9D-FB41-4F6C-84FB-A43E0A77E696-32-61751x46761-1929x1461.png	1461	298.154	616.706	1101.78	794.924	1078.4	771.066	1089.61	782.473	2.23419	401.453	0.787374	18.4146	0.99077	0.524674	0.507827	28.103	28.3606	5.93418	2.40992	2.14598	15.9024	15.1525	-1.18439	87.627	0.770158	0.462809	0.0586505	0.133185	0.0654813	0.0336366	0.0235961	0.0216933	0.0304143	0.0271847	0.0157138	0.0170796	0.0128983	0.0118808	0.0130372	0.0145929	0.015594	0.00948262	0.00996968	0.0100845	0.00836268	0.00825312	0.00882414	0.0088133
TCGA-AO-A1KO-01Z-00-DX1.EEB5E0A0-92B2-42CD-9F7A-00E9250B561F-32-49933x41465-1560x1295.png	1295	320.213	676.138	762.556	629.493	737.051	605.461	749.259	616.975	2.34775	436.665	0.796726	19.1158	0.987063	0.513571	0.477762	29.7217	29.9977	6.03517	2.43452	2.15727	16.4326	15.5485	-7.35885	93.1975	0.759318	0.445589	0.0552262	0.133	0.0639655	0.0335765	0.0226021	0.0224439	0.0310597	0.0267949	0.0159166	0.0168364	0.0124584	0.0119419	0.0128677	0.0146667	0.0152836	0.00954723	0.00990822	0.00985753	0.00799349	0.00771064	0.00854626	0.00870339
TCGA-AO-A1KP-01Z-00-DX1.612442AB-24E2-489B-9838-7CEE82BCD605-32-45938x35350-1435x1104.png	1104	333.709	672.264	712.746	422.193	687.33	398.337	699.497	409.768	2.2553	447.878	0.781013	19.4666	0.991551	0.529938	0.494618	28.9997	29.4529	6.2494	2.50602	2.22925	17.0302	16.0921	1.71325	93.4734	0.770059	0.47226	0.0574881	0.138468	0.0646509	0.0332867	0.022824	0.0205647	0.0310853	0.0269953	0.0155372	0.0167753	0.0129326	0.011431	0.0126566	0.0147366	0.0156487	0.00956832	0.0100067	0.0101659	0.00822689	0.00774265	0.00876295	0.00852607
TCGA-AO-A1KR-01Z-00-DX1.BFB2E69B-E23C-4542-9CBF-EDD040B985AC-32-57922x44329-1810x1385.png	1385	343.705	680.666	976.779	739.914	952.268	714.903	964.039	726.896	2.19797	458.016	0.765959	19.7832	0.987551	0.53693	0.500972	28.7405	29.2545	6.42962	2.57066	2.28925	17.5592	16.6192	-2.46172	93.5938	0.77304	0.48663	0.0568637	0.141471	0.0645173	0.0324592	0.02447	0.0202385	0.0305722	0.0270889	0.0152832	0.0173897	0.0132271	0.0115303	0.0123103	0.014574	0.0150847	0.00927942	0.00979407	0.0102613	0.00863977	0.00771498	0.00858634	0.00851078
TCGA-AO-A1KS-01Z-00-DX1.349F9BCA-C9F0-43B4-BA6A-D20039E1C720-32-53927x39998-1685x1249.png	1249	357.713	712.888	797.731	806.299	772.639	780.744	784.697	793.072	2.22896	479.729	0.769711	20.1635	0.985869	0.534377	0.4954	29.5201	29.9888	6.50695	2.59029	2.30291	17.9131	16.8735	-0.127307	96.4548	0.771154	0.48267	0.0566351	0.141206	0.0650403	0.0326477	0.0241986	0.0202094	0.030776	0.0267474	0.0154034	0.0172941	0.013214	0.0116503	0.0123126	0.0146017	0.0153807	0.00954126	0.00995263	0.0102754	0.0086449	0.00774031	0.00855154	0.00847411
TCGA-AO-A1KT-01Z-00-DX1.47878910-4359-4795-B0BB-FAC147C8D932-32-47935x39697-1497x1240.png	1240	322.782	665.513	699.918	655.754	674.181	632.451	686.552	643.578	2.37472	441.167	0.780698	19.1392	0.992097	0.516132	0.469316	28.8996	29.2673	6.03778	2.42484	2.1459	16.9545	15.995	2.96554	94.0134	0.752572	0.458025	0.0556184	0.13446	0.063864	0.0334967	0.0241046	0.0215905	0.0310621	0.0266718	0.0155781	0.0172234	0.0131876	0.0118423	0.0127481	0.0148756	0.0154753	0.00942365	0.00996606	0.0101681	0.00840269	0.00802227	0.00890446	0.00892937
TCGA-AQ-A04H-01Z-00-DX1.5AC1E459-EF27-401D-98FD-0AC16559AF17-32-134417x39007-4200x1218.png	1218	288.69	581.89	2140.23	646.298	2116.95	623.584	2128.07	634.387	2.29704	390.181	0.77091	18.1987	0.992085	0.527319	0.490815	26.8627	27.1444	5.83285	2.36629	2.09797	16.1573	15.3776	2.74328	87.4537	0.761027	0.47692	0.057886	0.135215	0.0646512	0.0332447	0.0248133	0.0207709	0.0304108	0.0268205	0.0157552	0.0174397	0.0135782	0.0117772	0.0128762	0.0143978	0.0155189	0.00954184	0.0102604	0.0102448	0.00875476	0.00810552	0.008795	0.00864298
TCGA-AQ-A04J-01Z-00-DX1.6A4E16D4-2696-4E5F-BCA8-708556FC3A8C-32-152319x56763-4759x1773.png	1773	295.71	596.039	2415.54	829.576	2392.75	805.873	2403.67	817.205	2.24167	398.598	0.78054	18.3674	0.994174	0.527128	0.497556	27.3447	27.6851	5.89794	2.39642	2.13307	16.1394	15.3288	1.98453	87.4979	0.764682	0.469174	0.0581533	0.136015	0.0649797	0.0335054	0.0238106	0.0215774	0.0306709	0.0272438	0.0157284	0.0171051	0.0130416	0.0119545	0.0128468	0.0144042	0.0156667	0.00948114	0.0101363	0.01017	0.00862991	0.00821213	0.00874276	0.00882842
TCGA-AQ-A04L-01Z-00-DX1.F35BF4DD-896A-43C2-8DA6-C67945C003BE-32-67208x55081-2100x1721.png	1721	290.116	607.684	1272.46	967.192	1247.9	944.498	1259.69	955.382	2.29368	395.65	0.803529	18.2431	0.99187	0.512627	0.48933	28.3864	28.659	5.78955	2.36084	2.09573	15.6744	14.8136	-3.56318	87.7101	0.758184	0.441836	0.0558822	0.132052	0.0644709	0.0337372	0.0227489	0.0226553	0.0318571	0.0267368	0.0162176	0.0168448	0.0124512	0.011962	0.0132391	0.0147175	0.0154561	0.00969052	0.00996605	0.0101611	0.00789255	0.00796526	0.00859485	0.00869658
TCGA-AQ-A0Y5-01Z-00-DX1.f68f5b49-30fa-4fb6-bec6-5da9f6809d02-32-150415x48894-4700x1527.png	1527	275.446	565.484	2416.15	849.433	2393.6	826.404	2404.34	837.456	2.26659	374.391	0.781923	17.8092	0.992472	0.515832	0.491631	26.8068	27.135	5.69808	2.32599	2.06874	15.6344	14.8721	-3.78606	85.0502	0.757104	0.460186	0.0576851	0.134055	0.0638977	0.0340077	0.0240253	0.0218424	0.0303817	0.0271365	0.0160658	0.0173263	0.0132138	0.0115646	0.013101	0.0146971	0.0157221	0.0096756	0.0102449	0.0101524	0.00845377	0.00805336	0.00878527	0.00889415
TCGA-AQ-A54N-01Z-00-DX1.E53271E9-AFD2-4071-9B1E-CD05F63B8136-32-78063x76774-2439x2399.png	2399	334.766	671.25	1099.98	1135.98	1075.67	1111.22	1087.33	1123.14	2.31754	453.755	0.767236	19.4828	0.989042	0.52899	0.48175	28.4671	28.9085	6.23106	2.48796	2.20473	17.5203	16.5487	1.668	94.5921	0.760334	0.479157	0.0577989	0.138779	0.0643066	0.0334278	0.0249405	0.0198016	0.0307863	0.0267038	0.0157825	0.0176395	0.0139078	0.0116571	0.0126205	0.0146976	0.0152558	0.00952681	0.010031	0.0104924	0.00876585	0.00780924	0.00864712	0.00872674
TCGA-AQ-A7U7-01Z-00-DX1.AB5629A1-399E-402B-AD3D-DAF9F97D8300-32-185639x88154-5801x2754.png	2754	312.462	639.242	3397.26	1497.15	3372.15	1474.12	3384.24	1485.16	2.30269	422.101	0.788829	18.8319	0.991731	0.525731	0.485784	28.6567	29.0198	5.9849	2.42266	2.15157	16.3348	15.4865	2.59758	90.9128	0.762662	0.456192	0.0557737	0.13508	0.064258	0.0332329	0.0231425	0.0217315	0.0308387	0.0268087	0.0158445	0.0170176	0.0127457	0.0118281	0.0128458	0.0147033	0.0154871	0.0095789	0.0100629	0.00997203	0.00835643	0.00802598	0.00868242	0.0088222
TCGA-AR-A0TP-01Z-00-DX1.58E6A3A6-D1D7-4AE5-87A5-E823F04CBB2F-32-75208x83190-2350x2599.png	2599	290.076	591.542	1203.07	1322.61	1179.62	1299.86	1190.87	1310.7	2.30189	393.753	0.780358	18.1734	0.991937	0.525833	0.496738	27.2396	27.4478	5.83042	2.37035	2.10078	16.0035	15.2468	1.22033	87.402	0.76094	0.47078	0.0591534	0.131792	0.0660141	0.0335422	0.023832	0.0216445	0.0299112	0.0270762	0.0162759	0.0171219	0.0131881	0.0119728	0.012996	0.0140207	0.0154076	0.00987904	0.0103373	0.0101231	0.00865603	0.0081712	0.00903651	0.00879456
TCGA-AR-A0TQ-01Z-00-DX1.2BEA298C-6B3D-4133-ADBC-769E62CEFFA0-32-54264x55796-1695x1743.png	1743	337.067	673.888	828.666	841.606	803.813	817.087	815.782	828.848	2.16603	451.522	0.77478	19.6264	0.988365	0.536031	0.508556	28.9466	29.3869	6.36553	2.55588	2.28211	17.2746	16.3361	1.87652	92.3574	0.77292	0.477691	0.0583564	0.139474	0.0649853	0.0332771	0.0241278	0.0209107	0.0310335	0.0267933	0.0157012	0.0170739	0.0131851	0.0114875	0.0125331	0.0144391	0.0151309	0.00944559	0.00980519	0.0100899	0.00848794	0.00763783	0.0086955	0.00852574
TCGA-AR-A0TR-01Z-00-DX1.BBCE653F-7DD0-4830-BAD3-C06207A93853-32-124712x82845-3897x2588.png	2588	316.966	641.1	1832.52	1294.22	1807.7	1270.82	1819.62	1282.02	2.24731	427.838	0.784086	19.0242	0.99016	0.529414	0.494392	28.5494	28.8711	6.0774	2.45506	2.18944	16.6427	15.7342	-2.12401	90.9734	0.76613	0.466397	0.0565365	0.137099	0.0654351	0.032854	0.0235521	0.021287	0.0315442	0.02725	0.0156347	0.0171127	0.0129318	0.0114968	0.0128216	0.0148406	0.0156365	0.00949557	0.0101283	0.0101073	0.00846014	0.00776499	0.00867933	0.00865086
TCGA-AR-A0TS-01Z-00-DX1.2DB81A2E-16C1-4EE0-8175-65FA46768277-32-142800x81791-4462x2555.png	2555	318.236	646.732	2414.33	1299.51	2389.5	1276.01	2401.42	1287.25	2.21835	428.459	0.781757	19.0695	0.990102	0.532641	0.502282	28.608	28.9435	6.12208	2.47301	2.20636	16.6315	15.7447	0.0128341	90.7375	0.770731	0.471737	0.0570681	0.137811	0.0653412	0.0327194	0.0235368	0.0212341	0.0311936	0.0271342	0.0155876	0.0169557	0.0130783	0.0115408	0.0127324	0.0147573	0.0155718	0.00941291	0.010022	0.0100699	0.00846893	0.00781296	0.00866113	0.00860219
TCGA-AR-A0TT-01Z-00-DX1.127C2A4F-62AC-4E83-99DB-13519BD2949D-32-126616x76587-3956x2393.png	2393	333.637	667.508	1371.22	1062.81	1346.32	1038.54	1358.3	1050.13	2.22894	448.368	0.777208	19.4691	0.98832	0.535504	0.496259	28.9846	29.3436	6.24192	2.50855	2.24158	17.1106	16.1691	-4.80784	92.9973	0.770003	0.47437	0.0570402	0.138473	0.0647751	0.0331116	0.0241502	0.0204842	0.0312429	0.0269176	0.0154169	0.0171955	0.0131138	0.0114463	0.0126747	0.0146808	0.015567	0.00942294	0.00986645	0.0101289	0.00845589	0.00798047	0.00859617	0.00856234
TCGA-AR-A0TU-01Z-00-DX1.2CBBDDAB-C1DD-4205-A555-431542F9C069-32-136136x60100-4254x1878.png	1878	341.829	687.805	2101.98	865.37	2077.07	840.372	2089.03	852.341	2.27956	462.027	0.773938	19.7414	0.987041	0.528742	0.486828	29.1961	29.6369	6.31666	2.52737	2.24537	17.5178	16.5024	0.942071	95.1019	0.763311	0.47429	0.0564863	0.139326	0.0646429	0.0325704	0.0239329	0.0206795	0.031247	0.0266359	0.0154285	0.0172434	0.0132657	0.0115375	0.0125901	0.014658	0.01532	0.00942677	0.0100321	0.010201	0.00851105	0.00779891	0.00857974	0.0086074
TCGA-AR-A0TV-01Z-00-DX1.29AE9996-E73A-41F8-BCC9-23DEDCA5A7AC-32-79016x71663-2469x2239.png	2239	336.626	663.709	945.226	1176.62	920.649	1152.06	932.453	1163.83	2.20363	450.233	0.771545	19.6353	0.989704	0.540487	0.498488	28.7501	29.2015	6.33458	2.54272	2.26466	17.3365	16.4093	1.40187	93.1757	0.772609	0.480797	0.0570173	0.141072	0.0650147	0.0328144	0.0241571	0.0204943	0.0308837	0.0269416	0.0153264	0.0172931	0.0132072	0.0114114	0.0124494	0.0148054	0.0153336	0.00934449	0.00991613	0.0101746	0.00850747	0.00765717	0.00851701	0.00853885
TCGA-AR-A0TW-01Z-00-DX1.0C1EAE07-6BA6-4908-89E1-0133F3640174-32-146608x82106-4581x2565.png	2565	345.365	684.376	2318.81	1420.04	2293.5	1395.65	2305.65	1407.34	2.17957	459.77	0.773563	19.8508	0.989143	0.539313	0.502643	29.0675	29.5677	6.42519	2.57229	2.29148	17.4667	16.4993	4.06405	93.8666	0.77599	0.481466	0.0576791	0.141728	0.0650799	0.0328362	0.0240049	0.0207716	0.0311436	0.0269124	0.0153752	0.0170939	0.0131005	0.0113156	0.0123713	0.0147131	0.0152657	0.00927333	0.00982188	0.0100724	0.00852649	0.00765998	0.00845529	0.00845025
TCGA-AR-A0TX-01Z-00-DX1.5BEA4E65-8CEC-49B2-9F29-DBE53E8ED46E-32-71400x67084-2231x2096.png	2096	293.425	658.542	1255.53	1146.35	1231.26	1122.25	1242.89	1133.81	2.42472	413.797	0.813328	18.1811	0.992177	0.490978	0.467189	29.3361	29.368	5.6465	2.29956	2.03275	15.6028	14.6848	-2.06531	90.3569	0.740976	0.424333	0.0551585	0.125841	0.0641332	0.0339428	0.021878	0.0235926	0.0314676	0.0268739	0.0166118	0.0169846	0.0124677	0.0123579	0.0131367	0.015001	0.0154752	0.00997709	0.0101022	0.00996916	0.00823012	0.00847971	0.00874917	0.00894006
TCGA-AR-A0TY-01Z-00-DX1.089EB6B4-9921-441D-84F3-C64C97AFC3B4-32-86632x66370-2707x2074.png	2074	334.119	661.078	1350.79	932.12	1326.08	907.806	1337.95	919.469	2.12201	442.367	0.774826	19.5923	0.989479	0.542748	0.515122	28.8355	29.2396	6.36783	2.56262	2.29057	17.0657	16.1985	-2.18228	91.3612	0.781001	0.482527	0.0568927	0.14162	0.0655289	0.0323551	0.0240265	0.0209994	0.0310798	0.027032	0.0153628	0.017033	0.0132734	0.0114394	0.0123911	0.0146936	0.0153646	0.00928269	0.00985673	0.010162	0.00843486	0.00772271	0.00842081	0.00847454
TCGA-AR-A0TZ-01Z-00-DX1.2D58BE38-03F6-4310-8E06-F1A523FB0904-32-45696x66354-1428x2073.png	2073	273.869	583.752	803.657	1061.11	780.409	1038.51	791.555	1049.3	2.57636	387.985	0.785595	17.6041	0.991736	0.498507	0.445653	26.9803	27.2179	5.41827	2.20417	1.93683	15.8504	14.9727	0.902566	89.7011	0.728019	0.445039	0.0565916	0.127942	0.0639566	0.034531	0.0236258	0.0220036	0.0301761	0.026859	0.0166438	0.0175186	0.0133131	0.0118229	0.0129866	0.0147605	0.015545	0.00994503	0.0105361	0.0105077	0.00876253	0.00839315	0.00901731	0.00912761
TCGA-AR-A0U0-01Z-00-DX1.C8BECD9F-68D9-47B1-B31E-C1C6CAE456B6-32-72352x42241-2261x1320.png	1320	314.575	653.04	1103.4	628.827	1077.96	605.563	1090.24	616.698	2.38938	431.352	0.786448	18.9135	0.991394	0.517177	0.475093	28.9533	29.3134	5.9783	2.40875	2.13246	16.5649	15.6837	-1.2052	92.9689	0.75407	0.453302	0.0567016	0.134199	0.0633433	0.0333666	0.0230875	0.0214645	0.0309093	0.0264367	0.0159035	0.0170119	0.0130404	0.0117996	0.0129889	0.0147094	0.0152122	0.00968406	0.0102909	0.0101466	0.00842169	0.00823244	0.00859335	0.00868906
TCGA-AR-A0U2-01Z-00-DX1.03E2ADD9-F20F-44DA-93D1-D10BBD3844A5-32-128520x67038-4016x2094.png	2094	297.966	607.124	2890.33	1113.45	2865.92	1090.77	2877.63	1101.59	2.22715	401.124	0.794087	18.4698	0.991101	0.527883	0.501407	28.2509	28.4625	5.88934	2.39854	2.1445	15.8778	15.06	0.168029	87.8498	0.769404	0.457824	0.0562175	0.134704	0.0659912	0.0329291	0.0231277	0.0223576	0.0317468	0.0275654	0.015896	0.016729	0.0127125	0.011801	0.0129824	0.0147436	0.0158067	0.00959856	0.0100585	0.0100025	0.00828817	0.00805184	0.00881846	0.00874506
TCGA-AR-A0U3-01Z-00-DX1.9BB87F9D-459F-4A18-B591-29822EA5AE18-32-137088x67500-4284x2109.png	2109	320.477	654.268	2259.96	1108.57	2235.47	1084.36	2247.21	1095.95	2.26356	433.826	0.784946	19.145	0.991856	0.526663	0.492391	28.7667	29.1491	6.10984	2.46206	2.19572	16.7497	15.8338	1.50322	91.9475	0.765548	0.46474	0.056901	0.136921	0.0650106	0.0334982	0.0234071	0.0214393	0.0313765	0.0271675	0.0157595	0.0171062	0.0128481	0.0116515	0.0128002	0.0146699	0.0155104	0.00949828	0.0100172	0.0101477	0.00833587	0.0078676	0.00862721	0.00863309
TCGA-AR-A0U4-01Z-00-DX1.DE722DC5-859D-4866-ADCC-ED98EDBFB588-32-111384x91613-3480x2862.png	2862	346.813	704.213	1713.79	1634.09	1687.88	1609.66	1700.35	1621.35	2.35069	473.374	0.775158	19.8244	0.986431	0.524936	0.475293	29.4957	29.9419	6.30222	2.51253	2.22671	17.6873	16.6536	1.36896	97.0035	0.756111	0.468535	0.0564557	0.137514	0.0638185	0.0327945	0.0237836	0.020904	0.0310381	0.0265789	0.0154429	0.0173607	0.013281	0.0114345	0.0127108	0.0147666	0.0152245	0.00940828	0.0100431	0.0103443	0.00851548	0.00780563	0.00859204	0.00858675
TCGA-AR-A1AH-01Z-00-DX1.5D5D7774-77BB-4EA0-9E8E-A8D28F70A575-32-130424x80193-4075x2506.png	2506	307.446	623.738	1539.36	1375.35	1514.16	1352.99	1526.23	1363.65	2.25052	413.782	0.788635	18.6763	0.990521	0.5328	0.501036	28.4846	28.7266	5.937	2.41536	2.15962	16.0498	15.2465	-1.55152	89.6082	0.771718	0.464114	0.0553984	0.135155	0.0660611	0.0322534	0.0231976	0.0219088	0.0314144	0.0273226	0.0155018	0.0167528	0.0128637	0.0119768	0.0130247	0.0147222	0.0156382	0.00945662	0.00993279	0.0100017	0.00840868	0.008155	0.00886075	0.00882207
TCGA-AR-A1AI-01Z-00-DX1.5EF2A589-4284-45CF-BF0C-169E3A85530C-32-92344x72764-2885x2273.png	2273	362.363	723.931	1029.31	1148.29	1003.69	1122.92	1016.02	1135.1	2.2752	487.862	0.772122	20.2818	0.985571	0.533668	0.485423	29.7384	30.2513	6.5007	2.58619	2.29829	18.0719	17.0118	2.32435	97.8712	0.766272	0.478238	0.0564464	0.141106	0.0645455	0.0325384	0.0238828	0.0203413	0.0311259	0.0266811	0.015286	0.0174041	0.0132315	0.0113844	0.0124847	0.0146915	0.0152315	0.0094462	0.00992096	0.0103477	0.00850802	0.00751509	0.00850022	0.00850271
TCGA-AR-A1AJ-01Z-00-DX1.34B9FCF0-74D8-4328-9B5A-698AD57EDA85-32-96152x56466-3004x1764.png	1764	347.864	704.383	1574.78	859.787	1548.71	835.549	1561.27	847.169	2.25393	469.753	0.778879	19.8528	0.99178	0.528467	0.49016	29.5167	30.0493	6.37151	2.5473	2.26558	17.5287	16.5281	-2.28499	95.2618	0.765434	0.468208	0.0569202	0.138997	0.064014	0.0329883	0.0234939	0.0211426	0.0312145	0.026901	0.0154835	0.0170609	0.0129043	0.0118454	0.0127008	0.0147028	0.0153582	0.00931625	0.00983774	0.0101869	0.00831618	0.00780368	0.00855642	0.00851505
TCGA-AR-A1AK-01Z-00-DX1.0AFFA0B5-D1A6-43E9-892A-7CB16A79E5F9-32-82824x51741-2588x1616.png	1616	355.702	709.251	1407.43	812.726	1381.66	788.002	1394.07	799.797	2.23754	478.185	0.777988	20.0876	0.985547	0.536521	0.492514	29.644	30.1205	6.41999	2.56664	2.28755	17.7492	16.7129	1.08984	96.4042	0.770276	0.475708	0.0569113	0.140407	0.0654366	0.0329765	0.0234599	0.0208318	0.0316779	0.0270249	0.0154568	0.0170723	0.0128815	0.0114893	0.0125416	0.0147518	0.0152599	0.00941701	0.00984588	0.0101968	0.00852062	0.00792479	0.00849328	0.00846021
TCGA-AR-A1AL-01Z-00-DX1.0970370F-6D4B-449A-AF33-76355DD99F91-32-71400x57377-2231x1793.png	1793	336.535	676.172	1149.78	888.94	1124.8	864.471	1136.8	876.199	2.22144	452.763	0.773214	19.642	0.987797	0.533536	0.496084	28.9461	29.3309	6.32141	2.53117	2.25395	17.3785	16.4012	-0.129371	93.6639	0.769898	0.479616	0.0572858	0.140074	0.0652083	0.0324342	0.0239956	0.0207171	0.0312129	0.0269824	0.015591	0.0170939	0.0132616	0.0115163	0.0125231	0.0147332	0.0151585	0.00935709	0.0100692	0.0101561	0.00869999	0.00762148	0.00860572	0.00847678
TCGA-AR-A1AM-01Z-00-DX1.B3F006D9-9386-41E5-B0B1-B0832EE104A0-32-97673x51865-3052x1620.png	1620	361.893	738.226	1639.06	859.396	1610.4	836.151	1624.14	847.306	2.2855	488.98	0.794537	20.2775	0.993228	0.529126	0.488349	31.1464	31.5891	6.47011	2.58135	2.29741	17.4948	16.5032	5.08964	97.7833	0.767365	0.452331	0.0566435	0.136287	0.0640763	0.0337402	0.0224925	0.0208451	0.0313071	0.0266344	0.0155836	0.0168208	0.0124452	0.0117154	0.0126784	0.0146678	0.0149713	0.00938124	0.00996545	0.00986465	0.007934	0.00768731	0.00856466	0.00868043
TCGA-AR-A1AN-01Z-00-DX1.1118F9FE-6DF2-4496-B102-D3A10D332EC0-32-120904x48479-3778x1514.png	1514	304.497	618.99	2733.63	663.224	2709.59	639.409	2721.14	650.776	2.13222	403.989	0.805697	18.7582	0.997352	0.532135	0.515219	28.963	29.2754	6.00792	2.45646	2.19543	15.653	14.9111	-0.976548	87.4315	0.781425	0.450615	0.0551016	0.136372	0.0664866	0.033032	0.0219106	0.0234208	0.0325453	0.0275914	0.0155169	0.0166131	0.0122686	0.0117776	0.0127451	0.0149816	0.0153387	0.00934388	0.00973412	0.00991418	0.00785451	0.00777129	0.00842264	0.00855652
TCGA-AR-A1AO-01Z-00-DX1.244DEE5B-0896-452F-A14D-E290260A9D8F-32-109480x38485-3421x1202.png	1202	320.049	640.324	998.752	628.36	974.087	604.862	985.977	616.135	2.19519	430.415	0.787104	19.0651	0.985646	0.534297	0.501357	28.6323	29.0384	6.13027	2.47401	2.19889	16.4885	15.6597	2.94577	90.589	0.771573	0.464135	0.0571114	0.136791	0.0650515	0.0344858	0.0233105	0.0225921	0.0311526	0.0273245	0.0161154	0.0169651	0.0130193	0.0114495	0.0126447	0.0146293	0.0157767	0.00943454	0.0098652	0.010021	0.00820588	0.00777466	0.00856766	0.00845375
TCGA-AR-A1AP-01Z-00-DX1.F163EED5-0385-41AA-BA35-54E4910CD99E-32-104720x51990-3272x1624.png	1624	333.879	718.118	1621.02	835.858	1595.2	810.874	1607.64	822.895	2.43616	466.766	0.786953	19.4821	0.990468	0.504961	0.469426	30.0308	30.4104	6.14245	2.45682	2.17375	17.3319	16.2839	-4.91067	96.4679	0.743184	0.447917	0.0555436	0.132719	0.0628341	0.0334188	0.0232744	0.0212689	0.0309576	0.0265952	0.016186	0.0170362	0.0126188	0.0119062	0.0127601	0.0148424	0.0150912	0.00962252	0.0100112	0.010146	0.00811594	0.00777396	0.00859408	0.008716
TCGA-AR-A1AQ-01Z-00-DX1.09D5D7FC-0FA8-4176-94B2-995F44D8ED4C-32-99960x56617-3123x1769.png	1769	348.27	696.101	894.77	968.838	868.904	944.492	881.31	956.133	2.22642	467.219	0.779215	19.9355	0.985162	0.533854	0.495082	29.5598	29.9584	6.3858	2.55934	2.28244	17.5141	16.5219	-2.34189	95.1797	0.770259	0.474166	0.0566937	0.139498	0.0651814	0.0329736	0.0236489	0.0209359	0.0314513	0.0267902	0.0153637	0.0172291	0.0131452	0.0118201	0.0123958	0.0147309	0.0154081	0.00929029	0.00994536	0.0102027	0.00834628	0.00761891	0.00848556	0.00857981
TCGA-AR-A1AR-01Z-00-DX1.E7B7F6F0-9CC0-4D4F-8C9F-443A74D2BE40-32-64736x57072-2023x1783.png	1783	349.234	696.457	940.321	865.177	915.047	840.326	927.195	852.25	2.23283	469.034	0.777084	19.9238	0.987716	0.536519	0.4935	29.5274	29.945	6.39069	2.55793	2.27991	17.5167	16.5025	0.065034	95.2903	0.76965	0.476512	0.055844	0.140521	0.0650305	0.0322976	0.0234426	0.0207528	0.0310941	0.0272592	0.0154409	0.0170754	0.0128197	0.0113044	0.0124042	0.0148986	0.0155949	0.00927519	0.00977091	0.0100781	0.00836536	0.00769902	0.00862366	0.00864885
TCGA-AR-A1AS-01Z-00-DX1.72979519-0A90-42AD-9F23-1991F75C8CE7-32-135184x65369-4224x2042.png	2042	293.836	608.789	2064.78	1065.64	2041.52	1041.84	2052.63	1053.25	2.32518	401.173	0.786025	18.356	0.991113	0.517791	0.484252	27.8279	28.1381	5.81116	2.36117	2.09872	16.0932	15.248	-0.317807	88.929	0.75599	0.457677	0.056337	0.13465	0.0645779	0.0332733	0.0234008	0.0216699	0.0310758	0.0271247	0.015953	0.0171598	0.0130184	0.011887	0.0129259	0.0148727	0.0156005	0.00973693	0.0101878	0.0100863	0.00848309	0.00806725	0.00867675	0.00874116
TCGA-AR-A1AT-01Z-00-DX1.6ED69002-2CC1-4AD4-9573-B245D7C2D060-32-120904x60158-3778x1879.png	1879	311.845	645.168	1843.47	1006.93	1818.66	983.438	1830.57	994.648	2.38549	427.278	0.784715	18.8121	0.991692	0.515073	0.471845	28.5392	28.9017	5.93006	2.39092	2.11736	16.5966	15.677	3.97418	92.4369	0.751397	0.45395	0.0563181	0.13421	0.0635739	0.033435	0.0235098	0.0217292	0.0310242	0.0270104	0.0158902	0.017207	0.0130192	0.0116595	0.0130398	0.0147614	0.0153867	0.0097596	0.0101375	0.010209	0.00836554	0.00795545	0.00865398	0.00880381
TCGA-AR-A1AU-01Z-00-DX1.F06647D1-E5A3-46FE-8537-01A10A08A4EC-32-107576x72543-3361x2266.png	2266	305.102	611.736	1655.52	1175.33	1631.92	1151.76	1643.23	1163.04	2.15095	408.377	0.782141	18.7247	0.989187	0.538271	0.514232	27.9519	28.2484	6.05077	2.45683	2.19811	16.2601	15.4174	0.0398483	87.8413	0.775474	0.475787	0.0573411	0.138893	0.066025	0.0327595	0.0237957	0.0211477	0.0311174	0.0272971	0.015579	0.0170778	0.0130499	0.0115791	0.0126393	0.0146823	0.0157151	0.00944094	0.0100061	0.0101294	0.00846742	0.00795786	0.00858272	0.00861816
TCGA-AR-A1AW-01Z-00-DX1.E527CA46-D83F-4055-8C7E-AEFEF13C1E29-32-99960x65334-3123x2041.png	2041	365.272	722.148	1245.45	1193.87	1219.14	1169.25	1231.78	1181.06	2.20059	488.268	0.767084	20.3854	0.989445	0.54081	0.496524	29.5995	30.1962	6.5908	2.61927	2.33485	18.1391	17.1128	0.848503	97.0609	0.773964	0.484407	0.0572653	0.143111	0.064268	0.0327522	0.0242223	0.0199872	0.0308287	0.0267759	0.0152909	0.0173628	0.0132957	0.0112629	0.01236	0.0147666	0.0152307	0.00925245	0.0096908	0.0101866	0.00866997	0.00749796	0.00836514	0.00844834
TCGA-AR-A1AX-01Z-00-DX1.2389D54F-545E-499E-B392-DD731834460A-32-125664x66062-3927x2064.png	2064	276.963	587.668	2688.33	1129.95	2664.76	1107.38	2676.01	1118.17	2.45181	386.684	0.79116	17.7561	0.99317	0.505397	0.466321	27.4839	27.668	5.52948	2.25734	1.9965	15.6507	14.8521	0.334909	88.2707	0.7425	0.443775	0.0566735	0.128523	0.0638776	0.034049	0.0237057	0.0221643	0.0306222	0.027134	0.016497	0.0173349	0.0130402	0.0118299	0.0132328	0.0147694	0.0159509	0.00993389	0.0103367	0.0102277	0.00846523	0.00817326	0.00889201	0.00886374
TCGA-AR-A1AY-01Z-00-DX1.6AC0BE3B-FFC5-4EDA-9E40-B18CAAC52B81-32-93296x58121-2915x1816.png	1816	346.77	702.746	1595.56	878.791	1569.89	854.086	1582.21	865.879	2.23242	467.392	0.777805	19.8828	0.989273	0.529481	0.494379	29.5863	30.0757	6.38148	2.55474	2.27256	17.4909	16.5035	-0.336701	95.0571	0.768451	0.470701	0.0569436	0.139548	0.0640617	0.0330687	0.0238192	0.0209858	0.0314779	0.0265279	0.0153634	0.0171178	0.0130043	0.0114956	0.0126166	0.0147566	0.0152859	0.00950587	0.00994287	0.0101332	0.00837411	0.00765847	0.00858704	0.00849834
TCGA-AR-A24H-01Z-00-DX1.5CFC7E16-3F38-4531-968C-A4E4C9D00659-32-128520x77402-4016x2418.png	2418	302.197	633.07	2161.8	1044.04	2136.69	1021.22	2148.76	1032.15	2.35117	414.426	0.795549	18.4803	0.989167	0.50851	0.478304	28.6968	28.8448	5.80251	2.36068	2.09317	16.0798	15.1866	-1.57583	89.976	0.751126	0.447065	0.055165	0.130593	0.0643814	0.0326493	0.0231216	0.0218475	0.0314666	0.0267641	0.0159536	0.016749	0.0128748	0.011994	0.0132218	0.0149573	0.0155633	0.00966678	0.0101658	0.0100976	0.00824928	0.00813984	0.0087091	0.00897079
TCGA-AR-A24K-01Z-00-DX1.3A56BAEC-484E-4F9B-BCB4-360ABF6DDB4B-32-131376x82657-4105x2583.png	2583	264.321	541.265	1449.66	1465.5	1427.33	1443.55	1437.99	1454.03	2.21832	357.039	0.78922	17.3905	0.993451	0.526469	0.510006	26.3508	26.5131	5.57827	2.29479	2.04491	15.0219	14.3664	2.37326	82.3956	0.768789	0.464163	0.057782	0.13314	0.0664752	0.033271	0.0234414	0.0222414	0.0308269	0.0280002	0.0160363	0.0169978	0.0129906	0.0119096	0.0130834	0.0146352	0.0160968	0.00974641	0.0101622	0.0101283	0.00845984	0.00828934	0.00900884	0.00892944
TCGA-AR-A24L-01Z-00-DX1.218A0AE1-D070-4A16-A277-31185F10724D-32-86632x63078-2707x1971.png	1971	313.601	627.695	1545.14	839.084	1520.56	816.03	1532.38	827.05	2.20177	422.086	0.772912	18.9281	0.986216	0.534106	0.502516	27.9185	28.2279	6.1033	2.46269	2.19668	16.7379	15.8614	1.94051	89.6774	0.768896	0.480749	0.0578516	0.137905	0.0653642	0.0332696	0.0243013	0.0203175	0.0306677	0.0270262	0.0156303	0.0173228	0.0132904	0.0115832	0.0125518	0.0145784	0.0156765	0.00941311	0.0100086	0.0102602	0.00862438	0.0078793	0.00861415	0.00857668
TCGA-AR-A24M-01Z-00-DX1.D81F1BDF-00DD-42A3-AFFE-55655A877213-32-124712x73796-3897x2306.png	2306	309.348	617.674	1614.13	1283.53	1589.74	1260.49	1601.43	1271.49	2.13136	412.179	0.7845	18.8478	0.991608	0.538645	0.514286	28.1159	28.4421	6.09705	2.47317	2.21274	16.306	15.4563	-2.00872	88.0488	0.777589	0.473527	0.0567408	0.13944	0.0662844	0.0328972	0.023171	0.0215024	0.0313981	0.027479	0.0155443	0.0169124	0.0129869	0.0114465	0.012612	0.0147768	0.0156283	0.00939814	0.00993434	0.0100095	0.00837701	0.00783889	0.00860049	0.00859043
TCGA-AR-A24N-01Z-00-DX1.563E9160-9E09-4E3F-8CE9-FFED0AA52927-32-135184x67838-4224x2119.png	2119	317.488	636.091	2397.4	1094.72	2373.14	1070.91	2384.78	1082.32	2.16054	424.233	0.780928	19.0863	0.990715	0.535701	0.508381	28.2982	28.7267	6.17	2.49065	2.22479	16.642	15.7566	-1.71027	89.7852	0.774866	0.473997	0.0572568	0.139724	0.0656026	0.0329835	0.0237738	0.0213413	0.0311825	0.0271844	0.0156182	0.0171336	0.0129896	0.0115276	0.0125574	0.0147091	0.0155381	0.00935663	0.00993113	0.0101507	0.00847564	0.00779201	0.00858078	0.00854729
TCGA-AR-A24O-01Z-00-DX1.04EFBAC8-7A4A-4005-890C-5CC3E1C67DBD-32-99960x58094-3123x1815.png	1815	311.912	626.368	1608.6	918.382	1583.58	895.562	1595.61	906.461	2.18118	418.62	0.783383	18.9279	0.989665	0.532723	0.504479	28.296	28.6174	6.0923	2.46389	2.20128	16.4859	15.6325	-3.64582	89.3026	0.77125	0.469914	0.0569227	0.138136	0.0655929	0.0334176	0.0234241	0.0211849	0.0314213	0.0272725	0.0156811	0.0169555	0.0131235	0.0114889	0.0126305	0.0147177	0.0156515	0.00943393	0.00995438	0.0101004	0.00852114	0.00785157	0.00869074	0.00862231
TCGA-AR-A24P-01Z-00-DX1.08BE8830-C55E-4E2B-9378-371A670C75FD-32-140896x72422-4403x2263.png	2263	305.218	632.363	1805.35	1094.89	1780.48	1071.85	1792.41	1082.87	2.22656	411.576	0.792471	18.6837	0.991962	0.520506	0.499188	28.5475	28.8322	5.97834	2.42561	2.16045	16.0913	15.2579	3.643	88.791	0.766838	0.456182	0.0559285	0.135108	0.0653179	0.0331281	0.0228941	0.0222403	0.0314019	0.02746	0.0159577	0.0170048	0.0125946	0.0118457	0.0129328	0.0147979	0.015662	0.00952225	0.0101165	0.00995752	0.00820165	0.00791901	0.00868565	0.00869199
TCGA-AR-A24Q-01Z-00-DX1.69DC7E35-DC0D-4F20-88DA-04C25F28628C-32-124711x77013-3897x2406.png	2406	301.633	627.564	1920.67	1281.62	1896.13	1258.59	1907.91	1269.6	2.54344	421.29	0.778952	18.4791	0.992572	0.508978	0.451954	27.853	28.2665	5.76284	2.31934	2.03868	16.6572	15.7321	1.00417	93.5235	0.737333	0.453799	0.0570114	0.132032	0.062886	0.0337879	0.0238735	0.0215139	0.0302537	0.0265748	0.0162115	0.0174745	0.0132782	0.0117362	0.0131004	0.0145987	0.0153705	0.00981356	0.0103166	0.01037	0.00865582	0.0082403	0.00893372	0.00896307
TCGA-AR-A24R-01Z-00-DX1.47D79205-63E7-43E6-A513-2CD10DFA53C9-32-106623x65505-3331x2047.png	2047	320.283	641.294	1484.94	1082.08	1461.39	1057.42	1472.67	1069.21	2.15002	427.463	0.783014	19.1591	0.989392	0.536848	0.510472	28.4816	28.8467	6.16928	2.49603	2.23456	16.6419	15.7652	3.74991	90.0072	0.776954	0.474584	0.0570132	0.139762	0.0663423	0.0329584	0.0235436	0.0212217	0.0315165	0.0273387	0.015464	0.0171225	0.0130094	0.0116127	0.0126763	0.0147497	0.015601	0.00943542	0.00993119	0.0100999	0.00834989	0.00776707	0.0086208	0.00847801
TCGA-AR-A24S-01Z-00-DX1.317C3B19-0D0F-4315-AC2D-C741F09DD775-32-99959x73680-3123x2302.png	2302	326.307	651.879	1036.21	1114.66	1011.84	1090.27	1023.52	1101.94	2.15118	435.357	0.784696	19.3379	0.992436	0.533985	0.510284	28.7716	29.2016	6.27579	2.53258	2.25521	16.8488	15.9262	0.038552	90.4481	0.773992	0.470344	0.0575844	0.139568	0.0655419	0.0331154	0.0232351	0.0212031	0.0313254	0.0272233	0.0155921	0.0170295	0.0127686	0.0117849	0.0125099	0.0145779	0.0153887	0.0094122	0.00981921	0.0099813	0.00830312	0.00763528	0.00862392	0.0084475
TCGA-AR-A24T-01Z-00-DX1.3B325D54-38EC-4E16-BDE1-628894CC15AA-32-137087x84739-4283x2648.png	2648	271.55	580.547	1507.21	1246.72	1483.84	1224.08	1495.05	1234.88	2.58475	382.117	0.790965	17.5922	0.994216	0.496887	0.446596	27.3248	27.5375	5.40958	2.20834	1.9344	15.611	14.7964	-1.19908	89.2836	0.729725	0.43822	0.0557229	0.127357	0.0627442	0.0337045	0.0234098	0.0221652	0.0305155	0.0266873	0.0164114	0.0172999	0.0130392	0.0119861	0.0132322	0.0147312	0.0156121	0.0100372	0.0103403	0.0102824	0.00851471	0.00813253	0.00903148	0.00901882
TCGA-AR-A24U-01Z-00-DX1.220FD0D0-0DB6-4E3C-92A0-66CD6509F0AD-32-111383x65843-3480x2057.png	2057	316.337	645.846	1309.88	992.322	1285.3	968.611	1297.12	979.977	2.26777	431.575	0.777795	18.9748	0.990851	0.525812	0.493882	28.427	28.7741	6.07441	2.44711	2.17769	16.7832	15.8543	1.0099	91.2089	0.760514	0.468534	0.0573667	0.135615	0.0641376	0.0333755	0.0241877	0.0214308	0.0304366	0.0271678	0.0158096	0.0173623	0.0133372	0.0117992	0.0127157	0.0148307	0.015643	0.00955111	0.0101705	0.0102457	0.00853587	0.00808079	0.00865246	0.008679
TCGA-AR-A24V-01Z-00-DX1.E749C2FE-E26B-4306-80B4-8269EEB23270-32-76159x58718-2379x1834.png	1834	255.238	544.368	1112.98	855.803	1090.06	834.157	1101.03	844.523	2.57272	359.619	0.798102	16.9898	0.99511	0.495334	0.448618	26.7662	26.8098	5.20067	2.14656	1.87685	14.9909	14.2669	-0.201731	85.7303	0.726238	0.429735	0.055745	0.123642	0.0635445	0.0339085	0.0231504	0.0225957	0.0302043	0.0273654	0.0167402	0.0173588	0.0130002	0.0119924	0.0137615	0.0146122	0.0159598	0.0102609	0.0106271	0.0103075	0.00852796	0.0084417	0.00924289	0.00916328
TCGA-AR-A24W-01Z-00-DX1.0663B4A3-6475-4981-91F0-20D2C79CBF89-32-102815x58780-3212x1836.png	1836	336.876	696.05	1526.58	905.945	1499.95	882.191	1512.79	893.585	2.22882	452.763	0.797179	19.6392	0.991468	0.521886	0.49612	30.0977	30.5029	6.27882	2.52726	2.2529	16.8275	15.9064	-1.16102	93.6297	0.770095	0.451548	0.057143	0.135669	0.0645787	0.034285	0.0224692	0.0222408	0.0318762	0.0268057	0.0160955	0.0168388	0.012424	0.011609	0.0127404	0.0148004	0.0152801	0.00950551	0.00999593	0.00975988	0.00797645	0.00768592	0.00842496	0.0085024
TCGA-AR-A24X-01Z-00-DX1.304BF142-B01A-4AE9-B98C-FB3DE3BEAE57-32-58071x46228-1814x1444.png	1444	328.153	648.402	901.782	683.411	877.187	659.322	888.986	670.888	2.13773	436.352	0.779	19.428	0.986969	0.539107	0.510512	28.6594	29.1108	6.29977	2.53496	2.26413	16.944	16.0242	-1.01626	90.9166	0.777231	0.476122	0.0564897	0.141595	0.0649902	0.0330566	0.0232905	0.0213947	0.0310938	0.0273972	0.0155164	0.0170062	0.0127219	0.0115737	0.0124206	0.0147281	0.0158276	0.00932943	0.00981786	0.0101562	0.00822221	0.00759034	0.00855689	0.00843341
TCGA-AR-A24Z-01Z-00-DX1.C88AFF18-A8E4-426A-BEA3-70566DE39C46-32-62831x53610-1963x1675.png	1675	334.643	652.124	1148.17	1016.36	1123.7	992.176	1135.45	1003.76	2.08304	441.274	0.766975	19.6243	0.989756	0.545901	0.520668	28.2427	28.7395	6.45369	2.58994	2.30328	17.3407	16.4224	2.53566	90.6485	0.784267	0.49259	0.0584289	0.143881	0.0655855	0.0325291	0.0243481	0.0211964	0.0302555	0.0267996	0.0148121	0.0170901	0.0136072	0.0113487	0.012354	0.0143993	0.0154395	0.00926523	0.00943489	0.0101776	0.00839723	0.00771324	0.00845551	0.00840279
TCGA-AR-A250-01Z-00-DX1.572A2F73-6BF5-4932-BFEF-4B8904755ACF-32-103767x72052-3242x2251.png	2251	326.096	640.669	1482.3	1202.95	1457.88	1179.24	1469.61	1190.59	2.11139	432.659	0.767578	19.3446	0.989121	0.544582	0.51683	28.0357	28.4262	6.30113	2.53959	2.27153	17.0823	16.1903	-1.15998	90.0423	0.780743	0.492243	0.0576016	0.142365	0.0658823	0.0323166	0.0245369	0.0201764	0.0310922	0.0270695	0.0152279	0.0172328	0.0134659	0.0113313	0.0123609	0.0144778	0.0153541	0.00922804	0.0098532	0.0101684	0.00869589	0.00765537	0.00851139	0.00849232
TCGA-AR-A251-01Z-00-DX1.E91E357A-3AD4-4F79-A698-05F0B21A37EC-32-102815x60746-3212x1898.png	1898	325.17	653.325	1616.39	989.484	1591.65	965.669	1603.56	977.089	2.19488	435.981	0.77871	19.2685	0.987921	0.534859	0.504892	28.5144	28.9271	6.22449	2.50659	2.2374	16.8921	15.9783	1.45887	91.2432	0.772092	0.477352	0.0569261	0.139893	0.0656253	0.0324688	0.0234368	0.0211213	0.0309589	0.0270324	0.0154729	0.0169734	0.0131415	0.0115698	0.0126437	0.0147202	0.0154186	0.00946132	0.00995534	0.0101515	0.00841011	0.00784692	0.00872095	0.00864034
TCGA-AR-A252-01Z-00-DX1.2E7EE069-A0B8-489B-A2F0-3175FB58F468-32-145655x72802-4551x2275.png	2275	330.378	671.536	1676.62	1311.4	1652.08	1286.72	1663.84	1298.56	2.24965	446.643	0.773346	19.3858	0.98995	0.52566	0.49416	28.7645	29.218	6.25023	2.50601	2.22537	17.1991	16.2346	0.816135	92.6831	0.763492	0.472667	0.0574537	0.13792	0.0638228	0.0329287	0.0241151	0.0208808	0.030461	0.0268238	0.0155113	0.0172762	0.013092	0.0118175	0.012556	0.0147559	0.0153256	0.00942129	0.00994533	0.0101968	0.00855082	0.00785791	0.0086217	0.00866098
TCGA-AR-A254-01Z-00-DX1.EA5CD008-1106-41EC-998A-04EF08EEEC9D-32-102815x66971-3212x2092.png	2092	329.308	646.796	1437.48	873.738	1413.52	849.283	1424.98	861.026	2.12341	436.253	0.772492	19.4381	0.988766	0.543329	0.513959	28.2845	28.7003	6.34242	2.55033	2.2786	17.097	16.1897	2.1412	90.5816	0.77945	0.486576	0.0579629	0.142146	0.0660241	0.0327824	0.0241886	0.0202419	0.0310742	0.0270756	0.0153825	0.0172421	0.0132807	0.0113491	0.0122818	0.014586	0.0154293	0.00932847	0.0098566	0.010077	0.00861652	0.00761682	0.00853245	0.00851188
TCGA-AR-A255-01Z-00-DX1.E67C081D-50C9-451C-814B-F097B2671300-32-51407x59645-1606x1863.png	1863	326.473	675.758	660.654	814.775	635.366	790.762	647.569	802.267	2.32391	447.554	0.785405	19.2156	0.988701	0.513641	0.479426	28.9796	29.4727	6.12914	2.45438	2.17041	17.0361	16.0691	0.438685	93.4	0.753085	0.45355	0.0567846	0.134606	0.0636866	0.0345178	0.023063	0.0214191	0.0312555	0.026872	0.016384	0.0166867	0.0128421	0.0111576	0.0129772	0.0152901	0.0155541	0.00972552	0.0101411	0.0100509	0.00836029	0.00791019	0.00863859	0.00887412
TCGA-AR-A256-01Z-00-DX1.950D4546-4BF4-4380-9877-51D86A93D755-32-87583x65789-2736x2055.png	2055	311.765	639.32	1255.01	989.834	1230.33	966.389	1242.15	977.577	2.22694	420.893	0.784093	18.8698	0.990237	0.524256	0.498881	28.4854	28.8205	6.05479	2.44996	2.18449	16.4297	15.5774	4.25733	89.6458	0.764666	0.463671	0.0566551	0.136151	0.064608	0.0332903	0.0234285	0.0216511	0.0309118	0.0270942	0.0157313	0.0169105	0.0130206	0.0117107	0.0128947	0.0149141	0.0155092	0.00961187	0.00988944	0.0100893	0.00838892	0.007837	0.00863158	0.0086425
TCGA-AR-A2LE-01Z-00-DX1.E8E1FC5C-9A4A-463F-81D7-E9A8AF43EAD9-32-76159x46268-2379x1445.png	1445	338.158	670.316	1295.28	722.056	1270.05	697.902	1282.18	709.469	2.15946	451.37	0.776551	19.7026	0.989001	0.539954	0.506257	28.9634	29.3838	6.37652	2.55825	2.28478	17.2854	16.3463	3.02756	92.7692	0.775516	0.480926	0.0580139	0.140586	0.0658141	0.0330651	0.0238939	0.0206435	0.0314172	0.0268355	0.0154343	0.0170363	0.0132657	0.0115574	0.0125993	0.0147071	0.015219	0.00920917	0.0100327	0.010183	0.0086116	0.00784635	0.00864153	0.00859458
TCGA-AR-A2LH-01Z-00-DX1.40D4FD67-FB13-46D9-A202-56A5791EA11C-32-139943x65089-4373x2034.png	2034	250.097	549.234	2100.99	979.776	2077.66	958.179	2088.81	968.482	2.7211	362.774	0.799524	16.8934	0.995584	0.481637	0.423452	26.9062	26.9993	5.08679	2.08929	1.82033	15.1282	14.3024	-3.01781	88.0918	0.70877	0.419811	0.0552446	0.121859	0.0621364	0.0347038	0.0229329	0.0224562	0.0304197	0.0268853	0.017024	0.0173551	0.0129736	0.012179	0.013743	0.0148136	0.0158233	0.0103429	0.0107196	0.0104002	0.00863556	0.00860324	0.0091499	0.00940237
TCGA-AR-A2LJ-01Z-00-DX1.9D6257FA-2767-4640-9252-9BE18BD9D158-32-124711x67676-3897x2114.png	2114	344.694	699.129	2140.19	1072.47	2114.35	1048.04	2126.76	1059.77	2.23476	465.369	0.778739	19.8349	0.990374	0.527512	0.492601	29.456	29.9087	6.36739	2.54767	2.26878	17.5167	16.4946	3.29395	94.8067	0.76615	0.470471	0.0568861	0.138999	0.0648548	0.0331142	0.0237732	0.0212065	0.0312907	0.0269276	0.0155366	0.0171472	0.0130679	0.0115748	0.0127122	0.0149333	0.0153122	0.00946342	0.0100194	0.0101595	0.00850948	0.00758931	0.00844614	0.00850853
TCGA-AR-A2LK-01Z-00-DX1.FBD59C38-CD4E-4C22-BC74-A57C192A9BBC-32-71399x68865-2231x2152.png	2152	329.074	662.137	1167.89	938.605	1143.25	914.312	1155.06	925.927	2.20313	442.537	0.778943	19.3938	0.990299	0.53493	0.500344	28.8499	29.2531	6.22489	2.50544	2.24101	17.0086	16.0859	2.77683	92.1733	0.77111	0.473416	0.0569666	0.139131	0.065238	0.032934	0.0235162	0.0208381	0.0313093	0.0271576	0.015664	0.0170587	0.0130508	0.0113959	0.0126156	0.0149706	0.0155223	0.00930331	0.00997627	0.0100821	0.00862165	0.00782566	0.00855176	0.00875469
TCGA-AR-A2LL-01Z-00-DX1.F0AF890C-2B34-4758-A929-58AAFF593EC5-32-130423x74897-4075x2340.png	2340	256.658	569.274	2261.65	1335.46	2237.81	1313.58	2249.2	1324	2.66975	367.128	0.806954	17.1061	0.991988	0.482119	0.434445	27.6499	27.7897	5.18094	2.12634	1.8611	14.9406	14.1472	8.46222	88.3646	0.720461	0.414179	0.054496	0.12265	0.0617517	0.0340656	0.0222015	0.0233338	0.0306076	0.0265961	0.016788	0.0170329	0.0124653	0.0121203	0.0135884	0.0148768	0.0156176	0.0101672	0.010543	0.0101768	0.00829648	0.00854365	0.00906322	0.00932583
TCGA-AR-A2LM-01Z-00-DX1.CB64A062-2E35-41F9-97C7-07BB60754799-32-133279x87843-4164x2745.png	2745	329.602	669.7	1650.8	1337.95	1625.76	1313.61	1637.77	1325.28	2.20195	442.351	0.786327	19.4599	0.98964	0.530442	0.500833	29.2656	29.687	6.25006	2.51617	2.24552	16.8648	15.9588	0.492058	92.3166	0.772504	0.465264	0.0563284	0.138805	0.0649649	0.0330478	0.0231527	0.0218419	0.0315943	0.0271127	0.0156274	0.0168795	0.0127232	0.011625	0.0127082	0.0148834	0.0154051	0.0094232	0.00982076	0.00999676	0.0082722	0.00771909	0.00849398	0.00848155
TCGA-AR-A2LN-01Z-00-DX1.3EF43524-28B8-4326-9356-6BCBC63A1DA8-32-132327x91937-4135x2873.png	2873	331.16	694.825	1350.5	1543.22	1325.44	1517.99	1337.45	1530.07	2.25605	446.61	0.809914	19.4185	0.990499	0.517152	0.491306	30.5523	30.8082	6.13011	2.48108	2.21097	16.3361	15.4225	1.50924	93.1372	0.766698	0.439336	0.0539733	0.133295	0.0653906	0.0331372	0.0216785	0.0232147	0.0326004	0.0272555	0.0161485	0.0164363	0.0120552	0.0118752	0.0131072	0.0151135	0.0155507	0.00954871	0.0099054	0.00978492	0.00795133	0.00784674	0.00858088	0.00874118
TCGA-AR-A2LO-01Z-00-DX1.A8C81E1E-B224-4CF4-83D4-FFB2F51A7002-32-109479x65839-3421x2057.png	2057	301.249	617.958	1821.15	1214.81	1796.74	1191.86	1808.46	1202.84	2.28325	409.667	0.787473	18.5326	0.989128	0.520807	0.488472	28.0742	28.3128	5.87999	2.39108	2.1269	16.2055	15.3127	-6.01027	89.1524	0.759254	0.460358	0.0560969	0.13494	0.0647702	0.0328173	0.023148	0.0218016	0.0312823	0.0274316	0.0158581	0.0169791	0.0130068	0.0118137	0.0129888	0.0148903	0.0156122	0.00962403	0.0100328	0.0101682	0.00842443	0.00801787	0.00868525	0.00887396
TCGA-AR-A2LQ-01Z-00-DX1.2F579E62-69A8-40F4-A516-542C7C808628-32-85679x72173-2677x2255.png	2255	331.608	672.595	1186.42	1015.97	1160.54	992.52	1172.96	1003.74	2.26774	449.846	0.778344	19.4337	0.987598	0.527544	0.489747	29.0505	29.4174	6.20323	2.49365	2.21907	17.1755	16.1796	-5.07348	93.3845	0.761792	0.470142	0.0563421	0.137701	0.0647217	0.0326147	0.0236048	0.0207266	0.0310756	0.0270423	0.0156067	0.0170902	0.0130642	0.0116533	0.0127095	0.0148394	0.0154626	0.00947388	0.0099579	0.0101455	0.00850704	0.00793288	0.00849139	0.00866353
TCGA-AR-A2LR-01Z-00-DX1.C686A7D6-0361-49EE-B6CA-672B3086243C-32-129471x68015-4045x2125.png	2125	273.976	596.338	1950.83	1097.57	1926.98	1074.82	1938.38	1085.71	2.53364	387.227	0.800259	17.6509	0.994356	0.491004	0.449893	27.8912	28.1193	5.438	2.22018	1.94715	15.5062	14.6522	-0.170826	89.0471	0.72928	0.425998	0.0558382	0.125522	0.0625093	0.0345394	0.0229168	0.023006	0.0309084	0.0266319	0.0168025	0.0172261	0.0128123	0.012078	0.0134904	0.0147673	0.0155803	0.0100467	0.0104551	0.0102855	0.00829809	0.00833446	0.00898684	0.00907281
TCGA-AR-A5QM-01Z-00-DX1.A9017CED-FF57-4090-95B9-94DC91854347-32-111383x66008-3480x2062.png	2062	322.756	670.459	1943.66	927.063	1917.96	903.428	1930.3	914.752	2.2844	441.669	0.790019	19.2081	0.987329	0.518975	0.486334	29.3542	29.6233	6.08832	2.45567	2.18956	16.8015	15.8089	8.84656	92.6201	0.75689	0.45705	0.0558601	0.134774	0.0646095	0.0331982	0.0232136	0.0215494	0.0313468	0.0270289	0.0157934	0.0174076	0.01287	0.0116386	0.0127732	0.0149985	0.0154842	0.00946089	0.00993868	0.0102615	0.00831529	0.00774496	0.00861094	0.00863802
TCGA-AR-A5QN-01Z-00-DX1.BF92AA24-3D44-4FFA-BCC0-CDB934EC3BBC-32-95199x59254-2974x1851.png	1851	352.177	717.475	1497.85	975.767	1471.44	951.481	1484.16	963.12	2.30703	481.127	0.779539	19.978	0.986048	0.530099	0.483561	29.8742	30.3238	6.33233	2.52856	2.24636	17.6726	16.6232	1.6699	97.4357	0.763046	0.469143	0.0561129	0.138448	0.0648013	0.0329012	0.0235441	0.0211528	0.0313734	0.0268886	0.0154693	0.0171205	0.0128935	0.0115968	0.012633	0.0149896	0.0153059	0.00937723	0.0100308	0.010131	0.00845269	0.00768902	0.00856268	0.0086783
TCGA-AR-A5QP-01Z-00-DX1.256FDB13-1F81-42DA-AF6E-8A94835550C1-32-108527x70423-3391x2200.png	2200	334.829	683.138	1598.54	1315.24	1573.11	1291.04	1585.28	1302.64	2.25634	453.654	0.782672	19.5222	0.989101	0.526648	0.489652	29.2778	29.6921	6.22552	2.49918	2.22425	17.1574	16.1768	1.13542	93.848	0.764657	0.465512	0.0569393	0.137156	0.0645911	0.0334208	0.023485	0.0214828	0.0313752	0.0269843	0.015661	0.0171485	0.0129885	0.0115617	0.0127119	0.0149065	0.0156136	0.00936152	0.0100185	0.0101084	0.00832613	0.00794805	0.00855727	0.00864647
TCGA-AR-A5QQ-01Z-00-DX1.4185D6D2-498E-4E71-8CB3-EDB4739C6229-32-128519x87015-4016x2719.png	2719	321.517	667.327	2164.24	1368.34	2139.16	1344.37	2151.24	1355.82	2.44131	444.878	0.775749	19.1146	0.990566	0.514257	0.462915	28.6352	29.1278	6.01495	2.40817	2.12771	17.1412	16.1589	-4.05364	95.2208	0.7465	0.459875	0.0565184	0.135555	0.0626549	0.0336037	0.0238674	0.0214309	0.030616	0.0264876	0.0157681	0.0176117	0.01317	0.011695	0.0130127	0.0147464	0.0153547	0.00961218	0.0102012	0.0103295	0.00855686	0.00805619	0.00867443	0.00871739
TCGA-B6-A0I1-01Z-00-DX1.86BEC5E4-A2D1-4039-8D08-0598FA8BCC2B-32-113288x87165-3540x2723.png	2723	312.973	650.395	1809.1	1278.84	1784.49	1255.04	1796.31	1266.43	2.43601	430.653	0.786012	18.8102	0.990163	0.513142	0.466338	28.6632	28.9504	5.90257	2.37834	2.10184	16.6347	15.7339	-0.563835	93.3616	0.749522	0.452856	0.0570341	0.132088	0.0638829	0.0337205	0.0235045	0.0215962	0.030922	0.0266442	0.0160526	0.0172817	0.0130188	0.0118831	0.0130618	0.0145701	0.0152943	0.00987534	0.010224	0.0101727	0.00850339	0.008088	0.0087427	0.00883669
TCGA-B6-A0I2-01Z-00-DX1.885D2034-73B7-48AE-8343-631F89061C38-32-84267x75920-2633x2372.png	2372	307.236	636.28	1380.94	1277.61	1355.53	1254.72	1367.74	1265.65	2.27287	414.784	0.797274	18.737	0.990764	0.523958	0.496136	29.2404	29.5128	5.94536	2.41669	2.15218	15.9023	15.0931	1.13799	89.9502	0.767917	0.449004	0.0548809	0.133361	0.0642009	0.0326095	0.0225992	0.0229462	0.0311176	0.0270589	0.0157928	0.016708	0.0125652	0.0117961	0.0129631	0.0148237	0.0154899	0.00952001	0.00992746	0.00990453	0.00811222	0.00794189	0.00869436	0.00867764
TCGA-B6-A0I5-01Z-00-DX1.47A30509-4BA0-4BA5-AD9B-F2C2DB701159-32-116825x78785-3650x2462.png	2462	253.186	545.362	2168.58	1267.14	2145.04	1245.87	2156.29	1256.03	2.3264	348.605	0.815416	17.0604	0.995223	0.506828	0.490972	27.5538	27.4598	5.33681	2.21802	1.97303	14.2936	13.6534	-1.77181	82.4073	0.756495	0.428152	0.0554672	0.125016	0.0657219	0.0338384	0.0222271	0.0238272	0.0314147	0.0278334	0.0165754	0.0166313	0.01234	0.0123507	0.0136336	0.0147988	0.0158954	0.0100241	0.0101219	0.00981146	0.00810037	0.00826323	0.00896585	0.00894303
TCGA-B6-A0I6-01Z-00-DX1.D597D207-BEB2-4CE5-B315-FE7AD6E9C30B-32-150341x83689-4698x2615.png	2615	335.581	677.299	2311.1	1288.36	2285.34	1264.67	2297.71	1276.02	2.21685	451.447	0.77835	19.5339	0.990928	0.530619	0.501079	29.0341	29.5155	6.31637	2.53325	2.25135	17.18	16.2487	-4.36661	92.842	0.769346	0.470182	0.0574256	0.138282	0.0641349	0.0332345	0.0235661	0.0211699	0.0309325	0.0267968	0.0157556	0.0171308	0.0129995	0.0116723	0.0128147	0.0146912	0.0153305	0.00946421	0.00990144	0.010127	0.0083505	0.00779528	0.00850971	0.00864976
TCGA-B6-A0I9-01Z-00-DX1.78E1D43A-507E-482E-B988-AF13B12B4497-32-144595x93675-4518x2927.png	2927	339.156	667.618	2356.67	1406.81	2331.78	1382.55	2343.71	1394.18	2.17895	452.767	0.766905	19.7047	0.98966	0.541523	0.503724	28.6211	29.0911	6.39139	2.55961	2.28249	17.508	16.5469	0.571253	93.0208	0.774405	0.487071	0.0581127	0.141405	0.0648566	0.0328275	0.0244305	0.0203846	0.0307873	0.0269202	0.0153245	0.0171867	0.0134125	0.0114671	0.01239	0.014562	0.0153535	0.00923881	0.00982611	0.0102551	0.00866251	0.00772855	0.00856007	0.0085015
TCGA-B6-A0IA-01Z-00-DX1.8A868F0A-6CE2-46A7-AF0C-C5FC5D657D86-32-129274x93761-4039x2930.png	2930	246.481	515.69	2117.12	1372.42	2094.5	1351.4	2105.31	1361.4	2.35518	338.813	0.797754	16.8531	0.995424	0.511135	0.485201	26.3114	26.3198	5.29203	2.19441	1.94408	14.5565	13.9278	1.94879	81.6522	0.750188	0.443125	0.057458	0.12634	0.0651418	0.0343002	0.0234713	0.0225968	0.0306629	0.0277946	0.0167169	0.016959	0.0129539	0.012154	0.0134707	0.0146527	0.0160962	0.0100974	0.0102942	0.0101981	0.00846164	0.00841134	0.0090888	0.00915587
TCGA-B6-A0IB-01Z-00-DX1.BAA1D655-1B80-49E2-B1EB-2ECC83DED989-32-93131x71698-2910x2240.png	2240	296.135	649.15	1543.34	1264.54	1520.42	1238.74	1531.41	1251.14	2.49932	409.205	0.815388	18.3434	0.992167	0.500096	0.461146	29.9645	30.0821	5.64349	2.30189	2.04205	15.4276	14.632	-4.14437	91.6738	0.747992	0.418128	0.0521898	0.126561	0.0633852	0.0323972	0.0212491	0.0237249	0.0316385	0.0270717	0.0159416	0.0164069	0.011751	0.0118584	0.0133956	0.0149522	0.0156236	0.00960468	0.00998966	0.00963216	0.00781892	0.00808437	0.00877219	0.00894547
TCGA-B6-A0IE-01Z-00-DX1.E6C4E5C0-338C-481D-B691-0385E8D090B1-32-123528x83594-3860x2612.png	2612	325.542	664.513	1905.01	1261.85	1880.11	1237.63	1892.07	1249.23	2.27823	441.267	0.78912	19.2722	0.989355	0.526355	0.486772	29.2145	29.5787	6.1177	2.46403	2.19901	16.7663	15.8407	-0.398181	92.9791	0.764401	0.459123	0.0562856	0.13658	0.0649354	0.033301	0.0228932	0.0217319	0.0316581	0.0269584	0.015704	0.0171275	0.012727	0.0116661	0.0128441	0.0148533	0.0154871	0.00945668	0.010031	0.010142	0.00838815	0.00782556	0.00859994	0.00865322
TCGA-B6-A0IG-01Z-00-DX1.4238CB6E-0561-49FD-9C49-9B8AEAFC4618-32-132147x93747-4129x2929.png	2929	320.322	652.326	2334.06	1842.58	2309.89	1818.03	2321.46	1829.79	2.24056	432.878	0.787367	19.1548	0.989933	0.528703	0.495702	28.9277	29.3151	6.13201	2.47157	2.20582	16.6492	15.7499	1.61404	91.587	0.767726	0.462458	0.0571958	0.136888	0.0648581	0.0335438	0.0231277	0.0217183	0.0313223	0.0270461	0.015687	0.0169571	0.0127062	0.0116624	0.0128298	0.014857	0.0153883	0.00952053	0.00990835	0.0100337	0.00830323	0.0078255	0.00855282	0.00865874
TCGA-B6-A0IH-01Z-00-DX1.3463B12E-D1B0-4FB2-B257-BFD63BA2B6BF-32-123759x85528-3867x2672.png	2672	322.415	671.001	1636.29	1105.03	1610.34	1081.59	1622.81	1092.8	2.3251	438.46	0.79925	19.1701	0.989906	0.517408	0.481748	29.6238	29.9524	6.05052	2.44224	2.17113	16.4955	15.5716	-4.87202	93.0974	0.7605	0.446719	0.0551967	0.134126	0.0647274	0.0334341	0.0221406	0.0223092	0.0318016	0.0269458	0.0160448	0.0167671	0.0124114	0.0117932	0.0129861	0.0148665	0.0154643	0.00954298	0.00996859	0.010016	0.00798364	0.00786014	0.00857407	0.00859813
TCGA-B6-A0IJ-01Z-00-DX1.BF2E062F-06DA-4CA8-86C4-36674C035CAA-32-102461x35513-3201x1109.png	1109	347.008	672.198	1500.54	417.345	1473.39	394.802	1486.51	405.568	2.18497	458.601	0.790118	19.845	0.994126	0.550298	0.504597	29.8847	30.4233	6.46135	2.58226	2.29506	16.9111	16.1123	-4.9582	93.8133	0.780307	0.462191	0.0583226	0.138905	0.0649652	0.0333803	0.0224776	0.0219022	0.0311929	0.0264524	0.0155305	0.0164555	0.0129006	0.0119097	0.0127798	0.0145999	0.0153979	0.00935915	0.00998189	0.00989564	0.00821314	0.00783237	0.00844208	0.00865092
TCGA-B6-A0IK-01Z-00-DX1.1640DB44-4AC0-4A34-9E21-4673C4289A99-32-97673x72522-3052x2266.png	2266	318.003	680.619	1446.65	1193.2	1422.86	1167.16	1434.25	1179.64	2.36639	436.46	0.804694	19.05	0.992248	0.509611	0.476484	30.2836	30.5189	5.963	2.41305	2.14838	16.1909	15.2808	5.10629	93.3033	0.755465	0.43603	0.0543396	0.130357	0.0637013	0.0329038	0.0223956	0.0227878	0.0317549	0.0267571	0.0160978	0.0166923	0.0122617	0.0120662	0.0132224	0.0148961	0.0152772	0.00957917	0.00998503	0.00986167	0.00797703	0.00803286	0.00863949	0.00880798
TCGA-B6-A0IM-01Z-00-DX1.E2CBD42F-D933-4446-BE7C-C2F8B5AFB976-32-138850x93704-4339x2928.png	2928	233.949	558.374	2336.38	1396.05	2313.85	1373.27	2324.63	1384.14	2.88256	352.261	0.821421	16.4157	0.995966	0.464002	0.420759	28.131	27.7538	4.81251	2.0017	1.74599	14.399	13.7322	1.13708	87.976	0.700459	0.391305	0.0540343	0.109831	0.0624231	0.034399	0.0218969	0.0235	0.0301111	0.0269674	0.0175832	0.0169036	0.012202	0.0127128	0.0140914	0.0145281	0.0156758	0.0105499	0.0107211	0.0101059	0.00792837	0.00888634	0.00940415	0.00936231
TCGA-B6-A0IN-01Z-00-DX1.5C1CBEF7-0C4A-4B22-A85B-6F6FD9435573-32-135977x93725-4249x2928.png	2928	282.735	604.72	2343.54	1368.31	2319.37	1345.62	2330.94	1356.47	2.45065	393.356	0.799618	17.9024	0.994315	0.499132	0.463643	27.9977	28.2435	5.56959	2.27236	2.00632	15.6058	14.7717	5.14689	88.8913	0.741394	0.434656	0.0552958	0.128322	0.0633777	0.0337889	0.0227159	0.0228306	0.0309941	0.0269036	0.0164149	0.0171304	0.0125624	0.0119714	0.0134093	0.0147929	0.0155799	0.0099275	0.0103051	0.0101265	0.00830561	0.00820121	0.00888807	0.00895889
TCGA-B6-A0IO-01Z-00-DX1.D8898C30-4016-4983-9359-5C1507C01715-32-108207x73484-3381x2296.png	2296	270.992	634.387	1045.39	1103.8	1020.79	1080.63	1032.55	1091.73	2.65171	395.604	0.807663	17.5802	0.993623	0.48431	0.456975	29.502	29.1327	5.39548	2.21979	1.95491	15.3608	14.6106	5.00848	89.1858	0.724975	0.419257	0.0529745	0.121531	0.062278	0.0321661	0.0221292	0.0219133	0.0299839	0.0263618	0.0162605	0.0165507	0.0121981	0.0120554	0.0130751	0.014316	0.0153402	0.0098031	0.00999838	0.00973359	0.00807783	0.00811504	0.00877581	0.00876551
TCGA-B6-A0IP-01Z-00-DX1.3723A250-AA4B-4AFE-A692-C1311E9BA268-32-118740x81330-3710x2541.png	2541	293.123	612.09	2073.61	916.071	2048.28	893.955	2060.47	904.497	2.3367	398.158	0.806229	18.2944	0.991209	0.51425	0.480906	28.7513	29.0147	5.76031	2.34531	2.08141	15.5001	14.7047	-1.91885	88.899	0.75932	0.436876	0.0547565	0.131486	0.064321	0.0330369	0.0220937	0.023419	0.0315015	0.0271088	0.0161455	0.0167169	0.0121587	0.0118325	0.0133056	0.0149706	0.0155282	0.00963903	0.0100094	0.00992189	0.00809503	0.00809152	0.00873751	0.00886111
TCGA-B6-A0IQ-01Z-00-DX1.662EA039-825E-41FF-91D6-021EB0E099BD-32-115868x79560-3620x2486.png	2486	351.954	722.937	1885.06	1196.39	1859.78	1170.71	1871.92	1183.04	2.3013	477.472	0.782499	20.0036	0.987373	0.527256	0.484887	30.1224	30.5571	6.37301	2.54434	2.26314	17.5671	16.5463	2.00053	96.9692	0.765293	0.465907	0.0565	0.138218	0.0642556	0.0332298	0.0235281	0.020953	0.0311878	0.0266827	0.0156242	0.0171476	0.0127901	0.0113876	0.0126197	0.014795	0.0151949	0.00946081	0.00984059	0.0101491	0.00831178	0.00763656	0.00847636	0.00863101
TCGA-B6-A0RE-01Z-00-DX1.8933BDB4-EF8D-41FA-9A50-05BB3AB976E5-32-124486x63951-3890x1998.png	1998	321.648	648.404	2141.51	832.638	2115.84	809.585	2128.17	820.601	2.1999	429.574	0.786919	19.1706	0.992233	0.528273	0.500911	28.9434	29.3332	6.17043	2.49363	2.22461	16.5536	15.6798	1.36292	90.5597	0.770605	0.461654	0.0563131	0.137042	0.0641965	0.0329721	0.0230166	0.0220473	0.0314078	0.0271585	0.0155746	0.0168669	0.0129084	0.0117935	0.0127077	0.0148362	0.0154291	0.00932354	0.00996189	0.0100348	0.00834312	0.00771826	0.00864622	0.00858591
TCGA-B6-A0RG-01Z-00-DX1.C83D21A0-EC61-459C-9776-EA3D91469E72-32-147468x93657-4608x2926.png	2926	246.089	532.55	2157.49	1261.08	2134.61	1239.58	2145.54	1249.83	2.56134	348.14	0.801065	16.8382	0.994907	0.494806	0.451381	26.7761	26.8219	5.14473	2.12487	1.87111	14.7204	14.0199	1.71443	85.2664	0.731027	0.428223	0.0551169	0.123734	0.0635413	0.0340788	0.0230174	0.0227655	0.0306963	0.0274697	0.0168856	0.0171544	0.0127441	0.0123277	0.0136329	0.0148382	0.0159611	0.010121	0.0105432	0.0102815	0.00838938	0.00860788	0.00917072	0.00926329
TCGA-B6-A0RH-01Z-00-DX1.33DB5CF9-AC87-435B-A8AF-C4F84BEF15F1-32-119951x92237-3748x2882.png	2882	240.666	526.707	1633.9	1388.19	1610.98	1367.14	1621.94	1377.17	2.61789	346.329	0.79862	16.6103	0.993163	0.485793	0.438945	26.3146	26.3511	5.04168	2.08265	1.82078	14.7976	14.0447	-0.874793	85.1865	0.718146	0.425309	0.0556684	0.122141	0.0631493	0.0346208	0.0234629	0.0227423	0.0305865	0.0274464	0.0168924	0.0174883	0.0129829	0.012334	0.0138809	0.0147837	0.0159994	0.0103066	0.01063	0.0103221	0.00866675	0.00871439	0.00931308	0.00937541
TCGA-B6-A0RI-01Z-00-DX1.E39951A4-AC6A-4B07-851B-F35CB86D79AA-32-150341x83694-4698x2615.png	2615	225.333	505.321	2376.08	1236.53	2353.67	1215.74	2364.37	1225.65	2.54623	320.152	0.815686	16.1298	0.995152	0.484667	0.45251	26.5108	26.38	4.88837	2.04846	1.80062	13.7927	13.1365	-4.75033	81.2964	0.727283	0.412457	0.0537964	0.12004	0.0635417	0.0338164	0.0223899	0.0238098	0.0308821	0.0277481	0.0169745	0.0170657	0.0126018	0.0123734	0.0139156	0.0149218	0.0162294	0.0103012	0.0106658	0.0101784	0.00826085	0.00868584	0.00931435	0.00936446
TCGA-B6-A0RL-01Z-00-DX1.B5B6709B-5F38-4561-A0E7-C78F97B33F22-32-131189x87121-4099x2722.png	2722	319.013	649.246	1861.31	1141.55	1836.01	1118.23	1848.17	1129.39	2.24779	429.063	0.782861	19.1073	0.989171	0.527387	0.496729	28.8096	29.1374	6.1459	2.47987	2.20439	16.6498	15.7803	-2.07241	90.9404	0.766466	0.46633	0.0567823	0.136333	0.0643272	0.0328091	0.0232494	0.0213526	0.0307216	0.0269285	0.0155486	0.0169678	0.013001	0.0116716	0.0127421	0.0145743	0.0155131	0.0094158	0.00986572	0.0101066	0.00836125	0.00796316	0.00854086	0.0086034
TCGA-B6-A0RM-01Z-00-DX1.31DE3E32-7996-4D30-BB5F-72C94409C940-32-154579x71810-4830x2244.png	2244	284.657	591.594	2501.45	1200.25	2477.75	1177.5	2489.11	1188.37	2.23353	383.009	0.802581	18.0246	0.993337	0.520306	0.502516	28.0782	28.2334	5.74049	2.35243	2.09634	15.2592	14.5374	0.862756	85.596	0.770374	0.447069	0.0556101	0.131945	0.0656538	0.0331654	0.0225435	0.0229747	0.0311532	0.0277859	0.0159274	0.01668	0.0124219	0.0121604	0.0131672	0.0148233	0.0157973	0.00957037	0.00999924	0.00982731	0.00804928	0.00814983	0.00877173	0.00872296
TCGA-B6-A0RN-01Z-00-DX1.0D02A3FB-D694-4A5B-80C1-CF1469E29BFD-32-98892x80275-3090x2508.png	2508	264.263	600.077	1667.91	974.977	1645.13	951.079	1656.03	962.539	2.5992	372.777	0.817672	17.3195	0.994549	0.477432	0.44443	28.476	28.5939	5.27917	2.16925	1.90268	14.7308	14.0158	-11.9498	88.1007	0.729296	0.405953	0.053097	0.12165	0.0618497	0.0335522	0.0214591	0.0243047	0.0308317	0.0266485	0.0167946	0.0167039	0.0119441	0.0123835	0.0137151	0.0149092	0.0156017	0.0101056	0.0103307	0.00982145	0.00777307	0.00841448	0.009003	0.00917359
TCGA-B6-A0RO-01Z-00-DX1.3ADBFF05-92CE-41B5-BD49-CB3CE5B74CC9-32-149383x93642-4668x2926.png	2926	240.627	516.312	2414.43	1437.33	2392.57	1415.5	2402.99	1425.93	2.50079	337.797	0.798139	16.657	0.994927	0.496892	0.457983	26.228	26.311	5.14049	2.12531	1.86724	14.5646	13.8914	-2.40381	83.2458	0.733452	0.433588	0.0562824	0.124947	0.0639518	0.0342053	0.0229954	0.0226589	0.0304595	0.0274744	0.016749	0.0171399	0.0129319	0.0123268	0.0135743	0.014741	0.0160804	0.0101272	0.0105317	0.0102617	0.00852523	0.00855964	0.00922002	0.00923548
TCGA-B6-A0RP-01Z-00-DX1.02A55E9D-2AA9-497A-B481-85724EA813AD-32-140765x77884-4398x2433.png	2433	298.566	657.694	2255.37	999.166	2230.45	975.535	2242.41	986.861	2.57887	426.841	0.794617	18.4078	0.99096	0.502328	0.466075	29.2676	29.3075	5.70815	2.31897	2.04877	16.286	15.4233	0.787486	92.9948	0.737446	0.439688	0.0555367	0.127664	0.0632335	0.0327561	0.0229354	0.0217084	0.030386	0.0266053	0.0160235	0.0170616	0.0127196	0.0116567	0.0130509	0.0145478	0.0152495	0.00978636	0.0101703	0.0100939	0.00824989	0.00795429	0.00877305	0.00881747
TCGA-B6-A0RQ-01Z-00-DX1.68B4F49D-9F81-4501-BC66-0349012077C8-32-119000x64607-3718x2018.png	2018	302.964	651.58	1814.56	1076.53	1789.55	1053.04	1801.6	1064.29	2.46916	425.301	0.79453	18.5345	0.989144	0.500573	0.461734	28.9312	29.1931	5.76822	2.33357	2.06245	16.3489	15.3905	-6.0376	92.5196	0.737894	0.439194	0.0556677	0.129589	0.0629229	0.0337923	0.0227089	0.0219726	0.0308292	0.0269065	0.0162906	0.0172615	0.0128008	0.0119826	0.0132671	0.0148025	0.0156369	0.0097693	0.010305	0.0102567	0.00827645	0.00820371	0.00875796	0.00898165
TCGA-B6-A0RS-01Z-00-DX1.F72B766D-FC49-4876-A93D-D88B05702267-32-137297x84231-4290x2632.png	2632	316.286	635.57	1827.88	1389.51	1803.42	1365.92	1815.13	1377.19	2.19199	424.129	0.782048	19.0018	0.992807	0.534529	0.505959	28.5304	28.8076	6.11557	2.47468	2.20586	16.5338	15.6847	0.234759	89.7388	0.772041	0.471233	0.0565111	0.13731	0.0655096	0.0325069	0.0236656	0.0213006	0.0310208	0.0274255	0.0155773	0.0171173	0.0128953	0.0116284	0.0127391	0.0147335	0.0155477	0.00936087	0.00994288	0.0100311	0.00840704	0.00793443	0.00866489	0.00864234
TCGA-B6-A0RT-01Z-00-DX1.6C2BA663-D61B-404B-B62C-B81747B6A3AC-32-98631x84764-3082x2648.png	2648	319.411	637.34	1251.49	1039.23	1226.99	1015.71	1238.74	1026.96	2.20813	429.131	0.778326	19.0804	0.988536	0.537651	0.499896	28.3432	28.6809	6.10887	2.46874	2.20628	16.733	15.8648	0.183764	90.7384	0.771041	0.475134	0.0567462	0.138433	0.0653646	0.0325161	0.0238043	0.0208975	0.031097	0.0272619	0.0152013	0.0173111	0.0134166	0.0116077	0.0125848	0.0148107	0.0155081	0.00939551	0.00997929	0.0102358	0.00858462	0.00777774	0.00870914	0.00859926
TCGA-B6-A0RU-01Z-00-DX1.4977531C-6003-4DA6-9925-30E2DA62C076-32-148426x69929-4638x2185.png	2185	299.31	626.548	2784.66	1101.89	2759.01	1079.73	2771.32	1090.33	2.31492	411.461	0.797497	18.4698	0.99031	0.516282	0.489998	28.7547	28.9796	5.84358	2.37744	2.11434	15.9772	15.113	-1.67823	89.3569	0.756064	0.445618	0.0562892	0.130923	0.0644425	0.0336163	0.0230941	0.0222554	0.0312064	0.0268951	0.0161296	0.0170354	0.0126408	0.0118066	0.0130973	0.0145537	0.0154035	0.00974501	0.0101345	0.00998017	0.00813583	0.00807491	0.00861878	0.0087723
TCGA-B6-A0RV-01Z-00-DX1.C46C2937-868D-47B7-B9B9-E51F5433BE97-32-119698x91781-3740x2868.png	2868	317.283	662.7	1946.71	1372.98	1921.3	1349.27	1933.51	1360.6	2.31192	432.825	0.793327	19.0517	0.988361	0.521575	0.487574	29.5016	29.7436	6.02407	2.43721	2.17222	16.4271	15.5398	6.7727	92.2526	0.763162	0.453338	0.0555137	0.134049	0.0644545	0.0327299	0.0226731	0.0217292	0.0313643	0.0270092	0.0155961	0.0169124	0.0125183	0.0116804	0.0128626	0.0148109	0.015421	0.00948095	0.00997526	0.00994682	0.00819089	0.00786045	0.00864202	0.00867436
TCGA-B6-A0WS-01Z-00-DX1.020ED7BF-9497-4F13-AA07-FE0E839F9A06-32-142799x73449-4462x2295.png	2295	265.677	578.565	2429.74	1290.99	2405.57	1269.23	2417.16	1279.64	2.37489	364.431	0.810132	17.4552	0.994369	0.499257	0.475113	27.7946	27.9778	5.45192	2.24181	1.98602	14.7762	14.0477	-14.6168	85.321	0.751897	0.429006	0.0543831	0.128388	0.0641253	0.033252	0.0220494	0.0238102	0.0315697	0.0272065	0.0160638	0.016637	0.0122644	0.0121515	0.0135565	0.014975	0.0157764	0.00967405	0.010119	0.00985505	0.00796462	0.00833997	0.00886289	0.0091018
TCGA-B6-A0WT-01Z-00-DX1.7ED21DA2-A3D8-4DCA-9742-963879A658D8-32-151298x93635-4728x2926.png	2926	320.814	667.897	2453.85	1663.44	2429.49	1638.5	2441.2	1650.47	2.26591	433.987	0.793357	19.1605	0.990964	0.518209	0.49094	29.3743	29.7622	6.11092	2.46717	2.19504	16.5277	15.6262	1.39057	91.8407	0.763916	0.452249	0.0553503	0.135545	0.0643315	0.0331423	0.0225949	0.0223094	0.031464	0.0269287	0.0158013	0.0167372	0.0124642	0.011602	0.0128655	0.0147525	0.015405	0.00953667	0.0100054	0.00989404	0.00809385	0.00780821	0.00861366	0.00860034
TCGA-B6-A0WV-01Z-00-DX1.A8B9E114-A8CF-4389-B47C-2E1B842F7FF9-32-124486x91239-3890x2851.png	2851	290.857	605.331	2174.27	1222.05	2150.5	1198.9	2161.89	1209.97	2.32248	397.916	0.78967	18.2637	0.993035	0.515987	0.48543	27.8392	28.1334	5.78307	2.35245	2.09278	15.9561	15.1391	-0.752503	88.4792	0.756814	0.454097	0.0572203	0.132974	0.0644557	0.0342623	0.0234055	0.022039	0.0308394	0.0270885	0.0163081	0.0172061	0.0128696	0.011826	0.0128652	0.0146517	0.0156086	0.0096746	0.00999966	0.010175	0.00843283	0.00809551	0.00874501	0.00879293
TCGA-B6-A0WW-01Z-00-DX1.64048633-1D1A-4074-8C50-7641159355DB-32-118740x81330-3710x2541.png	2541	212.586	497.082	1889.68	1178.78	1867.89	1157.57	1878.3	1167.67	2.87156	318.411	0.815806	15.6726	0.996194	0.460096	0.408399	26.3176	26.1619	4.5628	1.91627	1.65618	13.8748	13.2049	-1.35039	83.9418	0.691579	0.392125	0.0533965	0.112471	0.0611906	0.0344223	0.022197	0.0237241	0.0301656	0.0267435	0.0174175	0.0172667	0.0126605	0.0125865	0.0144343	0.014898	0.0159637	0.0106535	0.0110004	0.010327	0.00829256	0.00902457	0.00947737	0.00960793
TCGA-B6-A0WX-01Z-00-DX1.1C4F7BCC-8423-4941-9490-0F35038E1878-32-157044x93602-4907x2925.png	2925	195.834	464.062	2487.86	1501.62	2467.44	1480.49	2477.13	1490.59	2.73573	286.6	0.824703	15.0434	0.997154	0.460561	0.427557	25.8718	25.5409	4.42384	1.89093	1.6327	12.8376	12.2886	5.97035	78.1579	0.703727	0.390528	0.05274	0.110794	0.0617729	0.0337232	0.0216747	0.0240077	0.0298859	0.0276939	0.017326	0.0168031	0.0123041	0.0125874	0.0144144	0.0148905	0.0164254	0.0106005	0.0107828	0.00998266	0.00820551	0.00911472	0.00947673	0.00972472
TCGA-B6-A0WY-01Z-00-DX1.FA103E02-3BDC-47DC-BA6E-59FCC58866D1-32-115868x86447-3620x2701.png	2701	301.386	655.672	1698.95	1300.26	1674.08	1276.5	1686.02	1287.87	2.44336	420.342	0.803434	18.52	0.990883	0.505423	0.469874	29.4258	29.6017	5.74585	2.33212	2.07146	15.9572	15.0645	1.97328	92.1819	0.748972	0.435305	0.0549214	0.129404	0.0639868	0.0335493	0.0223258	0.0225304	0.0313112	0.0269222	0.0161487	0.0168654	0.0124064	0.0118997	0.0131881	0.0149656	0.0155446	0.00977436	0.010202	0.00994092	0.00811602	0.00810192	0.00875149	0.00881755
TCGA-B6-A0WZ-01Z-00-DX1.6CFB236E-36F5-43D6-8DE3-C4ECBD3C14C6-32-112037x75501-3501x2359.png	2359	273.76	578.987	1646.53	1136.08	1622.93	1113.91	1634.22	1124.46	2.22962	371.923	0.797658	17.6968	0.992362	0.521504	0.506024	27.677	27.8338	5.63834	2.31834	2.06902	15.0443	14.3191	1.7208	84.163	0.765829	0.450645	0.0560482	0.131367	0.0649859	0.033055	0.0230996	0.0225355	0.0307718	0.0276653	0.0159945	0.0167802	0.0125485	0.0121016	0.0131306	0.014732	0.0159459	0.00974429	0.010137	0.00994279	0.00814568	0.00814118	0.00889435	0.00894836
TCGA-B6-A0X0-01Z-00-DX1.5D67D9D5-C2F0-40BE-A661-E25B6A6287A2-32-129471x96355-4045x3011.png	3011	340.589	737.742	2443.27	1510.86	2416.95	1485.56	2429.62	1497.66	2.35678	468.113	0.805177	19.6579	0.989008	0.514681	0.487713	31.5775	31.7088	6.20901	2.50451	2.23059	16.6931	15.7964	1.41892	95.7347	0.762844	0.435969	0.054295	0.129944	0.0636009	0.0327439	0.021943	0.0229112	0.0314417	0.0265872	0.0159657	0.0164275	0.0119063	0.0120997	0.0131338	0.0146693	0.0150535	0.00960712	0.00985242	0.00967277	0.00774971	0.0078979	0.00863222	0.00859077
TCGA-B6-A0X1-01Z-00-DX1.2A41630E-A8BF-4966-99F5-D5D8036B1759-32-198220x93358-6194x2917.png	2917	311.748	641.627	3148.57	1567.25	3124.48	1543.13	3136.02	1554.7	2.37553	426.431	0.780457	18.8325	0.992288	0.517695	0.47472	28.3154	28.7348	5.96864	2.40372	2.12967	16.6714	15.7568	0.265143	92.3025	0.753403	0.461395	0.056768	0.135056	0.063648	0.0331094	0.0236821	0.0212085	0.030777	0.0268136	0.0157622	0.0172191	0.0129959	0.0115801	0.0127851	0.014645	0.015345	0.00963692	0.0100291	0.0101935	0.0085327	0.00800532	0.00870888	0.00876963
TCGA-B6-A0X4-01Z-00-DX1.4B7914DE-3436-4D69-9BC6-F6419D3CC518-32-105334x78092-3291x2440.png	2440	303.717	645.639	1524.99	980.928	1501.55	955.99	1512.75	967.948	2.32711	414.28	0.800816	18.6102	0.993442	0.513289	0.48754	29.2066	29.426	5.88415	2.39036	2.12628	15.8643	15.0517	7.79472	90.2459	0.760573	0.44319	0.055243	0.131693	0.0645012	0.0329965	0.022295	0.022884	0.0314191	0.0270068	0.0159899	0.0168074	0.0123345	0.0121989	0.0130964	0.0146678	0.0154964	0.00975605	0.0102025	0.00981556	0.00804843	0.00792476	0.00868043	0.00870113
TCGA-B6-A0X5-01Z-00-DX1.02A9FF1E-EA20-4F2D-A2BB-427A287DE3FD-32-123528x62423-3860x1950.png	1950	327.893	689.279	2216.12	1062.14	2190.19	1038.16	2202.66	1049.67	2.28981	445.911	0.802379	19.2986	0.987807	0.517753	0.488753	30.0792	30.3835	6.08753	2.45789	2.19262	16.5047	15.5698	-1.89802	93.4818	0.765003	0.444127	0.0549529	0.133609	0.0650931	0.0333584	0.0223472	0.0229304	0.0322142	0.0271648	0.0159595	0.0167169	0.0122348	0.011809	0.0132148	0.0150561	0.0155192	0.00956453	0.010008	0.00992908	0.00799098	0.00778735	0.00861918	0.00856091
TCGA-B6-A0X7-01Z-00-DX1.A2AA8FE9-CF43-434A-AE72-7277D124BD0A-32-138850x93708-4339x2928.png	2928	282.045	599.337	2243.13	1230.8	2218.49	1208.52	2230.33	1219.19	2.32122	385.184	0.811577	17.944	0.992105	0.508888	0.485141	28.6767	28.739	5.62286	2.31011	2.05552	15.1208	14.372	5.97948	86.6725	0.756933	0.429999	0.0545047	0.128148	0.064644	0.0334218	0.022045	0.023499	0.0316728	0.0273463	0.0163888	0.0166835	0.0121087	0.0120582	0.0134879	0.0149872	0.0159012	0.00979144	0.0100795	0.00982753	0.00794313	0.00821837	0.00887461	0.00892252
TCGA-B6-A1KC-01Z-00-DX1.4DD3E48B-F434-499F-9FF1-0FFD2883A375-32-117096x77610-3659x2425.png	2425	297.937	620.169	1782.18	1292.38	1758.86	1268.08	1770.02	1279.74	2.28709	404.639	0.80215	18.4356	0.994583	0.519828	0.492769	28.8909	29.0638	5.82494	2.37785	2.12013	15.6874	14.8758	1.86082	88.6664	0.763256	0.444181	0.0553197	0.131473	0.064771	0.0331182	0.0226284	0.0226491	0.0313906	0.0272853	0.0160416	0.0168749	0.012454	0.0120369	0.0132972	0.0148502	0.0156468	0.00967494	0.0100246	0.00989371	0.00814829	0.00797875	0.00868483	0.00872814
TCGA-B6-A1KF-01Z-00-DX1.2E08E830-4216-4CD0-9646-1F489300E11D-32-121856x89104-3808x2784.png	2784	287.65	641.651	2355.06	1480.67	2327.5	1459.26	2340.78	1469.48	2.58616	406.842	0.826021	18.0982	0.993283	0.491952	0.449984	30.7142	30.6095	5.49039	2.25223	1.99658	15.1292	14.2942	1.54783	91.9041	0.735597	0.402614	0.051162	0.122089	0.0622901	0.0321158	0.0209456	0.0233356	0.0315183	0.0267139	0.016031	0.0162136	0.0115612	0.0121876	0.0135474	0.0151033	0.0153283	0.00965869	0.00997246	0.00969254	0.00757527	0.00817551	0.00871465	0.00899364
TCGA-B6-A1KI-01Z-00-DX1.EFAA08A8-02EC-4A9B-AC6B-79BF2DC5A2AA-32-115192x89294-3599x2790.png	2790	292.481	633.687	1983.12	1640.58	1960.65	1614.89	1971.39	1627.22	2.44724	408.476	0.812304	18.1638	0.992691	0.493769	0.462562	29.4141	29.4788	5.5998	2.29365	2.02909	15.5799	14.7245	0.0268693	89.9488	0.736221	0.417403	0.0540993	0.124113	0.0629745	0.0342384	0.0219026	0.0229853	0.0315845	0.0269502	0.0168872	0.0170938	0.0120748	0.0123128	0.013584	0.0148908	0.0155305	0.0099495	0.0103783	0.00988105	0.00789836	0.00817084	0.008785	0.0090029
TCGA-B6-A1KN-01Z-00-DX1.E769FD65-E5CE-4CA4-8BBE-6FC54A2ED870-32-137088x92010-4284x2875.png	2875	250.742	569.334	1889.38	1075.53	1865.1	1054.2	1876.74	1064.34	2.54512	353.133	0.822232	16.9423	0.995342	0.488875	0.457219	28.2999	28.1726	5.1512	2.13957	1.88747	14.1667	13.4805	-4.83449	85.4668	0.737819	0.409154	0.052824	0.120687	0.0636276	0.0328848	0.0215873	0.0239002	0.0312338	0.0273173	0.0165157	0.0165518	0.0118765	0.0124294	0.0138264	0.0149941	0.0158587	0.0100883	0.0101406	0.00978331	0.0077456	0.00857781	0.00899477	0.00917585
TCGA-B6-A2IU-01Z-00-DX1.3C7DF701-4ED9-4989-AA63-A6B7B105F6EE-32-127568x85794-3986x2681.png	2681	312.711	668.194	2152.85	1370.71	2127.66	1346.77	2139.74	1358.25	2.49733	437.332	0.790908	18.8326	0.989959	0.500783	0.454142	29.106	29.4931	5.84881	2.35431	2.07523	16.6679	15.6933	6.22597	94.6312	0.737931	0.440516	0.0551094	0.131205	0.0626146	0.0336292	0.0229429	0.0220667	0.0312337	0.0264444	0.0162658	0.0171909	0.0126712	0.0118678	0.0131691	0.0149562	0.0154099	0.00974924	0.0102641	0.0101787	0.00828961	0.00810302	0.00872396	0.0089083
TCGA-BH-A0AU-01Z-00-DX1.E852F218-B15C-4CF8-8FD0-F284043834C4-32-107533x86826-3360x2713.png	2713	311.654	635.025	1339.14	1382.33	1316.22	1357.3	1327.18	1369.32	2.21801	420.034	0.786639	18.8317	0.991449	0.527143	0.501077	28.519	28.8406	6.03656	2.4468	2.18357	16.3355	15.4914	-4.20133	89.3676	0.766569	0.462675	0.0558517	0.135911	0.064844	0.0328354	0.0233759	0.0218916	0.0313571	0.0272224	0.0156411	0.0169139	0.0130651	0.0118503	0.0129065	0.0149124	0.0156729	0.00941744	0.00998995	0.0100144	0.00836275	0.00814362	0.00859438	0.00869856
TCGA-BH-A0AV-01Z-00-DX1.5A686DA4-A29D-4BA7-9BCA-B707F8755E83-32-117134x88825-3660x2775.png	2775	296.798	634.213	1996.76	1338	1973.03	1313.64	1984.41	1325.27	2.38881	409.003	0.808457	18.3199	0.991988	0.50151	0.473699	29.1989	29.3683	5.75316	2.34209	2.07325	15.6689	14.8255	2.59293	89.5681	0.746461	0.427327	0.0548565	0.127729	0.0634644	0.0333616	0.0220304	0.0230348	0.0312827	0.0268451	0.0162587	0.0168418	0.0120441	0.0121203	0.013345	0.0148611	0.0156101	0.00975951	0.0102147	0.00995722	0.00789603	0.00812831	0.0086975	0.00889658
TCGA-BH-A0AW-01Z-00-DX1.9D50A0D2-B103-411C-831E-8520C3D50173-32-111080x90300-3471x2821.png	2821	317.306	662.554	1442.17	1292.97	1417.03	1269.1	1429.12	1280.56	2.30745	436.207	0.790967	19.0152	0.98835	0.518403	0.485353	29.2813	29.5881	6.01625	2.43054	2.16104	16.5928	15.6545	-2.30173	92.1452	0.75556	0.452446	0.0554496	0.13378	0.0642309	0.0331825	0.023312	0.0218335	0.0314538	0.0267567	0.0159734	0.0170589	0.0127107	0.0117445	0.0129597	0.0147838	0.0154467	0.00954281	0.0100605	0.010059	0.00829047	0.00787919	0.00861703	0.00879881
TCGA-BH-A0AY-01Z-00-DX1.A1153465-D9B3-4D83-BE85-F2524B071EE5-32-123528x67016-3860x2094.png	2094	310.421	641.132	2257	958.18	2231.72	935.144	2243.87	946.169	2.24343	423.435	0.790722	18.864	0.986278	0.524944	0.497068	28.8952	29.1265	6.00542	2.43177	2.16921	16.3756	15.4704	-2.39045	90.2345	0.763177	0.458418	0.0566766	0.13486	0.0650678	0.0334227	0.0231784	0.0212698	0.0313168	0.0270085	0.015864	0.0169809	0.0130428	0.0116029	0.0130298	0.01481	0.0154558	0.00955594	0.00996531	0.0101354	0.00831305	0.0078702	0.00865713	0.0086509
TCGA-BH-A0AZ-01Z-00-DX1.E20051E8-DEEF-48E5-B519-40777DDBC96B-32-85450x72222-2670x2256.png	2256	335.134	675.528	1399.24	1019.53	1373.8	995.377	1386.04	1006.95	2.17059	446.815	0.779657	19.6325	0.986412	0.532684	0.505903	29.1604	29.6603	6.35535	2.55381	2.27627	17.1013	16.1798	-5.26609	92.332	0.774827	0.472849	0.0559214	0.140995	0.0647832	0.0324927	0.0234177	0.0213489	0.0311971	0.0268105	0.0153351	0.017008	0.0128124	0.0115233	0.0126082	0.0148821	0.0152422	0.00927815	0.00983212	0.00999199	0.0082745	0.00770922	0.00847452	0.00858819
TCGA-BH-A0B0-01Z-00-DX1.316D35DB-7F13-4AE5-82A7-5716D2519669-32-92171x83830-2880x2619.png	2619	299.862	646.22	1667.47	1437.48	1643.37	1413.41	1654.94	1424.93	2.32725	413.276	0.800559	18.4829	0.993865	0.511657	0.486781	29.0908	29.2695	5.8499	2.38239	2.12102	15.862	15.069	-1.36233	89.0823	0.756156	0.440844	0.0552607	0.1316	0.0642325	0.0332999	0.0224926	0.0225525	0.0315718	0.0271983	0.0158726	0.0169685	0.0123891	0.0119335	0.0132618	0.0149248	0.0155943	0.00953079	0.0100735	0.00997285	0.00811379	0.00810671	0.00867134	0.00881583
TCGA-BH-A0B1-01Z-00-DX1.CC60D284-04FB-4B73-90AA-FCE9185DADB6-32-123528x93797-3860x2931.png	2931	302.073	634.025	1580.61	1375.09	1557.34	1350.31	1568.45	1362.22	2.26857	413.772	0.795886	18.5702	0.989855	0.513893	0.491161	28.8053	29.017	5.89259	2.39192	2.13097	16.0739	15.1959	2.76923	89.1667	0.758094	0.446997	0.0561708	0.131745	0.0644717	0.0335916	0.0230838	0.0220069	0.0313942	0.02738	0.0161487	0.0171782	0.0126156	0.0119087	0.0131368	0.0148925	0.0156013	0.00963202	0.0101097	0.0100061	0.00814634	0.00803122	0.00877437	0.00872303
TCGA-BH-A0B3-01Z-00-DX1.90CB0ED5-FBB7-4ABF-93A0-DD88D60D3D55-32-105334x93907-3291x2934.png	2934	320.774	658.251	1896.39	1059.02	1871.2	1035.37	1883.29	1046.7	2.23541	433.843	0.787866	19.1518	0.989088	0.527058	0.495951	29.0098	29.4151	6.13296	2.47045	2.20159	16.6245	15.71	1.99888	91.5763	0.766947	0.461231	0.0567637	0.136833	0.0645387	0.0333948	0.0232165	0.0217787	0.0311765	0.027081	0.0158256	0.0170881	0.0126151	0.0116226	0.0127663	0.0148731	0.0155677	0.00950213	0.009997	0.0100262	0.00821936	0.00784852	0.00867328	0.00875359
TCGA-BH-A0B5-01Z-00-DX1.742DB0E8-8EB1-47C8-B698-8E2438FB6299-32-106573x76215-3330x2381.png	2381	319.177	657.903	1789.25	1075.15	1764.82	1050.76	1776.53	1062.45	2.25464	432.351	0.786153	19.0759	0.988501	0.521364	0.4935	28.944	29.333	6.10271	2.46045	2.18656	16.5769	15.6694	-3.54405	91.4085	0.762988	0.459616	0.0562829	0.136163	0.0644343	0.0331583	0.0232822	0.0219782	0.0311979	0.0270249	0.0158808	0.0170954	0.0127254	0.0118724	0.0128127	0.0148572	0.0154623	0.00958393	0.0100618	0.0100679	0.00827085	0.00786233	0.00852503	0.00874063
TCGA-BH-A0B6-01Z-00-DX1.4D982935-F600-4F37-ABB5-13AF74F4FDC4-32-107533x87584-3360x2737.png	2737	329.319	664.727	1508.27	1269.41	1484.01	1244.38	1495.67	1256.37	2.15068	438.14	0.788558	19.4395	0.990922	0.531479	0.511394	29.32	29.744	6.28988	2.53613	2.26436	16.674	15.8091	-0.782718	91.053	0.777163	0.464186	0.056145	0.138952	0.0650539	0.0328037	0.0228617	0.0220723	0.0317706	0.0270638	0.0155687	0.0166713	0.0125926	0.0117136	0.0126956	0.0148302	0.0154478	0.00940238	0.00986851	0.00992415	0.00815653	0.00770662	0.00849106	0.00842836
TCGA-BH-A0B7-01Z-00-DX1.6950CDDF-8A81-4B10-BFFF-BE0E33A2C6CC-32-98892x75980-3090x2374.png	2374	295.234	601.004	1017.2	1295.62	994.385	1271.86	1005.29	1283.24	2.23674	400.139	0.780621	18.352	0.991797	0.528385	0.501543	27.4993	27.7406	5.87246	2.38864	2.13365	16.127	15.3004	-0.159051	87.4148	0.76453	0.471607	0.0574049	0.135036	0.0655728	0.0329206	0.0239274	0.0210745	0.030823	0.0273683	0.0157475	0.0171557	0.0131749	0.011753	0.0128409	0.0146626	0.0157369	0.00950942	0.0101915	0.0102573	0.008579	0.00805391	0.00883541	0.00872711
TCGA-BH-A0B8-01Z-00-DX1.380ABAE9-EA83-4E9B-BFB2-6476A86C1ADD-32-104377x83196-3261x2599.png	2599	305.804	641.863	1504.7	1214.49	1480.8	1189.99	1492.25	1201.7	2.2651	415.175	0.800306	18.6387	0.991013	0.511878	0.495301	29.1809	29.4558	5.93027	2.41427	2.1416	15.9178	15.0471	4.9022	89.0683	0.759808	0.442033	0.0546084	0.131916	0.0639745	0.0328008	0.0220777	0.0229129	0.0316025	0.0270161	0.0161466	0.0165448	0.0122382	0.0120573	0.013053	0.014925	0.0153814	0.00959074	0.010134	0.00987502	0.00799091	0.00811965	0.00861598	0.00874575
TCGA-BH-A0B9-01Z-00-DX1.C23ADB4C-52D4-4DFD-B8E3-156E43F0E645-32-102461x83210-3201x2600.png	2600	321.842	671.249	1626.72	1244.48	1601.08	1220.7	1613.41	1232.09	2.31857	437.5	0.796767	19.1487	0.989149	0.516258	0.482547	29.6565	29.9568	6.06125	2.44559	2.17626	16.4798	15.5693	-3.50221	92.7461	0.75876	0.446622	0.0555761	0.133297	0.0638562	0.0334234	0.02252	0.0224119	0.0314601	0.0268057	0.0159407	0.0167077	0.0126283	0.0118404	0.0131059	0.0149252	0.0154642	0.00960423	0.0100061	0.00993521	0.00803769	0.00787492	0.00857299	0.00866054
TCGA-BH-A0BA-01Z-00-DX1.579E11C9-437C-4D49-8811-DD94D8454712-32-106292x89565-3321x2798.png	2798	334.046	683.068	1786.44	1608.28	1761.11	1583.93	1773.28	1595.61	2.26092	452.434	0.786167	19.4916	0.988992	0.528488	0.490952	29.5629	29.8535	6.19656	2.49486	2.22554	16.9835	16.0229	-3.43665	93.7565	0.765868	0.463111	0.0560337	0.136106	0.064984	0.0330628	0.0235389	0.0218005	0.0316202	0.0269015	0.0155907	0.0171203	0.0129208	0.0117046	0.0128298	0.0148451	0.0153611	0.00941057	0.00997631	0.0100924	0.00836001	0.00795234	0.00854869	0.00863837
TCGA-BH-A0BC-01Z-00-DX1.7A91831D-9625-49FC-B783-C633F80F898C-32-103419x87795-3231x2743.png	2743	331.027	706.108	2018.21	1484.37	1993.53	1458.58	2005.42	1471	2.30961	453.425	0.803959	19.4234	0.990707	0.515267	0.484368	30.4766	30.7727	6.11769	2.46553	2.19589	16.6057	15.637	0.81482	94.5316	0.76087	0.442029	0.0547179	0.133585	0.0649795	0.0331852	0.0220688	0.0228403	0.0318889	0.026808	0.0159822	0.0169248	0.0122214	0.0119134	0.0129452	0.0148337	0.0152432	0.00948037	0.0100435	0.00983301	0.00800336	0.00783656	0.00856896	0.00872291
TCGA-BH-A0BD-01Z-00-DX1.CD4A6FC2-BA8C-4E30-972A-E6CD1BEAD8AD-32-107249x93893-3351x2934.png	2934	296.951	635.819	1934.66	1524.17	1911.34	1499.28	1922.48	1511.21	2.32926	411.304	0.804892	18.4099	0.99336	0.51038	0.486837	29.3349	29.4944	5.78789	2.35794	2.10406	15.785	14.8989	-0.348522	89.4303	0.752448	0.435757	0.0552729	0.128878	0.0639782	0.0332684	0.0222161	0.0227786	0.0314473	0.0270993	0.0159084	0.0167077	0.0121997	0.0119411	0.0132679	0.0150337	0.0156443	0.00956123	0.0102332	0.00979372	0.00803472	0.00823649	0.00873985	0.00888816
TCGA-BH-A0BF-01Z-00-DX1.934DF984-9054-4B20-B85B-9CF94B8DC3D4-32-121935x88814-3810x2775.png	2775	303.699	613.41	2080.97	1113.26	2057.65	1089.32	2068.82	1100.77	2.1726	407.71	0.784672	18.6838	0.990214	0.532055	0.508509	28.0166	28.3109	6.01907	2.44377	2.18193	16.2524	15.419	1.65124	87.8162	0.770818	0.468663	0.0570575	0.136956	0.0658528	0.0331296	0.0235845	0.0216887	0.0313173	0.0273928	0.0156997	0.0170201	0.0130474	0.011879	0.012761	0.0148286	0.0156021	0.00945819	0.0100434	0.0101477	0.00849872	0.00798845	0.0086526	0.00866394
TCGA-BH-A0BG-01Z-00-DX1.0838FB7F-8C85-4687-9F70-D136A1063383-32-89291x72971-2790x2280.png	2280	275.106	540.826	1444.54	1089.86	1422.37	1067.57	1432.94	1078.23	2.02779	362.77	0.773723	17.8323	0.9935	0.545963	0.543057	26.1572	26.431	5.89649	2.41989	2.16453	15.4579	14.7641	-0.595407	80.875	0.784629	0.489353	0.0592093	0.139248	0.0666866	0.0324931	0.0242563	0.0209751	0.0302491	0.0273436	0.0154619	0.0169419	0.0132627	0.0117962	0.012498	0.0142824	0.0157336	0.00960392	0.00994103	0.00985289	0.00865467	0.00812666	0.00876855	0.00860208
TCGA-BH-A0BJ-01Z-00-DX1.77BE9A20-3D23-4650-843A-0483BF9DD07B-32-135977x87349-4249x2729.png	2729	301.287	658.163	2167.73	1531.67	2143.71	1506.69	2155.24	1518.71	2.31515	413.832	0.813283	18.586	0.989511	0.50523	0.485713	29.9883	30.1361	5.82755	2.37688	2.12304	15.643	14.7764	-1.65936	89.9076	0.756765	0.427957	0.0540606	0.12946	0.0638332	0.0334772	0.0218646	0.0229846	0.0317887	0.0270094	0.0161957	0.0166639	0.0120012	0.0119393	0.0131923	0.0150003	0.0155322	0.00957551	0.0100741	0.00970379	0.00782173	0.00791115	0.00867676	0.00871601
TCGA-BH-A0BL-01Z-00-DX1.D5A413B0-2141-4A6F-A671-6C5EA8641D25-32-85450x81571-2670x2549.png	2549	302.509	680.656	1142.51	1361.25	1119.58	1334.29	1130.56	1347.29	2.79261	442.529	0.805155	18.4567	0.986773	0.476623	0.42944	30.3039	30.3978	5.58402	2.26068	1.98071	16.4641	15.5363	0.462863	96.415	0.704874	0.407723	0.0531412	0.120133	0.0606817	0.033348	0.0219758	0.0227907	0.0303646	0.0259302	0.016699	0.0169722	0.0122512	0.0124702	0.0134491	0.014728	0.0151336	0.0101022	0.0104398	0.0100998	0.00800079	0.00836123	0.00899483	0.00902662
TCGA-BH-A0BM-01Z-00-DX1.8BD324F2-60F5-4F59-AF2D-533A5FB230BF-32-89055x75378-2782x2355.png	2355	327.211	705.537	1799.57	836.668	1773.07	812.431	1785.84	824.046	2.43395	457.719	0.806292	19.3134	0.986717	0.502491	0.465221	30.6707	30.8086	5.98021	2.41305	2.14394	16.7527	15.7116	3.93856	95.9735	0.743361	0.432704	0.0539598	0.129907	0.0644635	0.0335165	0.0223457	0.0224447	0.0321071	0.0264065	0.0162064	0.0174577	0.0123722	0.0120813	0.0133837	0.0149606	0.0153471	0.00971702	0.010118	0.00997267	0.00796997	0.00789187	0.00849645	0.00876262
TCGA-BH-A0BO-01Z-00-DX1.1A704471-FEB3-40F9-9838-3E347A18285F-32-109453x72418-3420x2263.png	2263	276.509	592.327	1784.52	1022.51	1761.43	999.171	1772.46	1010.26	2.32915	377.045	0.821497	17.6492	0.993635	0.501246	0.479382	28.5594	28.5871	5.49962	2.27136	2.01205	14.7728	13.9878	0.61807	85.2667	0.750374	0.419306	0.0540657	0.125231	0.065318	0.0335361	0.0216493	0.0236772	0.0319714	0.0275569	0.0168044	0.016457	0.0119872	0.0124118	0.0137065	0.015076	0.0159217	0.00999978	0.0104849	0.00966447	0.00795672	0.00842112	0.00879753	0.00895124
TCGA-BH-A0BP-01Z-00-DX1.63A87C1D-87FA-494D-9836-74290B5DC30D-32-80650x74506-2520x2328.png	2328	291.263	621.692	1654.2	1173.05	1630.93	1148.62	1642.08	1160.31	2.32374	402.81	0.796849	18.2261	0.99291	0.502314	0.483369	28.6348	28.8187	5.75806	2.34884	2.08185	15.855	14.9649	0.616354	87.9346	0.745512	0.436912	0.0551142	0.129291	0.0627635	0.0331859	0.0227209	0.0226493	0.0309722	0.0265999	0.0159466	0.016867	0.0126362	0.0123433	0.0132932	0.0148828	0.0156256	0.00970656	0.0101302	0.0100054	0.00832346	0.00806582	0.00889905	0.00893977
TCGA-BH-A0BQ-01Z-00-DX1.F5C6386B-BB2C-49DF-B3B8-6C4B80D060D4-32-105613x88852-3300x2776.png	2776	311.88	637.891	1422.91	1482.33	1399.12	1457.9	1410.51	1469.61	2.24054	420.63	0.790949	18.8878	0.989774	0.526436	0.49827	28.7641	29.1396	6.05311	2.44905	2.17924	16.2996	15.4481	3.8212	90.064	0.767427	0.457598	0.0562938	0.135235	0.0647916	0.033325	0.0227137	0.022389	0.0311952	0.0269858	0.0159096	0.0169291	0.0125146	0.0120157	0.0130742	0.0147031	0.015462	0.00953557	0.00993469	0.010009	0.00815784	0.00797175	0.00868419	0.00860616
TCGA-BH-A0BR-01Z-00-DX1.F7912887-8AE9-4391-9B83-9AC7B4FF38EF-32-107533x76466-3360x2389.png	2389	314.341	658.966	1969.22	1229.03	1945.1	1204.17	1956.66	1216.09	2.27786	423.996	0.806208	18.8673	0.993422	0.514907	0.49268	29.6914	29.9582	5.99916	2.43758	2.17086	15.9798	15.1574	-5.38018	90.2443	0.763507	0.438704	0.0553944	0.131139	0.0639727	0.0332506	0.0218244	0.0230693	0.0314159	0.0270356	0.0159454	0.016698	0.0120172	0.0120184	0.0132324	0.0147023	0.0155161	0.00968161	0.00998552	0.00976567	0.00772997	0.00807739	0.00864516	0.008618
TCGA-BH-A0BS-01Z-00-DX1.FEE32127-4D0B-4560-A39C-4EAA5B189B70-32-108493x88844-3390x2776.png	2776	330.107	690.018	2299.39	1428.17	2275	1402.41	2286.72	1414.75	2.28697	446.796	0.804202	19.3553	0.991508	0.520489	0.491759	30.4676	30.8396	6.17322	2.48862	2.21507	16.3643	15.5241	4.61725	93.1085	0.764758	0.43867	0.0542586	0.133102	0.0636698	0.0329404	0.0216568	0.0233287	0.031424	0.0267709	0.0158941	0.0164127	0.011999	0.0120624	0.0131477	0.0148635	0.0155196	0.00961498	0.00991889	0.00972638	0.00775181	0.00800569	0.00851164	0.00865758
TCGA-BH-A0BT-01Z-00-DX1.9087B9E7-C0CD-4179-AF57-AD9255785169-32-84490x77278-2640x2414.png	2414	323.346	647.753	1299.57	1321.45	1273.44	1298.86	1286.03	1309.63	2.14126	429.94	0.788306	19.299	0.989667	0.536836	0.511656	28.9668	29.4012	6.24049	2.51935	2.25125	16.5893	15.729	-5.24328	90.3529	0.779271	0.466497	0.0564363	0.139689	0.0657178	0.0329257	0.0230591	0.0220197	0.0318345	0.0272991	0.0154822	0.0168731	0.0126271	0.01164	0.012595	0.0148831	0.015596	0.00937028	0.00984603	0.00993531	0.00814281	0.00762929	0.00855569	0.00859256
TCGA-BH-A0BV-01Z-00-DX1.3C9CD4F7-A001-430D-AA8D-80CAD61C344E-32-91928x93215-2872x2912.png	2912	311.906	619.397	1501.79	1365.06	1478.3	1341.25	1489.53	1352.68	2.09542	416.513	0.769158	18.9345	0.989725	0.545714	0.527482	27.6248	28.0641	6.22255	2.50964	2.24311	16.6497	15.8168	-0.814836	87.8941	0.78066	0.490095	0.0588685	0.140862	0.0658615	0.0327404	0.0240402	0.0210122	0.0303927	0.0272588	0.0155366	0.0169102	0.0131672	0.0116863	0.0125081	0.0144512	0.0154508	0.00944572	0.0099131	0.00999006	0.00860994	0.00795743	0.00868586	0.00846867
TCGA-BH-A0BW-01Z-00-DX1.39B0C363-46A2-4FFB-B1C5-C054A86F4A25-32-124815x87797-3900x2743.png	2743	287.667	609.311	2106.99	1330.76	2083.22	1307.47	2094.63	1318.65	2.37607	396.987	0.798012	18.1058	0.993772	0.511678	0.480845	28.3779	28.5462	5.71707	2.33368	2.07513	15.6395	14.8605	-2.8685	88.0965	0.751293	0.442173	0.0551443	0.129963	0.0636929	0.0334576	0.0227919	0.02247	0.0308311	0.0269197	0.0161156	0.0169088	0.0125954	0.0120814	0.0131685	0.0147682	0.0154888	0.00971728	0.010151	0.0100376	0.00817068	0.00824585	0.00869361	0.00881199
TCGA-BH-A0BZ-01Z-00-DX1.45EB3E93-A871-49C6-9EAE-90D98AE01913-32-112334x85047-3510x2657.png	2657	319.357	631.633	2099.11	1187.15	2075.05	1163.55	2086.59	1174.84	2.15278	427.221	0.776535	19.0485	0.99132	0.542526	0.51255	28.0415	28.431	6.15979	2.4888	2.23082	16.7289	15.8838	-0.609703	89.5672	0.774804	0.480285	0.0573587	0.139408	0.0660689	0.0329339	0.0239519	0.0210226	0.0309033	0.027556	0.0154419	0.0171406	0.0132151	0.0117503	0.0126945	0.0148228	0.0156892	0.0094034	0.0100014	0.0101948	0.00856595	0.00790966	0.00864993	0.00864002
TCGA-BH-A0C0-01Z-00-DX1.2D32D35A-EB7E-4D0E-BE5F-E56F7B930463-32-105334x80638-3291x2519.png	2519	332.096	669.616	1724.84	1237.34	1697.98	1214.59	1710.9	1225.46	2.24944	446.992	0.790117	19.5002	0.988335	0.530355	0.491882	29.6885	30.0668	6.2225	2.50423	2.23095	16.8086	15.8919	-2.16703	93.3767	0.767558	0.458392	0.0559607	0.136886	0.0646678	0.0331267	0.022761	0.0220508	0.0316273	0.0270161	0.0157597	0.0168468	0.0126399	0.0117108	0.0128143	0.0149054	0.0153345	0.00943106	0.00988358	0.010056	0.00815493	0.00770449	0.00856461	0.00860397
TCGA-BH-A0C1-01Z-00-DX1.21FE357E-B182-4397-BFEF-7E96E994236A-32-109453x85052-3420x2657.png	2657	318.734	645.866	1869.2	1269.61	1845.6	1244.77	1856.89	1256.69	2.25624	431.167	0.780978	19.0439	0.990459	0.526452	0.493352	28.6836	29.0795	6.10812	2.46201	2.19198	16.6972	15.8108	-0.0289825	91.0429	0.762095	0.462228	0.05627	0.136055	0.0638205	0.0331407	0.0235756	0.0218913	0.0307384	0.0271595	0.0158397	0.017095	0.0129003	0.0118206	0.0128921	0.014966	0.0155586	0.00955167	0.00998669	0.0101469	0.0083813	0.0079702	0.00867976	0.00876331
TCGA-BH-A0C3-01Z-00-DX1.14D3210D-0CBE-4DCA-A986-A26AE5382502-32-109453x88844-3420x2776.png	2776	326.691	667.119	1755.08	1768.77	1731.88	1742.66	1743.03	1755.22	2.3102	439.001	0.794069	19.2183	0.989996	0.523418	0.490366	29.7411	30.0158	6.13009	2.47523	2.20134	16.4743	15.6657	1.7615	92.2602	0.763449	0.44979	0.0549437	0.132848	0.0641241	0.0323751	0.0225406	0.0224475	0.030926	0.027041	0.0159591	0.0166702	0.0124346	0.0118367	0.0131491	0.0147593	0.0156402	0.00968238	0.00999643	0.00981621	0.0080713	0.00785767	0.00858469	0.00871371
TCGA-BH-A0C7-01Z-00-DX1.C70D358E-C48F-4F69-86CE-3218E9C95837-32-122895x88812-3840x2775.png	2775	323.736	648.695	2090.84	1552.79	2066.83	1528.24	2078.33	1540.01	2.19526	433.371	0.781037	19.2408	0.990515	0.536025	0.506418	28.729	29.1079	6.21187	2.50726	2.23702	16.7717	15.9045	-1.44141	90.9277	0.773326	0.472416	0.0573002	0.138529	0.0651228	0.0329908	0.0237112	0.021278	0.0308649	0.0268132	0.0154498	0.0171119	0.0128352	0.0116891	0.0127164	0.014531	0.0154209	0.00942146	0.00992896	0.0100143	0.00838472	0.00786225	0.0086165	0.00856166
TCGA-BH-A0DE-01Z-00-DX1.64A0340A-8146-48E8-AAF7-4035988B9152-32-101772x74206-3180x2318.png	2318	330.875	690.729	1651.16	1141.42	1625.08	1117.35	1637.63	1128.88	2.28435	450.927	0.794978	19.4234	0.989265	0.517251	0.486882	30.0399	30.4295	6.16907	2.48452	2.21292	16.7721	15.8111	2.07494	93.596	0.758852	0.447855	0.0554917	0.134501	0.0637401	0.0331397	0.0228022	0.0224666	0.0316043	0.0264547	0.0159327	0.0169418	0.0125558	0.0116735	0.0129507	0.014857	0.0153242	0.00959598	0.00997043	0.0100711	0.00810265	0.0077963	0.00861666	0.00865749
TCGA-BH-A0DG-01Z-00-DX1.D3C4F57F-608F-46AA-A978-B558117C9DFB-32-114254x88832-3570x2776.png	2776	306.743	620.731	1778.15	1320.66	1754.55	1296.78	1765.83	1308.23	2.17901	409.766	0.786743	18.7255	0.992456	0.531883	0.510706	28.2475	28.5875	6.05238	2.4563	2.19446	16.1468	15.3536	0.0368407	88.0139	0.774	0.465873	0.0570157	0.136704	0.0653135	0.033042	0.0234237	0.021708	0.031109	0.0272112	0.0157574	0.0168925	0.0127497	0.0118221	0.0127512	0.0146491	0.0155744	0.00955626	0.00993995	0.00999293	0.00823129	0.00790176	0.00868156	0.0085428
TCGA-BH-A0DH-01Z-00-DX1.968AA1FD-068C-4B90-8C95-85BF2EFC3E3F-32-122571x93801-3830x2931.png	2931	295.374	605.854	1774.54	1130.05	1750.88	1106.79	1762.21	1117.93	2.16082	396.935	0.789208	18.3963	0.992128	0.526062	0.513667	27.9991	28.1377	5.89821	2.41114	2.15752	15.8627	15.0671	-1.28458	86.1862	0.770789	0.464559	0.0571285	0.134206	0.0661564	0.0334747	0.0238326	0.0217246	0.0312644	0.0274967	0.0159465	0.0171348	0.0129701	0.0118422	0.0129735	0.0146907	0.0156566	0.00953778	0.0100772	0.0100047	0.00841225	0.00804406	0.00874797	0.00868007
TCGA-BH-A0DI-01Z-00-DX1.6A42D535-8842-4C36-8299-A40E9E56759D-32-114240x84247-3570x2632.png	2632	267.627	576.57	1999.28	1068.42	1976.78	1045.2	1987.55	1056.29	2.48003	377.364	0.793027	17.4522	0.992817	0.498306	0.460509	27.254	27.4383	5.41085	2.21754	1.95462	15.407	14.603	1.06877	87.0849	0.733353	0.437719	0.0550716	0.127417	0.0634391	0.0336995	0.0233689	0.0223582	0.0307794	0.0271254	0.0164201	0.0172763	0.0130703	0.0120309	0.0134893	0.0149076	0.0156775	0.00999209	0.0104599	0.0102302	0.0085329	0.00836394	0.00903439	0.00909153
TCGA-BH-A0DK-01Z-00-DX1.0CFED53C-BAD9-4E35-B12F-57E64F3FEF1C-32-120656x77492-3770x2421.png	2421	302.724	643.074	1942.74	1356.25	1918.73	1332.12	1930.23	1343.7	2.4113	419.804	0.793438	18.5496	0.990258	0.509484	0.470298	28.7035	28.9605	5.80262	2.35026	2.08472	16.2716	15.3722	-0.377647	91.5796	0.747285	0.446428	0.055953	0.131189	0.0641687	0.0336887	0.023172	0.0217221	0.0311908	0.0271007	0.0161637	0.0171758	0.0129507	0.0116655	0.0131091	0.0147767	0.0154414	0.00974445	0.0101765	0.010347	0.00839486	0.00810666	0.00888944	0.00889401
TCGA-BH-A0DL-01Z-00-DX1.553F0021-1FC2-4675-810D-BBD9785D065E-32-109453x72670-3420x2270.png	2270	343.444	710.402	1854.04	1323.23	1827.99	1298.7	1840.52	1310.46	2.29735	467.943	0.782946	19.7634	0.98869	0.527504	0.492376	30.0959	30.4831	6.3287	2.53698	2.25543	17.2938	16.3408	-2.69809	95.2401	0.763253	0.463019	0.0560268	0.136652	0.0635879	0.0327093	0.0231248	0.0212535	0.0308319	0.0264966	0.015651	0.0168386	0.012696	0.011613	0.0127628	0.0146315	0.015183	0.009442	0.00990327	0.00996379	0.0082294	0.00778805	0.00850485	0.00854091
TCGA-BH-A0DO-01Z-00-DX1.1684557E-A5D4-4828-B2D5-FA899993A019-32-93131x81807-2910x2556.png	2556	285.891	591.673	1528.21	1190.25	1504.66	1167.39	1515.93	1178.3	2.21476	388.899	0.788561	18.1044	0.990653	0.515614	0.501698	27.4496	27.6745	5.81287	2.37507	2.11101	15.8515	15.0027	7.9421	85.5286	0.757807	0.459161	0.057314	0.133571	0.0654174	0.0334926	0.0236061	0.0216257	0.0311416	0.0270467	0.0162211	0.0171118	0.0130887	0.0118295	0.0129653	0.0146217	0.0156005	0.00970135	0.0101218	0.0102106	0.0084766	0.00790898	0.00868241	0.00872618
TCGA-BH-A0DP-01Z-00-DX1.5550557D-4E5B-4B57-8C1E-9290A7AA32A9-32-121613x85645-3800x2676.png	2676	317.248	653.826	2381.62	1466.19	2357.93	1441.14	2369.3	1453.19	2.2297	430.542	0.789021	19.02	0.989806	0.521036	0.499067	29.0528	29.3231	6.09782	2.46664	2.19455	16.5582	15.6547	1.42211	90.3076	0.761625	0.457085	0.056703	0.133954	0.0644823	0.0330811	0.0232103	0.0217747	0.0312564	0.027061	0.0159613	0.0169937	0.0128948	0.012063	0.012936	0.0147008	0.0152799	0.00946947	0.0100169	0.010009	0.00828242	0.00796479	0.0086182	0.00865697
TCGA-BH-A0DQ-01Z-00-DX1.5A98747C-52D9-45AD-BC84-934A96F069EB-32-136935x89640-4279x2801.png	2801	322.544	681.75	2351.09	1480.46	2328.3	1453.28	2339.19	1466.38	2.26726	436.686	0.807547	19.2123	0.990307	0.518423	0.49324	30.4399	30.7327	6.08739	2.46213	2.19796	16.1207	15.2544	6.52883	92.3262	0.767167	0.438134	0.0539654	0.133125	0.0644089	0.0326383	0.0217034	0.0232889	0.0321996	0.027014	0.0158114	0.016392	0.0120863	0.012029	0.0132128	0.0150736	0.015439	0.00951109	0.00987068	0.00979214	0.00781859	0.00791696	0.00863253	0.00868157
TCGA-BH-A0DS-01Z-00-DX1.38E82A1F-21B9-4B97-A304-15B886EA68A0-32-130231x87124-4069x2722.png	2722	289.908	615.468	2236.82	1619.82	2213.7	1595.53	2224.77	1607.19	2.22003	391.694	0.804956	18.2282	0.992371	0.512789	0.502633	28.716	28.8607	5.8034	2.37608	2.11711	15.4067	14.6194	5.16038	86.2089	0.764272	0.44306	0.0552208	0.131604	0.0649969	0.0332649	0.0224771	0.0229324	0.0314175	0.0274798	0.0159757	0.0167283	0.0124499	0.0118672	0.01322	0.0148713	0.0157997	0.00970743	0.0100151	0.00973037	0.00817339	0.00817436	0.00863969	0.00880468
TCGA-BH-A0DT-01Z-00-DX1.73AFCEBB-06B1-4870-ADA2-881511B1BE2D-32-100812x69911-3150x2184.png	2184	321.194	658.068	1650.15	1187.22	1626.21	1162.4	1637.71	1174.28	2.20923	431.866	0.788062	19.1014	0.992516	0.524853	0.502856	29.0364	29.362	6.15144	2.4842	2.20992	16.4919	15.6233	-1.25673	90.4971	0.768213	0.45894	0.0568761	0.136219	0.0644068	0.0330698	0.0238739	0.0219233	0.0311345	0.0270848	0.0159214	0.0168159	0.0128322	0.01183	0.0126175	0.0146721	0.0152543	0.0096016	0.00983663	0.0101276	0.00834321	0.00768172	0.00856172	0.00864223
TCGA-BH-A0DV-01Z-00-DX1.2F0B5FB3-40F0-4D27-BFAC-390FB9A42B39-32-133456x88787-4170x2774.png	2774	299.169	629.852	2200.88	1126.23	2178.28	1100.84	2189.08	1113.03	2.36737	412.289	0.798534	18.4927	0.992526	0.515754	0.484484	29.0083	29.1852	5.84864	2.37795	2.116	15.9602	15.1557	1.50015	89.7247	0.754093	0.442301	0.0556465	0.130934	0.0639524	0.0331589	0.0224507	0.0223735	0.0312482	0.0270507	0.0159313	0.0168332	0.0124207	0.0118222	0.0131236	0.0147725	0.0154591	0.00960575	0.010007	0.0099395	0.0081204	0.00805436	0.00867067	0.00872229
TCGA-BH-A0DX-01Z-00-DX1.45C27E71-9A0A-400E-93A9-5CE7780F3C5E-32-142098x85231-4440x2663.png	2663	302.518	648.534	2183.84	1203.39	2159.67	1179.1	2171.27	1190.65	2.32841	415.872	0.810203	18.4051	0.992874	0.497644	0.483794	29.486	29.6452	5.82775	2.37855	2.10318	15.7329	14.8825	1.24743	88.54	0.744087	0.423762	0.0541974	0.126759	0.0630148	0.0333747	0.0214464	0.0233271	0.0313668	0.0269784	0.0167752	0.0166405	0.0118322	0.0123479	0.013616	0.0148599	0.0156038	0.00995991	0.0101149	0.00982225	0.00789279	0.00826623	0.00892743	0.00893049
TCGA-BH-A0DZ-01Z-00-DX1.138BAEC2-589E-4960-B94E-DF48DDAA5490-32-115868x91802-3620x2868.png	2868	321.663	672.133	2048.24	1450.26	2023.7	1425.7	2035.47	1437.49	2.3248	442.145	0.786599	19.1354	0.990605	0.523035	0.488482	29.1933	29.4745	6.08492	2.45028	2.17771	16.7667	15.8531	7.0414	92.8317	0.761064	0.461097	0.0562528	0.135684	0.0646724	0.0328308	0.0230933	0.0215998	0.0311819	0.0269604	0.01568	0.0169716	0.0129043	0.0118162	0.0126954	0.0148115	0.0154694	0.00948301	0.0100274	0.0100643	0.00841435	0.00784419	0.00860882	0.00861921
TCGA-BH-A0E0-01Z-00-DX1.01E88024-83DF-4282-ABAF-F4E35807DA06-32-102461x84228-3201x2632.png	2632	276.134	581.713	1563.7	1345.62	1539.22	1323.83	1550.95	1334.22	2.51595	386.259	0.796425	17.7914	0.993349	0.508575	0.456163	27.7626	27.9722	5.48653	2.23836	1.98172	15.5942	14.775	-1.91989	89.5379	0.739362	0.439033	0.0555189	0.128674	0.0638914	0.0338677	0.0230151	0.0223342	0.0309323	0.0269694	0.0162684	0.0170769	0.0128584	0.0119421	0.013308	0.0148568	0.0157532	0.00975458	0.0102583	0.0101715	0.00841782	0.00830601	0.00891747	0.00906133
TCGA-BH-A0E1-01Z-00-DX1.257EB36A-1008-4890-927B-204EF05DBE90-32-102461x82446-3201x2576.png	2576	344.382	713.409	1541.99	1100.73	1516.54	1075.48	1528.78	1087.57	2.32869	470.267	0.789326	19.8086	0.988374	0.522365	0.481777	30.1377	30.4863	6.25582	2.5052	2.23123	17.3601	16.3634	-1.60607	96.7112	0.761431	0.457729	0.0563932	0.134648	0.0650461	0.0335003	0.0231779	0.0220439	0.0317967	0.0269091	0.015899	0.0172331	0.0127031	0.0117857	0.0129852	0.0149574	0.0152255	0.00955689	0.0100109	0.0100801	0.00813131	0.00776631	0.00860088	0.00860716
TCGA-BH-A0E2-01Z-00-DX1.5F6FA19C-D59F-45BE-80CE-F738CAB1EF0B-32-133104x77417-4159x2419.png	2419	313.197	665.251	1983.18	1089.3	1958.21	1065.24	1970.22	1076.78	2.31166	430.429	0.796952	18.9018	0.991916	0.514547	0.488581	29.4472	29.6868	5.96137	2.4154	2.15246	16.3356	15.4151	1.39258	91.6964	0.758038	0.447425	0.0553516	0.132483	0.0646776	0.0333259	0.0225419	0.0222101	0.0316824	0.027288	0.0160725	0.0168802	0.0124368	0.0117695	0.0129378	0.0148591	0.0155545	0.00970507	0.0101437	0.010015	0.00819998	0.00802954	0.00868299	0.008678
TCGA-BH-A0E6-01Z-00-DX1.44DFEFB4-FA05-4246-8D6B-55BA8C3275DB-32-98631x89863-3082x2808.png	2808	295.006	619.104	1509.57	1287.79	1486.79	1263.26	1497.71	1275.01	2.27257	406.228	0.792892	18.364	0.989449	0.519201	0.496185	28.3752	28.4668	5.81363	2.36876	2.11496	15.9933	15.1075	-2.82573	88.2542	0.756562	0.457289	0.0564287	0.131099	0.0658135	0.033468	0.0233909	0.0216831	0.0311494	0.0271858	0.0161047	0.0171506	0.0130919	0.0119004	0.0129965	0.0147277	0.0157557	0.00973349	0.0100939	0.0101347	0.00849806	0.00807565	0.00879478	0.00885725
TCGA-BH-A0E7-01Z-00-DX1.7FEE54C4-3795-403C-85B9-FF932BE56788-32-103419x93913-3231x2934.png	2934	267.47	555.025	2043.95	1437.63	2021.85	1414.78	2032.35	1425.72	2.2225	363.921	0.796936	17.4896	0.993951	0.52306	0.509212	27.1196	27.1835	5.55283	2.29325	2.04962	14.9875	14.2683	-2.327	82.9828	0.763769	0.455905	0.0554656	0.130425	0.0664592	0.0331453	0.0231466	0.0223572	0.0310809	0.0277077	0.0160028	0.0170005	0.0126617	0.0121459	0.013247	0.0147624	0.0160212	0.00970498	0.0101048	0.0099983	0.00822194	0.00845461	0.00907298	0.00911792
TCGA-BH-A0E9-01Z-00-DX1.5FC4A5E1-3984-4869-9FFB-C0C7F9EAF5FE-32-97932x83815-3060x2619.png	2619	338.326	669.868	1542.8	1388.57	1518.82	1363.18	1530.32	1375.39	2.14689	450.045	0.777902	19.686	0.988328	0.540715	0.509853	29.0595	29.5198	6.36928	2.5595	2.28712	17.1454	16.2414	2.77974	92.4719	0.778577	0.478896	0.0571348	0.141219	0.0655827	0.0326012	0.0233909	0.0210778	0.0313391	0.0271582	0.0153691	0.0170209	0.0130977	0.0113661	0.0124166	0.0147426	0.0155206	0.00933902	0.0099396	0.0101287	0.00851473	0.0076277	0.00857533	0.00858087
TCGA-BH-A0EA-01Z-00-DX1.85FF2B48-2AF7-4C15-A7E6-FCA68CAB76C7-32-85450x65146-2670x2035.png	2035	336.052	745.873	1206.56	863.654	1181.51	837.851	1193.53	850.236	2.33486	473.708	0.777801	19.57	0.987684	0.525629	0.50249	30.3754	30.5653	6.26807	2.52138	2.24588	17.2503	16.3574	-5.96623	94.5034	0.765782	0.470227	0.0567366	0.137046	0.0635347	0.0324489	0.0237793	0.0204852	0.0303171	0.0266519	0.0152377	0.0170152	0.0128247	0.0115768	0.0123319	0.0146437	0.0151786	0.00930839	0.00982346	0.00992231	0.00843156	0.00772693	0.00849215	0.00844535
TCGA-BH-A0EB-01Z-00-DX1.70D7BBA0-214D-4D1A-933C-7CFCDA5416A3-32-136935x85556-4279x2673.png	2673	315.636	659.249	2557	1311.76	2532.72	1287.22	2544.37	1298.98	2.27607	432.383	0.795	18.974	0.989328	0.521467	0.490514	29.2928	29.5377	5.99382	2.42705	2.17025	16.431	15.5087	1.12042	91.6057	0.761476	0.451607	0.0560077	0.133782	0.0648469	0.0336794	0.0229944	0.0219379	0.031622	0.0271109	0.0162	0.0170979	0.0125844	0.0116879	0.0130405	0.0149356	0.0155687	0.00959694	0.0100175	0.0100192	0.00813511	0.00790787	0.00862989	0.00874171
TCGA-BH-A0EE-01Z-00-DX1.872EA586-25C8-4835-A138-152DFA1EBF30-32-125444x93788-3920x2930.png	2930	335.885	683.238	2349.12	1539.37	2324.3	1514.31	2336.23	1526.32	2.21673	451.087	0.791564	19.5882	0.989751	0.528904	0.500324	29.81	30.0858	6.25321	2.52111	2.2522	16.9228	15.9986	-1.38441	93.222	0.772482	0.460899	0.0567778	0.136134	0.0655276	0.0333696	0.0230535	0.0216428	0.0315577	0.0271649	0.0158173	0.0172079	0.0126581	0.0118159	0.012925	0.0148879	0.0153737	0.00943965	0.0100294	0.00999303	0.00820836	0.00788796	0.00853933	0.00852795
TCGA-BH-A0EI-01Z-00-DX1.929E126A-C9F8-4240-BF00-B6C4A57B7FF6-32-99852x88865-3120x2777.png	2777	314.259	681.048	1511.85	1469.89	1487.47	1445.23	1499.17	1457.05	2.3577	439.163	0.790044	18.8917	0.991409	0.521008	0.495819	29.595	29.6836	6.02161	2.44329	2.17461	16.5089	15.7254	0.939617	91.0765	0.756895	0.45417	0.0561093	0.133224	0.0641091	0.0326707	0.0227821	0.0213934	0.0304518	0.0269854	0.0155847	0.016951	0.0126933	0.0118118	0.012683	0.0144172	0.0153921	0.00935428	0.0100458	0.00998404	0.00829195	0.00788127	0.00856584	0.00855016
TCGA-BH-A0GY-01Z-00-DX1.E1AEAA36-94FA-41ED-851F-7BB11DD3C06D-32-122571x83858-3830x2620.png	2620	290.135	610.04	1815.53	1568.09	1791.14	1545.44	1802.83	1556.3	2.27804	399.086	0.791093	18.2111	0.990577	0.515905	0.493577	28.0979	28.2971	5.78573	2.35846	2.10189	15.8719	15.0124	2.92756	87.489	0.756013	0.452294	0.0565516	0.132161	0.0643878	0.0335765	0.0235278	0.0221753	0.0309401	0.026993	0.0160997	0.0171468	0.0128846	0.0119088	0.0129143	0.01463	0.0156073	0.00966975	0.0100537	0.0101139	0.00835097	0.00816365	0.00876012	0.00874523
TCGA-BH-A0GZ-01Z-00-DX1.9AD4F493-A0A9-499D-B667-B33333FC1A51-32-133104x93741-4159x2929.png	2929	290.015	628.95	1774.45	1253.04	1749.74	1229.74	1761.61	1240.88	2.29216	400.578	0.81163	18.2342	0.99301	0.503215	0.49192	29.2509	29.355	5.75681	2.35373	2.09553	15.5272	14.655	-1.51815	87.5899	0.752135	0.429059	0.0549983	0.127965	0.0643916	0.0333869	0.0219562	0.0232835	0.0317433	0.0272481	0.0164501	0.0166395	0.012152	0.0121519	0.0132804	0.0148556	0.0154504	0.00982531	0.0101362	0.00979238	0.00789981	0.00806445	0.00882848	0.00881715
TCGA-BH-A0H0-01Z-00-DX1.B3B394DD-1F4E-42CA-BB51-C002E423B3D0-32-121613x83354-3800x2604.png	2604	277.67	632.21	2129.31	1193.73	2103.06	1171.81	2115.69	1182.27	2.52378	396.068	0.826015	17.7706	0.993703	0.485473	0.457119	29.9965	29.9122	5.41243	2.22332	1.97084	14.9667	14.0907	-1.10595	89.6217	0.732121	0.401196	0.053105	0.120182	0.0621649	0.0341258	0.0213274	0.023473	0.031485	0.0268785	0.0169478	0.0167466	0.0116134	0.0125205	0.0136519	0.0149355	0.0153856	0.0100111	0.0102534	0.00985388	0.00770741	0.00841952	0.00876423	0.00898513
TCGA-BH-A0H3-01Z-00-DX1.C6D4DFB9-A4FA-40B2-90EF-75294CBC4523-32-113294x85043-3540x2657.png	2657	313.304	645.37	1303.42	1173.99	1278.82	1150.14	1290.62	1161.55	2.25218	421.466	0.79272	18.9043	0.989716	0.524437	0.495633	29.0335	29.3421	6.05459	2.44854	2.17835	16.2019	15.3922	3.39357	90.2788	0.767681	0.454868	0.0561977	0.134897	0.0644892	0.0328177	0.0229229	0.0223233	0.0313657	0.0267933	0.0157552	0.0169738	0.0125997	0.0118038	0.0129407	0.0145643	0.0154767	0.00953238	0.00997899	0.00998115	0.00811998	0.00795462	0.00855489	0.00856093
TCGA-BH-A0H5-01Z-00-DX1.28F24D4D-EE80-4EDA-BC30-A194E22FD61C-32-138257x88776-4320x2774.png	2774	291.714	636.511	2557.64	1350.1	2534.31	1325.72	2545.48	1337.39	2.51505	414.832	0.795051	18.1593	0.991681	0.506732	0.471255	28.8464	28.9354	5.68058	2.31201	2.04582	15.9332	15.1643	2.9914	90.6592	0.741345	0.439975	0.05578	0.12763	0.062947	0.0332811	0.0228406	0.0220522	0.0302491	0.0267411	0.0159504	0.0168218	0.0126048	0.0117976	0.0131365	0.0145088	0.0155316	0.00977859	0.0101697	0.00986753	0.0081675	0.00822393	0.00881718	0.00891514
TCGA-BH-A0H6-01Z-00-DX1.0CF7253A-B42C-4778-B1C6-17EC78A039ED-32-117783x84396-3680x2637.png	2637	249.13	554.951	1743.43	1480.59	1719.71	1459.16	1731.1	1469.39	2.35891	346.458	0.818787	16.9259	0.994922	0.499278	0.488179	28.0022	27.8906	5.28396	2.19606	1.9536	14.1205	13.4753	5.81616	82.2123	0.749321	0.418851	0.0535905	0.122475	0.0644347	0.0331725	0.021274	0.0236193	0.0307952	0.0274881	0.0166195	0.0164274	0.0118975	0.0122876	0.0136025	0.0149551	0.0159177	0.00978605	0.0101482	0.00967035	0.00794112	0.00813474	0.00900577	0.00901455
TCGA-BH-A0H7-01Z-00-DX1.21502FEA-DB37-4630-BA42-778DDF3A6D17-32-132147x88645-4129x2770.png	2770	285.879	608.633	1897.84	1234.79	1873.63	1211.85	1885.23	1222.8	2.34112	393.932	0.805188	18.1053	0.991115	0.509804	0.4816	28.5059	28.6806	5.67209	2.31784	2.06435	15.5001	14.6621	1.36479	88.1893	0.753528	0.43762	0.0550311	0.130487	0.0648812	0.0336061	0.0222824	0.0229865	0.0315785	0.0273607	0.0163893	0.0168732	0.0125034	0.0119224	0.0132476	0.0150072	0.0157203	0.0097528	0.0100636	0.0100436	0.00811659	0.00808544	0.00877419	0.00893346
TCGA-BH-A0H9-01Z-00-DX1.8AE869C6-5C78-4D52-AC8B-5B6FD5FD91AA-32-115868x83132-3620x2597.png	2597	295.435	626.371	2003.55	1379.99	1978.35	1357.31	1990.48	1368.16	2.3804	410.006	0.797833	18.3553	0.991339	0.507559	0.476045	28.8126	28.9737	5.75021	2.33924	2.07574	15.9747	15.0859	-2.04615	89.8525	0.746316	0.439926	0.0552374	0.12895	0.0635645	0.0338176	0.0232573	0.0223004	0.0309203	0.0269519	0.0162048	0.0171666	0.0128582	0.0116406	0.0133516	0.0147826	0.0155556	0.00967947	0.0102434	0.0101585	0.008175	0.00820845	0.00872512	0.00879367
TCGA-BH-A0HA-01Z-00-DX1.5A2F5C86-E1E7-445D-A4E3-29980FA37708-32-107533x88596-3360x2768.png	2768	305.644	612.575	1709.32	1488.33	1686.65	1463.7	1697.48	1475.5	2.20987	410.902	0.778526	18.7168	0.988366	0.530551	0.502635	27.8513	28.212	6.03441	2.44451	2.17654	16.4224	15.5765	-1.7297	88.4772	0.766719	0.471718	0.0569378	0.137959	0.0650327	0.0328859	0.0239071	0.0211312	0.0309452	0.0271419	0.0156557	0.0172433	0.0130623	0.0116927	0.012734	0.0147741	0.015467	0.00951279	0.0100977	0.0101149	0.00853735	0.00795836	0.0086481	0.00867929
TCGA-BH-A0HB-01Z-00-DX1.F90F7139-B804-4548-9FAF-9B475BF225EB-32-119698x93819-3740x2931.png	2931	286.155	601.76	2077.13	1448.43	2052.89	1425.83	2064.51	1436.64	2.37014	393.072	0.791869	18.064	0.992446	0.509792	0.477376	27.9649	28.2273	5.70706	2.32365	2.05922	15.7473	14.9274	5.62226	88.0808	0.749657	0.445759	0.0557662	0.13124	0.0633753	0.0333475	0.02307	0.0222287	0.0306557	0.026795	0.0161565	0.0169727	0.0127982	0.0121282	0.0130505	0.0147141	0.0155167	0.00978135	0.0100707	0.0101298	0.00837781	0.00824836	0.0088762	0.00882828
TCGA-BH-A0HF-01Z-00-DX1.1EB2F7CE-54F4-4E41-A3CF-78209770B7CE-32-105334x65594-3291x2049.png	2049	312.556	762.405	1243.65	1040.47	1218.52	1014.53	1230.58	1026.99	2.6767	466.872	0.795588	18.8288	0.989905	0.491575	0.466513	31.1796	30.9944	5.85507	2.36499	2.09125	16.8422	15.9804	-2.38943	95.4857	0.725836	0.431418	0.0552592	0.125516	0.0609412	0.0325986	0.0225098	0.0214439	0.0295538	0.0261134	0.0153131	0.0164707	0.0123636	0.0116072	0.0125568	0.0145241	0.0149725	0.00963032	0.00982657	0.00997425	0.00807668	0.00793268	0.00862205	0.008621
TCGA-BH-A0HI-01Z-00-DX1.89DB9F79-0DCC-4C65-831E-96AE026C2C4E-32-114910x74207-3590x2318.png	2318	330.189	684.325	1702.21	1101.23	1675.93	1077.68	1688.54	1088.95	2.24815	446.308	0.792204	19.4156	0.988164	0.522743	0.495815	29.7643	30.1427	6.21787	2.50165	2.23064	16.763	15.8285	-1.59667	92.8017	0.76584	0.455167	0.0560212	0.136009	0.0644391	0.0330546	0.0225273	0.0216568	0.0314539	0.0269007	0.0157286	0.0167697	0.0124055	0.0119236	0.0128712	0.0149524	0.0152552	0.0094516	0.00993938	0.00990326	0.00809145	0.0078466	0.00866317	0.00864243
TCGA-BH-A0HK-01Z-00-DX1.019036F5-647A-4EC4-8479-F2C100291AEF-32-133104x84302-4159x2634.png	2634	320.763	658.623	2441.84	1402.87	2418.49	1377.41	2429.68	1389.65	2.34619	440.375	0.780762	19.0844	0.989069	0.520609	0.481068	28.8751	29.1508	6.03716	2.43479	2.16213	16.9231	15.9883	-2.32415	92.8156	0.75274	0.4622	0.0560166	0.134483	0.0640587	0.0329323	0.0239005	0.0209911	0.030925	0.0270192	0.0156144	0.0172802	0.0130527	0.0117537	0.0128384	0.0147428	0.0154274	0.00956913	0.0100961	0.0101668	0.00851654	0.00798784	0.00865555	0.00867693
TCGA-BH-A0HL-01Z-00-DX1.972DE96D-51F4-4A2D-B074-8D965023DC01-32-116825x93579-3650x2924.png	2924	288.424	599.05	1768.91	1235.35	1744.73	1212.71	1756.34	1223.54	2.38759	396.547	0.791863	18.1697	0.992693	0.515603	0.47645	27.9327	28.1862	5.71745	2.32629	2.06341	15.8621	15.0547	-0.286465	89.0273	0.751772	0.449064	0.0566204	0.131628	0.0643621	0.0336332	0.0231332	0.0221328	0.0310401	0.0270996	0.0158865	0.0170944	0.0129009	0.0119183	0.0131272	0.014739	0.0157174	0.00975704	0.0102099	0.010115	0.00826983	0.00818553	0.0088338	0.00883883
TCGA-BH-A0HN-01Z-00-DX1.4997F641-C593-41F6-82ED-6A0E4EFA55F3-32-132147x78445-4129x2451.png	2451	305.444	626.589	2000.48	1222.08	1976.34	1198.5	1987.92	1209.8	2.21022	411.638	0.789322	18.7077	0.990917	0.526142	0.503887	28.4593	28.7038	5.99769	2.4333	2.17189	16.1662	15.3436	-1.94412	88.6549	0.769064	0.461871	0.0569796	0.134837	0.0653401	0.0335159	0.0232648	0.0216395	0.0313357	0.027337	0.0159468	0.0168616	0.0128227	0.0116464	0.0129146	0.0148146	0.0156533	0.00956358	0.00996016	0.0100343	0.00837078	0.00774596	0.00864194	0.00869384
TCGA-BH-A0HO-01Z-00-DX1.D3D66547-F5D4-40F5-B737-2FECEEB35ACB-32-118740x93822-3710x2931.png	2931	323.175	680.951	1808.09	1809.95	1782.19	1785.98	1794.65	1797.48	2.31617	437.852	0.809845	19.167	0.992307	0.51612	0.486345	30.439	30.6772	6.04981	2.44888	2.18017	16.0694	15.2323	7.74629	92.7949	0.764517	0.434307	0.054177	0.13138	0.0644473	0.0328913	0.0215801	0.0235064	0.032059	0.0268271	0.0157092	0.0164724	0.0120845	0.0122501	0.0132463	0.0149842	0.0153451	0.00950772	0.00988838	0.00975486	0.00783411	0.00800578	0.00861419	0.00867356
TCGA-BH-A0HP-01Z-00-DX1.F1FF6E88-B2D1-40AA-8373-1714D82E666F-32-117783x92555-3680x2892.png	2892	326.762	681.062	1343.58	1866.8	1317.95	1842.73	1330.25	1854.24	2.31642	447.335	0.79555	19.2757	0.985225	0.517107	0.482266	29.7407	30.0734	6.07869	2.4512	2.18004	16.7168	15.7331	4.12569	93.6616	0.757423	0.448314	0.0553508	0.134207	0.0646819	0.0331705	0.0226753	0.0223821	0.0317776	0.0268044	0.0159325	0.0169372	0.0125464	0.0119341	0.0130441	0.014965	0.0153325	0.00953645	0.010105	0.0100371	0.00813877	0.00788747	0.00866485	0.00872487
TCGA-BH-A0HQ-01Z-00-DX1.0921FCEF-20A2-4D4B-A198-91AF9F6C814C-32-115868x82108-3620x2565.png	2565	314.094	669.875	1568.21	1408.87	1541.61	1386.13	1554.41	1396.99	2.25965	424.691	0.810903	18.9262	0.99087	0.515677	0.4963	30.0977	30.3601	5.98962	2.43238	2.17142	15.8099	14.9718	-3.61312	90.7724	0.76808	0.435851	0.0536965	0.132797	0.0647702	0.0327376	0.0215666	0.0236165	0.0318616	0.0273179	0.0158707	0.0165951	0.0119672	0.0119224	0.0132435	0.0150142	0.0155384	0.00952936	0.00996312	0.00979548	0.00771894	0.0079351	0.00863978	0.0086114
TCGA-BH-A0HU-01Z-00-DX1.73B38904-E4F8-4F45-BD75-A27EC833B6DE-32-94801x81467-2962x2545.png	2545	330.523	710.772	1546.53	1318.72	1519.62	1295.01	1532.57	1306.37	2.36084	458.19	0.802158	19.365	0.986358	0.510028	0.479531	30.618	30.8886	6.07468	2.44847	2.17744	16.7003	15.7329	0.286923	94.9934	0.753316	0.43712	0.0557043	0.130814	0.0635434	0.0339789	0.0223655	0.0224637	0.0313727	0.0268255	0.0163783	0.0167602	0.0122021	0.0118531	0.0132116	0.0149816	0.0152791	0.00978169	0.0100756	0.00982602	0.00799767	0.00801851	0.00858363	0.00874546
TCGA-BH-A0HW-01Z-00-DX1.44DCCE00-133F-4469-A4DA-5057C011B4AC-32-121613x93806-3800x2931.png	2931	322.174	686.468	1948.79	1561.24	1922.9	1537.22	1935.36	1548.74	2.36717	441.366	0.803051	19.1454	0.990278	0.50845	0.476347	30.1352	30.3366	6.01054	2.42556	2.15986	16.4558	15.5158	3.79422	93.6543	0.755281	0.438229	0.0552034	0.131002	0.0640182	0.033582	0.0225624	0.0222901	0.0316906	0.026864	0.0161338	0.016925	0.0122979	0.011865	0.0131629	0.0149304	0.0152414	0.00966729	0.0099724	0.0100099	0.00790531	0.00792149	0.008578	0.00872214
TCGA-BH-A0HX-01Z-00-DX1.44EBA39E-383D-4820-915E-4E5FDA1D43DA-32-117783x85157-3680x2661.png	2661	308.476	635.775	1903.04	1284.66	1877.76	1261.67	1889.92	1272.69	2.23027	415.286	0.797074	18.8209	0.989463	0.527502	0.498966	29.1136	29.4102	5.99701	2.43493	2.17545	15.9818	15.159	-1.39702	89.6713	0.769884	0.453027	0.0545633	0.136127	0.0649789	0.0325391	0.0223131	0.0224153	0.0317264	0.0272025	0.0156494	0.0166291	0.0123505	0.0118463	0.0130133	0.0150071	0.0155583	0.00950867	0.00989431	0.0099351	0.00808161	0.00793233	0.00869165	0.00867169
TCGA-BH-A0HY-01Z-00-DX1.D7A1BF42-F268-4220-B71B-354CE2AF32D8-32-121613x93807-3800x2931.png	2931	305.545	635.253	1794.27	1761.21	1769.25	1738.08	1781.22	1749.16	2.23993	413.818	0.796695	18.7102	0.989929	0.521651	0.499379	28.9122	29.2116	5.96337	2.42379	2.16169	16.0314	15.1741	-2.79096	89.2155	0.765772	0.451592	0.0551011	0.134675	0.0648069	0.0329564	0.0224304	0.0227132	0.0314176	0.0272911	0.0157689	0.0167746	0.0124398	0.0118116	0.0129608	0.0149717	0.0154505	0.00953883	0.00996714	0.00984424	0.00815833	0.0079837	0.00866594	0.00868184
TCGA-BH-A0RX-01Z-00-DX1.B4ABAFB9-6696-4F22-9468-DA56E1AD32D3-32-113952x93597-3561x2924.png	2924	331.711	685.108	1832.99	1295.62	1805.98	1272.67	1818.99	1283.65	2.32811	451.262	0.799649	19.3915	0.990025	0.522149	0.480405	30.1619	30.457	6.11325	2.46161	2.18898	16.6153	15.6859	0.0531792	94.4847	0.761182	0.445561	0.0550546	0.133757	0.0644216	0.0331785	0.0221441	0.0223255	0.0317118	0.0269745	0.0158603	0.0166872	0.0123464	0.011727	0.013026	0.0149767	0.0154184	0.00961806	0.00994181	0.00995531	0.00809021	0.00785427	0.00859923	0.00873027
TCGA-BH-A0W3-01Z-00-DX1.38DCA2B7-1A54-4FFA-BABA-29F80974BB17-32-130231x90954-4069x2842.png	2842	300.855	629.387	2187.1	1661.09	2162.86	1637.44	2174.45	1648.76	2.30224	409.169	0.795355	18.5259	0.991422	0.513352	0.487154	28.6861	28.9108	5.85552	2.3852	2.12185	15.9715	15.1233	3.02116	89.2249	0.758137	0.448166	0.0553716	0.132246	0.0642125	0.0331139	0.023105	0.0222167	0.0312546	0.0269578	0.0160064	0.0169268	0.012798	0.011851	0.0130579	0.0148832	0.0155211	0.00964868	0.0100985	0.0100884	0.00822862	0.00803182	0.00873637	0.00873961
TCGA-BH-A0W4-01Z-00-DX1.23E017DC-15CB-4838-AC91-CFB11B932AB0-32-126401x90976-3950x2843.png	2843	314.273	656.625	1604.64	1228.65	1579.82	1204.47	1591.76	1216.07	2.29703	426.233	0.801903	18.9205	0.988527	0.512767	0.487474	29.5052	29.7572	6.01046	2.43583	2.16107	16.2098	15.3175	-3.01976	90.7708	0.757625	0.440991	0.0543359	0.132669	0.0643893	0.0328675	0.0221962	0.0230103	0.0317007	0.0268854	0.0159639	0.0166859	0.0123702	0.0120258	0.0131491	0.0149097	0.0154769	0.00966461	0.009989	0.00984316	0.00806422	0.00794019	0.00855126	0.00873072
TCGA-BH-A0W5-01Z-00-DX1.84EA3913-667B-4694-A0F0-E629CAC615C8-32-125444x79759-3920x2492.png	2492	302.864	627.131	2088.64	1273.14	2064.74	1249.27	2076.22	1260.69	2.28044	412.62	0.792033	18.5926	0.991549	0.520502	0.492563	28.5167	28.8395	5.93312	2.40446	2.13877	16.1145	15.257	-2.57217	89.3236	0.759786	0.453476	0.0565819	0.133951	0.0643737	0.0333539	0.0228772	0.0221149	0.0310431	0.0270745	0.0159777	0.0167574	0.0127558	0.011856	0.0129005	0.0147843	0.0155853	0.00964182	0.00997633	0.00995104	0.00821054	0.00795864	0.00873533	0.00868663
TCGA-BH-A0W7-01Z-00-DX1.93F11232-A1FB-4682-B744-3531D4DF11AF-32-125444x90981-3920x2843.png	2843	299.893	635.405	2577.31	1195.55	2552.65	1172.07	2564.5	1183.3	2.36965	412.399	0.798817	18.4678	0.986171	0.507834	0.481973	28.9958	29.1882	5.81327	2.36748	2.10079	15.9721	15.1457	3.04342	89.6755	0.749374	0.439606	0.0551529	0.129671	0.0635399	0.0331426	0.0225828	0.0223932	0.0309242	0.0267365	0.0160134	0.0167111	0.0125058	0.0117984	0.0131578	0.014829	0.015518	0.00967555	0.0100245	0.0100562	0.00819646	0.00817367	0.00886005	0.00877813
TCGA-BH-A0WA-01Z-00-DX1.C0EB7B73-5529-49EC-B660-3F849B041963-32-77564x66779-2423x2086.png	2086	338.845	725.18	1344.85	834.274	1318.39	809.678	1331.12	821.447	2.41414	469.225	0.795166	19.5925	0.987337	0.509669	0.470612	30.5963	30.847	6.15382	2.4631	2.17915	17.1342	16.0765	-7.26954	96.9229	0.750718	0.445527	0.05519	0.132708	0.0636688	0.0331235	0.0226851	0.021481	0.0313618	0.026745	0.0157763	0.017012	0.0124202	0.0113925	0.0128129	0.0149115	0.0152061	0.00955608	0.00996915	0.00992811	0.00817477	0.00783676	0.00854833	0.0088615
TCGA-BH-A1EN-01Z-00-DX1.F535657F-E2FA-4283-87AE-7DAB663B196B-32-141137x84475-4410x2639.png	2639	163.673	362.647	2111.47	1202.09	2093.26	1183.44	2101.89	1192.24	2.54959	236.329	0.808669	13.8631	0.998756	0.489993	0.455033	22.7708	22.2357	4.15476	1.80618	1.56017	11.9596	11.6904	1.51778	69.8784	0.720452	0.424834	0.0564276	0.109897	0.0671587	0.0350674	0.0239054	0.023863	0.0294306	0.0297458	0.0181816	0.0175616	0.0133867	0.0133404	0.0144917	0.0149684	0.0174822	0.0111452	0.0114125	0.0105856	0.00887185	0.0100506	0.0103107	0.0102054
TCGA-BH-A1ES-01Z-00-DX1.C54C809F-748F-4BB0-B018-A8A83A4134C0-32-92171x61592-2880x1924.png	1924	261.9	544.775	1633.94	894.6	1611.39	872.441	1622.14	883.037	2.46863	361.765	0.791835	17.235	0.995687	0.507292	0.468378	26.7025	26.9184	5.41222	2.21485	1.94365	15.0518	14.4117	-3.02432	85.5342	0.742745	0.441387	0.0571964	0.126635	0.0633289	0.0339174	0.0231942	0.0228689	0.0298103	0.0269552	0.0165897	0.0167654	0.0129238	0.0122333	0.0134424	0.014597	0.0156441	0.00997649	0.0103843	0.0101554	0.00837933	0.00848208	0.00920556	0.00914467
TCGA-BH-A1ET-01Z-00-DX1.05C126CD-CC10-44BF-9A68-6CDDE97272B2-32-135377x74380-4230x2324.png	2324	310.306	643.467	2116.09	1183	2093.7	1157.3	2104.38	1169.67	2.19449	420.353	0.781737	18.8892	0.99011	0.535731	0.513919	28.7147	28.9416	6.11215	2.48029	2.21469	16.3268	15.5352	-0.26391	88.7494	0.775099	0.472828	0.0564576	0.139065	0.0654163	0.0318401	0.0235052	0.0211891	0.0310544	0.0272002	0.0154847	0.0167235	0.0128659	0.0115537	0.0126304	0.0146165	0.015437	0.00939101	0.00982816	0.00994671	0.00835281	0.0076718	0.00862687	0.00854929
TCGA-BH-A1EU-01Z-00-DX1.5A0956EF-0100-47FD-9026-1994CF22D0F1-32-107533x72172-3360x2255.png	2255	300.745	599.544	1614.78	1064.5	1591.6	1040.95	1602.69	1052.22	2.1051	400.763	0.776604	18.616	0.990066	0.539056	0.51996	27.5193	27.822	6.04923	2.45843	2.20386	16.2407	15.4205	-1.15691	86.3344	0.777856	0.481441	0.0578769	0.139418	0.0660364	0.0328754	0.0241409	0.0209606	0.0309083	0.0273768	0.0155603	0.0171405	0.0132843	0.0115694	0.0125094	0.0146519	0.0156615	0.00947431	0.00997661	0.0101578	0.00854716	0.00798163	0.0085739	0.00853454
TCGA-BH-A1EV-01Z-00-DX1.106CF220-1D7D-40DD-88B2-A7F00B758F8F-32-118095x82505-3690x2578.png	2578	305.317	637.108	1837.21	1387.13	1814.4	1362.2	1825.3	1374.15	2.28092	416.507	0.782148	18.6926	0.990829	0.527314	0.494955	28.3202	28.5883	5.98448	2.42487	2.15898	16.3468	15.5341	-1.05588	89.4896	0.763977	0.466373	0.0571155	0.136038	0.0649198	0.0332327	0.0237837	0.0213986	0.0309234	0.0270341	0.0157043	0.0169313	0.0131168	0.0115423	0.0127656	0.0145782	0.015482	0.00955906	0.00999747	0.010094	0.00847542	0.0079364	0.00871772	0.00865822
TCGA-BH-A1EW-01Z-00-DX1.A6A5F9C5-FB97-4DA3-A1EA-1F84BC006681-32-113294x86054-3540x2689.png	2689	323.477	675.386	1617.21	895.342	1593.42	869.471	1604.83	881.863	2.24612	435.295	0.799726	19.253	0.988785	0.519567	0.494514	29.9006	30.2452	6.13055	2.47831	2.21069	16.3564	15.4953	-1.23821	91.9002	0.767848	0.446286	0.0546769	0.135391	0.0644433	0.0327736	0.022217	0.0226697	0.0318623	0.0269583	0.015763	0.0167531	0.0123319	0.0118439	0.0131094	0.0150303	0.0154596	0.00944343	0.00988148	0.0098079	0.00785944	0.00783839	0.00854865	0.00861853
TCGA-BH-A1EX-01Z-00-DX1.16B6A817-6729-446E-9FCF-A4A333C5295D-32-136337x82968-4260x2592.png	2592	319.62	701.554	2313.57	974.56	2288.71	949.784	2300.63	961.655	2.42018	450.676	0.788173	19.0311	0.990291	0.51792	0.488181	29.8586	29.9512	6.04136	2.44391	2.17289	16.7279	15.896	-1.43342	92.8655	0.755115	0.455517	0.0550661	0.133325	0.0638543	0.0321264	0.0227887	0.0212953	0.0306528	0.0266604	0.0155774	0.0166862	0.012802	0.0115	0.0127847	0.0144872	0.0152241	0.00943854	0.00985931	0.0100295	0.00824444	0.00785128	0.00849345	0.00842766
TCGA-BH-A1EY-01Z-00-DX1.25C3DE1F-C702-4959-8DFA-69EF78AD9307-32-87371x69184-2730x2162.png	2162	301.277	593.879	1318.76	1004.91	1294.19	982.9	1305.97	993.409	2.14354	401.18	0.772172	18.6224	0.990714	0.539562	0.515423	27.2402	27.6267	6.07571	2.46228	2.19402	16.3345	15.5262	4.85869	86.8263	0.774718	0.484503	0.0578285	0.140532	0.0654183	0.0326544	0.0239354	0.0209162	0.0304597	0.0270226	0.0154193	0.0170161	0.0133797	0.0115633	0.0124975	0.014428	0.0156431	0.00945433	0.00988951	0.0100708	0.00863046	0.00792587	0.00871611	0.00862199
TCGA-BH-A1F0-01Z-00-DX1.E1557A67-230A-4337-AEC8-158258A917FF-32-63368x47762-1980x1492.png	1492	303.304	594.923	946.243	707.942	922.404	685.448	933.841	696.162	2.1304	403.458	0.768467	18.6168	0.989293	0.541902	0.51422	26.9197	27.274	6.04821	2.45381	2.19381	16.4895	15.6443	2.25806	86.935	0.776201	0.492247	0.0590804	0.140737	0.0662797	0.033039	0.0244349	0.0200484	0.0305902	0.0275257	0.015165	0.0172175	0.0133612	0.0115065	0.0125412	0.0145424	0.0156025	0.00924474	0.00999363	0.0104537	0.00892142	0.00792948	0.00871114	0.00861814
TCGA-BH-A1F2-01Z-00-DX1.17E2FD6F-0DCF-425B-864B-21ADCDAE734B-32-93131x81301-2910x2540.png	2540	307.518	619.23	1590.21	1425.49	1566.17	1401.97	1577.69	1413.24	2.2198	411.302	0.788632	18.746	0.993633	0.528801	0.499434	28.3116	28.6113	6.02833	2.44453	2.17605	16.1871	15.3809	-2.04128	88.7799	0.769757	0.462045	0.0554743	0.136784	0.0652826	0.0325869	0.0231611	0.0217976	0.0314356	0.0275323	0.0155809	0.0168736	0.0128609	0.0115929	0.0128808	0.0147738	0.0157561	0.0095249	0.00993948	0.0099654	0.00822809	0.00793041	0.00865263	0.00863169
TCGA-BH-A1F5-01Z-00-DX1.9A1AA3BB-80B1-473D-B075-8D65A94C4E0B-32-128656x88799-4020x2774.png	2774	287.728	587.09	2263.81	1376.04	2239.71	1353.73	2251.25	1364.36	2.22641	389.154	0.794608	18.1675	0.991812	0.530592	0.504579	27.9619	28.1987	5.79207	2.36779	2.11602	15.5367	14.7776	5.41532	86.3971	0.76759	0.455828	0.0557855	0.134326	0.0655073	0.0329253	0.0229674	0.0223751	0.0312497	0.0276453	0.0158241	0.0170114	0.0126961	0.0119608	0.0130545	0.0148704	0.015857	0.00962002	0.0100275	0.0100162	0.00824008	0.00812351	0.0087889	0.00884116
TCGA-BH-A1F6-01Z-00-DX1.E83F0DC0-EA2C-4641-81B0-8702B9C5D579-32-117134x83520-3660x2610.png	2610	311.642	624.495	1520.91	1158.12	1496.36	1134.98	1508.16	1146.05	2.21289	419.22	0.77942	18.8533	0.991112	0.530098	0.50365	28.2011	28.5155	6.07362	2.45973	2.19387	16.5276	15.6826	2.95008	89.0811	0.765165	0.469133	0.0563908	0.137165	0.0647067	0.0326469	0.0236786	0.0212161	0.0310012	0.0273196	0.0155938	0.017092	0.0132338	0.0117555	0.0129095	0.0149026	0.0155523	0.0094746	0.00996772	0.0101192	0.00848061	0.00786608	0.0087395	0.0086971
TCGA-BH-A1F8-01Z-00-DX1.8BB026F7-35CB-483F-B665-4C3A3EF47E1B-32-185303x83614-5790x2612.png	2612	273.732	593.282	3043.58	1325.4	3020.87	1301.83	3031.74	1313.11	2.46446	382.977	0.798492	17.6435	0.992595	0.50104	0.467283	27.7537	27.9722	5.50304	2.24865	1.98525	15.3529	14.5964	4.07241	87.8838	0.742616	0.435383	0.0558712	0.127668	0.0634686	0.0339541	0.0225518	0.0230255	0.0306564	0.0271086	0.0164318	0.0169162	0.0124718	0.0122292	0.0133058	0.0146649	0.0157039	0.00990912	0.0103407	0.0100574	0.00822628	0.00837718	0.00901842	0.00900094
TCGA-BH-A1FB-01Z-00-DX1.9D778D1A-07F6-450D-B7AA-0E17B4D0A88C-32-136337x86760-4260x2711.png	2711	315.157	638.938	2588.07	1294.05	2563.57	1270.36	2575.34	1281.72	2.24514	422.913	0.787995	18.9235	0.990521	0.52683	0.498464	28.7335	29.0553	6.07213	2.4601	2.1898	16.3517	15.5124	-4.98612	90.006	0.76781	0.4605	0.0557048	0.13606	0.0647867	0.0325495	0.0229238	0.0222295	0.0312924	0.027211	0.0156293	0.0168008	0.0126936	0.0118986	0.0128888	0.0146558	0.0154995	0.00947911	0.00987798	0.00992615	0.00825323	0.00791788	0.00865877	0.0086814
TCGA-BH-A1FC-01Z-00-DX1.B816A21B-1559-42F5-902A-A1532E59C015-32-115214x69373-3600x2167.png	2167	296.213	620.535	1422.67	1021.37	1398.53	998.016	1410.11	1009.19	2.37482	408.954	0.792837	18.3509	0.991556	0.511823	0.474743	28.3679	28.5909	5.77438	2.34472	2.078	16.0964	15.1931	2.29605	89.8325	0.748403	0.447339	0.0564719	0.131396	0.0638812	0.0337122	0.0230999	0.0215806	0.0310422	0.0266622	0.0161478	0.0171726	0.0129919	0.0117347	0.0131126	0.0146695	0.0155928	0.0097101	0.0102192	0.010004	0.00842046	0.00805706	0.00871484	0.00877197
TCGA-BH-A1FE-01Z-00-DX1.8FB57ECF-350B-44E4-8612-63E8374D3C4B-32-72969x87411-2280x2731.png	2731	312.191	620.11	1323.54	1203.05	1300.69	1178.42	1311.62	1190.26	2.15552	414.947	0.773999	18.8984	0.989156	0.537813	0.513126	27.9527	28.3308	6.14937	2.48897	2.21861	16.4801	15.6904	0.0110061	88.3213	0.774713	0.479275	0.0574244	0.139459	0.0649485	0.032446	0.023873	0.0208808	0.0305606	0.0271296	0.0154808	0.0169162	0.0131763	0.0116309	0.0126311	0.0145159	0.0155195	0.00941189	0.0099952	0.0101801	0.00859718	0.00791941	0.00867265	0.00858535
TCGA-BH-A1FG-01Z-00-DX1.DA665FB6-9DD9-4B18-A925-2EFD9BC4C43B-32-102733x83047-3210x2595.png	2595	301.121	611.591	971.371	1197.38	949.658	1171.89	959.973	1184.11	2.23465	406.606	0.794322	18.4889	0.990968	0.528523	0.502827	28.3865	28.6361	5.91615	2.40878	2.15205	15.8502	15.0831	-4.9406	87.9746	0.767626	0.454587	0.0553367	0.134068	0.0649198	0.0328031	0.0223959	0.0224927	0.0311532	0.0272749	0.0156606	0.0167835	0.0125565	0.0121926	0.0130688	0.014828	0.0157037	0.00971453	0.0101499	0.00980438	0.00814931	0.00820509	0.0087893	0.00875523
TCGA-BH-A1FH-01Z-00-DX1.F90A691F-B6DB-4C4A-9975-9A2CB01F29E2-32-103693x76727-3240x2397.png	2397	325.005	674.871	1747.9	1209.34	1721.6	1186.02	1734.25	1197.17	2.32704	444.67	0.794902	19.2669	0.990214	0.518616	0.482337	29.7317	30.0557	6.08864	2.45444	2.18609	16.687	15.7712	-3.00232	93.5667	0.758558	0.449123	0.055737	0.134037	0.0645051	0.0332925	0.022752	0.0220791	0.0317395	0.0268813	0.0159974	0.0170912	0.0124139	0.0116003	0.0128685	0.0148425	0.0154093	0.00956123	0.0100121	0.00990548	0.00815401	0.00780929	0.00859145	0.00867091
TCGA-BH-A18F-01Z-00-DX1.81A81589-2D77-4CD6-BD34-76E292AA031D-32-90970x82004-2842x2562.png	2562	306.124	619.401	1774.61	1276.24	1750.06	1253.15	1761.85	1264.19	2.23017	411.673	0.79224	18.7186	0.989777	0.526189	0.496261	28.4059	28.698	5.98487	2.4273	2.16529	16.1765	15.3013	-5.08085	88.9868	0.765575	0.459295	0.0558761	0.136046	0.0654231	0.0328675	0.0230055	0.0218696	0.0314824	0.0270493	0.0156695	0.0168324	0.0129365	0.0116422	0.0129295	0.0146889	0.0154467	0.00961121	0.010024	0.0102408	0.00839618	0.0080133	0.00870862	0.00864412
TCGA-BH-A18G-01Z-00-DX1.DB2B5819-CE83-4E07-BD03-2CD9CF2E246C-32-49794x42712-1556x1334.png	1334	349.938	688.057	684.515	647.97	658.578	624.057	671.033	635.558	2.12255	462.42	0.776615	20.0119	0.989817	0.5437	0.513118	29.156	29.5425	6.51649	2.60773	2.33168	17.5364	16.6092	-0.841071	93.4965	0.782727	0.488029	0.0581691	0.141594	0.0671009	0.0329244	0.0246841	0.0202794	0.0313832	0.0268408	0.0151464	0.0173121	0.0131549	0.0112862	0.0123221	0.0145656	0.0154361	0.00931122	0.00991249	0.00987976	0.00834567	0.00769304	0.00855619	0.00830399
TCGA-BH-A18H-01Z-00-DX1.4EC9108F-04C2-4B28-BD74-97A414C9A536-32-131189x90946-4099x2842.png	2842	313.032	684.963	2135.8	1492.97	2113.2	1465.44	2124	1478.7	2.48716	440.849	0.815594	18.8075	0.992393	0.495572	0.462037	30.8323	30.9724	5.8268	2.36439	2.08853	16.0825	15.1908	2.12053	93.54	0.736781	0.412817	0.0542215	0.124283	0.0621877	0.0336712	0.021418	0.0231372	0.0314256	0.0267748	0.0163785	0.0165711	0.0117752	0.0122506	0.0133473	0.0150122	0.0153308	0.00987153	0.0100528	0.0097719	0.00773217	0.00809385	0.00864992	0.00885364
TCGA-BH-A18I-01Z-00-DX1.EE699DE3-EBF4-4AB4-8319-9911F027FA18-32-100546x84748-3142x2648.png	2648	311.94	649.771	1480.95	1514.71	1457.93	1488.99	1468.95	1501.37	2.28028	422.896	0.798367	18.8786	0.988068	0.518603	0.490863	29.3319	29.6359	5.99295	2.42844	2.15588	16.1293	15.2757	-1.68446	90.7292	0.763001	0.4459	0.0551972	0.13373	0.0643023	0.0331014	0.0223332	0.0227049	0.0316639	0.0270608	0.0159302	0.016723	0.01242	0.0118062	0.0131344	0.0147982	0.0154262	0.0096081	0.00989535	0.00999533	0.00808598	0.0077947	0.00862828	0.00872591
TCGA-BH-A18J-01Z-00-DX1.AE20ADB6-050C-405D-BF17-1EE4A1A4979A-32-109165x76795-3411x2399.png	2399	210.757	481.387	1713.41	1282.47	1692.34	1261.28	1702.35	1271.38	2.86773	313.599	0.802546	15.602	0.996478	0.465007	0.406789	25.4181	25.383	4.58112	1.91778	1.64572	14.0575	13.3932	2.8714	83.3089	0.692161	0.405743	0.0546985	0.115145	0.0610666	0.0343722	0.023171	0.0230366	0.0294805	0.0267517	0.0172625	0.0175893	0.013167	0.0126664	0.0141393	0.0146743	0.0160311	0.0106064	0.011097	0.0105283	0.00874459	0.00889359	0.00969774	0.00949746
TCGA-BH-A18L-01Z-00-DX1.01D6E3EF-6857-4CC6-BEA1-0BBC1A0B728F-32-91928x80211-2872x2506.png	2506	274.851	582.809	1575.44	1390.9	1552.73	1367.65	1563.6	1378.77	2.3811	380.001	0.797551	17.6662	0.994126	0.505648	0.476583	27.5117	27.6948	5.53145	2.26636	2.00706	15.3972	14.5737	-3.86503	86.4741	0.746496	0.441645	0.0559408	0.128645	0.0643776	0.033541	0.0229953	0.0222421	0.0315094	0.027278	0.0163725	0.017122	0.0127481	0.0120297	0.013572	0.0148505	0.0158981	0.00987848	0.0103373	0.010013	0.00834435	0.00826167	0.00887773	0.0088526
TCGA-BH-A18M-01Z-00-DX1.56E6935A-62CB-4CBE-BDCA-60DA56422CE0-32-105334x78856-3291x2464.png	2464	319.017	691.212	1482.44	1250.77	1457.82	1225.89	1469.62	1237.83	2.2501	437.505	0.796307	19.1452	0.989423	0.52849	0.505694	29.9526	30.1331	6.11828	2.47771	2.21802	16.3081	15.4716	-0.620704	91.3417	0.773228	0.456762	0.0550176	0.137072	0.0654264	0.0322908	0.022308	0.0222029	0.031781	0.027098	0.0154158	0.0165386	0.0123707	0.0116878	0.0127239	0.0148384	0.0154975	0.00930306	0.00969563	0.00984772	0.00808105	0.00783935	0.0086225	0.0084607
TCGA-BH-A18N-01Z-00-DX1.FE0E24A1-8AE9-4021-B9C7-B408EE0DE329-32-121613x91000-3800x2843.png	2843	286.487	561.672	1776.93	1572.47	1754	1550.07	1764.97	1560.78	2.10934	377.892	0.774167	18.1552	0.994657	0.541428	0.530055	26.5598	26.8679	6.00276	2.44678	2.17575	15.8442	15.1438	0.602508	83.4116	0.779537	0.485372	0.0592585	0.13857	0.0660819	0.0330021	0.0240178	0.0209144	0.0297369	0.0269071	0.0158681	0.0168393	0.0132641	0.0118846	0.012547	0.0139733	0.0154289	0.00960742	0.00986681	0.00995819	0.00853484	0.0081063	0.00881146	0.00855217
TCGA-BH-A18P-01Z-00-DX1.C66642D3-BE44-4D65-B4AE-C1C3D959D22C-32-100546x91125-3142x2847.png	2847	309.181	628.323	1579.68	1416.53	1555.84	1392.53	1567.27	1404.02	2.23604	416.979	0.786274	18.7886	0.990134	0.525535	0.499315	28.3686	28.6765	6.03327	2.44486	2.17503	16.378	15.4835	0.869271	89.2914	0.765267	0.464055	0.0562191	0.136331	0.0651282	0.0324506	0.0231708	0.0214804	0.0310524	0.0269592	0.0156135	0.0170104	0.0128495	0.0118219	0.0128405	0.014595	0.0154381	0.00943575	0.00993344	0.0100741	0.00843662	0.00790442	0.00864847	0.00862718
TCGA-BH-A18Q-01Z-00-DX1.E89E49C7-D62A-4408-A3D9-19E79FCB249E-32-115868x82107-3620x2565.png	2565	333.963	650.02	1808.15	1490.34	1784.25	1465.6	1795.69	1477.47	2.0698	437.977	0.763139	19.6206	0.991262	0.547766	0.52808	28.2199	28.7214	6.50764	2.61258	2.32454	17.2692	16.4099	0.516255	89.9818	0.786201	0.496379	0.0587127	0.143681	0.0650607	0.0320405	0.0244905	0.0203609	0.0303101	0.0267745	0.0151594	0.0168758	0.0134564	0.0113761	0.0121684	0.0143049	0.0152054	0.00918743	0.00973351	0.0101154	0.00861542	0.00766463	0.00848824	0.00831808
TCGA-BH-A18R-01Z-00-DX1.07E6FA7F-5072-4327-9982-A40F010B7532-32-148426x57180-4638x1786.png	1786	293.399	609.199	2322.75	874.201	2299.33	850.647	2310.54	861.907	2.17377	395.586	0.796537	18.3827	0.994095	0.533171	0.524596	28.3705	28.5169	5.93946	2.43101	2.17659	15.6133	14.8983	-3.07552	85.821	0.779864	0.460564	0.0568034	0.135737	0.0664276	0.0331587	0.0228305	0.0222916	0.0314155	0.0276143	0.0157434	0.0165594	0.0124896	0.0118504	0.0128045	0.0145974	0.0157114	0.00942856	0.00978675	0.00972396	0.0080961	0.00791039	0.00870461	0.00851916
TCGA-BH-A18S-01Z-00-DX1.B36FC684-0010-4ABB-9E25-303C8DF1C4E2-32-112995x83145-3531x2598.png	2598	286.614	596.832	1579.02	1442.78	1555.35	1419.64	1566.71	1430.72	2.15968	381.827	0.81115	18.1064	0.993792	0.523711	0.520162	28.8519	28.7668	5.77687	2.38473	2.14291	14.9614	14.2816	-1.85173	84.4879	0.777633	0.443064	0.0549095	0.130248	0.0666484	0.0327551	0.0225129	0.0234751	0.0321989	0.0276444	0.0159084	0.0165103	0.0121497	0.0120343	0.013237	0.0147136	0.0157299	0.00966729	0.00985447	0.00957156	0.00799205	0.00804907	0.00883463	0.00870206
TCGA-BH-A18T-01Z-00-DX1.90123A74-F631-4538-AB2E-4076486ADF88-32-145553x89587-4548x2799.png	2799	290.235	607.515	2288.4	1447.51	2264.49	1424.45	2275.95	1435.49	2.45299	402.079	0.789495	18.1693	0.991296	0.509944	0.464482	27.9023	28.1462	5.67315	2.30337	2.03451	16.0005	15.1456	-1.28427	90.3877	0.744921	0.448792	0.0559768	0.13113	0.063929	0.0335702	0.0234372	0.0216225	0.0309325	0.0267347	0.0161995	0.0173055	0.0129754	0.0117009	0.0131212	0.0146748	0.0155593	0.00981302	0.0102673	0.0102439	0.00836687	0.00828253	0.00888156	0.00892362
TCGA-BH-A18U-01Z-00-DX1.63940315-59BC-462B-87A8-2BBB33C9503E-32-125444x90978-3920x2843.png	2843	304.085	612.184	1728.2	977.111	1704.25	953.816	1715.71	964.96	2.18104	406.562	0.785138	18.6576	0.991454	0.529894	0.505468	28.0032	28.2634	6.00205	2.44001	2.17571	16.2085	15.3562	1.61294	87.7618	0.770672	0.468925	0.0566489	0.137049	0.0655631	0.0326937	0.0237671	0.021368	0.0311645	0.0273538	0.015561	0.0169894	0.0129911	0.0116495	0.0126463	0.0146743	0.0155798	0.00946841	0.00996752	0.01012	0.00844958	0.00786664	0.00863319	0.00859249
TCGA-BH-A18V-01Z-00-DX1.7797760A-05CD-436E-97DA-31D6201F943B-32-103419x84731-3231x2647.png	2647	354.85	715.522	1644.03	1484.7	1618.95	1459.08	1631.01	1471.39	2.27526	479.473	0.772521	20.0505	0.987555	0.527808	0.485223	29.5541	30.0547	6.43469	2.56296	2.27695	17.8699	16.7964	-3.80724	96.7097	0.763641	0.47455	0.0571337	0.139646	0.0639988	0.0326136	0.024223	0.0206011	0.0307453	0.0264909	0.0153914	0.0174326	0.0131209	0.0114732	0.0127061	0.0146219	0.0151899	0.00942897	0.00988947	0.0101863	0.00849476	0.00774918	0.00850656	0.00863635
TCGA-BH-A1FJ-01Z-00-DX1.BCED4CEF-2B33-45BA-ABC7-29BEE818F4A3-32-141137x88770-4410x2774.png	2774	318.359	637.08	1938.34	1494.61	1915.06	1469.77	1926.2	1481.68	2.21819	427.865	0.778204	19.0549	0.991966	0.531507	0.500709	28.3311	28.7206	6.14814	2.48053	2.21076	16.7677	15.8837	-1.48964	90.3294	0.767021	0.471364	0.0572491	0.137439	0.0648496	0.0331051	0.0238222	0.0213945	0.0309245	0.027269	0.0157479	0.0171839	0.0131609	0.0116724	0.0127599	0.0147546	0.0155739	0.00951949	0.0100558	0.0101146	0.00852368	0.00803166	0.00862224	0.00867452
TCGA-BH-A1FL-01Z-00-DX1.D3E9F46E-9A28-4AAE-8C87-D6F1851227A3-32-148818x87237-4650x2726.png	2726	324.786	668.126	2050.85	1313.43	2027.74	1287.06	2038.76	1299.73	2.25929	439.837	0.795575	19.2722	0.989567	0.522692	0.491257	29.6277	30.064	6.15237	2.4796	2.20874	16.5724	15.6522	-4.91774	92.3358	0.764127	0.449309	0.0552023	0.135981	0.0640469	0.0330739	0.0223984	0.0225415	0.0317481	0.0267824	0.0156991	0.0167376	0.012381	0.0117422	0.0129312	0.0148347	0.0154191	0.00938809	0.00993861	0.00992277	0.00799605	0.00776155	0.00860719	0.00859783
TCGA-BH-A1FM-01Z-00-DX1.860C5169-FE2B-43A6-A13D-E736374303DD-32-81610x75768-2550x2367.png	2367	288.997	642.573	1338.28	1009.1	1314.76	984.453	1326.04	996.267	2.60568	410.736	0.808297	18.1237	0.994081	0.491385	0.448412	29.2043	29.3267	5.52858	2.25022	1.98464	15.7498	14.9015	1.21526	92.5568	0.732616	0.42018	0.0542713	0.124118	0.0631035	0.0337782	0.0219247	0.0234209	0.0316126	0.0269407	0.0164047	0.0168448	0.012202	0.0124081	0.0137592	0.0150241	0.0155087	0.00997723	0.0102947	0.00988832	0.00800654	0.00844886	0.00889118	0.00907376
TCGA-BH-A1FN-01Z-00-DX1.CEE3C59B-6CF0-4D41-8334-6067BB5A8BF7-32-90251x83834-2820x2619.png	2619	336.834	669.949	1394.94	1129.12	1369.96	1104.86	1381.96	1116.47	2.12576	445.93	0.778506	19.6113	0.990791	0.540301	0.515019	28.9941	29.4382	6.37434	2.56792	2.29492	17.0399	16.1712	-1.70099	91.465	0.782221	0.477229	0.057326	0.140992	0.0653755	0.0326538	0.0235015	0.0210993	0.0314479	0.0271543	0.0152955	0.0167866	0.0129168	0.0116022	0.0126341	0.0146506	0.0154338	0.00939403	0.00980766	0.00993673	0.00828649	0.0077528	0.00850658	0.00845408
TCGA-BH-A1FR-01Z-00-DX1.03E51FCD-DDF2-4924-827D-85A02280C9C7-32-121935x88814-3810x2775.png	2775	338.206	690.902	1580.28	1573.85	1555.8	1548.4	1567.56	1560.6	2.29193	458.098	0.783524	19.5899	0.989443	0.522649	0.484135	29.503	29.9303	6.23329	2.49998	2.2223	17.2305	16.2556	-2.88544	94.6407	0.76129	0.460722	0.0565405	0.136282	0.0640513	0.0335079	0.0236845	0.0215711	0.0313203	0.0270011	0.0159375	0.0174389	0.0128557	0.0116957	0.0127932	0.0149096	0.0153309	0.00953916	0.0101321	0.0100519	0.00837574	0.00777599	0.00853575	0.00866209
TCGA-BH-A1FU-01Z-00-DX1.3D195750-8C9E-48C6-92EC-44AC6AB56267-32-59370x65354-1855x2042.png	2042	318.783	653.029	851.642	828.814	826.663	805.191	838.673	816.538	2.28297	431.275	0.782795	19.0492	0.990133	0.522081	0.490306	28.5933	29.0611	6.12163	2.46142	2.18194	16.694	15.8321	-0.500961	91.5777	0.763123	0.462157	0.0574345	0.136014	0.0640331	0.033192	0.0234032	0.0217331	0.0309918	0.0269673	0.0157971	0.017096	0.0127215	0.0116867	0.0129824	0.0146213	0.0153847	0.00947798	0.0100648	0.0101295	0.00844026	0.00782769	0.0086691	0.00875829
TCGA-BH-A201-01Z-00-DX1.6D6E3224-50A0-45A2-B231-EEF27CA7EFD2-32-121856x94697-3808x2959.png	2959	266.897	575.881	1862.83	1496.9	1838.9	1474.82	1850.39	1485.36	2.40508	371.913	0.804985	17.4588	0.993974	0.496544	0.471273	27.7951	27.9522	5.4562	2.2417	1.98199	15.0987	14.3367	-0.706178	85.5196	0.738541	0.426092	0.0554187	0.12528	0.0633434	0.0341337	0.0228861	0.0232298	0.0309402	0.0271489	0.0168371	0.0171982	0.0125831	0.012145	0.0136795	0.0148332	0.0157282	0.00996273	0.0104131	0.0101055	0.00817268	0.00831835	0.00890858	0.00901989
TCGA-BH-A202-01Z-00-DX1.8CECDB74-5E6F-4CE8-B52C-A89E574F38FB-32-125664x91724-3927x2866.png	2866	342.05	707.43	2139.16	1258.64	2113.97	1233.32	2126.1	1245.5	2.31145	466.249	0.787066	19.6662	0.990375	0.516202	0.481053	29.9652	30.2652	6.25203	2.50817	2.22461	17.284	16.2576	-0.689438	95.1104	0.755752	0.456006	0.0561189	0.134213	0.0639516	0.0331715	0.0230747	0.0216222	0.0313683	0.0268176	0.0159133	0.0169495	0.0126748	0.0118177	0.0129688	0.0148312	0.0151909	0.00949573	0.00993018	0.0100569	0.00832156	0.00783197	0.00849206	0.00861855
TCGA-BH-A203-01Z-00-DX1.FAE40A13-0C4A-415F-9396-01041FF6B855-32-117096x82872-3659x2589.png	2589	305.69	651.862	1549.38	1238.22	1524.25	1214.67	1536.32	1225.96	2.43863	425.3	0.799792	18.6527	0.991706	0.504915	0.466235	29.1483	29.4389	5.82688	2.35596	2.08494	16.282	15.3593	-3.02448	92.6148	0.745468	0.436838	0.0555336	0.130017	0.0636601	0.0337361	0.0226248	0.0223525	0.0310853	0.0267618	0.0162704	0.0172868	0.0123673	0.0118548	0.0132488	0.0147077	0.0154408	0.00979512	0.0101694	0.00999502	0.00809436	0.00817018	0.00877779	0.00890051
TCGA-BH-A204-01Z-00-DX1.9DCE8242-E862-45AB-9452-D7299110973F-32-83776x66708-2618x2084.png	2084	284.841	590.093	1450.32	948.829	1426.84	926.003	1438.07	936.936	2.48329	396.81	0.779661	18.013	0.991982	0.511443	0.46327	27.2409	27.5159	5.6225	2.28457	2.02007	16.148	15.2959	-1.0349	89.7816	0.739767	0.456691	0.0562811	0.131562	0.0636711	0.0333376	0.0234628	0.0213685	0.0304713	0.0270547	0.0163078	0.0173395	0.0133594	0.0117547	0.0129958	0.0148557	0.0157281	0.00982344	0.0103379	0.0104456	0.00858404	0.00822327	0.00887959	0.00899717
TCGA-BH-A208-01Z-00-DX1.C7A2885D-0535-4506-B06E-82BC62D6DFE9-32-99008x94784-3094x2962.png	2962	220.886	495.28	1407.23	1490.38	1385.62	1469.43	1395.91	1479.42	2.76478	324.498	0.806415	15.8545	0.995954	0.477127	0.421751	25.8658	25.6974	4.69173	1.96405	1.70005	14.0505	13.4205	-1.79275	83.4701	0.705877	0.411682	0.0542629	0.116166	0.0631777	0.0341286	0.0229089	0.0231117	0.0301175	0.0274104	0.0174768	0.0174385	0.0127474	0.0125508	0.014151	0.0145352	0.0162026	0.0106195	0.0111489	0.0103266	0.00844078	0.00906162	0.00957397	0.0095005
TCGA-BH-A209-01Z-00-DX1.88B11AEB-11FA-4D23-BC21-378EF177E04B-32-162792x88790-5087x2774.png	2774	339.454	673.486	2432.92	1361.94	2408.42	1337.11	2420.18	1349.02	2.1878	453.416	0.77491	19.6775	0.989365	0.53741	0.499917	28.8879	29.3461	6.3513	2.54644	2.27256	17.3383	16.3854	0.215867	93.191	0.772982	0.479431	0.0572624	0.140796	0.0655027	0.0327986	0.0238772	0.0207354	0.0312333	0.027008	0.0153372	0.0172025	0.0131398	0.0115515	0.0125063	0.0147135	0.015526	0.00926746	0.00987313	0.0101372	0.00852615	0.00778928	0.00851158	0.00856568
TCGA-BH-A28O-01Z-00-DX1.B37603E3-BC80-4DDA-B44D-B5F794E3398E-32-111384x94738-3480x2960.png	2960	300.688	646.482	1646.42	1377.59	1623.82	1351.77	1634.64	1364.17	2.4943	422.898	0.801995	18.4288	0.988755	0.501424	0.459444	29.297	29.4136	5.69948	2.31625	2.04483	16.0708	15.1607	-1.02861	92.2477	0.737466	0.431091	0.0546215	0.127389	0.063367	0.0331629	0.022621	0.0226465	0.0313158	0.0270604	0.0163367	0.017001	0.0124174	0.0119593	0.013441	0.0149774	0.0154715	0.00992755	0.0101649	0.0100695	0.00810548	0.00813274	0.00874264	0.00885044
TCGA-BH-A28Q-01Z-00-DX1.C6D1CA93-6B2A-4722-9270-5D56592D833D-32-132328x90547-4135x2829.png	2829	305.751	621.205	1982.58	1603.66	1957.8	1580.85	1969.7	1591.78	2.18123	410.163	0.788481	18.7338	0.989938	0.530147	0.508289	28.2735	28.6095	6.04411	2.45191	2.18945	16.1657	15.3275	2.65121	88.1728	0.773021	0.465632	0.0562013	0.137857	0.0657316	0.0327564	0.0230382	0.0219459	0.0313825	0.0271809	0.0155031	0.0168448	0.0128691	0.0117641	0.0127775	0.0147048	0.0155912	0.00947932	0.00985296	0.0101193	0.00834158	0.00790675	0.00866543	0.0086232
TCGA-BH-A2L8-01Z-00-DX1.ACA51CA9-3C38-48A6-B4A9-C12FFAB9AB56-32-129472x84239-4046x2632.png	2632	329.917	654.499	1801.72	1438.15	1776.98	1414.07	1788.83	1425.64	2.20337	440.3	0.774792	19.4313	0.990493	0.535422	0.498874	28.6255	29.1096	6.27474	2.52077	2.24282	17.0793	16.1751	-0.41678	91.9701	0.771729	0.475222	0.0574365	0.140072	0.0645388	0.0329854	0.024075	0.0210687	0.0311102	0.0268777	0.0154617	0.0172844	0.0130483	0.0114908	0.012546	0.0147181	0.0155278	0.00939115	0.00988655	0.0101687	0.00850243	0.00767443	0.00853734	0.00850629
TCGA-BH-A42T-01Z-00-DX1.6E4609B9-BE7E-4CA9-A1C0-A77A7DEFBB2B-32-94248x92754-2945x2898.png	2898	233.942	513.834	1754.06	1672.2	1732.46	1650.26	1742.81	1660.72	2.43352	329.864	0.813384	16.3923	0.995062	0.487984	0.466039	26.5449	26.4384	5.04643	2.10786	1.85769	14.1285	13.4126	1.61245	80.7064	0.729547	0.418072	0.055061	0.121555	0.0641848	0.0341781	0.0223272	0.023356	0.03107	0.0276815	0.0170585	0.0172833	0.0127338	0.0124409	0.0140113	0.014903	0.016166	0.010187	0.0104506	0.0101793	0.00829907	0.0085809	0.00921974	0.00933823
TCGA-BH-A42U-01Z-00-DX1.130D060A-3DD8-407E-B8B0-EBBF743491AE-32-106624x92800-3332x2900.png	2900	333.573	689.385	1696.86	1556.93	1672.25	1531.8	1684.09	1543.87	2.37229	458.116	0.782547	19.4164	0.985034	0.518323	0.472835	29.3092	29.6709	6.11444	2.4529	2.17552	17.2204	16.1907	0.831581	95.527	0.752679	0.461345	0.0560816	0.135944	0.0641891	0.0330018	0.0233207	0.0209246	0.0313666	0.026815	0.0158895	0.017189	0.0131405	0.0115607	0.0128433	0.0148781	0.0152684	0.00964595	0.0100569	0.010254	0.0085169	0.00778496	0.00856546	0.0087073
TCGA-BH-A42V-01Z-00-DX1.B6D78256-05D1-45FA-826A-1B8554D60B7D-32-77112x44456-2409x1389.png	1389	267.788	665.948	1075.11	731.687	1050.05	708.143	1062	719.398	2.88847	418.151	0.807919	17.4636	0.992354	0.471422	0.443682	30.0489	29.7104	5.26429	2.15783	1.89351	15.7348	14.9803	-1.39598	92.5696	0.704007	0.405765	0.0542602	0.116305	0.0608007	0.0328939	0.0219885	0.0220218	0.0294155	0.026026	0.0164773	0.0164877	0.0122225	0.0120784	0.0131347	0.014361	0.0152593	0.0100434	0.0101637	0.00991432	0.00794833	0.00825375	0.00890598	0.00883856
TCGA-BH-A5IZ-01Z-00-DX1.6C871030-82E1-463E-A67B-976A5F3DCDB2-32-132328x94685-4135x2958.png	2958	288.15	613.158	2357.65	1659.49	2334.62	1635.17	2345.64	1646.8	2.42408	401.241	0.797641	18.0669	0.989129	0.499704	0.463381	28.4995	28.5973	5.6328	2.29538	2.02595	15.8324	14.9019	1.37086	89.0667	0.736086	0.434783	0.0549609	0.127168	0.0630678	0.0336558	0.0229907	0.0222716	0.0309823	0.0270979	0.0164172	0.0169973	0.01285	0.0120811	0.0133809	0.0149467	0.0156354	0.00983184	0.0102612	0.0101839	0.00829236	0.00818137	0.00874199	0.00903213
TCGA-BH-A5J0-01Z-00-DX1.73CFBC85-8449-48FF-86F8-D4D49A90498B-32-127568x88054-3986x2751.png	2751	280.649	625.99	1749.2	1344.37	1726.64	1319.23	1737.42	1331.29	2.49287	397.05	0.815045	17.8701	0.99219	0.492992	0.46748	29.2216	29.1961	5.53816	2.27126	2.0081	15.2981	14.4631	-7.96784	88.8307	0.738886	0.419194	0.0538047	0.125027	0.0634323	0.0332532	0.0215487	0.0232075	0.0309917	0.0267553	0.0164188	0.0165738	0.0121136	0.0120731	0.0133533	0.0148642	0.0155119	0.00981731	0.0101415	0.00984142	0.00799713	0.00814643	0.00875745	0.00890822
TCGA-C8-A12L-01Z-00-DX1.01863BE4-F4AB-45DE-894A-46544777C519-32-70448x72016-2201x2250.png	2250	303.861	629.471	1180.41	1109.22	1156.89	1085.04	1168.15	1096.65	2.46593	421.347	0.778309	18.6077	0.989268	0.513453	0.459674	27.9103	28.2693	5.82097	2.34618	2.06889	16.7038	15.7737	1.1228	92.8586	0.743557	0.459752	0.0573228	0.133473	0.0638092	0.0336843	0.0238079	0.0211988	0.0309238	0.0266798	0.0160337	0.0174691	0.0133027	0.0115289	0.0129076	0.0147428	0.0153254	0.00966034	0.0103883	0.0103443	0.00871832	0.00801304	0.00880733	0.00875864
TCGA-C8-A12M-01Z-00-DX1.0C5F2DED-873F-4C86-97A2-2AA76A6236DF-32-66073x62511-2064x1953.png	1953	244.85	553.391	1052.66	928.702	1030.25	906.135	1040.94	916.959	2.89944	366.595	0.785961	16.7315	0.994185	0.468531	0.403078	26.5088	26.6113	4.94764	2.03039	1.75106	15.5667	14.6979	1.61896	90.0382	0.688557	0.419942	0.0562467	0.118405	0.0601462	0.034941	0.0240837	0.0220414	0.0294646	0.0260566	0.0170728	0.0180733	0.0134018	0.0121475	0.0135879	0.014512	0.0156347	0.01036	0.0109466	0.0106486	0.00894716	0.00871286	0.00933639	0.00938634
TCGA-C8-A12N-01Z-00-DX1.8E50110E-A6C0-496F-B44E-7190096C113E-32-78064x68245-2439x2132.png	2132	265.391	532.067	1340.54	1069.77	1318.59	1047.67	1329.06	1058.2	2.21081	356.369	0.783286	17.4358	0.99384	0.528853	0.505044	26.0455	26.2251	5.58266	2.29819	2.04664	15.1938	14.5137	4.80619	82.3484	0.76677	0.470582	0.0573991	0.134574	0.0663251	0.0333244	0.0239992	0.0216697	0.030556	0.0280213	0.0159675	0.0174311	0.0131704	0.0118504	0.0128789	0.0144915	0.0161212	0.00969971	0.0103263	0.010298	0.00859564	0.00835714	0.00905557	0.00885134
TCGA-C8-A12O-01Z-00-DX1.A77E552B-7B69-45B7-B341-A03571F2A06C-32-65115x52822-2034x1650.png	1650	170.279	402.088	897.645	794.79	878.259	775.314	887.449	784.566	3.01769	263.028	0.809018	14.0909	0.997329	0.452353	0.388571	23.8472	23.4293	3.99496	1.72498	1.4449	12.7689	12.3024	-4.15109	77.2222	0.671385	0.390118	0.0525764	0.105143	0.0611349	0.0337423	0.0237671	0.0232444	0.0285771	0.0278895	0.0183	0.0176675	0.0133352	0.0130382	0.0148858	0.0149921	0.0165602	0.0109861	0.0114171	0.0105965	0.00892024	0.00957883	0.0103585	0.0101226
TCGA-C8-A12P-01Z-00-DX1.670B5DE8-07B0-4E4C-93FA-FA3DFFCCE50D-32-53312x58924-1666x1841.png	1841	219.044	459.47	751.321	919.721	729.821	899.689	740.095	909.214	2.49555	305.437	0.806945	15.7925	0.998353	0.502691	0.467678	25.5191	25.3329	4.8165	2.04049	1.79134	13.5265	13.0123	-0.329269	78.6114	0.733608	0.426632	0.0563244	0.119931	0.065392	0.0346868	0.0236616	0.0234096	0.0302892	0.0286122	0.0168047	0.0172502	0.0131219	0.0123085	0.0138994	0.0149285	0.016485	0.0102622	0.0107678	0.0103213	0.00860997	0.00901621	0.00949985	0.00940217
TCGA-C8-A12Q-01Z-00-DX1.CE74E5B7-FD30-4CBE-8716-ECCF2213AAC3-32-76160x62955-2380x1967.png	1967	217.322	475.006	1161.52	924.315	1140.74	903.324	1150.64	913.305	2.6413	313.158	0.792197	15.8179	0.99816	0.485514	0.437909	24.8619	24.8277	4.77415	1.99638	1.74172	14.2234	13.5759	0.00135772	81.0849	0.713566	0.431074	0.0557313	0.120857	0.0636818	0.0342931	0.0241879	0.0221909	0.0300168	0.0275949	0.0172304	0.0180024	0.0137129	0.012426	0.0137796	0.0147866	0.0162422	0.0105251	0.0109423	0.0106892	0.00903187	0.00892254	0.00950864	0.00946805
TCGA-C8-A12U-01Z-00-DX1.8E90FC9F-630E-4611-A5D2-D6F11DBE81EF-32-90440x88610-2826x2769.png	2769	249.247	543.067	1295.28	1445.78	1273.02	1423.48	1283.63	1434.12	2.75483	361.121	0.786378	16.8817	0.994027	0.485692	0.423934	26.3649	26.48	5.0849	2.08562	1.8154	15.3489	14.5614	-0.890387	88.4496	0.710263	0.431764	0.0557711	0.123087	0.0618318	0.0341158	0.0238726	0.0220594	0.0298198	0.0268795	0.0168565	0.0176829	0.0133665	0.0122254	0.0136719	0.014777	0.015831	0.0103085	0.0108131	0.0103955	0.00884808	0.00862373	0.00929725	0.00933589
TCGA-C8-A12V-01Z-00-DX1.84B29360-B87B-4648-A697-B6610336C2BB-32-81394x75937-2543x2373.png	2373	293.36	616.942	1394.43	1269.92	1370.86	1246.16	1382.16	1257.54	2.60845	411.53	0.785347	18.2353	0.992691	0.506611	0.44773	27.9703	28.3327	5.63179	2.27925	2.00485	16.2876	15.4181	0.695411	93.1319	0.734773	0.445061	0.0560286	0.130081	0.0626061	0.0333682	0.0231571	0.0216806	0.0303462	0.0267247	0.0161264	0.0170503	0.0129423	0.0120671	0.0131594	0.014748	0.0154307	0.0098889	0.0102718	0.0103358	0.00845228	0.00827931	0.00908179	0.00905706
TCGA-C8-A12W-01Z-00-DX1.3727E7BB-831E-42DB-B5CB-F2D7C649290F-32-81872x79990-2558x2499.png	2499	203.876	456.761	1211.01	1363.53	1190.98	1342.65	1200.49	1352.59	2.67753	298.496	0.797362	15.3238	0.995517	0.481905	0.438592	24.576	24.4768	4.60038	1.93593	1.68256	13.6687	13.0688	1.27829	79.5194	0.711732	0.423753	0.0562529	0.117631	0.0631685	0.0345901	0.023822	0.0228854	0.0298754	0.0279288	0.0171831	0.0173862	0.0132402	0.0124206	0.0140633	0.0145977	0.0164928	0.0107769	0.0108608	0.0103306	0.00883254	0.00925315	0.00963044	0.0095824
TCGA-C8-A12X-01Z-00-DX1.2967579D-40AE-4425-BE81-5109713C16B4-32-72969x57596-2280x1799.png	1799	199.345	435.02	1103.8	955.349	1083.06	935.956	1092.92	945.142	2.26147	278.101	0.811956	15.2562	0.999055	0.506362	0.514039	24.7177	24.3534	4.7748	2.04187	1.81417	12.8658	12.4398	1.21722	72.5936	0.75448	0.437231	0.0586327	0.116693	0.0681939	0.0351444	0.0231377	0.0235523	0.0299028	0.0288788	0.0173531	0.0170121	0.0129194	0.0130394	0.013933	0.0146248	0.0165599	0.0101863	0.0106616	0.0100803	0.00835356	0.00933148	0.00952585	0.0094017
TCGA-C8-A12Y-01Z-00-DX1.A15CB3E2-E145-4C75-8FEA-1DD503CD7C20-32-90440x59207-2826x1850.png	1850	209.641	476.325	1502.8	967.668	1481.83	946.632	1491.79	956.642	2.79341	310.118	0.801253	15.5808	0.996076	0.470287	0.416632	25.2068	25.1785	4.61107	1.93055	1.66999	13.9868	13.3208	-2.26111	82.449	0.699848	0.41103	0.0548026	0.11724	0.0617915	0.0347409	0.0235323	0.0231839	0.0297675	0.0273256	0.0172032	0.0175958	0.0130027	0.0124168	0.0140789	0.0146544	0.016302	0.0106708	0.0108214	0.0104427	0.00860099	0.00903252	0.00977285	0.00966286
TCGA-C8-A12Z-01Z-00-DX1.22616420-7C80-42DE-9C44-0F00327681C6-32-75208x65593-2350x2049.png	2049	301.548	628.29	1207.45	946.336	1183.51	922.634	1195.01	933.995	2.42434	415.279	0.784074	18.5245	0.989197	0.512951	0.468326	28.0854	28.427	5.82125	2.35134	2.08028	16.3875	15.5005	3.52185	91.6276	0.748785	0.455408	0.0565524	0.133139	0.0638201	0.0335908	0.0234065	0.0215328	0.0308537	0.0268596	0.0159451	0.0171747	0.0130828	0.0119323	0.0130781	0.0146405	0.0153782	0.00968191	0.0102529	0.0102506	0.00850033	0.00815707	0.00883894	0.00885006
TCGA-C8-A130-01Z-00-DX1.F6810204-C35A-4461-A18A-0A117739B988-32-70448x60290-2201x1884.png	1884	307.282	629.234	1256.84	1034.7	1232.66	1011.33	1244.24	1022.48	2.35375	423.591	0.778444	18.6755	0.990913	0.52207	0.481192	27.8903	28.2296	5.90685	2.38556	2.11911	16.6846	15.7559	1.46782	91.4294	0.75296	0.466264	0.057461	0.13489	0.0646834	0.0334222	0.0240259	0.0212501	0.0306618	0.0270035	0.0159051	0.0174405	0.0132782	0.0116301	0.0128021	0.0147194	0.0154879	0.00960985	0.0101809	0.0102631	0.00874946	0.00797632	0.00884169	0.00878874
TCGA-C8-A131-01Z-00-DX1.5CB27A29-9951-40B9-B4DB-26A4D2EA89B8-32-54264x76913-1695x2403.png	2403	321.333	656.443	957.171	1134.88	932.912	1110.55	944.554	1122.19	2.39546	441.183	0.773336	19.069	0.988193	0.518476	0.470801	28.2992	28.7579	6.05542	2.42429	2.14156	17.1181	16.1419	-1.86895	93.9051	0.749622	0.46662	0.0571822	0.136037	0.0636556	0.0332211	0.0239024	0.0208484	0.030607	0.0266247	0.015884	0.0174083	0.0132207	0.0116446	0.0126372	0.014614	0.0152803	0.00956814	0.0102641	0.0102537	0.00874296	0.00807699	0.00872334	0.00880174
TCGA-C8-A132-01Z-00-DX1.6CCE1FE0-BB4B-4046-BAF0-43AA110B2EBE-32-64736x58946-2023x1842.png	1842	306.346	613.035	1087.35	729.89	1063.71	706.376	1075.02	717.597	2.16752	409.428	0.776669	18.7292	0.989919	0.532952	0.507179	27.6259	28.0263	6.07356	2.45827	2.18788	16.4131	15.5865	0.256744	87.9283	0.771119	0.476567	0.0574329	0.138945	0.0655057	0.0328303	0.0240907	0.0209671	0.0310606	0.0267973	0.0157412	0.0173498	0.0130183	0.011366	0.0126822	0.01444	0.0156404	0.00961649	0.0100637	0.0101155	0.00849993	0.00758457	0.00865441	0.00858185
TCGA-C8-A134-01Z-00-DX1.78D10BCC-98B3-4587-897D-3E27DA28D2EB-32-69496x71847-2171x2245.png	2245	376.547	752.764	1115.11	1022.48	1089.38	996.285	1101.75	1008.87	2.24349	504.65	0.769156	20.6707	0.988439	0.534659	0.49005	30.2299	30.7643	6.65487	2.63717	2.34494	18.3809	17.2953	-1.14459	99.2827	0.770899	0.481811	0.0574624	0.141116	0.0644462	0.0331024	0.0243008	0.0203249	0.0310464	0.026687	0.0153323	0.0174888	0.013042	0.0115198	0.0123945	0.014867	0.0152761	0.00927716	0.0100352	0.0101576	0.00840082	0.00738008	0.0084093	0.00842735
TCGA-C8-A135-01Z-00-DX1.B69A605E-B577-4F43-9471-2C95312B05D9-32-70448x94153-2201x2942.png	2942	307.403	625.882	1178	1648.2	1154.63	1623.97	1165.83	1635.58	2.35212	419.869	0.776941	18.6984	0.990383	0.525777	0.479226	28.0044	28.3571	5.91409	2.38916	2.12202	16.5433	15.6552	0.680788	91.3804	0.75722	0.466141	0.0563708	0.136039	0.0640497	0.0326404	0.0239524	0.0212192	0.0308483	0.0269305	0.0154959	0.0171407	0.0132681	0.0119256	0.0129715	0.0147772	0.0155835	0.0095662	0.0101861	0.0101968	0.00858098	0.00820212	0.00872005	0.00881994
TCGA-C8-A137-01Z-00-DX1.87F3775D-A401-4D5E-843F-8FB1D4BE97F8-32-74256x77812-2320x2431.png	2431	308.117	635.826	1082.54	1168.25	1059.13	1143.67	1070.31	1155.45	2.39585	422.275	0.781795	18.7436	0.988492	0.51429	0.471689	28.1126	28.5199	5.91437	2.38371	2.10753	16.6593	15.7446	-5.17104	92.1488	0.751192	0.459746	0.0575462	0.134588	0.0636335	0.0338581	0.0236631	0.0214065	0.0307817	0.0268297	0.0159519	0.0175265	0.0129363	0.0116374	0.0129483	0.0148821	0.0154149	0.00950034	0.0102298	0.0102097	0.00871871	0.00807348	0.00865994	0.0086119
TCGA-C8-A138-01Z-00-DX1.845A0680-23A4-4A58-A9C4-2EE17BDBD371-32-71400x62110-2231x1940.png	1940	307.043	624.757	1164.86	926.496	1140.38	903.43	1152.12	914.479	2.32376	419.553	0.776923	18.7193	0.991654	0.524292	0.485211	27.8593	28.2208	5.94338	2.40245	2.13464	16.6505	15.7616	-1.39697	90.8512	0.757573	0.468595	0.0574105	0.135892	0.0644773	0.0333478	0.0241025	0.0210087	0.0310113	0.0268961	0.0159803	0.0173472	0.0133424	0.0118298	0.0128362	0.0146443	0.0155214	0.00965508	0.0101466	0.0103533	0.00863373	0.00798579	0.00875347	0.0086063
TCGA-C8-A1HE-01Z-00-DX1.83A5D816-E3A6-46B8-B1B8-B31486EB686E-32-74256x67903-2320x2121.png	2121	228.124	514.776	1167.21	974.879	1146.12	952.479	1156.18	963.204	2.74006	333.687	0.804536	16.1695	0.995886	0.475175	0.428701	26.2417	26.2425	4.82451	2.00934	1.74842	14.3082	13.6129	-1.77436	84.65	0.709588	0.411499	0.0539361	0.118455	0.062065	0.0343457	0.022575	0.0237037	0.0303109	0.0272472	0.0172591	0.017258	0.012696	0.0126292	0.0139957	0.0147997	0.0160275	0.0105179	0.0106973	0.0104575	0.00845682	0.00884139	0.00947782	0.00960758
TCGA-C8-A1HF-01Z-00-DX1.81EF9A57-54E1-4750-9816-5571FD18A297-32-83776x89577-2618x2799.png	2799	251.877	567.403	1357.61	1333.39	1335.33	1310.26	1346.02	1321.34	2.932	372.732	0.792204	16.9209	0.995132	0.471896	0.403224	26.9793	27.0886	4.99747	2.04642	1.76628	15.4758	14.6299	-0.0441077	91.4696	0.696229	0.416623	0.0541069	0.120137	0.0609164	0.0338346	0.0230634	0.0225593	0.0300934	0.0265493	0.0168807	0.0174632	0.0130815	0.0121851	0.013803	0.0147038	0.0157464	0.0104299	0.0108319	0.0105056	0.00854979	0.00861251	0.00933211	0.00940517
TCGA-C8-A1HG-01Z-00-DX1.F2AB6D0F-4D6B-491F-915B-92E838E79D67-32-92344x88617-2885x2769.png	2769	266.517	559.572	1449.55	1400.55	1427.29	1377.72	1437.94	1388.62	2.55043	373.891	0.780299	17.4039	0.992378	0.501644	0.450084	26.5125	26.7447	5.37954	2.19592	1.92812	15.6652	14.8638	0.0599552	87.8173	0.730565	0.448451	0.0561509	0.128655	0.0628391	0.0335048	0.0243283	0.0216287	0.0303684	0.0269403	0.0163266	0.0175165	0.0135652	0.0120176	0.0134184	0.014805	0.0157765	0.00996199	0.0104771	0.0104765	0.00884218	0.00829107	0.0090363	0.00917821
TCGA-C8-A1HI-01Z-00-DX1.C6D0F8B8-55ED-477F-BAF7-AA05D0449CC8-32-89488x66802-2796x2087.png	2087	249.427	537.093	1470.19	936.619	1448.24	914.373	1458.75	924.984	2.56046	353.145	0.795311	16.8723	0.99547	0.496513	0.451827	26.386	26.4581	5.19681	2.13813	1.87353	14.9327	14.2015	0.864864	85.5061	0.730095	0.437302	0.0567185	0.124659	0.0641196	0.0342444	0.0232669	0.0224314	0.0306599	0.0271155	0.0167187	0.0171452	0.0132681	0.0121033	0.013653	0.0145417	0.0158605	0.0102469	0.0104542	0.0103487	0.00880939	0.00862851	0.00920189	0.00926833
TCGA-C8-A1HJ-01Z-00-DX1.745159F1-85E7-4CC0-B088-E1CA91916FB8-32-79016x65278-2469x2039.png	2039	326.4	664.264	1177.74	1009.86	1153.2	985.523	1164.95	997.186	2.38808	446.152	0.775424	19.2293	0.990681	0.521074	0.470893	28.5462	28.9341	6.09219	2.44051	2.16092	17.2032	16.2156	-1.12058	94.5824	0.753225	0.468515	0.0574142	0.136368	0.0642658	0.033302	0.0239539	0.0206369	0.0309162	0.0269469	0.0155747	0.0173006	0.0131392	0.0115901	0.0126945	0.0147012	0.0152408	0.0094985	0.0102097	0.0102802	0.00870507	0.00800351	0.00856396	0.00876384
TCGA-C8-A1HK-01Z-00-DX1.A15F452B-1260-4106-86D1-05F00082F0CE-32-90440x73084-2826x2283.png	2283	229.985	488.681	1551.33	1084.29	1529.88	1063.26	1540.1	1073.29	2.50329	324.01	0.792162	16.2774	0.997011	0.49806	0.457502	25.2923	25.3558	5.03588	2.0875	1.82804	14.4404	13.769	0.0226299	81.422	0.73128	0.440048	0.0572675	0.124238	0.0639216	0.034629	0.0240246	0.0223954	0.0298973	0.0276611	0.0166311	0.0174884	0.0134969	0.0123282	0.0138866	0.014583	0.0162024	0.0100832	0.0105137	0.0103512	0.00881011	0.00887826	0.00936202	0.0094341
TCGA-C8-A1HL-01Z-00-DX1.CC21CAE9-DE48-4ADE-A959-5A99010AAFAC-32-76160x64441-2380x2013.png	2013	203.381	414.343	1323.85	1054.76	1304.21	1035.43	1313.55	1044.59	2.06617	272.692	0.797637	15.3886	0.997407	0.540596	0.557748	23.7554	23.3942	4.98238	2.12339	1.91132	12.8865	12.5259	-0.897066	70.3163	0.785033	0.475508	0.0589596	0.125562	0.071927	0.0334335	0.0240292	0.0227393	0.0303135	0.0293514	0.0166349	0.0167431	0.0130984	0.0127663	0.0134003	0.0144486	0.0164581	0.0100203	0.0102598	0.00990966	0.00864686	0.00914248	0.00964425	0.00923354
TCGA-C8-A1HM-01Z-00-DX1.F93C3F56-3AA6-4D38-B51E-4694CBEA3830-32-71400x55667-2231x1739.png	1739	335.787	668.587	970.602	937.265	945.399	913.393	957.507	924.805	2.23811	451.272	0.767924	19.5551	0.988121	0.533276	0.494055	28.5074	28.986	6.29651	2.5234	2.24474	17.4335	16.4622	0.716509	93.4466	0.767394	0.483053	0.0573997	0.139793	0.0645983	0.0327904	0.0245798	0.0209289	0.0306933	0.0268389	0.0154079	0.0172354	0.013615	0.0115764	0.0126335	0.0144549	0.0154267	0.00937429	0.00987742	0.0103374	0.00862815	0.00766735	0.00858396	0.00862041
TCGA-C8-A1HN-01Z-00-DX1.7EBBEAB1-EBB7-456F-8848-AFE2263242B7-32-55216x74440-1725x2326.png	2326	308.737	621.379	757.382	1186.53	734.362	1161.99	745.367	1173.76	2.2635	416.97	0.779135	18.7897	0.989336	0.52754	0.488731	27.9396	28.3547	5.99248	2.42214	2.15644	16.5382	15.6514	0.303313	90.1816	0.762575	0.467552	0.0566113	0.137868	0.0647717	0.0329177	0.0237472	0.021269	0.0312265	0.0271755	0.0155814	0.0172545	0.013168	0.0115837	0.0128252	0.0148039	0.0156595	0.00959761	0.0100707	0.0100983	0.00843457	0.00782531	0.00864084	0.00873466
TCGA-C8-A1HO-01Z-00-DX1.0C702CEE-C373-4D00-A706-32206D41AC17-32-62832x69677-1963x2177.png	2177	263.183	554.846	947.71	999.083	925.238	976.474	936.005	987.27	2.55602	369.513	0.787453	17.335	0.994672	0.498181	0.447858	26.5517	26.8758	5.38296	2.1946	1.92294	15.5092	14.7054	2.75756	87.5665	0.729088	0.44077	0.0569115	0.128383	0.0626667	0.0343123	0.0232924	0.0222733	0.0299863	0.0270098	0.0164945	0.0173178	0.0129683	0.0119093	0.0134394	0.0149256	0.0155608	0.0100748	0.0104566	0.0103893	0.0085351	0.00820824	0.00904085	0.00914735
TCGA-C8-A26V-01Z-00-DX1.6E86DF74-D575-4969-8142-963D9DF5208F-32-75208x56013-2350x1750.png	1750	346.26	695.949	1071.46	766.716	1046.51	741.626	1058.49	753.646	2.34405	468.797	0.771554	19.7878	0.990862	0.526466	0.475922	29.0935	29.6788	6.32134	2.52067	2.23307	17.706	16.7066	1.57849	96.5117	0.75856	0.470758	0.0575847	0.138418	0.0633785	0.0331911	0.0242406	0.0208288	0.0308361	0.0265884	0.0156313	0.0176029	0.0131617	0.0114413	0.0126219	0.0147379	0.0151259	0.009461	0.0101469	0.0103034	0.0086583	0.0077028	0.00848277	0.008586
TCGA-C8-A26W-01Z-00-DX1.CFF07941-6CD1-4CF9-BE5F-387DA67B66CC-32-93296x80527-2915x2516.png	2516	270.472	577.965	1416.48	1340.15	1393.47	1317.21	1404.46	1328.2	2.67652	385.449	0.786783	17.5647	0.99304	0.498204	0.434832	27.2058	27.4602	5.34381	2.17883	1.90976	15.7747	14.9574	-2.22895	90.861	0.7235	0.437332	0.0555863	0.127003	0.0622185	0.033663	0.0233441	0.0219418	0.0305168	0.0266472	0.0163401	0.0172636	0.0132119	0.011936	0.0135339	0.0147476	0.0155833	0.00995604	0.0105441	0.0104053	0.00864313	0.00844773	0.00901775	0.00917261
TCGA-C8-A26X-01Z-00-DX1.FBD86F91-BAD7-4484-8D50-202340FBF242-32-50456x60051-1576x1876.png	1876	344.58	713.885	712.808	1002.92	689.197	975.702	700.461	988.796	2.37065	471.965	0.790433	19.8233	0.988306	0.520629	0.471347	30.1999	30.6718	6.23821	2.49315	2.21634	17.3042	16.3041	3.33851	97.7655	0.75863	0.45241	0.0566674	0.136166	0.0637373	0.0343186	0.0227939	0.0222608	0.0320018	0.0265756	0.015779	0.016894	0.0125504	0.0113509	0.012806	0.0147929	0.0151863	0.00962785	0.0102947	0.00991694	0.00828886	0.00770845	0.00850103	0.00839971
TCGA-C8-A26Z-01Z-00-DX1.1A15D951-F3BD-4024-91DD-E7633C09A837-32-80437x72115-2513x2253.png	2253	259.092	538.784	1357.42	1103.17	1335.25	1081	1345.85	1091.59	2.41278	358.275	0.79302	17.1936	0.992642	0.513438	0.473733	26.5259	26.5555	5.34996	2.20464	1.95149	15.0433	14.3701	-0.686898	84.7944	0.748047	0.44919	0.056596	0.127546	0.0656181	0.03384	0.023868	0.0220289	0.0307847	0.0277793	0.0164248	0.017334	0.0132473	0.0122846	0.0135634	0.0147388	0.0160274	0.0100634	0.0103828	0.0102581	0.00851816	0.00850155	0.00922826	0.00906671
TCGA-C8-A273-01Z-00-DX1.6E5D581F-DF80-478D-82D1-6D6525EED1B5-32-74256x63607-2320x1987.png	1987	228.635	521.842	1171.4	831.397	1149.63	809.782	1160.04	820.088	2.87303	340.373	0.794765	16.198	0.995822	0.478858	0.417788	26.064	25.8535	4.76968	1.98287	1.72719	14.708	14.0128	0.488225	86.7566	0.702071	0.425211	0.05582	0.116641	0.0635344	0.0341183	0.0238612	0.021361	0.029722	0.0273631	0.0169038	0.017626	0.0135579	0.0121431	0.0139096	0.0146854	0.0159503	0.0106117	0.0108405	0.0104553	0.00891371	0.00896335	0.00966781	0.00935291
TCGA-C8-A274-01Z-00-DX1.B667DAB1-C944-4285-A312-5E4DDAE0EE78-32-96152x67984-3004x2124.png	2124	232.175	531.955	1606.15	962.778	1584.2	940.464	1594.69	951.114	3.10145	351.235	0.792123	16.305	0.995942	0.461046	0.382243	26.336	26.4153	4.71574	1.94219	1.66005	15.0486	14.2905	1.9458	90.5837	0.679483	0.406411	0.0541595	0.115401	0.0593492	0.0345022	0.0230846	0.022707	0.0289394	0.0260263	0.0172877	0.0175986	0.0131528	0.0124608	0.0138246	0.0146663	0.015835	0.0105073	0.010825	0.0105224	0.00862198	0.00894058	0.0095895	0.00955239
TCGA-C8-A275-01Z-00-DX1.44D27E67-4DD6-4893-B38A-01E48F5A358A-32-83776x70579-2618x2205.png	2205	304.034	621.71	1239	1084.75	1214.98	1061.3	1226.5	1072.51	2.42081	418.82	0.772955	18.6338	0.991227	0.517845	0.466122	27.6149	28.0215	5.87562	2.36675	2.09114	16.801	15.8593	-0.862021	92.1005	0.74766	0.466752	0.0575285	0.135291	0.0633304	0.0336522	0.0244629	0.0207522	0.0305668	0.0268509	0.0158138	0.0176729	0.0133176	0.0117382	0.0128688	0.0145191	0.015408	0.00966876	0.010178	0.0104306	0.00874549	0.00817379	0.00862791	0.00883641
TCGA-C8-A278-01Z-00-DX1.188B3FE0-7B20-401A-A6B7-8F1798018162-32-65688x61262-2052x1914.png	1914	308.886	640.095	1054.66	869.345	1030.9	844.95	1042.29	856.652	2.43722	427.147	0.780903	18.7736	0.992699	0.514757	0.465956	28.2593	28.6785	5.90601	2.37736	2.10473	16.7396	15.8091	-1.60984	93.2387	0.747841	0.457551	0.0572166	0.134769	0.0634616	0.0337198	0.0237389	0.0211472	0.0307305	0.0267485	0.0158888	0.0174467	0.0132338	0.0116073	0.0128799	0.014751	0.0154346	0.00965931	0.0102895	0.010419	0.00850731	0.00802442	0.00871197	0.00870824
TCGA-C8-A27A-01Z-00-DX1.0E26C46D-CD65-40F3-8976-EB4415582934-32-67592x77623-2112x2425.png	2425	301.676	614.121	977.069	1189.63	953.063	1166.65	964.544	1177.64	2.40818	416.597	0.770896	18.4926	0.990632	0.522989	0.470378	27.3927	27.7374	5.83011	2.35182	2.08625	16.661	15.7632	0.802898	91.4632	0.748912	0.470326	0.0573602	0.134535	0.0643456	0.0328968	0.0244701	0.0204115	0.0305183	0.0269717	0.015847	0.017377	0.0137187	0.0118283	0.0128847	0.0146263	0.0155645	0.00954716	0.0103054	0.0105014	0.00879915	0.00806525	0.00888266	0.00889054
TCGA-C8-A27B-01Z-00-DX1.5A8A14E8-6430-4147-9C71-805024E098CB-32-76160x60807-2380x1900.png	1900	341.287	693.995	1105.89	881.075	1080.39	856.658	1092.62	868.371	2.43764	468.164	0.768098	19.6467	0.989798	0.521724	0.463353	28.9394	29.5553	6.23519	2.47888	2.18837	17.714	16.6854	-1.51305	97.746	0.750337	0.468265	0.0571509	0.138078	0.0623302	0.0331902	0.0237974	0.0208064	0.0302778	0.0261183	0.0155922	0.0172268	0.0131638	0.0118515	0.0126332	0.0148693	0.0152654	0.00947723	0.0100826	0.0102783	0.00860567	0.00793135	0.00862446	0.00879253
TCGA-C8-A3M7-01Z-00-DX1.846C75F1-2E7E-44F7-B21F-C246141558FA-32-92344x81017-2885x2531.png	2531	262.822	586.264	1394.15	1427.31	1371.56	1403.83	1382.36	1415.06	2.86937	384.765	0.794796	17.2261	0.991882	0.476273	0.408786	27.4106	27.6225	5.12391	2.09074	1.81243	15.5893	14.738	-6.14791	92.2359	0.702223	0.416516	0.0547895	0.121622	0.0608828	0.0341082	0.0229406	0.0226529	0.0304573	0.0263317	0.0168548	0.0174723	0.0127944	0.0120605	0.0138381	0.0147874	0.0156925	0.010298	0.0107184	0.0105229	0.00850109	0.00867655	0.0091844	0.00939434
TCGA-C8-A3M8-01Z-00-DX1.97AC85E0-6281-4F2E-8034-24AD5F52D5A6-32-62832x86855-1963x2714.png	2714	306.273	642.194	787.186	1578.02	763.813	1553.08	775.002	1565.05	2.34562	422.538	0.793163	18.665	0.990113	0.514259	0.479652	28.8974	29.1353	5.88961	2.38506	2.12061	16.3016	15.3717	-2.56136	91.0565	0.752189	0.447007	0.0559195	0.131709	0.0641298	0.0338737	0.0231411	0.0220392	0.0310352	0.0270524	0.0160607	0.0171312	0.0128028	0.0118406	0.0131111	0.0148189	0.0154752	0.00976694	0.0101073	0.0100599	0.0083411	0.00787987	0.00883988	0.00875244
TCGA-C8-A8HP-01Z-00-DX1.B6EE8271-2E51-4184-9B0C-2ADA69B4A714-32-71712x44905-2241x1403.png	1403	321.995	653.394	1163.68	759.668	1139.46	735.554	1151.03	747.089	2.33757	438.993	0.770582	19.0644	0.990894	0.524322	0.484801	28.0833	28.5797	6.09857	2.44657	2.16648	17.0757	16.1647	0.98386	92.8944	0.757937	0.472001	0.0570086	0.137798	0.0637849	0.0328527	0.0242592	0.020979	0.0306498	0.0270469	0.0155999	0.0173546	0.0132605	0.0119737	0.0126555	0.0146159	0.0155566	0.00963766	0.0101048	0.0102154	0.0086143	0.007984	0.00870863	0.00877247
TCGA-C8-A8HQ-01Z-00-DX1.A08190B5-F17E-4057-9DBD-B2F34CAEAFDC-32-87648x64713-2739x2022.png	2022	297.015	617.501	1498.84	1000.3	1475.28	976.518	1486.53	987.947	2.47833	413.872	0.779972	18.4072	0.993167	0.513344	0.462315	27.8615	28.1609	5.74861	2.32213	2.04996	16.4796	15.5617	0.830819	91.9943	0.741949	0.45576	0.0561373	0.132542	0.0633663	0.033671	0.0238352	0.0212473	0.0308743	0.0266747	0.0161047	0.0172736	0.0133539	0.0119127	0.01276	0.0146708	0.0155032	0.00978234	0.0102663	0.0103673	0.00852089	0.00818804	0.00880771	0.00893808
TCGA-C8-A8HR-01Z-00-DX1.8E841CA8-1CE2-4242-AC5A-3247075CF8F4-32-45816x54501-1431x1703.png	1703	251.119	554.209	634.733	833.474	613.316	810.047	623.468	821.163	2.82586	367.164	0.794062	16.868	0.992026	0.481459	0.41494	26.7558	26.858	5.0306	2.0644	1.78632	15.2877	14.4529	-0.027294	89.7753	0.705257	0.421764	0.0543545	0.122071	0.0615587	0.0338949	0.0231874	0.0222696	0.0300509	0.0272895	0.0166979	0.017516	0.0129783	0.0124618	0.0136044	0.0148982	0.0158207	0.0104052	0.0108767	0.0103921	0.00864574	0.00875177	0.00933728	0.00937125
TCGA-D8-A1J8-01Z-00-DX1.EADAB43A-87C6-47FA-9120-25B69E23366D-32-96151x76785-3004x2399.png	2399	270.905	575.044	1399.13	1240.08	1376.89	1216.57	1387.52	1227.82	2.55475	381.831	0.790443	17.5788	0.993371	0.501687	0.45213	27.199	27.3072	5.40591	2.20878	1.94774	15.6914	14.8684	1.25056	88.9121	0.732465	0.443227	0.0564201	0.126823	0.0639099	0.0342485	0.0234852	0.0215004	0.030593	0.0271399	0.0165445	0.0172793	0.0130428	0.0120059	0.0133633	0.014711	0.015706	0.0100722	0.0104682	0.0102517	0.00865814	0.00846811	0.00899253	0.00911354
TCGA-D8-A1J9-01Z-00-DX1.F81FA9EF-8129-4E17-A9AD-2B850782CC18-32-121855x96009-3807x3000.png	3000	217.056	497.343	1708.37	1357.36	1686.47	1336.41	1696.93	1346.4	2.86812	322.078	0.810961	15.772	0.995513	0.472961	0.413721	26.2559	26.0443	4.60986	1.93914	1.67356	13.9038	13.2819	-0.640024	84.1611	0.699104	0.40166	0.0529103	0.114091	0.0620071	0.0331782	0.0223769	0.023427	0.0301329	0.0270753	0.0169376	0.017113	0.0126318	0.0127777	0.0142356	0.014782	0.0159692	0.0105219	0.0107326	0.0104035	0.00843481	0.00911224	0.00949413	0.00963848
TCGA-D8-A1JA-01Z-00-DX1.BD43F94A-D5A8-490E-AED4-5F3AB24080FA-32-98055x93170-3064x2911.png	2911	215.865	505.063	1527.93	1508.41	1505.96	1487.39	1516.45	1497.41	3.00307	328.132	0.795658	15.7735	0.99687	0.461727	0.396492	25.7346	25.6523	4.5736	1.90486	1.63224	14.474	13.7452	3.03962	86.6031	0.685053	0.408408	0.0548397	0.114289	0.0605387	0.0341909	0.0232082	0.0227772	0.0294226	0.02658	0.017378	0.0174303	0.0132006	0.0126954	0.0140657	0.0147212	0.0158636	0.0105772	0.0110894	0.0106958	0.00888674	0.0091602	0.00956112	0.00958565
TCGA-D8-A1JB-01Z-00-DX1.6CF48257-066C-4B8C-91AA-30A6B4AD4307-32-117095x78961-3659x2467.png	2467	244.988	530.44	1655.27	991.596	1632.71	970.17	1643.51	980.383	2.6876	352.003	0.788324	16.6832	0.997735	0.486497	0.432687	26.0654	26.1459	5.07123	2.08569	1.81432	15.0559	14.3045	-0.662874	86.4511	0.713627	0.433569	0.0558773	0.122801	0.0626714	0.0340119	0.0236208	0.0223774	0.0298672	0.0271661	0.0168575	0.0170449	0.0132104	0.0122674	0.0137713	0.0147281	0.0158785	0.0104118	0.0104887	0.0103031	0.00874999	0.00868323	0.0093303	0.00926972
TCGA-D8-A1JC-01Z-00-DX1.16D32FE8-4D76-4EEC-9739-D394087605BC-32-105671x87453-3302x2732.png	2732	255.263	605.428	1672.48	1516.26	1648.39	1493.23	1659.92	1504.25	2.70815	370.264	0.829934	17.007	0.99666	0.464922	0.431148	29.4485	29.3192	5.06296	2.09639	1.83697	14.312	13.5179	-16.284	88.7378	0.713678	0.384099	0.0505742	0.116105	0.0608125	0.0332479	0.0206197	0.0241072	0.0309596	0.0267111	0.0168883	0.0167757	0.0115015	0.0127009	0.014174	0.0151348	0.0154403	0.0101109	0.0104858	0.00971151	0.00779101	0.00865071	0.00915235	0.00934643
TCGA-D8-A1JD-01Z-00-DX1.6D215B14-DD90-4635-8645-AF06EBD9BA3F-32-110431x81568-3450x2549.png	2549	225.666	498.197	1836.87	1282.46	1815.61	1261.01	1825.73	1271.24	2.66073	325.606	0.806439	16.0049	0.992226	0.480612	0.4342	25.904	25.7641	4.80204	2.0067	1.74235	14.0937	13.451	-1.4834	82.5161	0.714922	0.415754	0.055398	0.117339	0.0630119	0.0344481	0.0229996	0.0231476	0.02995	0.0275648	0.0170287	0.0175137	0.0129957	0.0125067	0.0140266	0.0146296	0.0162463	0.0104571	0.0108002	0.0104594	0.00850359	0.00883098	0.00949549	0.00941457
TCGA-D8-A1JE-01Z-00-DX1.714805A1-E337-46DA-88D9-6CE4B4E3C2D0-32-178975x75170-5592x2349.png	2349	215.86	491.594	2693.94	1076.34	2673.51	1054.06	2683.21	1064.69	2.74287	315.612	0.815253	15.7977	0.996277	0.473535	0.426556	26.1862	25.9627	4.67261	1.96083	1.70897	13.7793	13.1646	-2.24336	82.7701	0.71001	0.404562	0.0534963	0.115367	0.0631083	0.0340333	0.0225138	0.0232686	0.0305163	0.0276279	0.017269	0.017257	0.0125855	0.0124725	0.0140439	0.0148737	0.0163664	0.0106337	0.0108097	0.0101918	0.00832719	0.00891234	0.00941156	0.00950348
TCGA-D8-A1JF-01Z-00-DX1.224EDA43-F822-4A88-814A-BA7D4C60F8CC-32-172311x91538-5384x2860.png	2860	222.745	497.716	2378.78	1354.37	2357.18	1332.98	2367.47	1343.17	2.77974	324.791	0.809647	15.9675	0.995669	0.47834	0.421048	26.2326	26.0971	4.71068	1.9798	1.71435	14.0608	13.4255	-1.39196	83.6994	0.704721	0.403303	0.0528578	0.116496	0.0621379	0.0333135	0.022479	0.0236974	0.0306845	0.0272363	0.0171092	0.0171646	0.0128398	0.0126896	0.014009	0.0149179	0.016142	0.0103901	0.0108074	0.0103951	0.00836428	0.00894696	0.00947278	0.00955777
TCGA-D8-A1JG-01Z-00-DX1.BA6D5CC7-3A9B-4D17-A86A-B159D345A216-32-95199x95950-2974x2998.png	2998	254.751	547.989	1446.11	1397.94	1425.15	1374.03	1435.14	1385.48	2.55369	359.673	0.803012	17.0538	0.995418	0.499096	0.452128	27.1326	27.1849	5.24571	2.15799	1.89406	14.8376	14.1225	0.337273	86.2548	0.731902	0.427998	0.0560098	0.124201	0.0636261	0.0341695	0.0226831	0.0228538	0.0304641	0.0269349	0.0166697	0.0170487	0.0128965	0.01222	0.0135277	0.0146377	0.0157907	0.0101567	0.0104657	0.0102284	0.00848089	0.00860508	0.00913565	0.00916313
TCGA-D8-A1JH-01Z-00-DX1.4A4F2502-612C-421D-9F64-444BF2C85620-32-123759x86840-3867x2713.png	2713	221.696	474.612	2330.29	1307.01	2309.39	1285.69	2319.33	1295.84	2.50038	310.402	0.813044	16.0097	0.997052	0.500239	0.458168	26.04	25.8362	4.85315	2.04734	1.80161	13.5791	13.0162	4.17969	79.9086	0.735289	0.420209	0.0539059	0.120993	0.0650062	0.0332634	0.0225474	0.0242475	0.0314278	0.0280798	0.0165073	0.0170768	0.0126445	0.0125982	0.0140586	0.0149283	0.0163148	0.0100171	0.0104975	0.0101408	0.00834437	0.00897825	0.00931231	0.00936703
TCGA-D8-A1JI-01Z-00-DX1.9BDB647F-EEAB-4235-BE44-A3815A48CCE0-32-92343x89063-2885x2783.png	2783	247.122	561.242	1305.27	1425.28	1282.58	1402.78	1293.46	1413.56	2.57776	353.286	0.815039	16.7871	0.993262	0.482639	0.448461	27.681	27.6152	5.08793	2.11126	1.8548	14.3811	13.6701	1.95363	85.3138	0.725702	0.411328	0.0537386	0.120412	0.0628789	0.033906	0.0220749	0.0233863	0.030813	0.0269461	0.0169456	0.0170616	0.012629	0.0123566	0.0136773	0.0148506	0.0160053	0.0102304	0.0105313	0.0101585	0.00813079	0.00871655	0.0091681	0.00932219
TCGA-D8-A1JJ-01Z-00-DX1.a986b48f-b295-4d7a-b778-ce829cdf9c38-32-84727x89863-2647x2808.png	2808	210.157	468.267	1416.78	1355.91	1396.02	1335.07	1405.91	1344.97	2.70007	307.191	0.799635	15.5423	0.996766	0.477049	0.428568	25.1178	25.0194	4.64951	1.95099	1.68604	13.8443	13.2339	1.34207	80.6485	0.704892	0.414274	0.0539473	0.116989	0.0622201	0.0337482	0.0234743	0.0233901	0.0303172	0.0276092	0.0175145	0.017656	0.0130614	0.0124287	0.0142316	0.0147174	0.0164698	0.0106071	0.0111025	0.0103354	0.00859771	0.00905542	0.00956929	0.00956573
TCGA-D8-A1JL-01Z-00-DX1.FE3F0C6B-F98A-4036-BF9A-25A8CC66B1FD-32-155175x96085-4849x3002.png	3002	237.288	540.098	2422.79	1488.01	2400.16	1466.07	2410.95	1476.53	3.01517	356.844	0.792959	16.4681	0.997479	0.465076	0.389484	26.514	26.5906	4.79171	1.97433	1.69318	15.158	14.3147	0.510374	90.5222	0.684521	0.40962	0.0545932	0.117018	0.0598292	0.0343352	0.0234209	0.0227309	0.0296667	0.0263231	0.0170386	0.0176699	0.0131586	0.0124139	0.0140005	0.0147806	0.015539	0.0105648	0.0109266	0.0105268	0.00868205	0.00878136	0.00940902	0.0094617
TCGA-D8-A1JM-01Z-00-DX1.3CD15BC8-08B3-4BEE-9FD7-A8BEED33268E-32-77111x79199-2409x2474.png	2474	365.461	733.565	1200.91	1301.36	1174.93	1276.02	1187.45	1288.2	2.35564	493.729	0.768012	20.3396	0.986243	0.527252	0.471782	29.773	30.378	6.49841	2.57479	2.27951	18.2072	17.1492	2.90814	99.5998	0.760034	0.474986	0.0570693	0.140471	0.0631439	0.0332395	0.024106	0.0205068	0.0309971	0.0263357	0.0153826	0.0172858	0.0130766	0.0111853	0.0123862	0.0146994	0.0151803	0.00939035	0.0100623	0.0102251	0.00864799	0.00771012	0.00839907	0.00857861
TCGA-D8-A13Y-01Z-00-DX1.02321E77-A11E-41A5-95FE-BB897EA5CE58-32-76159x87551-2379x2735.png	2735	246.232	526.527	1117.45	1241.38	1095.6	1219.5	1106.03	1229.95	2.56951	348.581	0.788677	16.7675	0.993832	0.500357	0.452729	26.0419	26.1082	5.12165	2.1167	1.86237	14.9169	14.2347	-3.30296	85.3037	0.732129	0.442321	0.0564978	0.125672	0.0634666	0.0339044	0.0238405	0.0220461	0.0302619	0.027473	0.0166124	0.0174121	0.013209	0.0119917	0.013653	0.0147637	0.0161931	0.0100492	0.0105089	0.0102425	0.00868232	0.00872705	0.00931411	0.00931938
TCGA-D8-A13Z-01Z-00-DX1.517140BB-D34C-42F8-952C-340EF16D382F-32-96151x82354-3004x2573.png	2573	247.539	540.681	1579.68	1457.93	1557.72	1435.45	1568.18	1446.23	2.60588	353.406	0.800795	16.8043	0.994676	0.49033	0.440756	26.7493	26.7535	5.12309	2.11136	1.84535	14.8001	14.0731	0.0772026	85.87	0.72334	0.426967	0.0560837	0.122207	0.0632784	0.0344197	0.0228776	0.0231101	0.0302755	0.0272184	0.0168949	0.0171482	0.0128806	0.0121494	0.0136522	0.0145956	0.016036	0.0103758	0.0106445	0.0103756	0.00846455	0.00862577	0.00927004	0.00928924
TCGA-D8-A140-01Z-00-DX1.5B9382C0-332C-4FBF-82CD-B9453D02B815-32-81871x61354-2558x1917.png	1917	280.107	593.604	1141.89	856.136	1118.75	832.873	1129.8	844.027	2.47998	390.019	0.793795	17.8325	0.991799	0.505195	0.460281	27.6184	27.8533	5.55104	2.2598	1.99654	15.7059	14.828	1.68998	89.1127	0.741459	0.443845	0.0551314	0.129592	0.0642252	0.0333201	0.0222836	0.0221286	0.0306948	0.0268449	0.0160177	0.0168375	0.0128965	0.0121006	0.0131876	0.0144025	0.0156853	0.00967766	0.0101865	0.0103858	0.00865214	0.0083019	0.00904117	0.00918839
TCGA-D8-A141-01Z-00-DX1.10F6EEB2-C920-43FF-B5A7-B5A651CBDBE3-32-74255x71330-2320x2229.png	2229	263.726	563.163	1205.88	1307.84	1183.16	1285.46	1194.02	1296.14	2.49773	372.33	0.780567	17.3186	0.994288	0.501299	0.461004	26.656	26.8215	5.37879	2.19965	1.93937	15.4931	14.6839	-1.03202	86.962	0.733633	0.449222	0.0568485	0.127611	0.0628814	0.0338862	0.0245081	0.0216714	0.0298144	0.0273668	0.0165689	0.0175314	0.0135591	0.0120277	0.0135207	0.0147406	0.0159184	0.0100305	0.0103758	0.010444	0.00874581	0.00845647	0.00897465	0.00907526
TCGA-D8-A142-01Z-00-DX1.F6D58989-9120-40C9-918D-6B1650C1A8E8-32-106623x73532-3331x2297.png	2297	277.963	593.072	1480.58	1350.71	1457.81	1327.15	1468.7	1338.46	2.55934	391.138	0.789361	17.7233	0.9928	0.498622	0.446508	27.5287	27.7366	5.46106	2.2248	1.95589	15.7645	14.909	-2.34938	89.8826	0.730383	0.439357	0.0553219	0.128059	0.0627429	0.0332407	0.0232362	0.0222664	0.030528	0.0271055	0.0161937	0.0171635	0.0130816	0.0119328	0.0133168	0.0149574	0.0157252	0.00989321	0.0104727	0.0104052	0.00868741	0.00828745	0.00897206	0.00911063
TCGA-D8-A143-01Z-00-DX1.4697FB2F-91D5-4506-AF23-7DE304D44A3F-32-115191x66180-3599x2068.png	2068	297.084	624.812	1487.96	1131.66	1464.31	1107.65	1475.64	1119.15	2.46772	411.009	0.794323	18.3579	0.993574	0.507441	0.461212	28.4673	28.7182	5.7161	2.31759	2.04385	16.0538	15.1922	0.222546	91.5837	0.744682	0.440897	0.0561297	0.129818	0.0634684	0.0340829	0.0231646	0.0223228	0.03091	0.0267433	0.0164023	0.0172258	0.0127321	0.011989	0.013241	0.0146488	0.0155654	0.00970375	0.0102531	0.0101314	0.00832704	0.00802769	0.00884605	0.00887951
TCGA-D8-A145-01Z-00-DX1.34D4EC27-7FD7-4BE2-95A4-CA521CB5590E-32-99959x80069-3123x2502.png	2502	313.198	641.106	1586.38	1330.85	1563.45	1305.7	1574.4	1317.78	2.27519	426.979	0.782611	18.8727	0.987624	0.52484	0.489758	28.3908	28.7152	5.9794	2.42127	2.16415	16.6118	15.6923	-6.5213	91.0015	0.760335	0.465214	0.0566142	0.135965	0.0650111	0.0331207	0.0242003	0.0212504	0.0311224	0.0270741	0.0157684	0.0173919	0.0133857	0.0116157	0.0128445	0.0148112	0.0156182	0.00940653	0.0101111	0.0102059	0.00854704	0.00799089	0.00866819	0.00878194
TCGA-D8-A146-01Z-00-DX1.D93FB315-E5D7-49BA-8380-38B16B70361B-32-68543x62306-2141x1947.png	1947	219.637	485.322	905.549	868.532	884.169	847.531	894.347	857.543	2.57127	315.429	0.806936	15.8994	0.996723	0.488039	0.450821	25.8686	25.7616	4.83196	2.0217	1.76722	13.8093	13.2111	0.726549	80.6435	0.722553	0.417716	0.0561189	0.117893	0.0633619	0.0343626	0.022361	0.0237024	0.0298987	0.027857	0.0173469	0.0169054	0.012784	0.0125497	0.014099	0.014658	0.0164939	0.0104535	0.0106108	0.0101739	0.00832828	0.00910899	0.00931214	0.00945384
TCGA-D8-A147-01Z-00-DX1.159094F2-BB78-4910-B7AE-3D7CAAB1DAD9-32-99007x72205-3093x2256.png	2256	314.878	627.407	1685.67	1111.28	1662.76	1086.45	1673.72	1098.38	2.15932	420.494	0.776222	19.0042	0.988944	0.53682	0.51046	28.0446	28.3852	6.15244	2.48548	2.22262	16.6646	15.7943	0.592161	89.2014	0.774692	0.479791	0.0576802	0.139194	0.0658587	0.0328691	0.0241049	0.020707	0.0311316	0.0273502	0.0155387	0.0171835	0.0131745	0.011481	0.0125994	0.014677	0.0155201	0.00949675	0.00995419	0.0100805	0.00855567	0.00792254	0.00862256	0.00858568
TCGA-D8-A1JN-01Z-00-DX1.3B02989C-CEA0-4EDD-A6DC-21C3A957C640-32-91391x88569-2855x2767.png	2767	263.598	569.066	1517.67	1324.79	1494.53	1302.37	1505.61	1313.07	2.75298	379.033	0.782515	17.2971	0.99058	0.490676	0.42456	26.936	27.201	5.22127	2.13329	1.85486	15.6772	14.8858	-1.86152	90.4761	0.713081	0.432472	0.0551679	0.124499	0.060968	0.0334802	0.0238167	0.0223345	0.0299137	0.0266572	0.0166146	0.0174408	0.0133116	0.0120774	0.0135269	0.0148408	0.0156091	0.010267	0.0105108	0.010496	0.00868048	0.0087007	0.00918726	0.00932094
TCGA-D8-A1JP-01Z-00-DX1.B02959C4-6AAD-4ACA-9838-61D224D838E4-32-88535x67757-2766x2117.png	2117	216.283	473.624	1390.19	958.788	1369.15	938.027	1379.17	947.887	2.47867	305.074	0.812867	15.8091	0.997037	0.493864	0.464356	25.5665	25.3273	4.83103	2.03455	1.7925	13.5022	12.9616	-0.0515966	78.7924	0.735384	0.426639	0.0549933	0.12038	0.0663107	0.0338958	0.0229167	0.023326	0.030988	0.0282544	0.0169392	0.0173001	0.0126463	0.0125696	0.0138602	0.014769	0.0166503	0.0103406	0.0106291	0.0100933	0.00826047	0.00913697	0.00931463	0.00922207
TCGA-D8-A1JS-01Z-00-DX1.76C592B0-DC6D-401A-9533-C9FE5B6CA08D-32-124711x93230-3897x2913.png	2913	272.591	570.411	1574.81	1432.49	1552.2	1409.5	1563.01	1420.49	2.40009	374.836	0.795022	17.566	0.994135	0.51295	0.475665	27.5222	27.5574	5.49297	2.25483	1.99162	15.1714	14.4817	-2.37187	86.2893	0.749908	0.444459	0.0559877	0.127858	0.0645561	0.0333559	0.0232769	0.0222543	0.0306985	0.0273024	0.0162403	0.0171095	0.0130305	0.0123638	0.013386	0.0147821	0.0157851	0.00998897	0.0101325	0.010281	0.0084242	0.00845897	0.00894404	0.00910837
TCGA-D8-A1JT-01Z-00-DX1.F278C419-E405-4BDA-BA50-BFBA08801168-32-168503x58437-5265x1826.png	1826	268.117	562.769	2700.94	901.642	2678.15	879.038	2689.04	889.842	2.53358	374.905	0.784172	17.5514	0.995353	0.506157	0.457902	26.8145	27.008	5.46698	2.22716	1.95952	15.6585	14.8846	1.07701	88.2745	0.737595	0.450602	0.057812	0.128753	0.0639116	0.0340545	0.023818	0.0217189	0.030123	0.0271086	0.0163161	0.0174326	0.0131542	0.0119613	0.0132844	0.0143644	0.0156781	0.00993334	0.0104451	0.0102678	0.00862399	0.00828033	0.00901132	0.00903064
TCGA-D8-A1JU-01Z-00-DX1.355D93B4-E69E-417C-B3D1-3E1AAF1E02FE-32-62831x86047-1963x2688.png	2688	265.546	559.793	872.715	1284.1	849.355	1262.13	860.494	1272.59	2.45087	367.32	0.796902	17.429	0.992527	0.504519	0.462368	27.1474	27.3242	5.40874	2.22173	1.96199	15.1512	14.4047	3.72992	86.2914	0.74298	0.438704	0.0559643	0.128302	0.0639376	0.0337202	0.0230939	0.0223228	0.0309772	0.0270668	0.016442	0.0172101	0.0129517	0.0119613	0.0135052	0.0148642	0.0158135	0.0100488	0.0104056	0.0101199	0.00855183	0.00846859	0.00891223	0.00911309
TCGA-D8-A1X5-01Z-00-DX1.81B10B43-0D99-44D0-A245-D652041B8FEE-32-65688x72039-2052x2251.png	2251	194.98	450.251	1064.51	1094.43	1044.34	1073.6	1053.95	1083.51	3.00849	296.885	0.79691	15.0512	0.998244	0.458623	0.391511	24.6036	24.4667	4.33212	1.83304	1.55613	13.8097	13.22	0.112415	82.2434	0.675529	0.402688	0.0541952	0.111707	0.0605146	0.0341773	0.0231826	0.0225603	0.0290122	0.0271228	0.0174121	0.017472	0.0132496	0.0127988	0.0143139	0.0146576	0.01628	0.0108656	0.0114509	0.0105429	0.00891189	0.00934051	0.00970043	0.00989105
TCGA-D8-A1X6-01Z-00-DX1.ABF237D4-708C-46A5-AEF8-58712E5DCC04-32-93296x68484-2915x2140.png	2140	207.974	480.924	1504.56	1191.43	1483.62	1170.22	1493.61	1180.34	2.79872	306.99	0.816948	15.511	0.997705	0.468724	0.420985	25.9127	25.6139	4.54541	1.92076	1.66453	13.5829	12.9667	-3.59401	81.9291	0.704164	0.401331	0.0538974	0.113497	0.0630306	0.0339904	0.0221341	0.0234249	0.030207	0.0275055	0.017427	0.0171574	0.0127805	0.012583	0.0141838	0.0147519	0.0163133	0.0106755	0.0108446	0.0104546	0.00836107	0.00913028	0.00960282	0.00944376
TCGA-D8-A1X7-01Z-00-DX1.3529AEED-2827-4D94-9A8B-32F116EE49D5-32-60928x75183-1904x2349.png	2349	202.476	463.471	1037.09	1302.5	1016.41	1281.95	1026.25	1291.69	2.4331	292.479	0.812949	15.3169	0.995896	0.496267	0.489274	25.6605	25.2408	4.74153	2.01028	1.76572	12.9858	12.4958	-2.36532	75.5802	0.735648	0.426789	0.056736	0.112532	0.0657549	0.0337137	0.0226312	0.0235131	0.029377	0.0280155	0.0169884	0.0169678	0.0125356	0.0130451	0.0139074	0.014594	0.0159675	0.0104382	0.0107521	0.0100714	0.0081771	0.00936628	0.00954482	0.00935559
TCGA-D8-A1X8-01Z-00-DX1.DDA3866E-C7CC-4650-BE2B-5C9A98A2D531-32-101864x78486-3183x2452.png	2452	283.151	597.128	1345.1	1425.01	1321.73	1402.01	1332.91	1413.02	2.41958	392.954	0.788251	17.9135	0.992889	0.514066	0.478119	27.6517	27.8412	5.62395	2.29145	2.02567	15.6656	14.8802	5.59556	88.6757	0.750935	0.454189	0.0563045	0.129726	0.0642377	0.0332588	0.02324	0.0221944	0.0305407	0.0268866	0.0159417	0.016881	0.0129749	0.0119867	0.0131012	0.0146493	0.0156449	0.00966934	0.0102517	0.0100408	0.00856987	0.00834755	0.00903435	0.00898375
TCGA-D8-A1X9-01Z-00-DX1.28CE7849-EEC5-4ABB-A319-A977A1FD3CD1-32-74256x74312-2320x2322.png	2322	246.487	543.307	1057.3	1190.39	1034.68	1168.4	1045.49	1178.88	2.65728	352.419	0.804558	16.7995	0.994197	0.486868	0.43858	27.0146	26.9643	5.08572	2.09856	1.8368	14.7481	13.9956	2.12891	86.408	0.720917	0.421934	0.0546804	0.121228	0.0634324	0.0338698	0.0225379	0.022889	0.0307323	0.0272867	0.0166911	0.0170154	0.0130626	0.0122886	0.013741	0.0147146	0.0158313	0.0102369	0.0106477	0.0102183	0.00835777	0.0087595	0.00922343	0.00924515
TCGA-D8-A1XA-01Z-00-DX1.36A807F0-2D35-4CE3-8A27-CC59181B1A3D-32-69496x67911-2171x2122.png	2122	234.842	491.457	1171.22	1124.65	1151.45	1102.19	1160.86	1112.96	2.27513	321.295	0.789472	16.3224	0.996779	0.522217	0.516078	25.5565	25.5179	5.22001	2.17229	1.92579	13.9126	13.3531	4.01743	78.124	0.759695	0.463277	0.0551727	0.122854	0.0645659	0.0325474	0.0221519	0.0233778	0.0302802	0.0270896	0.0161305	0.0164329	0.0127936	0.0127085	0.0136718	0.0150092	0.0160449	0.0099363	0.0104034	0.0101143	0.0084332	0.00927189	0.00949694	0.00962803
TCGA-D8-A1XB-01Z-00-DX1.DA8E2FA4-DBBA-4157-8052-B90FB3BB58F1-32-93296x94802-2915x2962.png	2962	261.258	541.407	1457.64	1450.77	1435.93	1427.84	1446.29	1438.78	2.35776	358.036	0.796724	17.3076	0.99494	0.51208	0.480378	26.7823	26.8862	5.42576	2.23752	1.98458	14.9848	14.2718	1.90271	84.1393	0.75111	0.445575	0.0557047	0.129435	0.0651461	0.0334757	0.0231797	0.0230805	0.0311415	0.0275631	0.0161766	0.0171576	0.0128165	0.0122426	0.0134424	0.0146994	0.0158888	0.00985857	0.0101971	0.010135	0.00843732	0.00834799	0.00902826	0.00896385
TCGA-D8-A1XC-01Z-00-DX1.E7494388-838B-4D35-9CA1-77017CBE77F2-32-114240x58536-3570x1829.png	1829	261.573	537.526	1631.36	994.723	1609.34	972.385	1619.83	983.07	2.20422	349.24	0.788222	17.368	0.99635	0.52736	0.516546	26.6385	26.6756	5.5929	2.31069	2.05944	14.7969	14.2326	-0.66584	81.5385	0.773721	0.465496	0.0579687	0.130874	0.0660692	0.0328278	0.0238508	0.0217952	0.030247	0.0276007	0.0161527	0.0167776	0.0128813	0.0122259	0.0131177	0.0142017	0.015722	0.00975245	0.00996415	0.00982499	0.00831101	0.00844661	0.00896578	0.00880834
TCGA-D8-A1XD-01Z-00-DX1.E500D561-1F49-4F08-99AE-E8345F21B406-32-108528x82573-3391x2580.png	2580	257.089	561.258	1447.26	1219.44	1425.32	1196.29	1435.77	1207.37	2.52062	364.763	0.800592	17.1342	0.992899	0.497466	0.460395	27.2331	27.1604	5.2708	2.16949	1.9139	15.0035	14.2403	-1.38288	86.4444	0.735977	0.436064	0.0569386	0.123397	0.0645541	0.0345517	0.0230111	0.0230423	0.0305796	0.027372	0.0168891	0.0170479	0.0128129	0.0123778	0.0134732	0.0145741	0.0160138	0.0101334	0.0106221	0.0101608	0.00838968	0.00860215	0.00905481	0.00900397
TCGA-D8-A1XF-01Z-00-DX1.8B9AB4A1-DEC5-4587-B022-3077CCD220F9-32-78064x79562-2439x2486.png	2486	286.973	607.618	1214.43	1345.18	1190.66	1322.14	1202.06	1333.17	2.4809	401.64	0.780174	18.0626	0.991783	0.50559	0.458733	27.5582	27.8759	5.63487	2.28299	2.01692	16.1512	15.2673	0.567525	90.4542	0.738224	0.45124	0.0566413	0.131021	0.0623321	0.033829	0.0238529	0.0213973	0.0301953	0.0268644	0.0159972	0.0173811	0.0133244	0.0117214	0.013014	0.0148407	0.0156049	0.00978172	0.0103763	0.0104984	0.00855221	0.00816619	0.00884136	0.00898751
TCGA-D8-A1XG-01Z-00-DX1.0A58EF43-B97E-4111-8DC3-2F8D9BDBE7D6-32-86632x69822-2707x2181.png	2181	234.438	498.591	1476.65	1105.86	1455.74	1084.01	1465.69	1094.41	2.40988	326.215	0.799865	16.4322	0.995148	0.509332	0.482139	26.0039	25.7239	5.09094	2.12536	1.88815	14.1621	13.5701	-3.86776	80.7391	0.747529	0.44527	0.0565379	0.122695	0.0666763	0.0338854	0.0238229	0.0222322	0.0308604	0.0282719	0.0169728	0.0170742	0.0130212	0.012433	0.0138142	0.014401	0.0161157	0.0101609	0.0105275	0.0100474	0.00844223	0.00873123	0.00922051	0.00904302
TCGA-D8-A1XJ-01Z-00-DX1.660DDF8D-6816-4EBE-AF37-6F7A374F4E9E-32-72352x80897-2261x2528.png	2528	270.513	570.862	941.924	1349.06	918.589	1326.8	929.767	1337.44	2.36791	372.956	0.793428	17.5779	0.992572	0.5094	0.483279	27.2546	27.4214	5.53705	2.27127	2.0077	15.267	14.5512	-0.54738	85.7748	0.750856	0.446462	0.0572646	0.128202	0.0644007	0.0341427	0.0230903	0.0225795	0.0305824	0.0268883	0.0165013	0.0171819	0.0128538	0.0123023	0.0131297	0.0144004	0.0156424	0.0099594	0.0104662	0.0102215	0.00836744	0.0084413	0.00897015	0.00881602
TCGA-D8-A1XK-01Z-00-DX1.41EB1BBC-F230-4E3F-8C4E-CE331CAF1935-32-87584x72452-2737x2264.png	2264	318.165	657.384	1388.33	1201.72	1363.71	1177.77	1375.52	1189.27	2.5171	442	0.77145	18.9516	0.993419	0.511584	0.455338	28.1589	28.6822	5.96942	2.38627	2.09358	17.1744	16.2088	0.662622	95.3437	0.739782	0.46212	0.0575478	0.134318	0.0624639	0.0337851	0.0238942	0.0211415	0.030087	0.0262463	0.0159854	0.0173666	0.0132921	0.0115743	0.0127404	0.0146058	0.0153456	0.00973405	0.0102385	0.0104326	0.00864874	0.00795776	0.00884346	0.0088148
TCGA-D8-A1XL-01Z-00-DX1.FDF07020-8F40-4C00-9023-E5F40E0D8A7C-32-70448x72681-2201x2271.png	2271	293.514	611.754	1436.91	1063.39	1413.84	1039.4	1424.93	1050.91	2.48886	404.907	0.786618	18.2215	0.990861	0.506096	0.457497	27.8025	28.0861	5.69165	2.30698	2.02635	16.1383	15.3106	-0.536534	90.8583	0.741726	0.449372	0.0569308	0.130107	0.0633554	0.0337622	0.0232842	0.0212618	0.0304013	0.0264325	0.0159541	0.0172436	0.0131744	0.0118977	0.0130346	0.0146611	0.0155536	0.00990905	0.0103329	0.0100915	0.00866146	0.00830353	0.009022	0.00894262
TCGA-D8-A1XM-01Z-00-DX1.5F6A140E-5D20-45F6-B76F-0F98AB27AD08-32-91392x89051-2856x2782.png	2782	302.65	640.585	1374.31	1727.22	1349.18	1704.13	1361.23	1715.19	2.29952	410.176	0.808055	18.522	0.99161	0.515316	0.494462	29.3491	29.5326	5.86248	2.3892	2.12093	15.5746	14.7668	3.52467	89.3081	0.763446	0.439076	0.0537332	0.130087	0.0648378	0.0325648	0.0213873	0.0236034	0.0316591	0.0272276	0.0158998	0.016334	0.0117733	0.0117869	0.0133061	0.0151676	0.0156306	0.00975666	0.009958	0.00974721	0.00780641	0.00815505	0.00867871	0.00890684
TCGA-D8-A1XO-01Z-00-DX1.A9EF6AFF-62B0-4E2D-ABC7-DC06FF473890-32-108528x86359-3391x2698.png	2698	240.129	517.178	1925.6	947.749	1904.43	925.292	1914.53	936.007	2.44815	335.791	0.805165	16.5989	0.995742	0.496819	0.463816	26.3925	26.3887	5.12346	2.12846	1.87925	14.3796	13.6734	1.07264	82.1422	0.735269	0.429768	0.0553272	0.124485	0.0645437	0.0339631	0.0228771	0.0229884	0.0309307	0.0275875	0.0166513	0.017085	0.0127575	0.0120973	0.0136105	0.014947	0.0160317	0.01004	0.0104578	0.0101065	0.00848845	0.00853761	0.00910918	0.00928229
TCGA-D8-A1XQ-01Z-00-DX1.1A17A5C7-F14B-4AD2-AD5F-D3400D86A366-32-89488x85605-2796x2675.png	2675	316.653	623.62	1652.78	1022	1629.64	997.638	1640.7	1009.29	2.17876	422.057	0.775564	18.9826	0.991316	0.53825	0.504883	27.8275	28.2101	6.16681	2.48627	2.21279	16.7065	15.8377	-1.50637	89.3523	0.771706	0.479429	0.0579355	0.139366	0.0654619	0.0330905	0.0239525	0.0210249	0.0308804	0.0269728	0.0153062	0.0171306	0.0132656	0.0116137	0.0126776	0.0144981	0.0156365	0.00946393	0.00987698	0.0101417	0.00870961	0.00792348	0.00859244	0.00857464
TCGA-D8-A1XR-01Z-00-DX1.7F443346-C564-47B6-9736-6944230CAF46-32-184688x94468-5771x2952.png	2952	257.551	536.274	2962.51	1429.04	2940.28	1407.22	2950.93	1417.63	2.29745	353.132	0.78955	17.1399	0.99429	0.516909	0.493079	26.2241	26.3265	5.41926	2.23732	1.99029	14.9716	14.2751	1.65145	82.4384	0.754017	0.458043	0.0572375	0.129588	0.0658148	0.0336905	0.0237653	0.0218302	0.0307139	0.027815	0.0162168	0.0170923	0.0133382	0.0121034	0.0133778	0.0147683	0.016037	0.00981889	0.010344	0.0102956	0.00861453	0.00855349	0.00910375	0.00916275
TCGA-D8-A1XT-01Z-00-DX1.9E4DEEEB-AB0A-45F6-A69B-65B3E6F22D46-32-152320x88335-4760x2760.png	2760	268.129	562.241	2539.86	1292.56	2517.49	1269.83	2528.16	1280.68	2.50878	375.651	0.777784	17.4636	0.993356	0.508999	0.464416	26.5174	26.7299	5.43723	2.22133	1.95671	15.683	14.893	-0.63047	87.6281	0.737717	0.457151	0.0569405	0.128804	0.0632957	0.0335215	0.023782	0.0213651	0.0300733	0.0269118	0.0163837	0.0172992	0.0133359	0.0122414	0.0131709	0.0148093	0.0157162	0.00981312	0.0104451	0.0103371	0.00880594	0.00843268	0.00906357	0.00925338
TCGA-D8-A1XU-01Z-00-DX1.769DBC38-6F0D-425B-A904-79EBA1C119EF-32-90440x71290-2826x2227.png	2227	220.533	495.464	1598.74	1142.78	1577.08	1121.63	1587.42	1131.73	2.65269	318.226	0.808101	15.9164	0.996259	0.481484	0.443438	26.1348	26.0279	4.7928	2.00796	1.74966	13.82	13.1566	-0.436188	81.8124	0.716876	0.41376	0.053255	0.117027	0.0624497	0.0333154	0.0224136	0.024154	0.0302293	0.0272746	0.0167352	0.0169989	0.0124487	0.012726	0.0139669	0.0149567	0.0159523	0.0103719	0.0108569	0.0102068	0.00828056	0.00895227	0.00934882	0.00963158
TCGA-D8-A1XV-01Z-00-DX1.D0D78B02-2A0D-4107-8083-D2FE1D3F1207-32-90440x71948-2826x2248.png	2248	303.369	636.645	1692.33	1225.83	1668.95	1201.35	1680.15	1213.1	2.28785	412.972	0.795239	18.546	0.991738	0.517125	0.495206	28.6526	28.8576	5.90171	2.39613	2.12587	16.001	15.1785	1.28779	89.2065	0.761515	0.452636	0.0559459	0.131805	0.0651182	0.0332772	0.0228131	0.0223978	0.0309921	0.0272349	0.0158492	0.0169683	0.0127	0.011947	0.0130955	0.0147575	0.0156116	0.00972318	0.0101392	0.00995743	0.00823416	0.00820854	0.0088185	0.00886826
TCGA-D8-A1XW-01Z-00-DX1.10187A1F-086B-4CD9-AC01-ADA2E435CD34-32-85680x79038-2677x2469.png	2469	319.318	641.699	1394.33	1461.97	1370.72	1437.47	1382.03	1449.21	2.28223	432.139	0.770302	19.0695	0.990644	0.528808	0.489557	28.0531	28.4447	6.10286	2.45764	2.18658	17.0205	16.0904	-1.39288	91.7434	0.76162	0.47809	0.0578589	0.137512	0.0644652	0.0330085	0.0242209	0.0204939	0.0305449	0.0271489	0.0156433	0.0171177	0.0132616	0.011544	0.0125673	0.014708	0.0155301	0.00952575	0.0100778	0.0102151	0.00866206	0.0079835	0.00875309	0.00868044
TCGA-D8-A1XY-01Z-00-DX1.AC051FB4-1D51-449B-BF2D-9DDB4382414C-32-177072x46299-5533x1446.png	1446	216.341	465.674	2687.46	782.447	2666.97	761.406	2676.72	771.457	2.51256	307.928	0.786545	15.8442	0.995148	0.498265	0.464272	24.7749	24.7906	4.91852	2.04812	1.78914	14.0841	13.4785	-2.19036	79.2767	0.72777	0.441997	0.0567156	0.122056	0.0631451	0.0342371	0.0240425	0.0224527	0.029494	0.0275426	0.0168648	0.0175409	0.013407	0.0123515	0.0136831	0.0147891	0.0162395	0.0101698	0.0108175	0.0105053	0.00893105	0.00898409	0.00941999	0.00944
TCGA-D8-A1XZ-01Z-00-DX1.8E51A61D-B01C-4A52-8F5D-44D2ABCA46FC-32-187544x66002-5860x2062.png	2062	286.717	591.958	2756.37	1055.1	2733.87	1031.29	2744.63	1042.72	2.18213	386.539	0.794701	18.1295	0.993403	0.528517	0.51248	27.8482	27.9677	5.79789	2.37721	2.13583	15.5466	14.7618	6.19565	85.3823	0.770611	0.460242	0.056334	0.133985	0.0667936	0.0331794	0.0231506	0.0214629	0.031609	0.0276971	0.0159525	0.0169811	0.0126921	0.011921	0.0129348	0.0146239	0.0158525	0.00951653	0.0099923	0.00984476	0.00822495	0.00799949	0.00882032	0.00861632
TCGA-D8-A1Y0-01Z-00-DX1.10F40197-4174-43CC-AAD3-8CB85154FB2D-32-102816x69271-3213x2164.png	2164	300.234	645.624	1531.62	762.829	1507.69	738.597	1519.19	750.186	2.3901	413.843	0.792913	18.4571	0.992956	0.50911	0.475906	28.9376	29.1542	5.78113	2.35103	2.08695	15.9766	15.1052	3.10563	90.616	0.750394	0.444483	0.0547235	0.131007	0.0629857	0.0326042	0.0227174	0.0220909	0.0305399	0.0268564	0.0158841	0.0171083	0.0125331	0.0119731	0.0130478	0.0148684	0.0155452	0.00966024	0.0101091	0.0100081	0.00812893	0.00811785	0.00875318	0.00880602
TCGA-D8-A1Y1-01Z-00-DX1.477390C8-2141-4ADD-813E-25220D2A71FC-32-141848x85744-4432x2679.png	2679	334.289	665.775	2137.14	1395.3	2112.97	1370.52	2124.56	1382.39	2.25838	450.165	0.771646	19.497	0.989542	0.534869	0.489371	28.604	29.0437	6.25792	2.50447	2.22931	17.311	16.3457	2.05686	93.7084	0.766893	0.479608	0.0568543	0.139973	0.0649621	0.0326575	0.0239973	0.020637	0.0309888	0.02708	0.0153826	0.0172172	0.0133679	0.0114018	0.0125162	0.0146915	0.0154503	0.00937477	0.00998157	0.0102522	0.00870813	0.00779492	0.00854392	0.00866954
TCGA-D8-A1Y2-01Z-00-DX1.77451A0F-00FD-44A9-A0D0-CB7A39CE74CC-32-93296x80329-2915x2510.png	2510	295.072	607.586	1407.57	1134.2	1384.97	1109.67	1395.77	1121.43	2.33431	402.136	0.794277	18.3229	0.989773	0.516113	0.480149	28.1794	28.4788	5.79095	2.35317	2.09107	15.8886	15.0606	-1.43311	88.8908	0.75461	0.446356	0.055864	0.132445	0.0641332	0.033692	0.0229716	0.0225304	0.0312571	0.0273039	0.0161533	0.0169236	0.0128481	0.011794	0.0131731	0.0149727	0.0156616	0.00973321	0.0101621	0.0101983	0.00831421	0.00814945	0.00867217	0.00882337
TCGA-D8-A1Y3-01Z-00-DX1.8AA5F695-A06C-4DEA-AD71-16254A48B218-32-111384x73022-3480x2281.png	2281	253.905	555.862	1701.99	1027.6	1679.32	1005.45	1690.16	1016.01	2.68008	365.031	0.79356	16.9686	0.992794	0.486368	0.437653	26.5852	26.7248	5.14969	2.11366	1.84617	15.2475	14.4458	2.73999	87.9662	0.718504	0.431334	0.0548474	0.124637	0.062747	0.0336403	0.0234181	0.0225931	0.0302332	0.0267801	0.016603	0.0173158	0.0131651	0.0122834	0.0135208	0.0146062	0.0155593	0.0102552	0.0107265	0.0104943	0.00865197	0.00853517	0.00918199	0.00928846
TCGA-D8-A27E-01Z-00-DX1.7950998F-7E23-4C70-A926-1ADAA5A20BED-32-102816x82101-3213x2565.png	2565	256.033	572.703	1809.09	1229.56	1787.94	1205.04	1798.05	1216.74	2.44494	357.508	0.822894	17.0136	0.99339	0.495811	0.477451	28.5735	28.3221	5.23094	2.17527	1.92561	14.0442	13.4307	-4.36256	84.2922	0.74542	0.414783	0.053284	0.120211	0.0644718	0.0326911	0.0209614	0.0236755	0.0311333	0.0274174	0.0167604	0.0162849	0.0117237	0.0123706	0.0137973	0.0149675	0.0160554	0.0100452	0.0101544	0.00979004	0.00777495	0.00860922	0.00893174	0.00933969
TCGA-D8-A27F-01Z-00-DX1.C1A87F27-49F1-46BA-B2E2-A89293F7FD0C-32-158032x55086-4938x1721.png	1721	265.403	556.641	2385.92	833.013	2363.53	810.508	2374.19	821.28	2.37319	364.187	0.793684	17.4107	0.995653	0.513576	0.482728	26.8207	26.8769	5.47883	2.24914	1.99222	15.137	14.4368	-4.14198	85.2343	0.754383	0.453733	0.0576857	0.128482	0.0661351	0.0340288	0.023552	0.0219897	0.0306046	0.0275354	0.0163222	0.0171934	0.0129312	0.0119199	0.0134079	0.0145609	0.0157573	0.00995101	0.0104021	0.0101155	0.00837248	0.00853072	0.00906036	0.00893219
TCGA-D8-A27G-01Z-00-DX1.04FCF306-67AA-4F56-AE90-44A4F5DD56D4-32-90440x72935-2826x2279.png	2279	283.521	594.224	1374.91	1241.3	1352.01	1217.74	1362.97	1229.03	2.39881	392.138	0.788779	17.9568	0.992967	0.510933	0.47497	27.701	27.9012	5.63309	2.29598	2.03084	15.7593	14.9256	-1.11088	88.2169	0.746557	0.449234	0.055847	0.130358	0.0636757	0.0331256	0.0234365	0.0218243	0.0306494	0.0270036	0.0160723	0.0173547	0.0130517	0.0119759	0.0131409	0.0147873	0.0157073	0.00985204	0.0103299	0.0102933	0.00842478	0.0081534	0.00892056	0.00897294
TCGA-D8-A27H-01Z-00-DX1.BE9DFDD4-97C5-4327-B1DA-4B34A6F267C5-32-84728x82169-2647x2567.png	2567	205.649	468.645	1104.75	1041.49	1084.09	1020.5	1093.89	1030.48	2.70479	304.567	0.803609	15.4529	0.997413	0.472906	0.434492	25.1874	24.9817	4.60843	1.94107	1.68649	13.8103	13.1911	-4.82562	80.2627	0.703548	0.414272	0.0551637	0.114967	0.0630254	0.0346031	0.0232717	0.0232047	0.0300756	0.0278058	0.0175659	0.017632	0.0128933	0.0125771	0.0143482	0.0148476	0.0162828	0.0106106	0.0111734	0.0104195	0.00867391	0.0090397	0.00950374	0.00988178
TCGA-D8-A27I-01Z-00-DX1.ACAE0048-7AF0-41C9-992B-6ACDABF80B1C-32-75208x63122-2350x1972.png	1972	321.698	664.658	1054.64	742.47	1029.25	718.736	1041.46	730.104	2.34119	440.941	0.786609	19.1023	0.99143	0.5146	0.480108	29.2137	29.5131	6.07389	2.44331	2.16626	16.8159	15.8733	-1.43958	92.6509	0.750441	0.451757	0.0553355	0.133202	0.0635525	0.032646	0.0233883	0.0219435	0.0311585	0.0264667	0.0158223	0.0172649	0.0128089	0.0117473	0.0130585	0.0149471	0.0154569	0.00938921	0.010078	0.010171	0.0081501	0.00790934	0.00867703	0.00862986
TCGA-D8-A27K-01Z-00-DX1.25AF7928-046B-45BF-BAD6-F34156203F5A-32-74256x85991-2320x2687.png	2687	208.018	455.43	1244.4	1357.03	1223.82	1336.54	1233.61	1346.31	2.60461	297.011	0.79925	15.4911	0.997872	0.485295	0.444423	24.7987	24.6589	4.68946	1.97545	1.71723	13.6234	13.0812	-1.41617	78.7858	0.719384	0.425602	0.0556157	0.117625	0.0635977	0.0339568	0.0233997	0.0232311	0.029843	0.027517	0.0172539	0.0171817	0.0133342	0.012862	0.0140302	0.0146412	0.0164074	0.0105488	0.0107848	0.0104422	0.00849474	0.00926639	0.00959301	0.00964505
TCGA-D8-A27L-01Z-00-DX1.6572593C-B015-4F9A-8C9B-B634CAA0D3B4-32-93296x78682-2915x2458.png	2458	260.826	560.09	1225.05	1201.76	1202.55	1179.01	1213.31	1189.9	2.49899	365.262	0.802267	17.2238	0.994774	0.499081	0.45845	27.3267	27.396	5.31493	2.18652	1.92881	14.9284	14.1988	-1.64229	86.2831	0.738217	0.430176	0.0551021	0.12495	0.0638044	0.0338553	0.0228948	0.0231458	0.0308081	0.0275217	0.0166638	0.016951	0.0126517	0.0122557	0.0136436	0.0148284	0.015857	0.00999754	0.0103921	0.0101814	0.0083587	0.00860249	0.00904874	0.00911137
TCGA-D8-A27M-01Z-00-DX1.3020D223-2400-4A2D-8BFE-08A5B78FE13B-32-93296x65523-2915x2047.png	2047	245.581	532.171	1483.19	1088.09	1460.72	1066.69	1471.46	1076.88	2.50391	348.172	0.79676	16.6911	0.994773	0.495511	0.460868	26.2725	26.3279	5.15021	2.12913	1.87591	14.6794	13.9463	-2.13144	83.9181	0.731744	0.435653	0.0558451	0.124838	0.0640631	0.0338772	0.0231956	0.0230807	0.0307213	0.0273982	0.0165628	0.017178	0.0131179	0.0123569	0.0137644	0.0146268	0.0161291	0.0101622	0.0106213	0.010352	0.00848528	0.00857951	0.00916647	0.00925815
TCGA-D8-A27N-01Z-00-DX1.85613A4F-1FFB-4091-B925-8E8A7C7A6D95-32-178024x65376-5563x2043.png	2043	314.914	647.66	3143.56	1019.03	3119.72	994.62	3131.16	1006.3	2.23935	429.1	0.78108	18.9537	0.989846	0.525113	0.496288	28.4835	28.7368	6.05766	2.44685	2.17829	16.7033	15.7616	1.38935	90.6326	0.762201	0.469106	0.0573107	0.135563	0.0651918	0.033548	0.024057	0.0211589	0.0310686	0.0271811	0.0160356	0.017296	0.0132649	0.0117019	0.0127702	0.014667	0.0156226	0.00959893	0.0100435	0.0101909	0.0086706	0.0079391	0.00862444	0.00868286
TCGA-D8-A27P-01Z-00-DX1.EF426996-D0DC-4418-BEC4-F7CE3C82C869-32-92344x77536-2885x2423.png	2423	285.309	620.758	1380.68	956.605	1357.03	933.056	1368.38	944.367	2.42774	396.338	0.800427	17.9962	0.992168	0.501124	0.471508	28.4757	28.524	5.60823	2.29039	2.02383	15.5133	14.716	-2.27988	89.005	0.747197	0.43847	0.0551959	0.127846	0.0643697	0.0337681	0.0226606	0.0224699	0.0308759	0.0272748	0.0165019	0.0170291	0.0126502	0.0122073	0.0134038	0.0150328	0.0158012	0.00994608	0.0103358	0.00994383	0.00832601	0.00826918	0.00888557	0.00910158
TCGA-D8-A27R-01Z-00-DX1.F6E2FD1C-0666-4788-8D95-A76D15907270-32-116144x78762-3629x2461.png	2461	218.299	493.852	1704.52	1146.8	1683.36	1125.42	1693.46	1135.6	2.82928	323.539	0.794367	15.8093	0.995918	0.469823	0.413796	25.4315	25.381	4.68715	1.9546	1.68048	14.3568	13.6925	1.15855	83.829	0.694772	0.414816	0.0550556	0.116073	0.0614691	0.034478	0.0238008	0.0226596	0.0295455	0.0272533	0.0172616	0.0177868	0.0133787	0.0124877	0.0140157	0.0148903	0.0162287	0.0106123	0.0109356	0.0105903	0.00883854	0.00912098	0.00961952	0.00971105
TCGA-D8-A27T-01Z-00-DX1.1E3A4D57-9CF2-4EBF-B74D-ADD7BD8CBFA5-32-100912x83588-3153x2612.png	2612	290.033	628.64	1578.76	1150.26	1555.11	1125.98	1566.43	1137.6	2.44047	397.625	0.816111	18.1716	0.991153	0.502795	0.464961	29.391	29.6286	5.6073	2.29371	2.03376	15.1829	14.4136	-3.68692	90.0251	0.750594	0.419795	0.0526688	0.128369	0.0636133	0.0328375	0.0211846	0.0242588	0.0320077	0.0271291	0.0161576	0.0166007	0.0118689	0.0122878	0.0135747	0.0152384	0.0157063	0.00966769	0.0100614	0.00981187	0.00780228	0.00814754	0.00876595	0.00904321
TCGA-D8-A27V-01Z-00-DX1.F937C53B-0B55-4271-843E-2C28F72CF28E-32-169456x91892-5295x2871.png	2871	313.682	635.363	2427.17	1278.27	2403.31	1254.07	2414.73	1265.67	2.29344	425.249	0.781208	18.9046	0.988668	0.525728	0.484958	28.4677	28.7493	5.9969	2.42562	2.15751	16.6003	15.7134	1.53265	91.1687	0.759882	0.465375	0.0566429	0.135301	0.0644781	0.0331159	0.0237569	0.021118	0.031013	0.0272061	0.0156953	0.0171703	0.013144	0.0116169	0.0129551	0.0147532	0.0156007	0.00949886	0.0100582	0.0101249	0.00851998	0.00794401	0.0086833	0.00864852
TCGA-D8-A27W-01Z-00-DX1.CE2D4FEA-284C-44AF-A70F-7956D91CCB29-32-158032x81570-4938x2549.png	2549	193.363	442.481	2534.76	1295.69	2515.24	1274.84	2524.51	1284.75	2.49766	280.453	0.821093	14.9829	0.997463	0.485434	0.467686	25.0229	24.652	4.51906	1.93446	1.70076	12.787	12.2268	-0.454318	75.1169	0.726036	0.414391	0.0556881	0.113786	0.0663235	0.034663	0.0229238	0.0235325	0.0306249	0.0285151	0.0175064	0.0169722	0.012806	0.0126867	0.0141644	0.0148224	0.0165805	0.0103556	0.0107097	0.0100921	0.00835524	0.00924191	0.00947496	0.0096228
TCGA-D8-A3Z5-01Z-00-DX1.4DBF937F-623C-4212-8493-ECE3C8F555E3-32-120904x79899-3778x2496.png	2496	301.563	638.443	1955.3	1153.8	1931.07	1129.96	1942.68	1141.38	2.432	417.051	0.790642	18.5219	0.990151	0.506721	0.465059	28.5871	28.8379	5.78306	2.34299	2.07285	16.2889	15.3769	-8.67418	91.5816	0.744453	0.446569	0.0553469	0.13155	0.0636874	0.0333087	0.023271	0.0218124	0.0309604	0.0270292	0.0160751	0.0172981	0.0130682	0.0118036	0.013131	0.0149373	0.015593	0.0096605	0.0102194	0.010195	0.00842506	0.00805967	0.00887327	0.00883786
TCGA-D8-A3Z6-01Z-00-DX1.4076A770-5901-4325-85C3-AF7B192272F5-32-90440x74582-2826x2330.png	2330	293.155	589.884	1339.87	838.06	1317.62	813.872	1328.26	825.445	2.25387	395.575	0.787096	18.3289	0.992293	0.528994	0.494061	27.5662	27.8389	5.85277	2.38165	2.12041	15.982	15.1596	-2.81979	87.4851	0.763474	0.464069	0.0568222	0.135586	0.065729	0.0331924	0.0233104	0.0214195	0.0311087	0.0274578	0.0156685	0.0172894	0.0129537	0.011661	0.0128531	0.0147802	0.0157422	0.00962787	0.0101253	0.0100611	0.00851999	0.00797299	0.00881736	0.00875334
TCGA-D8-A4Z1-01Z-00-DX1.D39D38B5-FC9F-4298-8720-016407DC6591-32-107575x83036-3361x2594.png	2594	251.478	543.411	2030.51	1054.08	2008.07	1031.8	2018.76	1042.46	2.4357	350.987	0.812396	16.8868	0.9944	0.497051	0.469686	27.5071	27.4111	5.23065	2.16965	1.91422	14.3579	13.6373	0.335887	83.2897	0.738239	0.421209	0.0542886	0.122375	0.0637277	0.0331639	0.0217524	0.0233329	0.0307719	0.0276614	0.0163978	0.016554	0.0123344	0.0126722	0.01363	0.014794	0.016154	0.00988757	0.0102251	0.0100546	0.00824949	0.00866042	0.0092224	0.0091066
TCGA-D8-A73U-01Z-00-DX1.6ECEF7C0-00CC-4AC2-87BD-DBFB6E0DC042-32-83663x77489-2614x2421.png	2421	285.048	631.113	943.593	1050.44	918.504	1027.62	930.542	1038.54	2.53663	399.298	0.805295	17.9307	0.988586	0.493631	0.453525	29.3057	29.3376	5.50705	2.25285	1.98905	15.346	14.4948	-1.07541	90.299	0.735428	0.421657	0.0516262	0.12503	0.0619144	0.032122	0.0219669	0.0230777	0.0313431	0.0268986	0.0158251	0.0166184	0.0121991	0.0122143	0.0136523	0.0149666	0.0156681	0.00964159	0.0101635	0.00992244	0.00817737	0.00847726	0.00892991	0.0089308
TCGA-D8-A73W-01Z-00-DX1.2A4B8A37-BE62-42C8-A109-800A7970FF0F-32-101591x86188-3174x2693.png	2693	248.318	563.389	1849.91	1269.27	1828.04	1245.59	1838.47	1256.94	2.49773	353.155	0.821329	16.844	0.994442	0.491267	0.469314	28.4112	28.1951	5.13302	2.13877	1.89312	14.1567	13.4918	-3.55686	84.3786	0.73687	0.409981	0.0532338	0.118468	0.0642173	0.0334343	0.0219009	0.0239852	0.0309249	0.0273361	0.016837	0.0168161	0.0120097	0.0126185	0.0138751	0.0147829	0.0158327	0.010045	0.0104563	0.00987522	0.00794187	0.00865595	0.00918591	0.00911099
TCGA-D8-A73X-01Z-00-DX1.5F0DF75C-594C-42DF-BE3F-E00E5E01DCD6-32-59759x72601-1867x2268.png	2268	228.081	501.193	1055.48	1010.43	1033.65	989.254	1044.04	999.345	2.5957	325.701	0.804802	16.2379	0.993404	0.489703	0.444602	26.0285	25.963	4.93068	2.05243	1.79997	14.1998	13.5317	3.01824	82.6006	0.724036	0.423775	0.0554079	0.120878	0.0635995	0.0342693	0.0227677	0.0232475	0.030533	0.0280418	0.0167456	0.0171417	0.0127794	0.0122708	0.0139841	0.0147994	0.016388	0.0102813	0.0106447	0.010032	0.00837549	0.00887501	0.00942331	0.0094586
TCGA-E2-A1AZ-01Z-00-DX1.FE769F5F-385B-4DCF-819A-735C98D84FA8-32-122808x81864-3837x2558.png	2558	295.847	629.492	1466.23	1293.32	1442.41	1269.31	1453.83	1280.83	2.51685	417.244	0.787285	18.3481	0.991821	0.500396	0.454562	28.2881	28.5797	5.70294	2.30701	2.03189	16.4296	15.4706	-0.364902	92.036	0.731354	0.442466	0.0558571	0.12959	0.0625112	0.0338529	0.0234046	0.0215132	0.03069	0.0265083	0.0163495	0.0174979	0.0129122	0.0118547	0.0131522	0.0148158	0.0154074	0.00989267	0.0103642	0.0102065	0.00848564	0.00808065	0.0087628	0.00901279
TCGA-E2-A1B0-01Z-00-DX1.4C50EC91-A62A-450E-88C0-7DCAB8E9724C-32-110432x81580-3451x2549.png	2549	305.283	624.911	1487.42	1035.92	1463.12	1012.4	1474.77	1023.66	2.30053	414.553	0.781774	18.6921	0.990756	0.51847	0.485237	28.1907	28.6066	5.99487	2.42007	2.14066	16.4323	15.5617	-2.21999	89.9164	0.756352	0.459034	0.0571642	0.13492	0.0632534	0.0332933	0.023344	0.0215665	0.03058	0.0267053	0.0160362	0.0169333	0.0130214	0.0117341	0.0128987	0.0146186	0.0153843	0.0096288	0.0100678	0.0101625	0.0083923	0.0080336	0.00859454	0.00872277
TCGA-E2-A1B1-01Z-00-DX1.7C8DF153-B09B-44C7-87B8-14591E319354-32-121856x90588-3808x2830.png	2830	255.368	582.611	914.704	1441.97	891.724	1418.75	902.699	1429.89	2.49834	361.751	0.819602	17.0486	0.994331	0.479259	0.460094	28.65	28.4154	5.19564	2.15925	1.90962	14.4446	13.6283	-2.41777	84.9365	0.728562	0.4069	0.0522763	0.119051	0.0627925	0.0328243	0.0218489	0.0228671	0.0311651	0.0269759	0.016686	0.0167675	0.012146	0.0122531	0.0139371	0.014958	0.0157084	0.0100874	0.0102953	0.00989731	0.00812165	0.0086041	0.0089182	0.00921297
TCGA-E2-A1B4-01Z-00-DX1.E585C4FB-0D3E-4160-8192-53A329648F5C-32-133280x88407-4165x2762.png	2762	301.219	644.812	1180.27	1245.14	1157.97	1218.7	1168.58	1231.4	2.37966	414.803	0.812735	18.5064	0.994097	0.504213	0.474835	29.8871	30.0204	5.78536	2.35717	2.0916	15.6334	14.7913	4.34427	90.4603	0.749773	0.423874	0.0543259	0.127262	0.0635837	0.0331749	0.0216616	0.0235868	0.0314492	0.0268949	0.016361	0.0167014	0.012201	0.0119332	0.0134551	0.0147945	0.0154036	0.00976063	0.0100511	0.0098967	0.00791358	0.00804142	0.00865409	0.00879512
TCGA-E2-A1B5-01Z-00-DX1.AB19FF3D-5C42-4D49-ABEA-D2315709B6EA-32-127568x81025-3986x2532.png	2532	312.988	655.303	1740.38	1121.85	1715.57	1098.05	1727.46	1109.43	2.31363	428.281	0.78758	18.8666	0.991104	0.518	0.484874	28.9591	29.184	5.96346	2.41333	2.15008	16.4718	15.5347	1.94249	91.507	0.757375	0.458667	0.05578	0.133489	0.0643452	0.0327798	0.0233942	0.0213894	0.0311543	0.026932	0.0157536	0.0170323	0.0129757	0.0119126	0.0129155	0.0146816	0.015437	0.00947681	0.0100691	0.0101659	0.00838079	0.00798124	0.00870123	0.00865351
TCGA-E2-A105-01Z-00-DX1.192813F9-2D7B-40C7-88D9-BFA939D43FEE-32-97103x79079-3034x2471.png	2471	259.603	575.112	1850.5	1011.42	1827.68	988.415	1838.62	999.417	2.38755	358.841	0.808505	17.2842	0.994713	0.499591	0.480635	27.9951	28.0361	5.40148	2.22967	1.97555	14.6034	13.8784	-6.18115	84.3824	0.749421	0.428512	0.0547086	0.126326	0.0636636	0.0326116	0.0219487	0.0229912	0.0311488	0.0271936	0.0161194	0.0164947	0.012212	0.012093	0.0134466	0.0147984	0.0157381	0.00970029	0.0100404	0.00992045	0.00800059	0.00836416	0.00892244	0.00898422
TCGA-E2-A106-01Z-00-DX1.A8D49C06-3C93-48A6-87F8-86D646BEA28C-32-107575x81725-3361x2553.png	2553	271.442	559.798	1186.26	954.467	1161.98	933.569	1173.65	943.553	2.28781	371.983	0.790851	17.5874	0.992495	0.519786	0.495251	27.101	27.1378	5.5825	2.29275	2.0327	15.2878	14.5769	3.05192	84.4089	0.756548	0.456495	0.0581493	0.128432	0.0654642	0.0337213	0.0237391	0.0220953	0.0301527	0.0277055	0.0163242	0.0169695	0.0133157	0.0122649	0.0133837	0.0144295	0.0159919	0.00993791	0.0103078	0.0103248	0.00847219	0.00837599	0.00909133	0.00905225
TCGA-E2-A107-01Z-00-DX1.3BFCCC24-7286-488D-A9E9-98E498AD0767-32-117095x93049-3659x2907.png	2907	230.382	524.441	1758.49	1474.9	1735.78	1453.78	1746.61	1463.84	2.79191	337.56	0.806537	16.2291	0.994584	0.473563	0.422237	26.611	26.5008	4.80672	2.00399	1.74362	14.3611	13.6324	0.749545	85.4048	0.704525	0.410311	0.0534111	0.11764	0.0618965	0.0334497	0.0226666	0.0229466	0.0301475	0.027046	0.0168661	0.0171662	0.0128741	0.0125538	0.0140087	0.0148461	0.0158433	0.0103403	0.0108819	0.0103342	0.00854426	0.00884985	0.00938587	0.00937017
TCGA-E2-A108-01Z-00-DX1.B110ED43-08A4-476A-A658-1CA75F7C0DDE-32-126615x81603-3956x2550.png	2550	296.32	635.186	2002.18	1356.35	1977.96	1332.54	1989.58	1343.97	2.34782	409.801	0.800459	18.3597	0.992348	0.504802	0.480301	28.8794	29.1196	5.78788	2.35313	2.08486	15.8546	14.9593	3.455	89.45	0.749128	0.437068	0.0555434	0.130044	0.0635354	0.0336191	0.0225827	0.0227029	0.0312746	0.0268476	0.0161628	0.0170118	0.0124211	0.0119709	0.0131974	0.0149564	0.0154915	0.00971593	0.0101601	0.00996251	0.00810672	0.00809611	0.0086996	0.00885548
TCGA-E2-A109-01Z-00-DX1.FCF5E9FC-F9FE-4F5F-96DD-5628E2609BEF-32-97103x83830-3034x2619.png	2619	282.845	590.131	1389.06	1440.47	1365.15	1418.09	1376.58	1428.79	2.32648	387.47	0.790152	17.9651	0.993905	0.51624	0.485024	27.5809	27.8029	5.66797	2.31784	2.05918	15.7031	14.8681	0.0198389	86.9282	0.753846	0.452585	0.0565545	0.131714	0.0643075	0.0335298	0.0231691	0.0221204	0.0307831	0.0273976	0.0159699	0.0170313	0.0126676	0.0118877	0.0130833	0.0147528	0.0158395	0.00971839	0.0101763	0.00999293	0.00843581	0.00817739	0.00879645	0.00891344
TCGA-E2-A10A-01Z-00-DX1.98B19EF1-0DAE-4DC6-8B0E-963CFABC6724-32-105671x93187-3302x2912.png	2912	294.821	607.548	1589.72	1553.09	1566	1529.85	1577.38	1540.98	2.26793	400.166	0.789524	18.3317	0.992345	0.520294	0.494059	27.9069	28.1889	5.837	2.37735	2.11757	15.9444	15.1476	-0.99654	87.8265	0.762218	0.457155	0.0568117	0.133737	0.0647445	0.0332921	0.0233407	0.0220572	0.0309079	0.0272924	0.0160487	0.0171033	0.01271	0.0119195	0.0130213	0.0146295	0.0157906	0.00964515	0.0102394	0.0101222	0.0083678	0.0081023	0.00878795	0.00875897
TCGA-E2-A10B-01Z-00-DX1.148CFC4B-EE65-4A7E-918F-10C72F37CB0F-32-110431x93199-3450x2912.png	2912	284.535	595.625	1441.34	1023.11	1418.12	999.842	1429.24	1010.99	2.46766	395.164	0.786792	17.9747	0.989432	0.509654	0.467754	27.6383	27.7922	5.59873	2.28469	2.02046	15.9123	15.0955	0.946826	89.0784	0.742198	0.451038	0.0555057	0.13009	0.0635201	0.0331329	0.0232479	0.0214578	0.0305243	0.0267091	0.0161441	0.0171098	0.0131553	0.0120205	0.0130881	0.0147441	0.0155716	0.00979657	0.0103939	0.0103151	0.00855603	0.0082831	0.00893253	0.00887997
TCGA-E2-A10C-01Z-00-DX1.29A2B20B-29C6-4491-ADAB-0584C772EF25-32-112335x90745-3510x2835.png	2835	276.786	595.568	1586.33	1735.26	1561.83	1713.19	1573.58	1723.71	2.47408	385.738	0.799111	17.745	0.992515	0.501605	0.463513	28.1068	28.2255	5.4816	2.24804	1.99036	15.3934	14.594	-1.45195	88.2732	0.74047	0.433596	0.0547981	0.127284	0.0631861	0.0332058	0.0227864	0.022369	0.0308169	0.0271847	0.0164423	0.0168832	0.0128198	0.0119279	0.0132396	0.0151386	0.0156836	0.0099444	0.0102767	0.0101402	0.00841299	0.00814729	0.00884793	0.00917096
TCGA-E2-A10E-01Z-00-DX1.C45030A9-CC1A-4BA7-8F62-872619C5AD5E-32-114239x96156-3569x3004.png	3004	250.946	559.36	1558.07	1594.59	1535.77	1571.55	1546.42	1582.58	2.66634	360.187	0.812456	16.9217	0.993509	0.482913	0.437232	27.6297	27.662	5.08376	2.10043	1.84115	14.68	13.9275	-4.78296	87.5332	0.722177	0.41106	0.0537012	0.121017	0.0624785	0.0340468	0.0221391	0.0232235	0.0307104	0.0270248	0.0169213	0.0171336	0.0124343	0.0122899	0.013784	0.0147781	0.0157788	0.0101665	0.0105027	0.0101645	0.00812473	0.0086254	0.00917847	0.0091822
TCGA-E2-A10F-01Z-00-DX1.18F9324C-A38F-478E-95DF-B8E172D0DD07-32-112335x73873-3510x2308.png	2308	308.18	656.848	1692.88	1300.71	1664.68	1279.52	1678.31	1289.63	2.3956	425.163	0.813374	18.715	0.990014	0.50682	0.473992	30.1922	30.5793	5.86151	2.3781	2.10786	15.7935	14.9517	6.44359	91.861	0.750711	0.4186	0.0526469	0.129269	0.0624392	0.0327931	0.0208376	0.0237658	0.0313296	0.0265496	0.0164351	0.016565	0.0117958	0.0119279	0.0132508	0.0149119	0.0153118	0.00979715	0.0101635	0.00987357	0.00756459	0.00795593	0.0086237	0.00896038
[truncated: 257 more rows]
[truncated: 984 more columns]
